# Supplementary material for: A Portable, Low-Cost, Point-of-Care DNA Amplification Kit with Impedance-Based Detection for Decentralized Antimicrobial Resistance Diagnostics
Source: Royal Society of Chemistry journal article supplement (doi:10.1039/d6lc00062b), 2026-01-01
Supplement: d6lc00062b1.xlsx [file d6lc00062b1.xlsx]

## Sheet: Data
Project Phase	SPECIFICITY																																																SENSITIVITY
Done By	AMPLIFICATION KIT (HEAT BLOCK)																								THERMOCYCLER																								AMPLIFICATION KIT (HEAT BLOCK)
Sample's Directory		C:\Users\koosh\OneDrive - Rutgers University\Desktop\Koosha\University Materials\Rutgers\NBEL\Research Materials\Test Results\Amplification Kit Tests at Dr.DB's lab\Amp Kit tests at DB's from 6.3.2025\RE TEST with new wafer and channel\Amp kit\DN		C:\Users\koosh\OneDrive - Rutgers University\Desktop\Koosha\University Materials\Rutgers\NBEL\Research Materials\Test Results\Amplification Kit Tests at Dr.DB's lab\Amp kit tests from 6.17.2025\Amp kit\DN		C:\Users\koosh\OneDrive - Rutgers University\Desktop\Koosha\University Materials\Rutgers\NBEL\Research Materials\Test Results\Amplification Kit Tests at Dr.DB's lab\Amp kit tests from 6.24.2025\Amp kit\DN		C:\Users\koosh\OneDrive - Rutgers University\Desktop\Koosha\University Materials\Rutgers\NBEL\Research Materials\Test Results\Amplification Kit Tests at Dr.DB's lab\New gene block and reaction mix on 5.16.2025\Amplification kit (HB)\After IPA wash\PN		C:\Users\koosh\OneDrive - Rutgers University\Desktop\Koosha\University Materials\Rutgers\NBEL\Research Materials\Test Results\Amplification Kit Tests at Dr.DB's lab\Amp Kit tests at DB's from 6.3.2025\RE TEST with new wafer and channel\Amp kit\PN		C:\Users\koosh\OneDrive - Rutgers University\Desktop\Koosha\University Materials\Rutgers\NBEL\Research Materials\Test Results\Amplification Kit Tests at Dr.DB's lab\Amp kit tests from 6.24.2025\Amp kit\PN		C:\Users\koosh\OneDrive - Rutgers University\Desktop\Koosha\University Materials\Rutgers\NBEL\Research Materials\Test Results\Amplification Kit Tests at Dr.DB's lab\Amp Kit tests at DB's from 6.3.2025\RE TEST with new wafer and channel\Amp kit\DP		C:\Users\koosh\OneDrive - Rutgers University\Desktop\Koosha\University Materials\Rutgers\NBEL\Research Materials\Test Results\Amplification Kit Tests at Dr.DB's lab\Amp kit tests from 6.17.2025\Amp kit\DP		C:\Users\koosh\OneDrive - Rutgers University\Desktop\Koosha\University Materials\Rutgers\NBEL\Research Materials\Test Results\Amplification Kit Tests at Dr.DB's lab\Amp kit tests from 6.24.2025\Amp kit\DP		C:\Users\koosh\OneDrive - Rutgers University\Desktop\Koosha\University Materials\Rutgers\NBEL\Research Materials\Test Results\Amplification Kit Tests at Dr.DB's lab\New gene block and reaction mix on 5.16.2025\Amplification kit (HB)\After IPA wash\PP		C:\Users\koosh\OneDrive - Rutgers University\Desktop\Koosha\University Materials\Rutgers\NBEL\Research Materials\Test Results\Amplification Kit Tests at Dr.DB's lab\Amp kit tests from 6.17.2025\Amp kit\PP		C:\Users\koosh\OneDrive - Rutgers University\Desktop\Koosha\University Materials\Rutgers\NBEL\Research Materials\Test Results\Amplification Kit Tests at Dr.DB's lab\Amp kit tests from 6.30.2025\Amp kit\PP		C:\Users\koosh\OneDrive - Rutgers University\Desktop\Koosha\University Materials\Rutgers\NBEL\Research Materials\Test Results\Amplification Kit Tests at Dr.DB's lab\Amp Kit tests at DB's from 6.3.2025\RE TEST with new wafer and channel\Thermocycle\DN		C:\Users\koosh\OneDrive - Rutgers University\Desktop\Koosha\University Materials\Rutgers\NBEL\Research Materials\Test Results\Amplification Kit Tests at Dr.DB's lab\Amp kit tests from 6.17.2025\Thermocycler\DN		C:\Users\koosh\OneDrive - Rutgers University\Desktop\Koosha\University Materials\Rutgers\NBEL\Research Materials\Test Results\Amplification Kit Tests at Dr.DB's lab\Amp kit tests from 6.24.2025\Thermocycler\DN		C:\Users\koosh\OneDrive - Rutgers University\Desktop\Koosha\University Materials\Rutgers\NBEL\Research Materials\Test Results\Amplification Kit Tests at Dr.DB's lab\New gene block and reaction mix on 5.16.2025\redone thermocycler with no leakage\PN		C:\Users\koosh\OneDrive - Rutgers University\Desktop\Koosha\University Materials\Rutgers\NBEL\Research Materials\Test Results\Amplification Kit Tests at Dr.DB's lab\Amp Kit tests at DB's from 6.3.2025\RE TEST with new wafer and channel\Thermocycle\PN		C:\Users\koosh\OneDrive - Rutgers University\Desktop\Koosha\University Materials\Rutgers\NBEL\Research Materials\Test Results\Amplification Kit Tests at Dr.DB's lab\Amp kit tests from 6.24.2025\Thermocycler\PN		C:\Users\koosh\OneDrive - Rutgers University\Desktop\Koosha\University Materials\Rutgers\NBEL\Research Materials\Test Results\Amplification Kit Tests at Dr.DB's lab\Amp Kit tests at DB's from 6.3.2025\RE TEST with new wafer and channel\Thermocycle\DP		C:\Users\koosh\OneDrive - Rutgers University\Desktop\Koosha\University Materials\Rutgers\NBEL\Research Materials\Test Results\Amplification Kit Tests at Dr.DB's lab\Amp kit tests from 6.17.2025\Thermocycler\DP		C:\Users\koosh\OneDrive - Rutgers University\Desktop\Koosha\University Materials\Rutgers\NBEL\Research Materials\Test Results\Amplification Kit Tests at Dr.DB's lab\Amp kit tests from 6.24.2025\Thermocycler\DP		C:\Users\koosh\OneDrive - Rutgers University\Desktop\Koosha\University Materials\Rutgers\NBEL\Research Materials\Test Results\Amplification Kit Tests at Dr.DB's lab\New gene block and reaction mix on 5.16.2025\redone thermocycler with no leakage\PP		C:\Users\koosh\OneDrive - Rutgers University\Desktop\Koosha\University Materials\Rutgers\NBEL\Research Materials\Test Results\Amplification Kit Tests at Dr.DB's lab\Amp kit tests from 6.17.2025\Thermocycler\PP		C:\Users\koosh\OneDrive - Rutgers University\Desktop\Koosha\University Materials\Rutgers\NBEL\Research Materials\Test Results\Amplification Kit Tests at Dr.DB's lab\Amp kit tests from 6.30.2025\Thermocycler\PP
Samples	DN X1	DN 1	DN X2	DN 2	DN X3	DN 3	PN X1	PN 1	PN X2	PN 2	PN X3	PN 3	DP X1	DP 1	DP X2	DP 2	DP X3	DP 3	PP X1	PP 1	PP X2	PP 2	PP X3	PP 3	DN X1-T	DN 1-T	DN X2-T	DN 2-T	DN X3-T	DN 3-T	PN X1-T	PN 1-T	PN X2-T	PN 2-T	PN X3-T	PN 3-T	DP X1-T	DP 1-T	DP X2-T	DP 2-T	DP X3-T	DP 3-T	PP X1-T	PP 1-T	PP X2-T	PP 2-T	PP X3-T	PP 3-T	DN-10^0-X1
	5	4.66189e-05	10	3.91462e-05	15	8.0504e-05	20	6.75261e-05	25	2.8435e-05	30	2.83477e-05	35	2.42737e-05	40	2.36543e-05	45	3.77076e-05	50	2.48216e-05	55	2.74527e-05	60	3.96518e-05	65	0.000104046	70	4.02246e-05	75	4.721e-05	80	2.39759e-05	85	4.98639e-05	90	6.11598e-05	95	4.26873e-05	100	1.85981e-05	105	1.96379e-05	110	1.22901e-05	115	3.01256e-05	120	1.91756e-05	125
	5	8.69077e-05	10	4.55154e-05	15	8.52855e-05	20	5.25799e-05	25	4.91252e-05	30	2.74414e-05	35	2.02365e-05	40	3.0721e-05	45	3.08779e-05	50	1.81805e-05	55	3.61176e-05	60	4.82517e-05	65	0.000105027	70	3.85303e-05	75	0.000108814	80	2.3851e-05	85	5.52876e-05	90	0.00019952	95	2.44044e-05	100	0.000151404	105	1.95547e-05	110	1.72754e-05	115	3.64021e-05	120	2.46903e-05	125
	5	0.000126651	10	0.000153464	15	7.33025e-05	20	2.0607e-05	25	3.4913e-05	30	5.53671e-05	35	3.8631e-05	40	2.53104e-05	45	4.18117e-05	50	1.37275e-05	55	3.69544e-05	60	4.9253e-05	65	9.80519e-05	70	3.30905e-05	75	4.91171e-05	80	1.74494e-05	85	4.99296e-05	90	6.58739e-05	95	3.56179e-05	100	1.73025e-05	105	2.24431e-05	110	2.69082e-05	115	9.11398e-05	120	2.55579e-05	125
	5	3.65964e-05	10	4.64981e-05	15	4.67405e-05	20	2.07407e-05	25	4.14637e-05	30	5.43787e-05	35	4.26821e-05	40	6.36664e-05	45	4.89571e-05	50	1.34932e-05	55	3.83008e-05	60	8.36354e-05	65	8.13114e-05	70	3.24346e-05	75	0.00112667	80	4.64369e-05	85	6.16264e-05	90	0.000151211	95	3.3271e-05	100	2.11892e-05	105	0.000158518	110	0.000113762	115	3.29633e-05	120	2.02401e-05	125
	5	3.83049e-05	10	5.76784e-05	15	3.12616e-05	20	1.95257e-05	25	3.87816e-05	30	4.67998e-05	35	2.94332e-05	40	1.86534e-05	45	4.19411e-05	50	1.54349e-05	55	7.87384e-05	60	4.81182e-05	65	9.06286e-05	70	3.75168e-05	75	7.30516e-05	80	3.74505e-05	85	5.32233e-05	90	9.63667e-05	95	2.19875e-05	100	2.29249e-05	105	2.13114e-05	110	4.48034e-05	115	4.87562e-05	120	2.91495e-05	125
	5	3.62817e-05	10	4.09689e-05	15	3.50936e-05	20	3.54741e-05	25	2.98009e-05	30	3.5665e-05	35	3.20249e-05	40	1.80875e-05	45	3.74189e-05	50	3.42396e-05	55	2.7854e-05	60	4.42255e-05	65	4.8735e-05	70	4.4275e-05	75	0.000105574	80	1.82785e-05	85	4.79135e-05	90	7.45909e-05	95	3.78932e-05	100	3.99732e-05	105	3.56663e-05	110	0.000164432	115	7.8163e-05	120	1.96497e-05	125
	5	4.41104e-05	10	0.000141388	15	3.9008e-05	20	3.70109e-05	25	3.52344e-05	30	3.86856e-05	35	2.08327e-05	40	2.32246e-05	45	4.49709e-05	50	1.91987e-05	55	5.01124e-05	60	2.74093e-05	65	5.05286e-05	70	7.27062e-05	75	5.62584e-05	80	0.000108173	85	4.97995e-05	90	6.88926e-05	95	2.52732e-05	100	1.87549e-05	105	3.22129e-05	110	4.24354e-05	115	3.81301e-05	120	1.35204e-05	125
	5	5.27011e-05	10	4.25866e-05	15	3.21588e-05	20	2.40184e-05	25	3.65531e-05	30	3.49427e-05	35	2.75481e-05	40	3.86769e-05	45	3.68479e-05	50	1.53182e-05	55	2.92725e-05	60	3.55681e-05	65	5.36197e-05	70	7.20949e-05	75	7.38488e-05	80	5.33687e-05	85	6.42109e-05	90	5.49391e-05	95	2.58677e-05	100	2.66026e-05	105	7.78712e-05	110	1.44515e-05	115	3.19968e-05	120	1.57127e-05	125
	5	5.46551e-05	10	3.24268e-05	15	4.87613e-05	20	3.95683e-05	25	3.86847e-05	30	2.75392e-05	35	3.23909e-05	40	0.000122228	45	3.98343e-05	50	1.33528e-05	55	2.71954e-05	60	2.94325e-05	65	0.00016041	70	7.88382e-05	75	5.03104e-05	80	0.000108407	85	5.69875e-05	90	0.000104899	95	2.33224e-05	100	2.22632e-05	105	2.79044e-05	110	5.25927e-05	115	3.95494e-05	120	1.45409e-05	125
	5	3.92861e-05	10	5.73554e-05	15	3.23062e-05	20	4.29038e-05	25	4.13665e-05	30	2.82245e-05	35	2.96645e-05	40	2.87965e-05	45	4.48401e-05	50	1.993e-05	55	3.0283e-05	60	5.7731e-05	65	0.000169672	70	7.73702e-05	75	8.8868e-05	80	3.22138e-05	85	4.78568e-05	90	0.000215704	95	2.57608e-05	100	2.05499e-05	105	2.10972e-05	110	4.16282e-05	115	3.07689e-05	120	2.13652e-05	125
	5	3.79922e-05	10	4.63365e-05	15	3.40389e-05	20	2.02019e-05	25	4.6605e-05	30	2.87131e-05	35	2.57042e-05	40	2.37487e-05	45	3.00421e-05	50	1.41422e-05	55	2.66432e-05	60	3.22948e-05	65	7.43117e-05	70	4.236e-05	75	4.77377e-05	80	1.71013e-05	85	6.15486e-05	90	0.000671927	95	2.84554e-05	100	0.000299601	105	2.01308e-05	110	3.82336e-05	115	3.18926e-05	120	1.68779e-05	125
	5	7.60096e-05	10	8.68104e-05	15	3.10492e-05	20	3.09802e-05	25	3.26328e-05	30	4.10573e-05	35	2.31199e-05	40	1.89302e-05	45	2.79224e-05	50	1.33629e-05	55	4.39556e-05	60	3.93047e-05	65	0.000981619	70	3.10875e-05	75	0.000113434	80	2.92321e-05	85	5.85503e-05	90	0.000242737	95	2.10371e-05	100	1.8775e-05	105	8.63844e-05	110	7.45336e-05	115	4.32358e-05	120	2.00494e-05	125
	5	3.75635e-05	10	0.00011786	15	2.97101e-05	20	3.61314e-05	25	2.78557e-05	30	3.05406e-05	35	3.60433e-05	40	1.95721e-05	45	3.65532e-05	50	1.57634e-05	55	2.67195e-05	60	0.000657371	65	0.000155418	70	3.6599e-05	75	5.68807e-05	80	0.000168348	85	4.92753e-05	90	0.000248789	95	2.94168e-05	100	2.34909e-05	105	2.39804e-05	110	2.87898e-05	115	3.28676e-05	120	1.42889e-05	125
	5	4.21837e-05	10	0.00013135	15	0.00655138	20	2.96874e-05	25	2.77932e-05	30	5.78537e-05	35	2.00176e-05	40	2.44679e-05	45	6.39713e-05	50	1.3957e-05	55	6.92238e-05	60	5.00153e-05	65	4.97078e-05	70	3.73387e-05	75	8.84043e-05	80	2.3465e-05	85	4.57409e-05	90	0.000238471	95	2.1231e-05	100	2.18856e-05	105	0.000833251	110	1.29633e-05	115	0.000111313	120	2.15746e-05	125
	5	4.33908e-05	10	5.8552e-05	15	3.09793e-05	20	2.16595e-05	25	3.3487e-05	30	4.53394e-05	35	2.15789e-05	40	0.000151364	45	6.29889e-05	50	1.41293e-05	55	5.97154e-05	60	0.000140896	65	5.78964e-05	70	0.000113262	75	0.000108849	80	1.85677e-05	85	5.11979e-05	90	0.000203775	95	7.74435e-05	100	6.63138e-05	105	3.3066e-05	110	0.000117275	115	3.33941e-05	120	2.96333e-05	125
	5	4.97283e-05	10	7.11849e-05	15	3.86097e-05	20	2.25651e-05	25	3.69278e-05	30	5.3046e-05	35	0.000292382	40	6.00394e-05	45	2.6686e-05	50	1.42683e-05	55	3.51703e-05	60	2.95914e-05	65	0.000417122	70	0.000115672	75	6.76948e-05	80	3.03272e-05	85	5.26685e-05	90	6.67958e-05	95	0.000210118	100	1.94721e-05	105	0.000130252	110	1.36516e-05	115	3.44255e-05	120	1.5121e-05	125
	5	3.94882e-05	10	0.000258408	15	0.000125761	20	2.46544e-05	25	2.71604e-05	30	2.73705e-05	35	2.57424e-05	40	2.47488e-05	45	2.8854e-05	50	7.7865e-05	55	4.70677e-05	60	3.68749e-05	65	4.7315e-05	70	6.74741e-05	75	0.000399891	80	5.88362e-05	85	4.9216e-05	90	8.01712e-05	95	2.23197e-05	100	3.12771e-05	105	7.08916e-05	110	6.63392e-05	115	4.84873e-05	120	1.85879e-05	125
	5	4.16656e-05	10	3.68177e-05	15	0.000127231	20	2.98979e-05	25	2.89565e-05	30	4.67853e-05	35	3.80705e-05	40	6.74601e-05	45	5.23507e-05	50	2.58886e-05	55	3.36529e-05	60	3.5987e-05	65	0.000731402	70	4.05016e-05	75	5.1032e-05	80	1.66061e-05	85	5.31226e-05	90	0.000142065	95	3.03283e-05	100	2.4491e-05	105	6.69648e-05	110	1.46175e-05	115	3.08007e-05	120	2.18985e-05	125
	5	4.77209e-05	10	3.32819e-05	15	2.9657e-05	20	4.92549e-05	25	6.45701e-05	30	5.96341e-05	35	2.02587e-05	40	8.76564e-05	45	7.62255e-05	50	1.35727e-05	55	3.10198e-05	60	4.10264e-05	65	5.77952e-05	70	3.98324e-05	75	5.42983e-05	80	3.47742e-05	85	5.64625e-05	90	6.38379e-05	95	0.000608426	100	1.91593e-05	105	2.67872e-05	110	6.13998e-05	115	5.82364e-05	120	1.55261e-05	125
	5	9.35149e-05	10	3.27732e-05	15	3.74026e-05	20	5.48251e-05	25	6.5554e-05	30	2.72044e-05	35	3.56352e-05	40	1.85887e-05	45	6.40696e-05	50	1.39036e-05	55	4.96839e-05	60	3.38906e-05	65	5.4191e-05	70	3.13116e-05	75	0.000941576	80	5.39717e-05	85	9.86242e-05	90	5.7413e-05	95	0.000656151	100	2.5809e-05	105	0.000171669	110	4.06465e-05	115	3.01654e-05	120	1.69871e-05	125
	5	5.86377e-05	10	3.97906e-05	15	0.000103898	20	2.28312e-05	25	3.07989e-05	30	2.72754e-05	35	4.5355e-05	40	2.45695e-05	45	3.36218e-05	50	1.47937e-05	55	0.000150434	60	3.76007e-05	65	0.00010296	70	4.58634e-05	75	6.989e-05	80	2.10602e-05	85	0.000101732	90	7.62609e-05	95	0.000167973	100	2.57042e-05	105	2.46403e-05	110	4.67246e-05	115	2.99547e-05	120	3.961e-05	125
	5	7.19846e-05	10	4.56375e-05	15	3.44379e-05	20	8.18234e-05	25	3.01656e-05	30	2.77167e-05	35	2.66764e-05	40	2.32988e-05	45	2.79948e-05	50	4.7915e-05	55	2.87532e-05	60	3.36506e-05	65	0.00016893	70	4.01742e-05	75	7.78723e-05	80	0.000276339	85	5.42683e-05	90	8.123e-05	95	2.86038e-05	100	7.53068e-05	105	2.31199e-05	110	1.44187e-05	115	3.41504e-05	120	1.55389e-05	125
	5	7.84302e-05	10	0.000149109	15	4.16548e-05	20	1.97085e-05	25	3.85059e-05	30	3.54636e-05	35	3.19252e-05	40	2.07161e-05	45	3.98911e-05	50	1.43639e-05	55	3.80384e-05	60	5.0735e-05	65	6.71803e-05	70	4.35393e-05	75	0.000266989	80	2.12578e-05	85	5.49835e-05	90	8.56738e-05	95	0.000266988	100	5.42714e-05	105	3.23218e-05	110	3.05203e-05	115	3.06197e-05	120	1.47868e-05	125
	5	3.93225e-05	10	0.000245473	15	5.6328e-05	20	5.0159e-05	25	4.37487e-05	30	2.8064e-05	35	2.83011e-05	40	6.3308e-05	45	4.52759e-05	50	1.54278e-05	55	2.75705e-05	60	2.83003e-05	65	0.000166046	70	4.92025e-05	75	4.6883e-05	80	0.000256318	85	4.64852e-05	90	0.00348657	95	5.99961e-05	100	1.91466e-05	105	2.8274e-05	110	1.68359e-05	115	2.99374e-05	120	4.38422e-05	125
	5	7.40546e-05	10	3.90529e-05	15	3e-05	20	2.10569e-05	25	0.000108287	30	2.88117e-05	35	4.94471e-05	40	4.58402e-05	45	2.78966e-05	50	1.86143e-05	55	2.77908e-05	60	6.07396e-05	65	0.000105501	70	4.19521e-05	75	0.000384791	80	2.76648e-05	85	6.35242e-05	90	0.00013805	95	2.27402e-05	100	2.26033e-05	105	3.39525e-05	110	2.08671e-05	115	0.00022029	120	1.75375e-05	125
	5	3.90353e-05	10	4.76196e-05	15	4.65038e-05	20	1.98755e-05	25	0.00016068	30	3.01264e-05	35	5.85324e-05	40	2.67793e-05	45	3.49223e-05	50	1.35052e-05	55	2.99845e-05	60	3.67425e-05	65	6.38714e-05	70	4.00763e-05	75	4.54029e-05	80	2.5589e-05	85	0.000117948	90	0.000103069	95	2.38596e-05	100	3.2351e-05	105	0.000102935	110	4.27456e-05	115	4.35899e-05	120	1.61782e-05	125
	5	4.13726e-05	10	6.57743e-05	15	3.147e-05	20	2.21318e-05	25	3.59938e-05	30	2.70461e-05	35	6.0465e-05	40	2.88197e-05	45	3.33222e-05	50	4.76425e-05	55	4.36469e-05	60	2.61417e-05	65	5.49403e-05	70	3.59202e-05	75	6.97118e-05	80	1.76766e-05	85	0.000117964	90	0.000131508	95	2.13344e-05	100	1.77094e-05	105	2.54633e-05	110	4.41032e-05	115	4.7856e-05	120	1.56381e-05	125
	5	0.000131074	10	5.08459e-05	15	2.98439e-05	20	2.45072e-05	25	3.71012e-05	30	2.79778e-05	35	2.92395e-05	40	2.33692e-05	45	3.06791e-05	50	1.35809e-05	55	3.39047e-05	60	3.24279e-05	65	5.01819e-05	70	4.68033e-05	75	0.000135831	80	2.2093e-05	85	0.000108054	90	0.000102129	95	2.47281e-05	100	1.66998e-05	105	3.66826e-05	110	1.8735e-05	115	0.000605782	120	0.000113365	125
	5	0.000553795	10	5.56023e-05	15	4.30595e-05	20	2.36453e-05	25	3.364e-05	30	3.01795e-05	35	2.48501e-05	40	2.67521e-05	45	2.98335e-05	50	1.9217e-05	55	5.00038e-05	60	7.13861e-05	65	8.39971e-05	70	3.34846e-05	75	9.90022e-05	80	0.000343401	85	4.5969e-05	90	0.000420392	95	2.46993e-05	100	3.76678e-05	105	2.32378e-05	110	2.90074e-05	115	4.77574e-05	120	2.48977e-05	125
	5	3.81918e-05	10	6.94068e-05	15	3.63668e-05	20	1.97691e-05	25	2.80445e-05	30	3.16472e-05	35	2.18163e-05	40	2.22492e-05	45	4.42204e-05	50	1.43496e-05	55	0.0015871	60	5.68936e-05	65	6.4071e-05	70	3.87294e-05	75	0.000103259	80	1.90688e-05	85	0.000279084	90	0.000183387	95	3.32475e-05	100	3.05288e-05	105	2.40748e-05	110	3.91875e-05	115	3.01067e-05	120	8.73389e-05	125
	5	3.70112e-05	10	3.89323e-05	15	5.27987e-05	20	5.39638e-05	25	2.86801e-05	30	3.25394e-05	35	0.000113967	40	2.44911e-05	45	4.48991e-05	50	5.41974e-05	55	0.00147637	60	6.1153e-05	65	4.71667e-05	70	3.98636e-05	75	0.00106082	80	3.03424e-05	85	7.91977e-05	90	0.000194208	95	3.06606e-05	100	3.38014e-05	105	2.74873e-05	110	1.7156e-05	115	3.37229e-05	120	2.03975e-05	125
	5	4.09452e-05	10	8.2289e-05	15	5.75818e-05	20	4.90894e-05	25	4.18922e-05	30	3.09028e-05	35	6.57167e-05	40	4.95535e-05	45	2.88641e-05	50	1.4758e-05	55	0.00588189	60	3.85984e-05	65	8.50259e-05	70	4.90253e-05	75	7.10661e-05	80	2.24886e-05	85	7.52311e-05	90	6.50751e-05	95	4.26722e-05	100	2.56449e-05	105	3.82032e-05	110	2.17215e-05	115	4.68017e-05	120	2.83083e-05	125
	5	4.1014e-05	10	8.33433e-05	15	3.23063e-05	20	3.9195e-05	25	5.48039e-05	30	3.10758e-05	35	3.88989e-05	40	2.81673e-05	45	4.06202e-05	50	1.30241e-05	55	6.21858e-05	60	6.06776e-05	65	0.000180287	70	3.19051e-05	75	7.18926e-05	80	1.82681e-05	85	8.29797e-05	90	5.98826e-05	95	2.40077e-05	100	3.58151e-05	105	0.000211639	110	4.31358e-05	115	3.84696e-05	120	1.86191e-05	125
	5	3.81872e-05	10	3.50824e-05	15	3.06286e-05	20	3.88205e-05	25	3.33829e-05	30	3.32956e-05	35	0.00023715	40	1.97586e-05	45	3.82533e-05	50	2.05486e-05	55	4.26849e-05	60	4.0097e-05	65	0.000244366	70	3.42122e-05	75	6.59237e-05	80	1.7197e-05	85	5.12771e-05	90	0.000106166	95	2.3023e-05	100	3.17649e-05	105	0.000261909	110	4.55113e-05	115	3.44271e-05	120	1.53736e-05	125
	5	5.06832e-05	10	3.25128e-05	15	3.49385e-05	20	2.64035e-05	25	3.96184e-05	30	2.9342e-05	35	0.000227645	40	3.37369e-05	45	2.84061e-05	50	1.36995e-05	55	3.16085e-05	60	3.67389e-05	65	4.73563e-05	70	3.46397e-05	75	4.17656e-05	80	2.69108e-05	85	5.16941e-05	90	9.02609e-05	95	3.53062e-05	100	3.81059e-05	105	2.32301e-05	110	1.65039e-05	115	3.05885e-05	120	1.56179e-05	125
	5	4.57612e-05	10	3.85823e-05	15	3.65404e-05	20	2.37621e-05	25	2.77965e-05	30	3.01403e-05	35	5.99334e-05	40	8.30714e-05	45	2.71295e-05	50	1.39198e-05	55	4.07378e-05	60	3.52943e-05	65	4.91458e-05	70	4.01796e-05	75	4.92058e-05	80	2.09504e-05	85	4.45703e-05	90	7.41413e-05	95	3.00733e-05	100	1.81912e-05	105	4.66806e-05	110	4.11736e-05	115	3.43845e-05	120	9.54642e-05	125
	5	3.91803e-05	10	5.47712e-05	15	5.46072e-05	20	3.04808e-05	25	9.31646e-05	30	3.19089e-05	35	2.68438e-05	40	3.24818e-05	45	3.32262e-05	50	1.4765e-05	55	3.7234e-05	60	2.75189e-05	65	0.00037405	70	0.000432025	75	0.000413182	80	1.87663e-05	85		90	6.48377e-05	95	4.24293e-05	100	2.7331e-05	105	2.46403e-05	110	0.000194206	115	3.45255e-05	120	1.52543e-05	125
	5	4.14731e-05	10	3.15225e-05	15	3.25023e-05	20	3.63379e-05	25	6.96791e-05	30	3.33792e-05	35	2.31379e-05	40	2.25316e-05	45	3.19936e-05	50	1.34662e-05	55	3.00422e-05	60	2.51426e-05	65	5.05365e-05	70	3.85747e-05	75	4.32005e-05	80	1.66933e-05	85		90	0.000102723	95	2.36737e-05	100	2.55003e-05	105	5.34912e-05	110	2.2755e-05	115	3.89767e-05	120	5.08807e-05	125
	5	7.39558e-05	10	4.66919e-05	15	4.17917e-05	20	3.95626e-05	25	3.32159e-05	30	2.79863e-05	35	4.69374e-05	40	6.78616e-05	45	4.95619e-05	50	1.5292e-05	55	3.46211e-05	60	3.979e-05	65	5.12819e-05	70	4.65663e-05	75	0.000331948	80	1.85672e-05	85		90	5.85528e-05	95	2.5725e-05	100	4.31239e-05	105	0.000131378	110	2.21431e-05	115	4.11495e-05	120	2.00901e-05	125
	5	0.000465932	10	0.000100198	15	4.30166e-05	20	3.20381e-05	25	2.67846e-05	30	3.6039e-05	35	2.25146e-05	40	4.04796e-05	45	4.83495e-05	50	1.31135e-05	55	2.72303e-05	60	2.72922e-05	65	4.85468e-05	70	4.77579e-05	75	6.81976e-05	80	0.000501167	85		90	7.18995e-05	95	2.41598e-05	100	1.9626e-05	105	3.71396e-05	110	2.98791e-05	115	4.45056e-05	120	1.44069e-05	125
	5	4.41243e-05	10	9.24464e-05	15	3.05418e-05	20	3.65692e-05	25	3.93494e-05	30	2.70424e-05	35	4.99767e-05	40	1.91408e-05	45	3.13384e-05	50	4.55642e-05	55	2.7673e-05	60	4.67277e-05	65	8.75659e-05	70	3.28819e-05	75	0.0002124	80	2.86612e-05	85		90	6.61244e-05	95	2.56407e-05	100	2.35814e-05	105	3.75065e-05	110	2.08923e-05	115	3.13164e-05	120	1.35628e-05	125
	5	5.48804e-05	10	8.816e-05	15	7.52241e-05	20	3.21287e-05	25	2.9483e-05	30	2.95363e-05	35	8.8148e-05	40	1.97243e-05	45	4.02184e-05	50	1.34466e-05	55	3.33196e-05	60	2.9753e-05	65	0.000261466	70	4.21278e-05	75	3.95504e-05	80	4.54758e-05	85		90	0.000279937	95	2.30319e-05	100	6.91937e-05	105	2.28612e-05	110	1.93874e-05	115	3.84731e-05	120	1.72966e-05	125
	5	3.92746e-05	10	9.49554e-05	15	9.12515e-05	20	2.37124e-05	25	2.79194e-05	30	6.76187e-05	35	2.69816e-05	40	3.04368e-05	45	2.76278e-05	50	3.01833e-05	55	2.74074e-05	60	8.71024e-05	65	0.000151183	70	4.98619e-05	75	8.60932e-05	80	2.94304e-05	85		90	6.32828e-05	95	2.49431e-05	100	2.4429e-05	105	2.58899e-05	110	2.01995e-05	115	4.10932e-05	120	5.78598e-05	125
	5	7.27751e-05	10	8.4208e-05	15	5.33393e-05	20	2.08883e-05	25	3.38604e-05	30	9.5299e-05	35	2.2809e-05	40	0.0608823	45	3.43509e-05	50	1.68399e-05	55	3.32377e-05	60	5.38229e-05	65	9.41834e-05	70	5.10026e-05	75	0.000101172	80	2.86834e-05	85		90	5.84296e-05	95	3.39787e-05	100	3.69318e-05	105	2.07812e-05	110	0.000117359	115	4.52217e-05	120	1.47158e-05	125
	5	7.54953e-05	10	7.43425e-05	15	3.79856e-05	20	5.37036e-05	25	0.000385056	30	0.00011589	35	2.68908e-05	40	1.92715e-05	45	2.74351e-05	50	1.61498e-05	55	3.10955e-05	60	2.59764e-05	65	7.85738e-05	70	7.59796e-05	75	3.75064e-05	80	2.31244e-05	85		90	5.86962e-05	95	3.05023e-05	100	2.53797e-05	105	2.04671e-05	110	5.28262e-05	115	4.38708e-05	120	1.55574e-05	125
	5	4.28608e-05	10	3.64616e-05	15	3.32739e-05	20	2.0943e-05	25	3.18332e-05	30	7.37817e-05	35	2.85855e-05	40	5.77695e-05	45	5.43836e-05	50	1.49284e-05	55	3.3386e-05	60	2.70045e-05	65	6.37458e-05	70	7.49651e-05	75	0.00162735	80	0.000114439	85		90	0.000120175	95	2.24074e-05	100	1.84703e-05	105	0.000283955	110	8.50299e-05	115	3.51478e-05	120	1.6554e-05	125
	5	3.60497e-05	10	4.35058e-05	15	4.25241e-05	20	2.29497e-05	25	5.12751e-05	30	2.97905e-05	35	0.000396672	40	4.19739e-05	45	2.86615e-05	50	1.47273e-05	55	2.89356e-05	60	2.87456e-05	65	0.000167102	70	6.25828e-05	75	0.00179959	80	4.58567e-05	85		90	0.000108833	95	2.97651e-05	100	2.8112e-05	105	4.40223e-05	110	2.55723e-05	115	3.25489e-05	120	1.35667e-05	125
	5	8.62451e-05	10	3.2327e-05	15	0.000160222	20	2.28791e-05	25	2.87985e-05	30	3.08551e-05	35	5.60364e-05	40	3.45719e-05	45	4.27786e-05	50	1.37889e-05	55	9.72609e-05	60	6.16345e-05	65	0.000145614	70		75	7.32217e-05	80	3.33439e-05	85		90	7.56462e-05	95	3.70113e-05	100	2.44364e-05	105	3.38952e-05	110	2.75938e-05	115	3.98291e-05	120	1.60269e-05	125
	5	9.72864e-05	10	3.81638e-05	15	0.000183129	20	2.24391e-05	25	2.77069e-05	30	2.8797e-05	35	9.96897e-05	40	2.81366e-05	45	3.37682e-05	50	1.67982e-05	55	3.48841e-05	60	6.62719e-05	65	7.70353e-05	70		75	4.78629e-05	80	3.94548e-05	85		90	0.000107654	95	8.67947e-05	100	1.84217e-05	105	2.18409e-05	110	1.2895e-05	115	4.22405e-05	120	1.3942e-05	125
	5	9.83359e-05	10	3.78899e-05	15	3.10673e-05	20	2.16819e-05	25	3.17594e-05	30	0.00017146	35	9.8373e-05	40	3.08436e-05	45	8.00163e-05	50	1.47688e-05	55	4.60067e-05	60	4.86999e-05	65	9.01325e-05	70		75	0.00660601	80	3.01525e-05	85		90	5.43082e-05	95	0.000131175	100	2.03146e-05	105	4.22448e-05	110	1.92286e-05	115	5.14772e-05	120	4.40069e-05	125
	5	0.000122253	10	3.54012e-05	15	3.3177e-05	20	4.37496e-05	25	3.74565e-05	30	0.000195487	35	2.87709e-05	40	2.86392e-05	45	3.42893e-05	50	2.08907e-05	55	3.56802e-05	60	3.06518e-05	65	0.000546478	70		75	7.33981e-05	80	0.000220771	85		90	7.99767e-05	95	2.23994e-05	100	2.9378e-05	105	0.000239886	110	9.3329e-05	115	4.84785e-05	120	1.9403e-05	125
	5	4.41676e-05	10	5.81606e-05	15	3.17114e-05	20	3.20404e-05	25	2.77768e-05	30	3.11084e-05	35	2.79179e-05	40	2.64725e-05	45	4.56092e-05	50	1.51565e-05	55	3.18615e-05	60	3.05221e-05	65	0.000239363	70		75	4.79213e-05	80	8.84848e-05	85		90	0.000360462	95	4.13718e-05	100	2.49267e-05	105	0.000189206	110	4.17644e-05	115	8.5093e-05	120	1.54907e-05	125
	5	0.000149319	10	6.44358e-05	15	3.45471e-05	20	2.33289e-05	25	3.54408e-05	30	2.96966e-05	35	3.28354e-05	40	2.37232e-05	45	7.62797e-05	50	1.38955e-05	55	4.00965e-05	60	3.24257e-05	65	0.00013357	70		75	5.34682e-05	80	2.49412e-05	85		90	0.000326156	95	4.58707e-05	100	1.85669e-05	105	0.000313849	110	1.37938e-05	115	3.34046e-05	120	1.90384e-05	125
	5	0.000209675	10	4.82089e-05	15	3.76746e-05	20	2.36635e-05	25	4.19963e-05	30	3.69278e-05	35	2.43363e-05	40	2.16958e-05	45	4.4126e-05	50	1.40978e-05	55	3.69792e-05	60	0.00015866	65	7.54965e-05	70		75	0.000776328	80	4.96934e-05	85		90	9.54394e-05	95	0.000191035	100	4.53556e-05	105	2.70729e-05	110	3.35621e-05	115	5.33915e-05	120	2.23465e-05	125
	5	0.000352531	10	4.77973e-05	15	3.87239e-05	20	8.17149e-05	25	3.27482e-05	30	2.85035e-05	35	2.25001e-05	40	1.85417e-05	45	0.000679277	50	1.47623e-05	55	2.98154e-05	60	3.13652e-05	65	7.39643e-05	70		75	4.46388e-05	80	0.000237659	85		90	0.00010719	95	0.000543261	100	2.32324e-05	105	0.00035931	110	2.43765e-05	115	4.24738e-05	120	3.67203e-05	125
	5	0.000152161	10	3.88547e-05	15	4.11382e-05	20	8.12367e-05	25	0.000137495	30	2.8039e-05	35	4.65769e-05	40	4.92781e-05	45	2.97793e-05	50	1.45579e-05	55	3.6135e-05	60	4.04381e-05	65	0.000142198	70		75	0.000681535	80	8.16075e-05	85		90	7.22192e-05	95	2.18285e-05	100	2.47826e-05	105	2.38503e-05	110	1.57316e-05	115	3.81132e-05	120	3.20813e-05	125
	5	4.61077e-05	10	3.21863e-05	15	5.5944e-05	20	3.89505e-05	25	2.88152e-05	30	4.47171e-05	35	2.86804e-05	40	2.56932e-05	45	9.46771e-05	50	1.3992e-05	55	3.95652e-05	60	7.44137e-05	65	6.41832e-05	70		75	8.20344e-05	80	0.000368129	85		90	6.98761e-05	95	3.88525e-05	100	3.71045e-05	105	2.79851e-05	110	2.11095e-05	115	3.61854e-05	120	1.43065e-05	125
	5	7.89291e-05	10	3.66223e-05	15	7.52998e-05	20	4.476e-05	25	3.89979e-05	30	4.19252e-05	35	3.41216e-05	40	2.34777e-05	45	0.000172442	50	1.64068e-05	55	0.000119331	60	3.6074e-05	65	8.345e-05	70		75	8.78021e-05	80	1.63791e-05	85		90	0.000133814	95	5.07048e-05	100	2.06377e-05	105	6.21704e-05	110	5.00617e-05	115	3.42989e-05	120	1.50912e-05	125
	5	4.02664e-05	10	3.39248e-05	15	3.29185e-05	20	2.08603e-05	25	6.97743e-05	30	5.57661e-05	35	2.76689e-05	40	4.62962e-05	45	5.28671e-05	50	1.32662e-05	55	0.000113926	60	4.22368e-05	65	7.02128e-05	70		75	7.80628e-05	80	3.13862e-05	85		90	0.000151147	95	2.15006e-05	100	3.64356e-05	105	4.35978e-05	110	1.35559e-05	115	3.49674e-05	120	2.04607e-05	125
	5	4.2796e-05	10	3.59116e-05	15	3.58461e-05	20	2.26975e-05	25	5.92919e-05	30	3.08599e-05	35	6.96701e-05	40	2.2045e-05	45	2.93831e-05	50	1.68678e-05	55	2.76052e-05	60	2.76382e-05	65	5.77553e-05	70		75	6.31454e-05	80	1.74744e-05	85		90	6.9201e-05	95	2.42494e-05	100	3.95403e-05	105	2.17272e-05	110	2.33721e-05	115	4.50611e-05	120	1.36165e-05	125
	5	4.01458e-05	10	3.17686e-05	15	3.4154e-05	20	3.20614e-05	25	4.83351e-05	30	2.775e-05	35	2.28372e-05	40	0.000271304	45	5.3267e-05	50	1.68791e-05	55	3.83807e-05	60	3.12747e-05	65	5.52588e-05	70		75	4.17631e-05	80	1.88336e-05	85		90	5.95451e-05	95	4.09861e-05	100	1.72479e-05	105	2.23417e-05	110	1.42504e-05	115	0.000106299	120	1.44834e-05	125
	5	5.94759e-05	10	5.31055e-05	15	4.14594e-05	20	2.82204e-05	25	2.82768e-05	30	4.94654e-05	35	3.67299e-05	40	3.32142e-05	45	5.62615e-05	50	1.33128e-05	55	5.0614e-05	60	0.000624376	65	0.000187618	70		75	3.94606e-05	80	4.77192e-05	85		90	6.97418e-05	95	0.000115401	100	2.09993e-05	105	4.30659e-05	110	3.1994e-05	115	3.95704e-05	120	3.14039e-05	125
	5	6.79334e-05	10	7.75601e-05	15	5.25943e-05	20	2.68209e-05	25	3.07489e-05	30	2.84326e-05	35	2.16971e-05	40	3.02348e-05	45	4.34984e-05	50	1.50332e-05	55	2.79333e-05	60	2.85578e-05	65	0.000188142	70		75	3.96836e-05	80	1.80587e-05	85		90	9.54744e-05	95	2.15278e-05	100	1.95415e-05	105	0.000201765	110	1.46854e-05	115	3.6088e-05	120	3.5717e-05	125
	5	4.9057e-05	10	5.4989e-05	15	4.1672e-05	20	2.47276e-05	25	5.1968e-05	30	2.752e-05	35	2.26574e-05	40	2.57582e-05	45	3.00665e-05	50	1.58868e-05	55	3.79809e-05	60	5.37956e-05	65	0.00036465	70		75	3.74196e-05	80	1.87857e-05	85		90	8.31768e-05	95	2.58735e-05	100	2.43333e-05	105	2.28761e-05	110	2.65775e-05	115	3.89084e-05	120	2.91802e-05	125
	5	4.13967e-05	10	3.90001e-05	15	4.78511e-05	20	7.79757e-05	25	2.60227e-05	30		35	3.70226e-05	40	2.08036e-05	45	7.95269e-05	50	2.82593e-05	55	3.98428e-05	60	4.06787e-05	65	5.14637e-05	70		75	7.0164e-05	80	1.61289e-05	85		90	8.56373e-05	95	6.8683e-05	100	3.03568e-05	105	2.03493e-05	110	1.26317e-05	115	3.25286e-05	120	1.53095e-05	125
	5	5.19823e-05	10	4.55233e-05	15	4.61966e-05	20	2.22745e-05	25	2.65122e-05	30		35	0.000209943	40	4.3943e-05	45	3.2859e-05	50	1.34269e-05	55	3.14889e-05	60	2.51341e-05	65	7.1431e-05	70		75	3.73312e-05	80	2.69272e-05	85		90	7.57293e-05	95	2.30021e-05	100	2.97417e-05	105	2.1604e-05	110	2.35296e-05	115	3.63544e-05	120	1.61427e-05	125
	5	5.94684e-05	10	3.54815e-05	15	0.000201369	20	2.68571e-05	25	2.95228e-05	30		35	2.13108e-05	40	4.82773e-05	45	2.81079e-05	50	1.444e-05	55	2.89267e-05	60	6.03788e-05	65	6.38254e-05	70		75	5.48267e-05	80	0.000513282	85		90	0.000121717	95	2.7246e-05	100	3.21893e-05	105	1.95459e-05	110	1.44336e-05	115	5.08294e-05	120	1.62132e-05	125
	5	3.79111e-05	10	3.42101e-05	15	0.000191848	20	3.02346e-05	25	2.77736e-05	30		35	2.87008e-05	40	6.04737e-05	45	3.05178e-05	50	5.26384e-05	55	3.01704e-05	60	4.78413e-05	65	0.000227696	70		75	4.37117e-05	80	0.00055233	85		90	9.58758e-05	95	2.45172e-05	100	2.10662e-05	105	1.97854e-05	110	2.06165e-05	115	5.81888e-05	120	7.47205e-05	125
	5	4.53437e-05	10	3.30288e-05	15	3.01394e-05	20	2.07376e-05	25	3.40398e-05	30		35	2.15143e-05	40	4.18654e-05	45	4.00353e-05	50	5.97634e-05	55	4.71462e-05	60	2.65429e-05	65	0.000146432	70		75	3.92468e-05	80	1.66131e-05	85		90	9.37688e-05	95	2.23094e-05	100	1.82224e-05	105	2.25451e-05	110	8.96622e-05	115	3.44781e-05	120	1.46928e-05	125
	5	5.02625e-05	10	3.99631e-05	15	3.5605e-05	20	2.58611e-05	25	3.14156e-05	30		35	2.74691e-05	40	3.62363e-05	45	3.40995e-05	50	4.7946e-05	55	2.88629e-05	60	2.55107e-05	65	6.0207e-05	70		75	6.43652e-05	80	2.44128e-05	85		90	8.24895e-05	95	2.70532e-05	100	1.78799e-05	105	3.07154e-05	110	3.35075e-05	115	2.95552e-05	120	3.17728e-05	125
	5	5.19981e-05	10	4.14867e-05	15	2.99175e-05	20	9.67704e-05	25	2.86517e-05	30		35	3.47519e-05	40	2.42981e-05	45	5.13517e-05	50	1.37579e-05	55	2.93558e-05	60	4.15958e-05	65	0.00012501	70		75	4.48099e-05	80	2.40786e-05	85		90	7.77267e-05	95	2.57962e-05	100	2.73999e-05	105	0.000405034	110	6.3362e-05	115	3.23297e-05	120	3.98834e-05	125
	5	6.10146e-05	10	5.08911e-05	15	4.14618e-05	20	2.33688e-05	25	3.3958e-05	30		35	8.22916e-05	40	3.11356e-05	45	3.51501e-05	50	1.61026e-05	55	3.91158e-05	60	7.09662e-05	65	0.000179603	70		75	5.80044e-05	80	7.99428e-05	85		90	7.59716e-05	95	0.000106776	100	1.94079e-05	105	2.31552e-05	110	5.208e-05	115	4.6261e-05	120	2.34549e-05	125
	5	6.28686e-05	10	4.83431e-05	15	6.32291e-05	20	2.41684e-05	25	2.91371e-05	30		35	4.09331e-05	40	2.10951e-05	45	3.34501e-05	50	1.74932e-05	55	5.24274e-05	60	4.46906e-05	65	0.000951501	70		75	4.91086e-05	80	1.65216e-05	85		90	9.6614e-05	95	2.46808e-05	100	2.21408e-05	105	5.56836e-05	110	6.24579e-05	115	3.86852e-05	120	1.66244e-05	125
	5	4.109e-05	10	3.90931e-05	15	3.42198e-05	20	7.13587e-05	25	3.73997e-05	30		35	4.21319e-05	40	2.09977e-05	45	2.85266e-05	50	1.44642e-05	55	3.65943e-05	60	4.71715e-05	65	5.2415e-05	70		75	6.11553e-05	80	2.19921e-05	85		90	9.32109e-05	95	3.6729e-05	100	1.90828e-05	105	0.000117007	110	4.85907e-05	115	3.88728e-05	120	1.51134e-05	125
	5	5.6092e-05	10	3.50014e-05	15	0.000591725	20	9.43416e-05	25	3.00839e-05	30		35	2.36008e-05	40	4.10667e-05	45	4.66425e-05	50	1.51245e-05	55	3.02198e-05	60	3.82408e-05	65	4.70451e-05	70		75	0.000101225	80	3.53724e-05	85		90	8.3797e-05	95	2.94054e-05	100	2.33945e-05	105	2.01725e-05	110	3.21779e-05	115	5.11987e-05	120	6.45677e-05	125
	5	3.79923e-05	10	3.95101e-05	15	5.38959e-05	20	2.72389e-05	25	2.93933e-05	30		35	2.0869e-05	40	5.55354e-05	45	5.61688e-05	50	1.45749e-05	55	2.78687e-05	60	4.13914e-05	65	0.000100327	70		75	9.12277e-05	80	1.74644e-05	85		90	0.000129821	95	2.73343e-05	100	2.10946e-05	105	2.18149e-05	110	4.66655e-05	115	3.15024e-05	120	1.42717e-05	125
	5	4.10645e-05	10	4.48126e-05	15	8.86517e-05	20	2.85792e-05	25	0.000114373	30		35	0.000127677	40	3.53595e-05	45	8.22728e-05	50	1.63346e-05	55	3.52205e-05	60	2.5465e-05	65	7.79771e-05	70		75	0.000194087	80	5.33007e-05	85		90	9.12028e-05	95	2.10391e-05	100	1.92893e-05	105	0.000769268	110	5.93705e-05	115	3.92188e-05	120	1.6489e-05	125
	5	3.78864e-05	10	4.49414e-05	15	0.000100315	20	2.17732e-05	25	8.3167e-05	30		35	2.20412e-05	40	1.93371e-05	45	4.40403e-05	50	1.32197e-05	55	3.61497e-05	60	3.88604e-05	65	8.85111e-05	70		75	0.000471687	80	2.6917e-05	85		90	7.45106e-05	95	6.85977e-05	100	2.40354e-05	105	7.08126e-05	110	1.6015e-05	115	3.73635e-05	120	1.67008e-05	125
	5	0.000130233	10	4.47237e-05	15	0.000104558	20	2.47784e-05	25	2.60694e-05	30		35	4.28419e-05	40	2.44285e-05	45	8.33767e-05	50	1.43656e-05	55	3.17798e-05	60	3.59816e-05	65	0.000352072	70		75	0.000159748	80	2.72094e-05	85		90	9.85759e-05	95	4.17375e-05	100	1.67868e-05	105	4.55755e-05	110	4.61471e-05	115	3.23119e-05	120	7.35935e-05	125
	5	0.000142073	10	3.52911e-05	15	0.000130549	20		25	4.68446e-05	30		35	4.23075e-05	40	2.6401e-05	45	3.85912e-05	50	1.5612e-05	55	2.96614e-05	60	3.77742e-05	65	0.000254356	70		75	3.96508e-05	80	2.11382e-05	85		90	6.11242e-05	95	3.32188e-05	100	4.34009e-05	105	2.51961e-05	110	1.51448e-05	115	0.000149265	120	1.51449e-05	125
	5	5.62465e-05	10	3.40076e-05	15	4.37916e-05	20		25	6.75303e-05	30		35	0.000169053	40	2.98483e-05	45	3.11174e-05	50	1.41564e-05	55	5.95537e-05	60	0.00016053	65	0.000516073	70		75	6.15601e-05	80	0.000119904	85		90	5.95582e-05	95	2.17633e-05	100	5.69375e-05	105	1.96747e-05	110	5.53366e-05	115	3.36892e-05	120	1.49343e-05	125
	5	4.61355e-05	10	3.71403e-05	15	3.02776e-05	20		25	7.44955e-05	30		35	2.4676e-05	40	2.10398e-05	45	2.76908e-05	50	1.77809e-05	55	3.28414e-05	60	2.69107e-05	65	0.000270629	70		75	7.95386e-05	80	0.000156982	85		90	0.000145714	95	2.0924e-05	100	2.0277e-05	105	2.16155e-05	110	1.21738e-05	115	2.95271e-05	120	1.53691e-05	125
	5	4.58834e-05	10	4.27964e-05	15	2.95606e-05	20		25	2.61829e-05	30		35	2.83565e-05	40	3.62872e-05	45	4.55165e-05	50	2.09069e-05	55	3.49414e-05	60	4.67947e-05	65	0.000128783	70		75	5.08742e-05	80	4.12911e-05	85		90	0.000153496	95	2.78485e-05	100	2.73258e-05	105	0.00103355	110	2.47749e-05	115	3.06324e-05	120	2.03474e-05	125
	5	0.00191411	10	6.24683e-05	15	4.70551e-05	20		25	4.30923e-05	30		35	2.22004e-05	40	4.31011e-05	45	7.63284e-05	50	2.81442e-05	55	3.44659e-05	60	4.69465e-05	65	0.000371268	70		75	4.37372e-05	80	2.1646e-05	85		90	6.38821e-05	95	2.29687e-05	100	1.7258e-05	105	0.000245136	110	8.37072e-05	115	2.99627e-05	120	1.66229e-05	125
	5	0.000102149	10	5.15613e-05	15	6.30787e-05	20		25	2.93145e-05	30		35	2.01119e-05	40	3.48181e-05	45	8.92349e-05	50	3.35661e-05	55	2.71809e-05	60	4.28949e-05	65	0.000197492	70		75	0.000116012	80	3.98983e-05	85		90	6.11784e-05	95	2.56502e-05	100	4.38192e-05	105	2.04239e-05	110	2.01941e-05	115	3.62582e-05	120	2.97353e-05	125
	5	4.22131e-05	10	5.22658e-05	15	5.21638e-05	20		25	2.84709e-05	30		35	2.1719e-05	40	2.265e-05	45	3.09097e-05	50	1.69373e-05	55	0.000143178	60	4.04091e-05	65	0.000136013	70		75	3.76951e-05	80	2.98601e-05	85		90	8.9366e-05	95	4.05294e-05	100	3.76829e-05	105	2.7753e-05	110	0.00019952	115	4.49554e-05	120	1.49187e-05	125
	5	4.80132e-05	10	3.98792e-05	15	3.01915e-05	20		25	2.9546e-05	30		35	4.01203e-05	40	3.29851e-05	45	4.66114e-05	50	1.8475e-05	55	2.77568e-05	60	5.46358e-05	65	0.000221342	70		75	0.000194002	80	1.96586e-05	85		90	5.78004e-05	95	0.000136276	100	5.11256e-05	105	2.73608e-05	110	1.73209e-05	115	5.07548e-05	120	1.71676e-05	125
	5	3.93113e-05	10	5.45585e-05	15	3.02147e-05	20		25	2.8712e-05	30		35	0.00020307	40	3.63911e-05	45	3.80202e-05	50	1.32429e-05	55	3.30159e-05	60	3.53723e-05	65	0.000114192	70		75	7.23161e-05	80	8.52126e-05	85		90	5.38782e-05	95	5.80403e-05	100	2.17938e-05	105	2.11142e-05	110	2.34114e-05	115	3.71966e-05	120	1.59945e-05	125
	5	4.50467e-05	10	6.25716e-05	15	3.37772e-05	20		25	3.70822e-05	30		35	0.000100017	40	1.91336e-05	45	3.42851e-05	50	1.32648e-05	55	3.85102e-05	60	3.7568e-05	65	0.000109926	70		75	6.95837e-05	80	5.78941e-05	85		90	5.47947e-05	95	2.68783e-05	100	2.88897e-05	105	2.27526e-05	110	2.14787e-05	115	4.08699e-05	120	2.19448e-05	125
	5	7.77808e-05	10	6.42231e-05	15	4.86872e-05	20		25	4.94243e-05	30		35	2.17131e-05	40	2.74683e-05	45	4.38881e-05	50	1.33238e-05	55	4.39685e-05	60	3.55715e-05	65	0.000132408	70		75	5.83623e-05	80	0.000133576	85		90	0.000136583	95	3.66108e-05	100	3.11703e-05	105	2.69426e-05	110	2.61542e-05	115	4.78453e-05	120	1.64419e-05	125
	5	3.89081e-05	10	6.00255e-05	15	6.55722e-05	20		25	3.2612e-05	30		35	2.89908e-05	40	2.01645e-05	45	5.44388e-05	50	1.32425e-05	55	0.00130499	60	7.90811e-05	65	8.88704e-05	70		75	4.70707e-05	80	0.000220577	85		90	0.000190243	95	2.92424e-05	100	3.13441e-05	105	9.30649e-05	110	1.89647e-05	115	3.65795e-05	120	1.36889e-05	125
	5	0.000102119	10	7.01984e-05	15	4.93291e-05	20		25	3.39832e-05	30		35	5.04988e-05	40	3.25e-05	45	6.34497e-05	50	1.7162e-05	55	2.79836e-05	60	6.96191e-05	65	5.72245e-05	70		75	4.79087e-05	80	0.000161703	85		90	6.47361e-05	95	3.00912e-05	100	2.30105e-05	105	2.23911e-05	110	1.36428e-05	115	3.52388e-05	120	1.48455e-05	125
	5	3.89018e-05	10	6.42103e-05	15	0.000487487	20		25	3.57741e-05	30		35	2.25826e-05	40	3.37459e-05	45	6.90288e-05	50	1.72029e-05	55	0.000168021	60	4.42745e-05	65	6.31138e-05	70		75	0.00010042	80	1.64793e-05	85		90	7.86483e-05	95	4.95686e-05	100	1.86216e-05	105	0.000124623	110	4.98032e-05	115	3.47351e-05	120	1.84934e-05	125
	5	5.57414e-05	10	4.31121e-05	15	3.17292e-05	20		25	3.98009e-05	30		35	2.04487e-05	40	2.57505e-05	45	6.74872e-05	50	1.59831e-05	55	2.86658e-05	60	3.79155e-05	65	0.00017463	70		75	0.000151607	80	5.73784e-05	85		90	0.000104456	95	2.23743e-05	100	2.02456e-05	105	3.04003e-05	110	2.86557e-05	115	4.28807e-05	120	1.41719e-05	125
	5	5.45141e-05	10	3.31785e-05	15	3.11389e-05	20		25	3.78562e-05	30		35	2.03459e-05	40	3.28923e-05	45	4.32669e-05	50	1.34753e-05	55	2.77376e-05	60	3.21352e-05	65	0.000106763	70		75	6.42992e-05	80	4.85477e-05	85		90	0.00011379	95	2.30933e-05	100	2.3273e-05	105	3.01968e-05	110	2.57774e-05	115	3.06494e-05	120	2.43529e-05	125
	5	7.05577e-05	10	3.41742e-05	15	3.285e-05	20		25	3.80165e-05	30		35	9.72149e-05	40	2.72246e-05	45	3.82578e-05	50	1.32804e-05	55	3.27994e-05	60	4.02766e-05	65	9.45e-05	70		75	5.78154e-05	80	3.35677e-05	85		90	0.00013849	95	2.13681e-05	100	2.09447e-05	105	2.64851e-05	110	3.62691e-05	115	3.90324e-05	120	3.5014e-05	125
	5	0.000142584	10	3.38257e-05	15	4.64948e-05	20		25	2.86384e-05	30		35	9.93896e-05	40	2.02966e-05	45	3.18177e-05	50	1.77658e-05	55	4.74505e-05	60	0.000177023	65	5.28683e-05	70		75	4.22662e-05	80	2.60154e-05	85		90	7.29188e-05	95	2.37599e-05	100	3.43425e-05	105	3.61944e-05	110	1.38821e-05	115	3.48408e-05	120	2.72259e-05	125
	5	0.000135676	10	3.48497e-05	15	3.21523e-05	20		25	3.30266e-05	30		35	4.86912e-05	40	2.28089e-05	45	2.68953e-05	50	1.69641e-05	55	5.38005e-05	60	3.85255e-05	65	5.19653e-05	70		75	4.67524e-05	80	3.7435e-05	85		90	9.99655e-05	95	2.65259e-05	100	1.95088e-05	105	3.62377e-05	110	1.58661e-05	115	3.15339e-05	120	1.62661e-05	125
	5	3.6003e-05	10	3.48319e-05	15	3.51317e-05	20		25	3.97129e-05	30		35	3.55833e-05	40	3.41314e-05	45	3.77081e-05	50	3.05165e-05	55	5.90766e-05	60	5.06466e-05	65	5.5911e-05	70		75	6.43954e-05	80	5.59323e-05	85		90	0.000110195	95	4.11286e-05	100	3.25889e-05	105	2.37219e-05	110	1.63759e-05	115	3.12503e-05	120	1.58267e-05	125
	5	6.72727e-05	10	4.35498e-05	15	4.78456e-05	20		25	3.38509e-05	30		35	2.48077e-05	40	2.85386e-05	45	3.52142e-05	50	7.22992e-05	55	2.8639e-05	60	4.12497e-05	65	6.58884e-05	70		75	6.93927e-05	80	4.58454e-05	85		90	5.44082e-05	95	3.23595e-05	100	2.93083e-05	105	2.16064e-05	110	2.18056e-05	115	7.61726e-05	120	1.46585e-05	125
	5	4.6611e-05	10	4.09239e-05	15	8.01602e-05	20		25	5.85802e-05	30		35	2.68349e-05	40	2.2547e-05	45	4.24857e-05	50	1.37003e-05	55	3.29474e-05	60	3.22921e-05	65	0.000383694	70		75	6.89946e-05	80	0.000129569	85		90	6.45898e-05	95	3.09465e-05	100	1.70509e-05	105	2.02003e-05	110	1.21481e-05	115	3.50679e-05	120	1.7218e-05	125
	5	0.000150612	10	6.70652e-05	15	5.8223e-05	20		25	6.8842e-05	30		35	2.43498e-05	40	2.00056e-05	45	4.52887e-05	50	1.75487e-05	55	3.28585e-05	60	5.98347e-05	65	5.68683e-05	70		75	5.66163e-05	80	1.93932e-05	85		90	9.43735e-05	95	2.12857e-05	100	1.66977e-05	105	2.29242e-05	110	0.00010309	115	3.58633e-05	120	1.40319e-05	125
	5	3.74957e-05	10	6.23647e-05	15	4.19591e-05	20		25	0.000103112	30		35	2.1784e-05	40	3.52976e-05	45	6.40934e-05	50	3.05816e-05	55	3.34891e-05	60	3.18072e-05	65	0.000360572	70		75	4.07928e-05	80	1.75916e-05	85		90	0.000178697	95	3.31236e-05	100	3.7732e-05	105	2.52647e-05	110	4.85307e-05	115	4.25498e-05	120	3.57234e-05	125
	5	4.26017e-05	10	3.52981e-05	15	3.9811e-05	20		25	8.84046e-05	30		35	2.57735e-05	40	6.45005e-05	45	3.2251e-05	50	1.34025e-05	55	4.57092e-05	60	3.77584e-05	65	9.31582e-05	70		75	3.86511e-05	80	3.44789e-05	85		90	0.000133314	95	2.33361e-05	100	1.80207e-05	105	3.37848e-05	110	1.95337e-05	115	9.8443e-05	120	1.88354e-05	125
	5	4.61337e-05	10	3.72434e-05	15	3.5254e-05	20		25	6.36649e-05	30		35	6.05307e-05	40	2.68961e-05	45	3.00058e-05	50	2.56519e-05	55	3.71843e-05	60	2.53456e-05	65	7.64241e-05	70		75	5.22589e-05	80	0.000159124	85		90	5.61261e-05	95	2.78103e-05	100	1.76887e-05	105	2.88079e-05	110	4.95024e-05	115	7.96393e-05	120	2.41569e-05	125
	5	7.12103e-05	10	0.000288958	15	5.22872e-05	20		25	5.42311e-05	30		35	3.26449e-05	40	2.66253e-05	45	4.65831e-05	50	2.69661e-05	55	2.85855e-05	60	4.48922e-05	65	7.62676e-05	70		75	0.000157462	80	8.83777e-05	85		90	6.54344e-05	95	4.23917e-05	100	1.89379e-05	105	2.3101e-05	110	7.69583e-05	115	3.42401e-05	120	1.41803e-05	125
	5	0.000230835	10	0.000299057	15	7.16919e-05	20		25	7.00265e-05	30		35	2.19864e-05	40	3.5942e-05	45	4.3961e-05	50	1.62998e-05	55	3.89832e-05	60	2.55887e-05	65	9.34401e-05	70		75	0.000507242	80	3.76586e-05	85		90	5.32316e-05	95	2.60872e-05	100	1.73827e-05	105	3.42576e-05	110	4.79958e-05	115	3.39374e-05	120	1.39421e-05	125
	5	0.000196396	10	3.38004e-05	15	6.546e-05	20		25	5.76663e-05	30		35	5.11815e-05	40	4.74368e-05	45	4.60384e-05	50	1.32938e-05	55	2.95074e-05	60	3.01297e-05	65	0.000262356	70		75	4.43842e-05	80	1.85615e-05	85		90	0.000337609	95	2.07681e-05	100	3.18842e-05	105	7.55381e-05	110	0.000103097	115	3.58022e-05	120	2.07755e-05	125
	5	5.25749e-05	10	4.21971e-05	15	4.83093e-05	20		25	2.85291e-05	30		35	2.42754e-05	40	4.69625e-05	45	3.42595e-05	50	1.63537e-05	55	3.18312e-05	60	2.714e-05	65	9.72107e-05	70		75	0.000143506	80	4.4144e-05	85		90	8.76416e-05	95	2.09591e-05	100	2.07651e-05	105	9.52502e-05	110	8.48724e-05	115	3.84471e-05	120	2.9961e-05	125
	5	5.27644e-05	10	0.000131916	15	3.33487e-05	20		25	4.66155e-05	30		35	2.21683e-05	40	2.95012e-05	45	3.19673e-05	50	1.86435e-05	55	2.65132e-05	60	4.56528e-05	65	6.60332e-05	70		75	4.32692e-05	80	2.13917e-05	85		90	7.29915e-05	95	2.55872e-05	100	2.39852e-05	105	7.76566e-05	110	6.33435e-05	115	5.21952e-05	120	1.72722e-05	125
	5	0.000199077	10	0.000215244	15	5.63504e-05	20		25	3.39207e-05	30		35	4.97867e-05	40	3.87117e-05	45	3.33401e-05	50	1.43095e-05	55	2.67659e-05	60	2.71041e-05	65	4.82089e-05	70		75	5.98592e-05	80	1.78635e-05	85		90	0.0001015	95	0.000338471	100	2.13859e-05	105	6.64144e-05	110	3.34602e-05	115	3.10926e-05	120	1.66783e-05	125
	5	3.85427e-05	10	0.000290947	15	0.000190441	20		25	0.0003327	30		35	4.74619e-05	40	3.81564e-05	45	5.67185e-05	50	1.38321e-05	55	3.98045e-05	60	4.04713e-05	65	8.26634e-05	70		75	4.48153e-05	80	0.000114428	85		90	6.57689e-05	95	2.43498e-05	100	2.37257e-05	105	3.4519e-05	110	3.45897e-05	115	4.52594e-05	120	1.71556e-05	125
	5	3.85e-05	10	4.2705e-05	15	3.11141e-05	20		25	2.60688e-05	30		35	5.89373e-05	40	4.29372e-05	45	3.41104e-05	50	1.40404e-05	55	3.17517e-05	60	2.73844e-05	65	5.67447e-05	70		75	7.21622e-05	80	3.29384e-05	85		90	5.88894e-05	95	2.8201e-05	100	1.65454e-05	105	2.71926e-05	110	1.87016e-05	115	4.61524e-05	120	2.07272e-05	125
	5	4.93442e-05	10	7.69749e-05	15	9.5417e-05	20		25	5.22933e-05	30		35	2.15658e-05	40	3.00518e-05	45	2.99653e-05	50	1.36963e-05	55	4.88806e-05	60	2.87452e-05	65	9.43654e-05	70		75	5.18616e-05	80	2.59812e-05	85		90	6.79833e-05	95	3.34665e-05	100	2.11331e-05	105	2.54145e-05	110	1.76054e-05	115	2.95719e-05	120	1.3904e-05	125
	5	3.96313e-05	10	8.24636e-05	15	7.81503e-05	20		25	4.36804e-05	30		35	5.03848e-05	40	6.07688e-05	45	4.63737e-05	50	1.61453e-05	55	2.96228e-05	60	6.55857e-05	65	0.000370744	70		75	4.05691e-05	80	2.32425e-05	85		90	6.73855e-05	95	2.05176e-05	100	2.38152e-05	105	2.1185e-05	110	4.60222e-05	115	4.19633e-05	120	1.54599e-05	125
	5	5.84905e-05	10	8.46954e-05	15	6.40506e-05	20		25	3.47081e-05	30		35	4.84315e-05	40	3.34637e-05	45	2.9651e-05	50	1.36156e-05	55	3.50072e-05	60	7.32472e-05	65	6.26069e-05	70		75	6.15762e-05	80	3.53278e-05	85		90	6.78207e-05	95	2.22615e-05	100	2.18431e-05	105	2.74688e-05	110	3.85999e-05	115	3.46786e-05	120	1.76234e-05	125
	5	4.09734e-05	10	0.000105617	15	6.47943e-05	20		25	2.72193e-05	30		35	3.02725e-05	40	3.00464e-05	45	2.9221e-05	50	1.30056e-05	55	3.44054e-05	60	3.0617e-05	65	6.83878e-05	70		75	8.69931e-05	80	0.00166861	85		90	6.04034e-05	95	2.0501e-05	100	0.000109956	105	2.66875e-05	110	2.05384e-05	115	3.00945e-05	120	2.17664e-05	125
	5	4.55465e-05	10	0.00013975	15	0.000107643	20		25	3.98589e-05	30		35	2.76522e-05	40	2.26401e-05	45	2.70299e-05	50	1.45746e-05	55	4.1735e-05	60	3.12679e-05	65	4.83621e-05	70		75	0.000101413	80	2.55382e-05	85		90	0.000366211	95	2.11623e-05	100	2.53823e-05	105	2.58152e-05	110	4.96588e-05	115	3.50828e-05	120	0.000117925	125
	5	4.61404e-05	10	0.00011324	15	3.03685e-05	20		25	5.59409e-05	30		35	2.24355e-05	40	4.80737e-05	45	4.31268e-05	50	1.59408e-05	55	3.4777e-05	60	2.61537e-05	65	0.000140137	70		75	4.42182e-05	80	0.000127513	85		90	7.09326e-05	95	2.61874e-05	100	2.43471e-05	105	2.42516e-05	110	1.89895e-05	115	3.0293e-05	120	1.75604e-05	125
	5	5.53022e-05	10	5.04464e-05	15	5.97778e-05	20		25	2.74621e-05	30		35	4.24896e-05	40	1.81026e-05	45	3.01162e-05	50	2.02295e-05	55	2.82827e-05	60	3.63607e-05	65	5.21112e-05	70		75	4.23525e-05	80	8.26839e-05	85		90	9.80193e-05	95	3.82976e-05	100	1.73258e-05	105	2.53078e-05	110	1.45753e-05	115	3.02594e-05	120	9.66894e-05	125
	5		10	4.97578e-05	15	3.27458e-05	20		25	2.68198e-05	30		35	0.000102921	40	3.31256e-05	45	2.71398e-05	50	1.32535e-05	55	3.88443e-05	60	3.19499e-05	65	0.000248306	70		75	4.33077e-05	80	2.2142e-05	85		90	0.000110837	95	5.23414e-05	100	2.53886e-05	105	7.40178e-05	110	2.52324e-05	115	4.9535e-05	120	1.38499e-05	125
	5		10	6.26639e-05	15	4.965e-05	20		25	2.72165e-05	30		35	3.12564e-05	40	2.08768e-05	45	5.02444e-05	50	1.37954e-05	55	3.58357e-05	60	5.39498e-05	65	7.30339e-05	70		75	5.17879e-05	80	6.47838e-05	85		90	5.98606e-05	95	4.64389e-05	100	3.08914e-05	105	8.64959e-05	110	5.13104e-05	115	7.06331e-05	120	1.58271e-05	125
	5		10	5.8646e-05	15	5.40368e-05	20		25	3.75189e-05	30		35	2.10776e-05	40	4.88989e-05	45	3.98326e-05	50	1.43878e-05	55	3.39544e-05	60	3.99419e-05	65	0.0018025	70		75	3.95389e-05	80	1.75316e-05	85		90	5.59365e-05	95	2.15128e-05	100	4.15512e-05	105	4.01646e-05	110	1.72507e-05	115	3.23831e-05	120	1.48305e-05	125
	5		10	4.95663e-05	15	4.04149e-05	20		25	2.82597e-05	30		35	2.81143e-05	40	2.76772e-05	45	3.49742e-05	50	1.57444e-05	55	3.05679e-05	60	3.07486e-05	65	0.000185895	70		75	4.86908e-05	80	3.08688e-05	85		90	7.59957e-05	95	0.00180864	100	2.26808e-05	105	2.18722e-05	110	1.49236e-05	115	3.41579e-05	120	1.4115e-05	125
	5		10	4.11003e-05	15	5.6768e-05	20		25	0.000156263	30		35	2.85924e-05	40	2.3323e-05	45	3.03458e-05	50	1.36518e-05	55	2.69893e-05	60	2.80667e-05	65	5.18265e-05	70		75	0.000802264	80	2.68543e-05	85		90	8.49051e-05	95	4.72494e-05	100	1.78107e-05	105	8.27659e-05	110	2.86798e-05	115	4.08209e-05	120	1.45603e-05	125
	5		10	3.85477e-05	15	5.73404e-05	20		25	3.39707e-05	30		35	7.32241e-05	40	4.00308e-05	45	3.11872e-05	50	1.47736e-05	55	3.08429e-05	60	8.60656e-05	65	0.000593665	70		75	4.03366e-05	80	8.14324e-05	85		90	0.00010518	95	3.58537e-05	100	2.72915e-05	105	2.00548e-05	110	5.42904e-05	115	5.84098e-05	120	2.27056e-05	125
	5		10	3.26488e-05	15	3.86848e-05	20		25	4.27225e-05	30		35	2.43963e-05	40	3.41886e-05	45	3.8593e-05	50	1.58679e-05	55	2.98217e-05	60	6.54332e-05	65	0.000139977	70		75	3.9245e-05	80	1.98474e-05	85		90	6.47291e-05	95	3.38727e-05	100	1.73236e-05	105	2.25035e-05	110	2.01494e-05	115	4.90185e-05	120	1.69163e-05	125
	5		10	4.11853e-05	15	3.84417e-05	20		25	4.02223e-05	30		35	2.24296e-05	40	0.000120022	45	7.32272e-05	50	1.56833e-05	55	0.000530241	60	2.8539e-05	65	0.000104344	70		75	3.86413e-05	80	0.000687873	85		90	6.96461e-05	95	3.99802e-05	100	1.69002e-05	105	5.00315e-05	110	2.33578e-05	115	3.26462e-05	120	2.34302e-05	125
	5		10	3.17371e-05	15	0.000103695	20		25	3.01507e-05	30		35	2.65287e-05	40	2.51579e-05	45	5.89611e-05	50	1.40093e-05	55	3.30253e-05	60	3.13342e-05	65	0.000100187	70		75	0.000140013	80	1.76748e-05	85		90	7.75959e-05	95	4.2863e-05	100	1.86955e-05	105	0.000111213	110	1.53875e-05	115	3.94424e-05	120	1.791e-05	125
	5		10		15	0.000122082	20		25	2.74739e-05	30		35	2.55828e-05	40	2.64033e-05	45	2.91172e-05	50	1.45418e-05	55	9.93246e-05	60	3.6766e-05	65	6.3703e-05	70		75	6.73638e-05	80	1.60382e-05	85		90	0.000108136	95	2.1386e-05	100	2.56439e-05	105	1.99878e-05	110	2.84248e-05	115	3.00494e-05	120	1.72447e-05	125
	5		10		15		20		25	3.19298e-05	30		35	8.91614e-05	40	2.18293e-05	45	2.87538e-05	50	1.37017e-05	55	9.9276e-05	60	4.23018e-05	65	5.15367e-05	70		75	5.6857e-05	80	0.000448969	85		90	6.3703e-05	95	3.25108e-05	100	1.91587e-05	105	3.17828e-05	110	2.87391e-05	115	3.25523e-05	120	1.67193e-05	125
	5		10		15		20		25	3.2838e-05	30		35	0.000271974	40	3.30422e-05	45	2.68897e-05	50	1.5492e-05	55	8.91149e-05	60	3.18577e-05	65	7.0333e-05	70		75	6.216e-05	80	3.04678e-05	85		90	7.51809e-05	95	4.31378e-05	100	3.4742e-05	105	3.98139e-05	110	1.855e-05	115	4.06224e-05	120	1.35239e-05	125
	5		10		15		20		25	2.6175e-05	30		35	0.000237927	40	3.36865e-05	45	3.63533e-05	50	4.27821e-05	55	3.07532e-05	60	2.85891e-05	65	5.81354e-05	70		75	0.000163893	80	3.92968e-05	85		90	6.90147e-05	95	3.73983e-05	100	2.76165e-05	105	2.68375e-05	110	2.42955e-05	115	3.89603e-05	120	1.66937e-05	125
	5		10		15		20		25	3.39321e-05	30		35	2.78128e-05	40	2.38205e-05	45	4.17959e-05	50	1.61846e-05	55	4.34164e-05	60	2.67008e-05	65	4.82172e-05	70		75		80	3.7846e-05	85		90	9.7642e-05	95	5.41021e-05	100	1.66791e-05	105	2.26481e-05	110	5.67603e-05	115	3.81572e-05	120	1.56765e-05	125
	5		10		15		20		25	3.32645e-05	30		35	4.19552e-05	40	2.94261e-05	45	2.9633e-05	50	2.0914e-05	55	3.5557e-05	60	3.1164e-05	65	0.000791049	70		75		80	5.44951e-05	85		90		95	3.06445e-05	100	1.93837e-05	105	2.21912e-05	110	1.94872e-05	115	0.000107471	120	1.51756e-05	125
	5		10		15		20		25	2.96402e-05	30		35	2.38925e-05	40	3.73528e-05	45	3.92472e-05	50	3.11875e-05	55	2.67006e-05	60	3.59073e-05	65	7.04632e-05	70		75		80	1.85665e-05	85		90		95	2.14286e-05	100	3.47552e-05	105	3.17631e-05	110	3.64955e-05	115	4.09525e-05	120	1.63769e-05	125
	5		10		15		20		25	4.02878e-05	30		35	2.20997e-05	40	3.05546e-05	45	3.52961e-05	50	2.36197e-05	55	4.64722e-05	60	2.51318e-05	65	5.86168e-05	70		75		80	1.6514e-05	85		90		95	2.29547e-05	100	3.65877e-05	105	2.1224e-05	110	1.57591e-05	115	3.18288e-05	120	1.37667e-05	125
	5		10		15		20		25	3.80227e-05	30		35	2.02837e-05	40	2.15762e-05	45	4.54432e-05	50	1.34346e-05	55	3.29079e-05	60	3.37973e-05	65	0.000366968	70		75		80	7.58646e-05	85		90		95	3.36658e-05	100	1.80317e-05	105	2.72553e-05	110	1.87518e-05	115	7.70623e-05	120	2.02242e-05	125
	5		10		15		20		25	3.34963e-05	30		35	3.06665e-05	40	2.40404e-05	45	4.91299e-05	50	2.20032e-05	55	0.000154623	60	2.50545e-05	65	0.00024695	70		75		80	3.32293e-05	85		90		95	3.12734e-05	100	1.78754e-05	105	3.59374e-05	110	2.9298e-05	115	3.24246e-05	120	2.27497e-05	125
	5		10		15		20		25	3.19279e-05	30		35	2.96107e-05	40	1.98392e-05	45	2.69156e-05	50	1.93712e-05	55	3.15059e-05	60	3.30273e-05	65	0.000141559	70		75		80	1.69865e-05	85		90		95	2.18891e-05	100	2.30861e-05	105	2.93156e-05	110	1.59991e-05	115	5.29511e-05	120	3.30239e-05	125
	5		10		15		20		25	2.72997e-05	30		35	3.12652e-05	40	2.62248e-05	45	2.67965e-05	50	1.84884e-05	55	0.000133337	60	3.01361e-05	65	0.000148887	70		75		80	1.60771e-05	85		90		95	2.05024e-05	100	5.02579e-05	105	3.49841e-05	110	2.07878e-05	115	3.09004e-05	120	2.73113e-05	125
	5		10		15		20		25	2.62911e-05	30		35	5.54154e-05	40	3.02004e-05	45	2.72708e-05	50	1.32414e-05	55	6.93778e-05	60	7.81671e-05	65	7.07509e-05	70		75		80	4.06014e-05	85		90		95	4.41424e-05	100	2.62803e-05	105	3.90166e-05	110	1.86303e-05	115	3.90704e-05	120	1.75178e-05	125
	5		10		15		20		25	3.19608e-05	30		35	2.01629e-05	40	3.24535e-05	45	0.000103391	50	1.51704e-05	55	3.53543e-05	60	9.70953e-05	65	5.00217e-05	70		75		80	3.371e-05	85		90		95	5.34485e-05	100	2.28626e-05	105	1.9743e-05	110	3.73704e-05	115	3.42586e-05	120	1.40981e-05	125
	5		10		15		20		25	3.42832e-05	30		35	2.0037e-05	40	3.94872e-05	45	4.2226e-05	50	1.78503e-05	55	3.42214e-05	60	0.000114892	65	0.000170689	70		75		80	2.08583e-05	85		90		95	4.0745e-05	100	2.276e-05	105	2.29713e-05	110	5.87347e-05	115	3.0882e-05	120	1.52345e-05	125
	5		10		15		20		25	3.13834e-05	30		35	2.05123e-05	40	1.9054e-05	45	2.92463e-05	50	2.43016e-05	55	2.75007e-05	60	0.000106849	65	7.91105e-05	70		75		80	2.60266e-05	85		90		95	2.52014e-05	100	2.37343e-05	105	0.000158332	110	1.82747e-05	115	4.80153e-05	120	1.47952e-05	125
	5		10		15		20		25	3.58101e-05	30		35	2.49996e-05	40	2.16492e-05	45	3.51129e-05	50	1.45678e-05	55	2.82086e-05	60	7.98863e-05	65	0.00572519	70		75		80	2.62851e-05	85		90		95	2.36969e-05	100	1.75054e-05	105	0.00021703	110	2.04153e-05	115	3.94498e-05	120	1.45949e-05	125
	5		10		15		20		25	2.65854e-05	30		35	2.55803e-05	40	1.95932e-05	45	2.94165e-05	50	2.63147e-05	55	3.76974e-05	60	7.05419e-05	65	0.000154977	70		75		80	8.75352e-05	85		90		95	2.13551e-05	100	2.01735e-05	105	0.000182512	110	1.43705e-05	115	4.90608e-05	120	1.59894e-05	125
	5		10		15		20		25	4.16893e-05	30		35	2.06814e-05	40	4.22097e-05	45	8.02094e-05	50	2.1378e-05	55	2.96222e-05	60	2.73066e-05	65	0.000225482	70		75		80	3.32434e-05	85		90		95	6.35674e-05	100	1.79597e-05	105	4.30735e-05	110	2.20647e-05	115	3.14061e-05	120	1.46388e-05	125
	5		10		15		20		25	5.27465e-05	30		35	6.4343e-05	40	2.55734e-05	45	2.79847e-05	50	1.5561e-05	55	4.36381e-05	60	2.56118e-05	65	0.00119892	70		75		80	0.000281082	85		90		95	2.28266e-05	100	2.81281e-05	105	2.12899e-05	110	2.33258e-05	115	2.9715e-05	120	1.85186e-05	125
	5		10		15		20		25	4.42969e-05	30		35	4.96035e-05	40	2.12757e-05	45	3.73463e-05	50	2.7217e-05	55	2.87681e-05	60	3.84942e-05	65	5.20794e-05	70		75		80	2.29139e-05	85		90		95	2.10347e-05	100	2.43374e-05	105	0.000145749	110	6.18508e-05	115	3.29517e-05	120	1.66773e-05	125
	5		10		15		20		25	2.89694e-05	30		35	2.13052e-05	40	2.54069e-05	45	3.42566e-05	50	3.01069e-05	55	3.8638e-05	60	3.9792e-05	65	0.000430818	70		75		80	6.02117e-05	85		90		95	3.98181e-05	100	3.43829e-05	105	2.24986e-05	110	8.93613e-05	115	3.45207e-05	120	1.44955e-05	125
	5		10		15		20		25	2.72436e-05	30		35	9.96262e-05	40	4.52754e-05	45	5.94871e-05	50	1.47952e-05	55	4.61183e-05	60	2.90148e-05	65	6.30601e-05	70		75		80	4.91761e-05	85		90		95	2.24683e-05	100	2.15653e-05	105	2.16397e-05	110	3.12972e-05	115	3.02398e-05	120	1.98455e-05	125
	5		10		15		20		25	2.72101e-05	30		35	3.57546e-05	40	3.72719e-05	45	3.0244e-05	50	1.4959e-05	55	3.34493e-05	60	3.01451e-05	65	6.2656e-05	70		75		80	2.87355e-05	85		90		95	8.26468e-05	100	1.88762e-05	105	7.69963e-05	110	2.58631e-05	115	3.05423e-05	120	1.46595e-05	125
	5		10		15		20		25	3.51231e-05	30		35	0.000312953	40	3.19251e-05	45	3.38993e-05	50	1.35914e-05	55	2.95627e-05	60	3.37939e-05	65	8.66761e-05	70		75		80	4.8982e-05	85		90		95	3.94431e-05	100	2.3611e-05	105	8.90374e-05	110	7.15393e-05	115	3.34752e-05	120	2.83445e-05	125
	5		10		15		20		25	2.68635e-05	30		35	5.47303e-05	40	2.07337e-05	45	2.77814e-05	50	1.63342e-05	55	4.32142e-05	60	3.44547e-05	65	5.93157e-05	70		75		80	2.37886e-05	85		90		95	2.16977e-05	100	1.9204e-05	105	2.08722e-05	110	1.63935e-05	115	4.10974e-05	120	2.18765e-05	125
	5		10		15		20		25	3.73999e-05	30		35	2.91853e-05	40	6.08401e-05	45	3.72085e-05	50	1.53586e-05	55	3.7804e-05	60	4.62783e-05	65	0.000167744	70		75		80	2.25845e-05	85		90		95	3.56002e-05	100	4.02664e-05	105	0.000175224	110	1.47176e-05	115	3.97092e-05	120	1.71235e-05	125
	5		10		15		20		25	2.61865e-05	30		35	2.24888e-05	40	3.80467e-05	45	4.59887e-05	50	1.42403e-05	55	2.71508e-05	60	2.53709e-05	65	7.5972e-05	70		75		80	2.29522e-05	85		90		95	4.0282e-05	100	1.85016e-05	105	2.13589e-05	110	1.35508e-05	115	3.05066e-05	120	1.57585e-05	125
	5		10		15		20		25	3.59877e-05	30		35	2.07208e-05	40	2.56907e-05	45	4.81948e-05	50	1.50808e-05	55	3.48295e-05	60	5.6519e-05	65	6.35901e-05	70		75		80	2.81759e-05	85		90		95	3.28269e-05	100	2.71466e-05	105	0.00053724	110	1.68455e-05	115	4.90488e-05	120	2.48606e-05	125
	5		10		15		20		25	0.000150146	30		35	3.93982e-05	40	2.42196e-05	45	2.95672e-05	50	1.30544e-05	55	3.33686e-05	60	3.42283e-05	65	6.44438e-05	70		75		80	4.38183e-05	85		90		95	4.17324e-05	100	5.37539e-05	105	0.000185019	110	3.37033e-05	115	3.34491e-05	120	1.42775e-05	125
	5		10		15		20		25	0.000157932	30		35	2.82518e-05	40	4.62088e-05	45	3.12411e-05	50	1.37461e-05	55	3.2936e-05	60	5.58016e-05	65	7.2563e-05	70		75		80	2.61131e-05	85		90		95	2.81825e-05	100	1.88227e-05	105	2.70947e-05	110	2.9968e-05	115	3.96362e-05	120	1.97681e-05	125
	5		10		15		20		25	2.95836e-05	30		35	6.32587e-05	40	4.27166e-05	45	3.22049e-05	50	1.71857e-05	55	3.48838e-05	60	2.83133e-05	65	0.000131721	70		75		80	2.56152e-05	85		90		95	2.49295e-05	100	2.08348e-05	105	3.20759e-05	110	6.98363e-05	115	7.69488e-05	120	7.88205e-05	125
	5		10		15		20		25	2.71215e-05	30		35	3.28594e-05	40	1.83798e-05	45	4.07675e-05	50	1.88068e-05	55	4.35441e-05	60	2.99268e-05	65	5.49956e-05	70		75		80	1.70591e-05	85		90		95	2.35226e-05	100	1.96205e-05	105	2.22256e-05	110	4.68292e-05	115	4.76325e-05	120	1.46582e-05	125
	5		10		15		20		25	3.25116e-05	30		35	9.34975e-05	40	2.62792e-05	45	6.98412e-05	50	1.54643e-05	55	2.99886e-05	60	2.81639e-05	65	0.000106147	70		75		80	1.66366e-05	85		90		95	2.05046e-05	100	2.07912e-05	105	2.11015e-05	110	2.28604e-05	115	4.26424e-05	120	1.75088e-05	125
	5		10		15		20		25	3.12441e-05	30		35	4.44639e-05	40	2.22772e-05	45	6.53435e-05	50	1.60296e-05	55	0.00171379	60	2.92886e-05	65	5.27736e-05	70		75		80	4.9914e-05	85		90		95	4.6654e-05	100	2.11131e-05	105	2.09103e-05	110	1.58931e-05	115	4.52621e-05	120	1.57148e-05	125
	5		10		15		20		25	2.78371e-05	30		35	2.50484e-05	40	6.28344e-05	45	3.01034e-05	50	1.46027e-05	55	3.02872e-05	60	5.92479e-05	65	8.01425e-05	70		75		80	6.14498e-05	85		90		95	5.01638e-05	100	2.59348e-05	105	2.02903e-05	110	1.42129e-05	115	3.62205e-05	120	1.44274e-05	125
	5		10		15		20		25	2.92493e-05	30		35	5.66104e-05	40	6.24776e-05	45	2.98284e-05	50	2.56424e-05	55	3.2437e-05	60	3.19496e-05	65	0.000143045	70		75		80	3.46872e-05	85		90		95	2.58819e-05	100	2.55505e-05	105	2.43878e-05	110	2.24714e-05	115	3.63689e-05	120	1.85693e-05	125
	5		10		15		20		25	3.01452e-05	30		35	8.82819e-05	40	3.56909e-05	45	3.3677e-05	50	1.3295e-05	55	2.67765e-05	60	4.24107e-05	65	9.29578e-05	70		75		80	1.6042e-05	85		90		95	4.50832e-05	100	1.90419e-05	105	2.77138e-05	110	2.13746e-05	115	3.2854e-05	120	1.45362e-05	125
	5		10		15		20		25		30		35	3.4113e-05	40	2.58318e-05	45	4.79699e-05	50	1.48902e-05	55	4.6432e-05	60	3.64203e-05	65	9.06949e-05	70		75		80	1.67881e-05	85		90		95	2.12377e-05	100	1.73003e-05	105	3.60339e-05	110	7.0161e-05	115	3.62368e-05	120	1.47865e-05	125
	5		10		15		20		25		30		35	3.0241e-05	40	2.35174e-05	45	2.7322e-05	50	1.53947e-05	55	3.42225e-05	60	3.28807e-05	65	7.61469e-05	70		75		80	1.91786e-05	85		90		95	4.31333e-05	100	1.88978e-05	105	4.90572e-05	110	1.65594e-05	115	3.45819e-05	120	1.8215e-05	125
	5		10		15		20		25		30		35	4.78728e-05	40	2.40765e-05	45	3.03704e-05	50	1.511e-05	55	0.000335358	60	2.83655e-05	65	0.000122663	70		75		80	2.31706e-05	85		90		95	2.25901e-05	100	1.98153e-05	105	0.000175291	110	2.99474e-05	115	8.16631e-05	120	1.59202e-05	125
	5		10		15		20		25		30		35	3.24129e-05	40	2.95415e-05	45	3.06138e-05	50	1.71106e-05	55	4.87959e-05	60	3.06549e-05	65	8.85918e-05	70		75		80	3.44819e-05	85		90		95	2.0848e-05	100	1.80502e-05	105	0.000285559	110	3.22276e-05	115	4.03463e-05	120	2.54694e-05	125
	5		10		15		20		25		30		35	5.24789e-05	40	2.97982e-05	45	4.31895e-05	50	1.84547e-05	55	6.26388e-05	60	2.91139e-05	65	0.000143898	70		75		80	4.88327e-05	85		90		95	3.91838e-05	100	3.73005e-05	105	2.81026e-05	110	4.1937e-05	115	6.9837e-05	120	1.40872e-05	125
	5		10		15		20		25		30		35	6.99725e-05	40	2.55253e-05	45	3.61102e-05	50	1.47631e-05	55	2.93891e-05	60	2.77154e-05	65	8.26351e-05	70		75		80	5.04924e-05	85		90		95	2.63827e-05	100	7.30356e-05	105	1.96038e-05	110	4.46493e-05	115	3.68465e-05	120	1.58568e-05	125
	5		10		15		20		25		30		35	8.29086e-05	40	1.93948e-05	45	4.44586e-05	50	6.18062e-05	55	2.66132e-05	60	3.05007e-05	65	0.00116968	70		75		80	3.56264e-05	85		90		95	2.48307e-05	100	8.0421e-05	105	2.00395e-05	110	1.24766e-05	115	4.58522e-05	120	1.3573e-05	125
	5		10		15		20		25		30		35	2.67967e-05	40	2.66546e-05	45	6.11082e-05	50	1.49306e-05	55	4.1401e-05	60	5.74053e-05	65	0.000104608	70		75		80	4.86546e-05	85		90		95	2.12483e-05	100	2.51066e-05	105	2.65693e-05	110	1.80554e-05	115	3.2559e-05	120	1.3649e-05	125
	5		10		15		20		25		30		35	2.33383e-05	40	2.43293e-05	45	4.2528e-05	50	2.91793e-05	55	3.99456e-05	60	4.62563e-05	65	0.000282445	70		75		80	4.06821e-05	85		90		95	3.60493e-05	100	2.76003e-05	105	0.000117613	110	1.82848e-05	115	3.11114e-05	120	1.83356e-05	125
	5		10		15		20		25		30		35	2.25416e-05	40	2.3777e-05	45	5.63369e-05	50	4.43128e-05	55	2.72865e-05	60	3.34582e-05	65	5.44318e-05	70		75		80	1.83013e-05	85		90		95	2.1564e-05	100	1.78226e-05	105	0.000127153	110	2.18172e-05	115	3.18982e-05	120	1.68096e-05	125
	5		10		15		20		25		30		35	0.000175592	40	2.35429e-05	45	2.78572e-05	50	1.545e-05	55	4.06459e-05	60	2.55362e-05	65	5.25182e-05	70		75		80	0.000145843	85		90		95	2.41821e-05	100	1.96396e-05	105	2.57971e-05	110	1.94485e-05	115	6.222e-05	120	2.03372e-05	125
	5		10		15		20		25		30		35	4.59162e-05	40	3.34532e-05	45	7.12721e-05	50	1.38955e-05	55	2.96851e-05	60	4.19629e-05	65	7.32181e-05	70		75		80	1.95049e-05	85		90		95	3.24497e-05	100	2.6095e-05	105	5.62235e-05	110	2.02598e-05	115	4.0787e-05	120	2.54257e-05	125
	5		10		15		20		25		30		35	0.000226883	40	4.93062e-05	45	3.09e-05	50	3.08573e-05	55	5.50514e-05	60	3.72697e-05	65	6.02454e-05	70		75		80	2.37575e-05	85		90		95	2.26345e-05	100	1.70477e-05	105	3.6838e-05	110	2.26814e-05	115	3.3954e-05	120	1.62373e-05	125
	5		10		15		20		25		30		35	3.63383e-05	40	3.70784e-05	45	4.06903e-05	50	1.904e-05	55	3.12603e-05	60	3.9329e-05	65	0.000189397	70		75		80	1.71904e-05	85		90		95	3.9487e-05	100	3.72744e-05	105	4.47534e-05	110	7.67329e-05	115	4.20751e-05	120	1.41891e-05	125
	5		10		15		20		25		30		35	0.000139026	40	3.46272e-05	45	0.000127436	50	6.40808e-05	55	3.3438e-05	60	2.69625e-05	65	0.000225891	70		75		80	2.37317e-05	85		90		95	3.93384e-05	100	3.61299e-05	105	6.71655e-05	110	1.27649e-05	115	3.37788e-05	120	2.29949e-05	125
	5		10		15		20		25		30		35	3.15354e-05	40	4.78673e-05	45	0.000117097	50	2.22108e-05	55	3.37361e-05	60	3.39228e-05	65	0.000898798	70		75		80	3.19965e-05	85		90		95	4.26219e-05	100	3.81759e-05	105	9.21574e-05	110	1.54475e-05	115	4.13772e-05	120	1.58107e-05	125
	5		10		15		20		25		30		35	3.29263e-05	40	5.02658e-05	45	3.47018e-05	50	2.2612e-05	55	4.31524e-05	60	2.53286e-05	65	6.52419e-05	70		75		80	2.79789e-05	85		90		95	2.05052e-05	100	2.85126e-05	105	0.000129164	110	1.99993e-05	115	3.32555e-05	120	2.66523e-05	125
	5		10		15		20		25		30		35	4.10041e-05	40	4.89383e-05	45	2.7442e-05	50	1.57497e-05	55	2.87101e-05	60	2.95092e-05	65	5.05901e-05	70		75		80	2.41796e-05	85		90		95	2.07212e-05	100	2.01539e-05	105	0.000163615	110	0.000114812	115	8.17535e-05	120	1.42164e-05	125
	5		10		15		20		25		30		35	3.88454e-05	40	3.54214e-05	45	4.26508e-05	50	2.32957e-05	55	4.37987e-05	60	3.74698e-05	65	5.77654e-05	70		75		80	2.22843e-05	85		90		95	6.56828e-05	100	4.19209e-05	105	2.81815e-05	110	5.42905e-05	115	3.5249e-05	120	1.71598e-05	125
	5		10		15		20		25		30		35	3.63365e-05	40	2.02003e-05	45	5.08139e-05	50	2.85831e-05	55	3.20979e-05	60	3.66244e-05	65	0.000320078	70		75		80	2.0195e-05	85		90		95	6.12609e-05	100	1.6648e-05	105	0.000227898	110	2.17167e-05	115	3.26122e-05	120	1.43727e-05	125
	5		10		15		20		25		30		35	2.18617e-05	40	6.87427e-05	45	2.82892e-05	50	1.7711e-05	55	6.98262e-05	60	5.75465e-05	65	0.000351365	70		75		80	4.50798e-05	85		90		95	4.81136e-05	100	2.17303e-05	105	1.96644e-05	110	4.41002e-05	115	4.12535e-05	120	1.41478e-05	125
	5		10		15		20		25		30		35	6.16517e-05	40	7.22986e-05	45	2.78238e-05	50	1.38054e-05	55	2.89352e-05	60	2.68192e-05	65	0.000106803	70		75		80	0.00571963	85		90		95	2.60652e-05	100	3.01371e-05	105	3.61348e-05	110	1.4031e-05	115	7.4505e-05	120	1.94527e-05	125
	5		10		15		20		25		30		35	4.65367e-05	40	2.79014e-05	45	5.13665e-05	50	0.000605292	55	3.01356e-05	60	2.87474e-05	65	7.08609e-05	70		75		80	2.47586e-05	85		90		95	2.0954e-05	100	2.3551e-05	105	2.6661e-05	110	3.51884e-05	115	8.86339e-05	120	1.39517e-05	125
	5		10		15		20		25		30		35	2.56075e-05	40	2.23261e-05	45	3.99364e-05	50	0.000521489	55	3.88062e-05	60	4.55196e-05	65	0.00014416	70		75		80	0.0170621	85		90		95	2.31359e-05	100	1.83148e-05	105	2.22608e-05	110	3.11718e-05	115	3.34809e-05	120	1.49634e-05	125
	5		10		15		20		25		30		35	2.16189e-05	40	2.59933e-05	45	3.97934e-05	50	0.00012645	55	2.88037e-05	60	3.83573e-05	65	4.74847e-05	70		75		80	0.000493872	85		90		95	3.37034e-05	100	3.13981e-05	105	2.09559e-05	110	0.000242861	115	3.17864e-05	120	3.83266e-05	125
	5		10		15		20		25		30		35	6.28266e-05	40	0.000140761	45	2.96725e-05	50	0.000473298	55	2.89848e-05	60	4.37003e-05	65	5.20007e-05	70		75		80	0.000168443	85		90		95	4.10569e-05	100	3.19445e-05	105	0.000257507	110	2.68836e-05	115	2.98618e-05	120	2.00443e-05	125
	5		10		15		20		25		30		35	2.7582e-05	40	3.67677e-05	45	5.53629e-05	50	0.000321755	55	3.10785e-05	60	4.53845e-05	65	5.42633e-05	70		75		80	2.49129e-05	85		90		95	5.93427e-05	100	1.69994e-05	105	2.21436e-05	110	1.92461e-05	115	3.6957e-05	120	2.48585e-05	125
	5		10		15		20		25		30		35	5.10879e-05	40	3.43895e-05	45	5.09914e-05	50	6.92361e-05	55	3.38774e-05	60	8.31586e-05	65	7.48691e-05	70		75		80	0.000481615	85		90		95	2.13734e-05	100	2.01935e-05	105	0.000128875	110	3.40366e-05	115	3.20855e-05	120	0.000115271	125
	5		10		15		20		25		30		35	0.000122285	40	2.99526e-05	45	4.76881e-05	50	8.6112e-05	55	5.81013e-05	60	2.72162e-05	65	5.02835e-05	70		75		80	5.32106e-05	85		90		95	3.61236e-05	100	2.07423e-05	105	2.02774e-05	110	2.63556e-05	115	3.32949e-05	120	5.04842e-05	125
	5		10		15		20		25		30		35	0.00021983	40	3.75606e-05	45	4.14162e-05	50	3.77106e-05	55	2.71874e-05	60	2.84993e-05	65	0.000490203	70		75		80	2.31745e-05	85		90		95	3.33296e-05	100	6.27837e-05	105	2.28309e-05	110	1.45002e-05	115	3.24958e-05	120	1.43287e-05	125
	5		10		15		20		25		30		35	0.000426059	40	5.14917e-05	45	3.59696e-05	50	0.000360113	55	2.80504e-05	60	5.70945e-05	65	5.30577e-05	70		75		80	0.000376404	85		90		95	4.40071e-05	100	1.67157e-05	105	2.94548e-05	110	2.484e-05	115	3.23636e-05	120	2.15387e-05	125
	5		10		15		20		25		30		35	0.000155504	40	3.75942e-05	45	3.40983e-05	50	0.000352584	55	3.11222e-05	60	2.60367e-05	65	0.000104079	70		75		80	0.000351054	85		90		95	2.505e-05	100	2.38059e-05	105	2.1708e-05	110	2.11614e-05	115	4.32971e-05	120	3.84438e-05	125
	5		10		15		20		25		30		35	2.5219e-05	40	4.30845e-05	45	3.53198e-05	50	0.000103627	55	4.87945e-05	60	4.06966e-05	65	0.00013995	70		75		80	0.00156385	85		90		95	2.2924e-05	100	2.50556e-05	105	2.20578e-05	110	5.26114e-05	115	3.51196e-05	120	3.14868e-05	125
	5		10		15		20		25		30		35	2.45014e-05	40	6.43604e-05	45	2.85658e-05	50	1.71197e-05	55	4.30003e-05	60	4.27738e-05	65	7.43822e-05	70		75		80	0.00113042	85		90		95	2.1163e-05	100	2.14803e-05	105	2.69355e-05	110	1.84752e-05	115	3.24698e-05	120	3.7576e-05	125
	5		10		15		20		25		30		35	6.26341e-05	40	2.66443e-05	45	6.2583e-05	50	1.6499e-05	55	3.69454e-05	60	4.34163e-05	65	7.94642e-05	70		75		80	2.10579e-05	85		90		95	2.84211e-05	100	1.94056e-05	105	2.49048e-05	110	2.84094e-05	115	3.60003e-05	120	1.78743e-05	125
	5		10		15		20		25		30		35	7.96308e-05	40	3.18475e-05	45	5.30708e-05	50	2.7616e-05	55	2.76108e-05	60	4.0736e-05	65	0.000159139	70		75		80	5.34987e-05	85		90		95	7.00421e-05	100	3.36157e-05	105	2.90413e-05	110	6.69025e-05	115	7.71048e-05	120	1.38772e-05	125
	5		10		15		20		25		30		35	3.57156e-05	40	2.31854e-05	45	2.97598e-05	50	4.86958e-05	55	4.42121e-05	60	4.67139e-05	65	5.62657e-05	70		75		80	3.05574e-05	85		90		95	2.23984e-05	100	2.03357e-05	105	2.62227e-05	110	1.47561e-05	115	3.47e-05	120	1.35252e-05	125
	5		10		15		20		25		30		35	4.66073e-05	40	2.13511e-05	45	6.66884e-05	50	0.000123665	55	3.15246e-05	60	6.37619e-05	65	6.20409e-05	70		75		80	2.66362e-05	85		90		95	2.35443e-05	100	2.1947e-05	105	2.1771e-05	110	1.37371e-05	115	3.79629e-05	120	1.66496e-05	125
	5		10		15		20		25		30		35	2.38617e-05	40	2.49853e-05	45	7.52946e-05	50	8.2091e-05	55	5.36529e-05	60	2.94154e-05	65	0.000105891	70		75		80	2.03927e-05	85		90		95	2.83458e-05	100	2.81078e-05	105	2.01905e-05	110	4.3283e-05	115	4.11537e-05	120	1.80744e-05	125
	5		10		15		20		25		30		35	2.41262e-05	40	2.25063e-05	45	2.92385e-05	50	3.04472e-05	55	6.56706e-05	60	3.07254e-05	65	0.000238524	70		75		80	1.94757e-05	85		90		95	2.43818e-05	100	0.000115951	105	2.90503e-05	110	2.38793e-05	115	3.83953e-05	120	4.7701e-05	125
	5		10		15		20		25		30		35	4.05946e-05	40	3.18729e-05	45	3.09736e-05	50	0.000147593	55	4.12816e-05	60	4.60257e-05	65	9.53988e-05	70		75		80	2.09737e-05	85		90		95	5.22421e-05	100	3.6861e-05	105	0.000714856	110	1.84097e-05	115	4.16551e-05	120	1.94495e-05	125
	5		10		15		20		25		30		35	2.76709e-05	40	2.40413e-05	45	9.18984e-05	50	0.000255147	55	3.13439e-05	60	4.70277e-05	65	0.000122773	70		75		80	3.01964e-05	85		90		95	2.06538e-05	100	3.21463e-05	105	0.000171771	110	5.32872e-05	115	4.9673e-05	120	1.54552e-05	125
	5		10		15		20		25		30		35	2.22324e-05	40	2.50211e-05	45	0.000320767	50	0.000328521	55	2.69033e-05	60	2.55743e-05	65	0.000450936	70		75		80	3.17442e-05	85		90		95	0.000111394	100	3.44906e-05	105	2.89724e-05	110	1.41904e-05	115	0.000192116	120	1.41036e-05	125
	5		10		15		20		25		30		35	7.40663e-05	40	2.72517e-05	45	4.856e-05	50	0.000374748	55	3.65496e-05	60	2.53993e-05	65	0.00040393	70		75		80	2.58868e-05	85		90		95	2.30304e-05	100	1.86582e-05	105	3.35691e-05	110	4.3713e-05	115	4.73492e-05	120	1.86683e-05	125
	5		10		15		20		25		30		35	4.73354e-05	40	3.32299e-05	45	2.70862e-05	50	0.00019071	55	3.00584e-05	60	3.17824e-05	65	5.96881e-05	70		75		80	5.00044e-05	85		90		95	2.15516e-05	100	2.30127e-05	105	4.14738e-05	110	9.22769e-05	115	5.80843e-05	120	1.48248e-05	125
	5		10		15		20		25		30		35	0.000254758	40	1.91979e-05	45	2.76578e-05	50	0.00017025	55	4.33776e-05	60	3.65867e-05	65	6.3832e-05	70		75		80	1.7314e-05	85		90		95	5.92437e-05	100	3.29714e-05	105	2.70972e-05	110	3.07888e-05	115	3.9489e-05	120	1.49228e-05	125
	5		10		15		20		25		30		35	3.35124e-05	40	2.02688e-05	45	3.3747e-05	50	5.0735e-05	55	2.89945e-05	60	3.28094e-05	65	0.000130064	70		75		80	1.88454e-05	85		90		95	2.28572e-05	100	1.8399e-05	105	1.95025e-05	110	1.75427e-05	115	3.6828e-05	120	3.23815e-05	125
	5		10		15		20		25		30		35	2.09814e-05	40	3.36301e-05	45	8.0756e-05	50	5.51385e-05	55	5.17958e-05	60	3.26613e-05	65	5.98125e-05	70		75		80	1.91084e-05	85		90		95	2.25957e-05	100	2.7993e-05	105	2.48443e-05	110	1.77872e-05	115	3.05703e-05	120	2.69462e-05	125
	5		10		15		20		25		30		35	2.55744e-05	40	2.6034e-05	45	6.01913e-05	50	6.77793e-05	55	0.000110431	60	2.60809e-05	65	6.82103e-05	70		75		80	2.89708e-05	85		90		95	2.54553e-05	100	1.74616e-05	105	2.99686e-05	110	1.21359e-05	115	3.22374e-05	120	1.72588e-05	125
	5		10		15		20		25		30		35	2.64108e-05	40	2.1007e-05	45	2.77122e-05	50	2.77819e-05	55	3.08621e-05	60	2.63224e-05	65	0.000408505	70		75		80	8.77188e-05	85		90		95	7.43247e-05	100	1.79101e-05	105	2.35783e-05	110	4.3816e-05	115	3.93933e-05	120	1.41891e-05	125
	5		10		15		20		25		30		35	4.30973e-05	40	2.32661e-05	45	3.50212e-05	50	2.66949e-05	55	2.79902e-05	60	5.23202e-05	65	6.20139e-05	70		75		80	0.000127073	85		90		95	2.28071e-05	100	2.24069e-05	105	2.40299e-05	110	4.51371e-05	115	3.44834e-05	120	1.59589e-05	125
	5		10		15		20		25		30		35	4.88035e-05	40	5.07888e-05	45	3.63753e-05	50	2.57056e-05	55	3.63147e-05	60	2.76198e-05	65	0.000204501	70		75		80	0.000108169	85		90		95	6.15863e-05	100	3.02539e-05	105	2.36601e-05	110	1.29128e-05	115	4.06097e-05	120	2.08191e-05	125
	5		10		15		20		25		30		35	5.28614e-05	40	2.97684e-05	45	3.62008e-05	50	1.84368e-05	55	7.18972e-05	60	2.8558e-05	65	7.82618e-05	70		75		80		85		90		95	2.76011e-05	100	2.337e-05	105	2.0786e-05	110	1.92905e-05	115	6.43245e-05	120	1.36921e-05	125
	5		10		15		20		25		30		35	4.22619e-05	40	2.17798e-05	45	4.23629e-05	50	2.84705e-05	55	3.72238e-05	60	4.22167e-05	65	0.000901731	70		75		80		85		90		95	3.97625e-05	100	1.78269e-05	105	2.02496e-05	110	1.40847e-05	115	3.44255e-05	120	1.67549e-05	125
	5		10		15		20		25		30		35	2.65646e-05	40	2.28494e-05	45	3.17942e-05	50	2.39595e-05	55	3.01977e-05	60	3.37369e-05	65	5.90116e-05	70		75		80		85		90		95	3.19284e-05	100	2.47086e-05	105	2.55381e-05	110	1.78238e-05	115	2.95241e-05	120	1.63195e-05	125
	5		10		15		20		25		30		35	0.000382381	40	2.71456e-05	45	2.65051e-05	50	7.24528e-05	55	3.05673e-05	60	0.000125884	65	8.22673e-05	70		75		80		85		90		95	2.13736e-05	100	2.20736e-05	105	2.852e-05	110	3.10304e-05	115	3.8044e-05	120	1.52623e-05	125
	5		10		15		20		25		30		35	2.04538e-05	40	1.95711e-05	45	3.50741e-05	50	8.42687e-05	55	2.65774e-05	60	5.67445e-05	65	0.000508134	70		75		80		85		90		95	2.14133e-05	100	4.59261e-05	105	0.000222618	110	3.08231e-05	115	3.12595e-05	120	1.58847e-05	125
	5		10		15		20		25		30		35	2.93399e-05	40	4.35683e-05	45	4.70858e-05	50	2.89224e-05	55	3.80369e-05	60	2.98601e-05	65	9.7805e-05	70		75		80		85		90		95	2.40354e-05	100	3.27313e-05	105	2.56391e-05	110	9.86255e-05	115	5.44497e-05	120	1.69242e-05	125
	5		10		15		20		25		30		35	3.04994e-05	40	2.18944e-05	45	3.67013e-05	50	6.42336e-05	55	3.27443e-05	60	3.13201e-05	65	5.4903e-05	70		75		80		85		90		95	9.61716e-05	100	1.86074e-05	105	2.27231e-05	110	2.29681e-05	115	3.37958e-05	120	1.5351e-05	125
	5		10		15		20		25		30		35	2.76706e-05	40	2.57247e-05	45	3.29476e-05	50	1.72017e-05	55	2.90765e-05	60	3.57583e-05	65	7.04509e-05	70		75		80		85		90		95	2.73493e-05	100	3.15575e-05	105	0.000112959	110	5.37846e-05	115	3.20517e-05	120	1.90899e-05	125
	5		10		15		20		25		30		35	3.0724e-05	40	2.06449e-05	45	3.49371e-05	50	1.72801e-05	55	3.72152e-05	60	4.36034e-05	65	8.05964e-05	70		75		80		85		90		95	2.68644e-05	100	1.74011e-05	105	0.000132403	110	2.34449e-05	115	2.99326e-05	120	1.60651e-05	125
	5		10		15		20		25		30		35	5.58992e-05	40	4.45659e-05	45	2.91161e-05	50	4.1497e-05	55	3.79655e-05	60	4.84301e-05	65	0.000137746	70		75		80		85		90		95	2.90713e-05	100	2.51582e-05	105	7.65758e-05	110	1.91489e-05	115	3.06915e-05	120	1.39095e-05	125
	5		10		15		20		25		30		35	2.81459e-05	40	3.65735e-05	45	2.82473e-05	50	4.84008e-05	55	2.81539e-05	60	3.32676e-05	65	0.000104463	70		75		80		85		90		95	2.13647e-05	100	1.85627e-05	105	0.00051907	110	1.87093e-05	115	3.73572e-05	120	1.91652e-05	125
	5		10		15		20		25		30		35	2.13372e-05	40	2.56186e-05	45	4.4466e-05	50	4.36478e-05	55	4.2058e-05	60	3.3792e-05	65	8.90539e-05	70		75		80		85		90		95	5.28294e-05	100	1.92449e-05	105	2.48227e-05	110	1.6407e-05	115	3.21005e-05	120	2.36081e-05	125
	5		10		15		20		25		30		35	2.14753e-05	40	3.84424e-05	45	5.20417e-05	50	3.22114e-05	55	2.82816e-05	60	4.41249e-05	65	6.43959e-05	70		75		80		85		90		95	5.86239e-05	100	2.23721e-05	105	0.000133274	110	2.74628e-05	115	4.86656e-05	120	2.06628e-05	125
	5		10		15		20		25		30		35	3.60908e-05	40	3.9534e-05	45	3.63617e-05	50	2.54944e-05	55	2.83615e-05	60	4.99906e-05	65	0.00475623	70		75		80		85		90		95	2.31252e-05	100	3.52375e-05	105	2.41905e-05	110	1.38309e-05	115	4.22894e-05	120	1.47326e-05	125
	5		10		15		20		25		30		35	0.000277396	40	3.95441e-05	45	4.11196e-05	50	2.7626e-05	55	3.12194e-05	60	2.88655e-05	65	0.000313951	70		75		80		85		90		95	3.88146e-05	100	3.05392e-05	105	2.67749e-05	110	4.89911e-05	115	3.88319e-05	120	2.8926e-05	125
	5		10		15		20		25		30		35	2.23703e-05	40	2.6619e-05	45	6.17048e-05	50	1.46249e-05	55	3.33236e-05	60	9.52856e-05	65	0.000130269	70		75		80		85		90		95	3.41629e-05	100	3.87145e-05	105	2.201e-05	110	2.32964e-05	115	3.28594e-05	120	1.51768e-05	125
	5		10		15		20		25		30		35	3.84271e-05	40	2.11372e-05	45	4.35317e-05	50	1.60868e-05	55	2.89869e-05	60	6.5748e-05	65	7.68086e-05	70		75		80		85		90		95	9.26128e-05	100	1.66795e-05	105	2.24004e-05	110	2.39898e-05	115	3.11174e-05	120	1.47925e-05	125
	5		10		15		20		25		30		35	2.6539e-05	40	2.64752e-05	45	2.92982e-05	50	5.62325e-05	55	3.13509e-05	60	4.6392e-05	65	0.000246582	70		75		80		85		90		95	6.47765e-05	100	1.71134e-05	105	2.58712e-05	110	1.53977e-05	115	4.0032e-05	120	2.70354e-05	125
	5		10		15		20		25		30		35	4.16875e-05	40	2.26937e-05	45	3.44726e-05	50	4.28962e-05	55	5.09601e-05	60	4.08024e-05	65	5.07231e-05	70		75		80		85		90		95	2.43424e-05	100	3.33342e-05	105	2.8864e-05	110	3.97207e-05	115	4.14256e-05	120	1.40114e-05	125
	5		10		15		20		25		30		35	2.04322e-05	40	6.22015e-05	45	2.70284e-05	50	1.95379e-05	55	3.55161e-05	60	2.8518e-05	65	0.000229548	70		75		80		85		90		95	2.82253e-05	100	3.6949e-05	105	3.02403e-05	110	2.06373e-05	115	3.56549e-05	120	4.08001e-05	125
	5		10		15		20		25		30		35	2.07054e-05	40	2.95302e-05	45	3.55615e-05	50	1.51345e-05	55	3.33587e-05	60	2.50839e-05	65	7.7488e-05	70		75		80		85		90		95	2.11435e-05	100	0.000120747	105	7.84203e-05	110	1.53794e-05	115	7.76056e-05	120	1.6886e-05	125
	5		10		15		20		25		30		35	2.09412e-05	40	2.71242e-05	45	3.37306e-05	50	2.3185e-05	55	2.73391e-05	60	3.23754e-05	65	8.04358e-05	70		75		80		85		90		95	6.16031e-05	100	1.66734e-05	105	5.92904e-05	110	0.000134126	115	5.99842e-05	120	2.14522e-05	125
	5		10		15		20		25		30		35	2.06323e-05	40	3.1383e-05	45	3.23781e-05	50	2.22711e-05	55	2.65747e-05	60	3.75385e-05	65	0.000197286	70		75		80		85		90		95	5.57924e-05	100	4.16151e-05	105	4.44781e-05	110	4.16213e-05	115	3.9544e-05	120	2.46355e-05	125
	5		10		15		20		25		30		35	0.000147801	40	2.25619e-05	45	4.42016e-05	50	1.88531e-05	55	2.6954e-05	60	5.63631e-05	65	5.28424e-05	70		75		80		85		90		95	3.34108e-05	100	1.96368e-05	105	4.0033e-05	110	5.98234e-05	115	4.60524e-05	120	1.70016e-05	125
	5		10		15		20		25		30		35	0.000103471	40	1.94874e-05	45	5.09088e-05	50	3.58534e-05	55	6.33362e-05	60	0.000103251	65	5.76346e-05	70		75		80		85		90		95	2.29634e-05	100	1.85727e-05	105	2.08076e-05	110	2.65861e-05	115	5.12415e-05	120	1.5922e-05	125
	5		10		15		20		25		30		35	2.23438e-05	40	2.501e-05	45	2.97796e-05	50	2.17583e-05	55	4.88488e-05	60	2.87941e-05	65	0.000121481	70		75		80		85		90		95	2.33163e-05	100	2.01274e-05	105	0.000119038	110	3.53078e-05	115	4.01304e-05	120	1.55363e-05	125
	5		10		15		20		25		30		35	3.96061e-05	40	3.78381e-05	45	2.78413e-05	50	1.89911e-05	55	2.82378e-05	60	2.8694e-05	65	0.000204391	70		75		80		85		90		95	3.12963e-05	100	2.69312e-05	105	1.95881e-05	110	4.90145e-05	115	3.63515e-05	120	1.41779e-05	125
	5		10		15		20		25		30		35	2.57314e-05	40	1.84257e-05	45	6.95807e-05	50	2.02754e-05	55	3.94325e-05	60	2.64816e-05	65	7.7445e-05	70		75		80		85		90		95	3.59212e-05	100	2.21667e-05	105	2.11384e-05	110	0.00010926	115	4.03654e-05	120	2.01605e-05	125
	5		10		15		20		25		30		35	3.02142e-05	40	3.40992e-05	45	3.58457e-05	50	1.72867e-05	55	3.33122e-05	60	3.06166e-05	65	5.02629e-05	70		75		80		85		90		95	3.86897e-05	100	2.14688e-05	105	2.02165e-05	110	4.25951e-05	115	3.96954e-05	120	1.53686e-05	125
	5		10		15		20		25		30		35	2.46809e-05	40	2.55315e-05	45	3.29708e-05	50	1.33996e-05	55	4.11901e-05	60	3.10099e-05	65	8.17196e-05	70		75		80		85		90		95	2.51173e-05	100	2.40746e-05	105	2.31888e-05	110	3.30706e-05	115	4.13999e-05	120	1.39794e-05	125
	5		10		15		20		25		30		35	2.05537e-05	40	2.16805e-05	45	2.91401e-05	50	3.55357e-05	55	3.15629e-05	60	5.66813e-05	65	0.000103679	70		75		80		85		90		95	2.25118e-05	100	3.331e-05	105	2.48819e-05	110	6.67859e-05	115	2.96784e-05	120	2.29436e-05	125
	5		10		15		20		25		30		35	2.70035e-05	40	3.29935e-05	45	3.44155e-05	50	2.70289e-05	55	3.70382e-05	60	8.06722e-05	65	6.45179e-05	70		75		80		85		90		95	4.58509e-05	100	1.70041e-05	105	2.17093e-05	110	5.43935e-05	115	3.00091e-05	120	7.3776e-05	125
	5		10		15		20		25		30		35	2.26189e-05	40	2.3459e-05	45	7.75722e-05	50	1.44705e-05	55	2.92536e-05	60	2.69542e-05	65	8.042e-05	70		75		80		85		90		95	4.86986e-05	100	2.75232e-05	105	2.56358e-05	110	1.27688e-05	115	3.02704e-05	120	6.46547e-05	125
	5		10		15		20		25		30		35	2.04978e-05	40	2.21021e-05	45	5.77068e-05	50	2.01342e-05	55	4.02216e-05	60	3.98396e-05	65	6.51911e-05	70		75		80		85		90		95	0.000156243	100	1.94079e-05	105	0.000284519	110	2.764e-05	115	3.79517e-05	120	5.18212e-05	125
	5		10		15		20		25		30		35	2.03849e-05	40	2.18694e-05	45	2.87732e-05	50	2.15369e-05	55	4.18086e-05	60	3.28935e-05	65	4.93739e-05	70		75		80		85		90		95	3.43052e-05	100	1.83447e-05	105	2.43955e-05	110	3.39294e-05	115	4.10149e-05	120	2.15994e-05	125
	5		10		15		20		25		30		35	3.1687e-05	40	2.48196e-05	45	2.859e-05	50	1.56715e-05	55	3.78407e-05	60	9.27912e-05	65	0.000476656	70		75		80		85		90		95	4.24482e-05	100	5.06812e-05	105	3.06046e-05	110	3.61486e-05	115	3.14872e-05	120	5.54905e-05	125
	5		10		15		20		25		30		35	7.24015e-05	40	2.40602e-05	45	3.3334e-05	50	1.45689e-05	55	5.67679e-05	60	0.000102227	65	0.000386473	70		75		80		85		90		95	3.04023e-05	100	2.97661e-05	105	4.62898e-05	110	3.84058e-05	115	4.99616e-05	120	1.57274e-05	125
	5		10		15		20		25		30		35	8.04641e-05	40	0.000123983	45	4.91733e-05	50	2.10196e-05	55	4.60769e-05	60	2.78264e-05	65	5.5518e-05	70		75		80		85		90		95	2.16955e-05	100	1.9234e-05	105	2.17188e-05	110	1.59026e-05	115	6.93844e-05	120	1.83187e-05	125
	5		10		15		20		25		30		35	3.24679e-05	40	3.12044e-05	45	5.24849e-05	50	1.32678e-05	55	4.61054e-05	60	4.71513e-05	65	5.33262e-05	70		75		80		85		90		95	2.78327e-05	100	4.14504e-05	105	3.36559e-05	110	6.83787e-05	115	3.1142e-05	120	1.48451e-05	125
	5		10		15		20		25		30		35	4.03403e-05	40	1.97174e-05	45	3.44648e-05	50	2.28741e-05	55	3.66712e-05	60	3.42671e-05	65	4.9535e-05	70		75		80		85		90		95	2.63378e-05	100	3.26135e-05	105	9.75624e-05	110	0.000128947	115	3.50268e-05	120	1.4662e-05	125
	5		10		15		20		25		30		35	0.000155269	40	2.02014e-05	45	4.60423e-05	50	1.33414e-05	55	3.34459e-05	60	3.80296e-05	65	5.58443e-05	70		75		80		85		90		95	2.21971e-05	100	1.93232e-05	105	2.54626e-05	110	2.06236e-05	115	3.59284e-05	120	0.00011198	125
	5		10		15		20		25		30		35	2.31158e-05	40	4.15125e-05	45	2.86365e-05	50	1.67322e-05	55	3.94805e-05	60	4.62229e-05	65	6.33205e-05	70		75		80		85		90		95	3.0079e-05	100	3.08166e-05	105	1.99411e-05	110	3.21282e-05	115	3.72557e-05	120	3.68384e-05	125
	5		10		15		20		25		30		35	3.21033e-05	40	3.31453e-05	45	5.12343e-05	50	1.51164e-05	55	5.13899e-05	60	5.12841e-05	65	5.36151e-05	70		75		80		85		90		95	2.20946e-05	100	2.09439e-05	105	3.11866e-05	110	3.2763e-05	115	4.06584e-05	120	1.86468e-05	125
	5		10		15		20		25		30		35	4.21465e-05	40	4.07159e-05	45	2.80394e-05	50	2.03944e-05	55	4.82084e-05	60	5.90317e-05	65	0.000275112	70		75		80		85		90		95	2.41244e-05	100	2.03423e-05	105	2.25627e-05	110	2.44315e-05	115	3.03268e-05	120	2.62969e-05	125
	5		10		15		20		25		30		35	5.33514e-05	40	1.81359e-05	45	2.81419e-05	50	1.73593e-05	55	3.07816e-05	60	5.51797e-05	65	9.58444e-05	70		75		80		85		90		95	2.2087e-05	100	2.32675e-05	105	3.41389e-05	110	2.52145e-05	115	3.94709e-05	120	1.38642e-05	125
	5		10		15		20		25		30		35	3.30582e-05	40	3.66808e-05	45	3.98122e-05	50	1.71402e-05	55	0.00053358	60	4.78901e-05	65	9.09605e-05	70		75		80		85		90		95	0.000183179	100	2.39301e-05	105	2.04571e-05	110	2.44163e-05	115	9.07874e-05	120	1.49634e-05	125
	5		10		15		20		25		30		35	2.03587e-05	40	4.90563e-05	45	2.85243e-05	50	1.99711e-05	55	3.08999e-05	60	0.000136935	65	0.000152307	70		75		80		85		90		95	2.15109e-05	100	2.04022e-05	105	2.00541e-05	110	2.24106e-05	115	9.41761e-05	120	1.53461e-05	125
	5		10		15		20		25		30		35	0.000101413	40	3.55335e-05	45	2.73431e-05	50	1.67857e-05	55	3.12897e-05	60	0.000127807	65	0.000225635	70		75		80		85		90		95	2.23694e-05	100	1.91792e-05	105	2.35975e-05	110	1.94743e-05	115	7.94081e-05	120	1.50633e-05	125
	5		10		15		20		25		30		35	0.000116732	40	2.46029e-05	45	4.79356e-05	50	1.98303e-05	55	0.00012865	60	2.58671e-05	65	4.80404e-05	70		75		80		85		90		95	3.5375e-05	100	2.49655e-05	105	0.000247034	110	3.91045e-05	115	3.50089e-05	120	1.54115e-05	125
	5		10		15		20		25		30		35	6.24766e-05	40	3.09259e-05	45	4.49993e-05	50	2.07079e-05	55	2.68345e-05	60	3.0362e-05	65	0.000626544	70		75		80		85		90		95	0.000119144	100	2.57104e-05	105	2.13861e-05	110	1.75847e-05	115	4.053e-05	120	2.6613e-05	125
	5		10		15		20		25		30		35	2.12108e-05	40	4.85442e-05	45	3.76513e-05	50	1.96215e-05	55	4.3118e-05	60	5.40955e-05	65	0.000586215	70		75		80		85		90		95	7.12985e-05	100	1.93885e-05	105	0.000383347	110	4.95958e-05	115	3.25016e-05	120	2.1042e-05	125
	5		10		15		20		25		30		35	0.000190036	40	3.50708e-05	45	3.07325e-05	50	1.32062e-05	55	3.30258e-05	60	5.4395e-05	65	6.23129e-05	70		75		80		85		90		95	2.1284e-05	100	2.88782e-05	105	2.83561e-05	110	6.01237e-05	115	5.84724e-05	120	2.48542e-05	125
	5		10		15		20		25		30		35	5.12673e-05	40	2.1277e-05	45	3.51358e-05	50	1.41012e-05	55	2.70943e-05	60	2.90565e-05	65	5.85528e-05	70		75		80		85		90		95	2.22109e-05	100	4.54412e-05	105	2.36547e-05	110	2.42326e-05	115	3.06284e-05	120	1.54171e-05	125
	5		10		15		20		25		30		35	4.36315e-05	40	2.88758e-05	45	4.90548e-05	50	1.95512e-05	55	2.75256e-05	60	3.15412e-05	65	5.34666e-05	70		75		80		85		90		95	3.90597e-05	100	1.67728e-05	105	2.4463e-05	110	5.15435e-05	115	3.21081e-05	120	2.71896e-05	125
	5		10		15		20		25		30		35	2.3067e-05	40	5.41351e-05	45	3.92214e-05	50	2.25442e-05	55	3.06789e-05	60	3.10488e-05	65	0.000750028	70		75		80		85		90		95	6.90052e-05	100	2.60441e-05	105	2.2158e-05	110	1.45837e-05	115	4.44229e-05	120	3.53023e-05	125
	5		10		15		20		25		30		35	9.60714e-05	40	5.06512e-05	45	4.34804e-05	50	1.61572e-05	55	3.0691e-05	60	2.55529e-05	65	5.50558e-05	70		75		80		85		90		95	2.07029e-05	100	2.07139e-05	105	0.000226346	110	1.45244e-05	115	3.02928e-05	120	1.60119e-05	125
	5		10		15		20		25		30		35	7.92265e-05	40	2.90068e-05	45	3.12803e-05	50	1.96401e-05	55	3.60325e-05	60	2.52937e-05	65	5.94889e-05	70		75		80		85		90		95	2.73097e-05	100	2.70011e-05	105	0.0004741	110	1.95198e-05	115	3.10368e-05	120	1.58523e-05	125
	5		10		15		20		25		30		35	8.13858e-05	40	2.17777e-05	45	3.8428e-05	50	1.70466e-05	55	0.000353309	60	2.69963e-05	65	0.00313912	70		75		80		85		90		95	2.23833e-05	100	2.66038e-05	105	0.000225074	110	1.92655e-05	115	4.20252e-05	120	1.56358e-05	125
	5		10		15		20		25		30		35	7.15429e-05	40	3.07773e-05	45	9.05464e-05	50	2.88298e-05	55	3.75668e-05	60	2.51142e-05	65	0.00283607	70		75		80		85		90		95	3.13727e-05	100	5.34362e-05	105	5.48258e-05	110	1.75061e-05	115	4.23288e-05	120	1.40246e-05	125
	5		10		15		20		25		30		35	2.31137e-05	40	1.93265e-05	45	0.000265126	50	1.32854e-05	55	2.94116e-05	60	5.01095e-05	65	4.89447e-05	70		75		80		85		90		95	2.16716e-05	100	2.47034e-05	105	5.7228e-05	110	1.59743e-05	115	3.38306e-05	120	1.7807e-05	125
	5		10		15		20		25		30		35	3.27789e-05	40	5.49667e-05	45	5.83462e-05	50	1.79578e-05	55	2.95904e-05	60	6.54031e-05	65	0.000189077	70		75		80		85		90		95	6.04694e-05	100	1.81434e-05	105	1.96252e-05	110	3.42373e-05	115	3.61371e-05	120	1.84918e-05	125
	5		10		15		20		25		30		35	2.09601e-05	40	3.24934e-05	45	4.18485e-05	50	1.33017e-05	55	3.07076e-05	60	8.64443e-05	65	0.000530207	70		75		80		85		90		95	0.000132158	100	3.04725e-05	105	2.72975e-05	110	1.38704e-05	115	4.16117e-05	120	1.35147e-05	125
	5		10		15		20		25		30		35	7.74535e-05	40	4.13525e-05	45	3.50469e-05	50	1.36811e-05	55	2.65762e-05	60	5.7508e-05	65	0.000135274	70		75		80		85		90		95	2.06982e-05	100	1.78155e-05	105	1.98602e-05	110	3.97954e-05	115	4.47842e-05	120	1.40426e-05	125
	5		10		15		20		25		30		35	8.39597e-05	40	3.43466e-05	45	2.8443e-05	50	1.43065e-05	55	3.69553e-05	60	2.53119e-05	65	4.92373e-05	70		75		80		85		90		95	3.91877e-05	100	2.86268e-05	105	2.42462e-05	110	4.9822e-05	115	3.07215e-05	120	1.79674e-05	125
	5		10		15		20		25		30		35	0.00018482	40	2.16787e-05	45	0.000110961	50	1.3117e-05	55	3.50055e-05	60	3.57416e-05	65	0.000198894	70		75		80		85		90		95	5.97611e-05	100	3.57207e-05	105	3.31998e-05	110	4.05911e-05	115	3.34949e-05	120	1.45894e-05	125
	5		10		15		20		25		30		35	3.62019e-05	40	3.08604e-05	45	3.8269e-05	50	1.43387e-05	55	2.84038e-05	60	4.06643e-05	65	8.37453e-05	70		75		80		85		90		95	0.000120484	100	1.9902e-05	105	2.80045e-05	110	2.26611e-05	115	3.15355e-05	120	1.49137e-05	125
	5		10		15		20		25		30		35	2.29759e-05	40	1.84749e-05	45	3.39345e-05	50	1.52889e-05	55	3.81261e-05	60	3.75114e-05	65	8.84673e-05	70		75		80		85		90		95	2.38397e-05	100	3.50447e-05	105	3.58233e-05	110	5.67999e-05	115	4.12211e-05	120	1.69094e-05	125
	5		10		15		20		25		30		35	2.39649e-05	40	2.2419e-05	45	7.29742e-05	50	1.57847e-05	55	3.21934e-05	60	2.80969e-05	65	0.000181201	70		75		80		85		90		95	2.40312e-05	100	3.54975e-05	105	0.000177233	110	4.64341e-05	115	3.7297e-05	120	1.54511e-05	125
	5		10		15		20		25		30		35	2.62761e-05	40	2.75228e-05	45	4.64243e-05	50	1.33667e-05	55	4.7487e-05	60	2.83054e-05	65	0.00013141	70		75		80		85		90		95	2.15072e-05	100	3.52471e-05	105	2.00589e-05	110	1.94222e-05	115	3.29166e-05	120	1.86074e-05	125
	5		10		15		20		25		30		35	2.03512e-05	40	2.21755e-05	45	3.08657e-05	50	1.49846e-05	55	5.21987e-05	60	3.58531e-05	65	5.5602e-05	70		75		80		85		90		95	3.08616e-05	100	2.89394e-05	105	2.13148e-05	110	4.11735e-05	115	4.96526e-05	120	1.67851e-05	125
	5		10		15		20		25		30		35	3.75521e-05	40	3.23408e-05	45	3.62724e-05	50	1.44372e-05	55	3.36521e-05	60	2.99712e-05	65	9.16354e-05	70		75		80		85		90		95	2.14371e-05	100	1.73526e-05	105	2.15235e-05	110	2.86303e-05	115	4.14494e-05	120	1.62886e-05	125
	5		10		15		20		25		30		35	2.0006e-05	40	3.72589e-05	45	6.6867e-05	50	1.68546e-05	55	2.66098e-05	60	2.56655e-05	65	0.000361445	70		75		80		85		90		95	3.66021e-05	100	5.61035e-05	105	0.000118949	110	6.74636e-05	115	3.32455e-05	120	1.74506e-05	125
	5		10		15		20		25		30		35	2.19638e-05	40	5.70468e-05	45	3.34019e-05	50	1.39656e-05	55	3.28226e-05	60	4.55305e-05	65	5.71963e-05	70		75		80		85		90		95	2.05929e-05	100	1.90356e-05	105	1.99614e-05	110	2.67117e-05	115	3.71999e-05	120	1.86916e-05	125
	5		10		15		20		25		30		35	2.45367e-05	40	3.17131e-05	45	3.76087e-05	50	1.38162e-05	55	4.45724e-05	60	4.05257e-05	65	5.09813e-05	70		75		80		85		90		95	2.51138e-05	100	2.76041e-05	105	0.000312031	110	2.19206e-05	115	3.17653e-05	120	1.7858e-05	125
	5		10		15		20		25		30		35	3.51862e-05	40	0.00010034	45	4.93551e-05	50	1.80319e-05	55	3.51071e-05	60	2.77594e-05	65	0.000125177	70		75		80		85		90		95	3.58081e-05	100	3.08942e-05	105	2.72011e-05	110	2.91449e-05	115	3.97223e-05	120	2.06299e-05	125
	5		10		15		20		25		30		35	4.67466e-05	40	1.80586e-05	45	4.57538e-05	50	1.32305e-05	55	2.87857e-05	60	3.79284e-05	65	0.000381351	70		75		80		85		90		95	3.03555e-05	100	1.98276e-05	105	2.17165e-05	110	3.82198e-05	115	3.81052e-05	120	0.000116224	125
	5		10		15		20		25		30		35	3.24161e-05	40	3.57991e-05	45	3.67242e-05	50	1.45645e-05	55	3.14693e-05	60	5.58036e-05	65	0.000142373	70		75		80		85		90		95	2.74639e-05	100	2.2025e-05	105	0.000118002	110	2.45214e-05	115	3.00139e-05	120	1.40622e-05	125
	5		10		15		20		25		30		35	4.22802e-05	40	2.97482e-05	45	4.34374e-05	50	1.65979e-05	55	2.78602e-05	60	6.5038e-05	65	0.000311985	70		75		80		85		90		95	8.28757e-05	100	2.44838e-05	105	0.000125807	110	4.53529e-05	115	3.1444e-05	120	1.74531e-05	125
	5		10		15		20		25		30		35	2.61646e-05	40	4.54431e-05	45	2.93923e-05	50	1.39475e-05	55	2.65062e-05	60	2.82093e-05	65	0.000294953	70		75		80		85		90		95	2.17119e-05	100	3.24156e-05	105	5.32388e-05	110	3.88889e-05	115	3.3889e-05	120	1.4213e-05	125
	5		10		15		20		25		30		35	2.25236e-05	40	2.27765e-05	45	3.47811e-05	50	1.7604e-05	55	3.52765e-05	60	5.08998e-05	65	0.000223437	70		75		80		85		90		95	2.28776e-05	100	3.44382e-05	105	4.94778e-05	110	1.45993e-05	115	4.44143e-05	120	1.64604e-05	125
	5		10		15		20		25		30		35	2.47784e-05	40	7.81083e-05	45	4.45076e-05	50	2.16939e-05	55	3.32026e-05	60	5.88435e-05	65	5.47938e-05	70		75		80		85		90		95	2.26625e-05	100	3.20443e-05	105	2.57509e-05	110	2.75176e-05	115	3.45018e-05	120	1.55296e-05	125
	5		10		15		20		25		30		35	2.76615e-05	40	6.5272e-05	45	3.20661e-05	50	1.81157e-05	55	4.2155e-05	60	7.31925e-05	65	0.000189284	70		75		80		85		90		95	0.000168502	100	2.40252e-05	105	5.00137e-05	110	2.84518e-05	115	3.08528e-05	120	1.45975e-05	125
	5		10		15		20		25		30		35	2.29199e-05	40	3.22096e-05	45	2.749e-05	50	1.60205e-05	55	2.77946e-05	60	6.87556e-05	65	5.85321e-05	70		75		80		85		90		95	3.70089e-05	100	1.90611e-05	105	3.71796e-05	110	3.56872e-05	115	0.00078148	120	6.2151e-05	125
	5		10		15		20		25		30		35	3.45208e-05	40	6.56099e-05	45	3.27787e-05	50	2.19483e-05	55	3.10017e-05	60	7.70005e-05	65	5.03644e-05	70		75		80		85		90		95	3.34626e-05	100	3.05229e-05	105	3.04606e-05	110	2.78737e-05	115	4.39416e-05	120	1.71745e-05	125
	5		10		15		20		25		30		35	3.99525e-05	40	2.24485e-05	45	5.33729e-05	50	3.50159e-05	55	2.99046e-05	60	5.42876e-05	65	8.28692e-05	70		75		80		85		90		95	2.43751e-05	100	1.82429e-05	105	2.09295e-05	110	2.29896e-05	115	3.55058e-05	120	1.97627e-05	125
	5		10		15		20		25		30		35	0.000155275	40	2.23882e-05	45	3.58327e-05	50	2.74895e-05	55	3.15592e-05	60	4.99461e-05	65	7.96958e-05	70		75		80		85		90		95	5.03737e-05	100	2.61835e-05	105	2.02414e-05	110	1.72251e-05	115	3.19388e-05	120	0.000234577	125
	5		10		15		20		25		30		35	0.000100615	40	3.56959e-05	45	3.28287e-05	50	1.83574e-05	55	2.81291e-05	60	6.0128e-05	65	0.000104176	70		75		80		85		90		95	2.1196e-05	100	2.19378e-05	105	2.02421e-05	110	5.05616e-05	115	6.39596e-05	120	1.69878e-05	125
	5		10		15		20		25		30		35	0.000101287	40	4.31729e-05	45	3.23128e-05	50	0.000284009	55	4.35237e-05	60	5.30926e-05	65	7.42437e-05	70		75		80		85		90		95	4.58299e-05	100	1.75357e-05	105	2.51071e-05	110	2.28032e-05	115	3.79498e-05	120	1.44484e-05	125
	5		10		15		20		25		30		35	2.01663e-05	40	3.01101e-05	45	3.23616e-05	50	1.50687e-05	55	3.35939e-05	60	3.90405e-05	65	0.000292544	70		75		80		85		90		95	7.23346e-05	100	2.87231e-05	105	2.68855e-05	110	2.71601e-05	115	3.15954e-05	120	1.44293e-05	125
	5		10		15		20		25		30		35	2.85604e-05	40	2.25694e-05	45	3.31954e-05	50	1.49653e-05	55	2.85459e-05	60	3.16212e-05	65	0.000137852	70		75		80		85		90		95	2.84069e-05	100	1.68354e-05	105	0.000131095	110	1.90439e-05	115	4.47879e-05	120	1.74244e-05	125
	5		10		15		20		25		30		35	4.39781e-05	40	2.58169e-05	45	2.88514e-05	50	1.63738e-05	55	2.95663e-05	60	2.8383e-05	65	0.000337525	70		75		80		85		90		95	2.07443e-05	100	3.51949e-05	105	2.33742e-05	110	2.0103e-05	115	3.1603e-05	120	1.6405e-05	125
	5		10		15		20		25		30		35	3.85965e-05	40	5.33997e-05	45	3.29497e-05	50	2.69676e-05	55	3.17795e-05	60	5.37093e-05	65	0.000348082	70		75		80		85		90		95	3.71126e-05	100	2.7326e-05	105	4.65496e-05	110	6.54074e-05	115	7.61478e-05	120	6.60395e-05	125
	5		10		15		20		25		30		35	4.0448e-05	40	3.37711e-05	45	2.97426e-05	50	1.4017e-05	55	3.3811e-05	60	2.74076e-05	65	0.000160731	70		75		80		85		90		95	2.37642e-05	100	1.87949e-05	105	0.000110979	110	1.54867e-05	115	3.17048e-05	120	5.89411e-05	125
	5		10		15		20		25		30		35	4.60276e-05	40	3.20543e-05	45	2.8102e-05	50	1.31357e-05	55	7.83103e-05	60	3.16153e-05	65	9.26652e-05	70		75		80		85		90		95	2.54453e-05	100	3.54067e-05	105	0.000224477	110	4.60182e-05	115	5.05956e-05	120	1.38845e-05	125
	5		10		15		20		25		30		35	2.10981e-05	40	4.38392e-05	45	3.58385e-05	50	1.31553e-05	55	5.42006e-05	60	3.28892e-05	65	0.000156705	70		75		80		85		90		95	5.59831e-05	100	2.02381e-05	105	3.02331e-05	110	1.65502e-05	115	3.90092e-05	120	6.18303e-05	125
	5		10		15		20		25		30		35	3.01357e-05	40	3.09058e-05	45	0.00015783	50	2.58223e-05	55	2.82071e-05	60	2.64258e-05	65	5.22223e-05	70		75		80		85		90		95	8.85709e-05	100	1.73672e-05	105	3.36799e-05	110	1.37126e-05	115	4.21031e-05	120	1.55947e-05	125
	5		10		15		20		25		30		35	6.48622e-05	40	6.05148e-05	45	3.00154e-05	50	1.88975e-05	55	4.55515e-05	60	3.32354e-05	65	9.61689e-05	70		75		80		85		90		95	6.08686e-05	100	2.14402e-05	105	2.35149e-05	110	2.44755e-05	115	5.56386e-05	120	1.74332e-05	125
	5		10		15		20		25		30		35	2.02877e-05	40	3.65431e-05	45	5.54519e-05	50	1.642e-05	55	3.46044e-05	60	3.70776e-05	65	6.37213e-05	70		75		80		85		90		95	2.10085e-05	100	6.03163e-05	105	1.98051e-05	110	3.29763e-05	115	3.12818e-05	120	2.2177e-05	125
	5		10		15		20		25		30		35	0.000117793	40	2.14796e-05	45	3.11565e-05	50	1.53979e-05	55	3.1291e-05	60	2.79333e-05	65	0.000203686	70		75		80		85		90		95	2.38332e-05	100	2.81569e-05	105	1.98035e-05	110	2.3799e-05	115	3.86292e-05	120	1.49163e-05	125
	5		10		15		20		25		30		35	6.08592e-05	40	3.45515e-05	45	3.39389e-05	50	2.55454e-05	55	3.2504e-05	60	3.35302e-05	65	0.00251589	70		75		80		85		90		95	2.73039e-05	100	2.28648e-05	105	2.73576e-05	110	2.66207e-05	115	3.35021e-05	120	1.41761e-05	125
	5		10		15		20		25		30		35	9.61818e-05	40	5.42658e-05	45	3.52433e-05	50	1.71182e-05	55	3.60322e-05	60	3.83167e-05	65	4.84183e-05	70		75		80		85		90		95	2.18443e-05	100	2.70859e-05	105	2.14424e-05	110	2.06303e-05	115	3.45909e-05	120	1.36682e-05	125
	5		10		15		20		25		30		35	2.45983e-05	40	4.69187e-05	45	6.25739e-05	50	3.17114e-05	55	2.76299e-05	60	4.16605e-05	65	8.36258e-05	70		75		80		85		90		95	5.59168e-05	100	2.01889e-05	105	2.04993e-05	110	2.08705e-05	115	4.69996e-05	120	1.59226e-05	125
	5		10		15		20		25		30		35	7.52177e-05	40	2.42952e-05	45	2.80304e-05	50	1.59205e-05	55	3.30364e-05	60	5.68241e-05	65	0.000128541	70		75		80		85		90		95	3.0222e-05	100	1.93954e-05	105	0.000133681	110	1.84129e-05	115	5.11212e-05	120	1.6867e-05	125
	5		10		15		20		25		30		35	2.198e-05	40	7.01351e-05	45	6.7982e-05	50	1.50509e-05	55	3.0892e-05	60	6.50258e-05	65	0.000270022	70		75		80		85		90		95	2.07047e-05	100	2.03761e-05	105	0.00012852	110	3.04583e-05	115	3.67854e-05	120	2.53277e-05	125
	5		10		15		20		25		30		35	3.40288e-05	40	5.71218e-05	45	3.89751e-05	50	1.32167e-05	55	3.32151e-05	60	4.32819e-05	65	8.94589e-05	70		75		80		85		90		95	4.23108e-05	100	1.81241e-05	105	2.28355e-05	110	4.06345e-05	115	5.48112e-05	120	2.60209e-05	125
	5		10		15		20		25		30		35	3.76643e-05	40	2.88259e-05	45	3.95227e-05	50	1.79917e-05	55	2.80419e-05	60	2.50855e-05	65	0.00181731	70		75		80		85		90		95	2.44397e-05	100	1.75903e-05	105	2.83341e-05	110	3.28069e-05	115	3.73775e-05	120	6.81572e-05	125
	5		10		15		20		25		30		35	2.12812e-05	40	2.47736e-05	45	2.82462e-05	50	1.69904e-05	55	8.04558e-05	60	3.85654e-05	65	0.000241717	70		75		80		85		90		95	2.62528e-05	100	4.60045e-05	105	3.7866e-05	110	1.73753e-05	115	4.04759e-05	120	0.000163144	125
	5		10		15		20		25		30		35	2.65341e-05	40	2.16756e-05	45	2.8335e-05	50	1.35606e-05	55	3.85484e-05	60	3.93303e-05	65	9.73189e-05	70		75		80		85		90		95	2.93614e-05	100	2.81381e-05	105	4.44161e-05	110	2.68225e-05	115	5.72179e-05	120	1.44719e-05	125
	5		10		15		20		25		30		35	2.31866e-05	40	3.22758e-05	45	2.77851e-05	50	1.64952e-05	55	0.000119188	60	3.44499e-05	65	0.000113637	70		75		80		85		90		95	4.08195e-05	100	1.66587e-05	105	2.57012e-05	110	2.33663e-05	115	0.00018726	120	2.05098e-05	125
	5		10		15		20		25		30		35	0.000181809	40	2.82685e-05	45	3.24459e-05	50	1.43907e-05	55	3.65808e-05	60	2.51477e-05	65	4.76597e-05	70		75		80		85		90		95	2.08631e-05	100	1.93685e-05	105	0.000383121	110	3.28518e-05	115	4.4516e-05	120	8.60565e-05	125
	5		10		15		20		25		30		35	2.12063e-05	40	2.27379e-05	45	5.94e-05	50	1.62853e-05	55	3.87972e-05	60	3.75549e-05	65	4.84391e-05	70		75		80		85		90		95	2.49716e-05	100	2.25599e-05	105	8.3242e-05	110	6.45061e-05	115	3.58372e-05	120	9.85383e-05	125
	5		10		15		20		25		30		35	0.000170654	40	0.000162209	45	4.14364e-05	50	1.34893e-05	55	3.36147e-05	60	2.69605e-05	65	9.4374e-05	70		75		80		85		90		95	2.15568e-05	100	2.31181e-05	105	2.24181e-05	110	1.65181e-05	115	3.24301e-05	120	1.54975e-05	125
	5		10		15		20		25		30		35	0.000243818	40	2.70183e-05	45	3.25023e-05	50	1.74872e-05	55	2.95517e-05	60	0.00125115	65		70		75		80		85		90		95	2.749e-05	100	2.20455e-05	105	2.61943e-05	110	8.08453e-05	115	4.17276e-05	120	1.3951e-05	125
	5		10		15		20		25		30		35	0.000139664	40	2.79521e-05	45	3.49008e-05	50	2.07204e-05	55	0.000123993	60	4.86989e-05	65		70		75		80		85		90		95	2.62942e-05	100	2.47394e-05	105	0.000128702	110	3.35849e-05	115	3.17976e-05	120	1.45836e-05	125
	5		10		15		20		25		30		35	8.03899e-05	40	2.49809e-05	45	4.91167e-05	50	1.70322e-05	55	3.47918e-05	60	4.59379e-05	65		70		75		80		85		90		95	0.00010167	100	2.01862e-05	105	0.000105531	110	1.6791e-05	115	3.48248e-05	120	1.61073e-05	125
	5		10		15		20		25		30		35	7.36718e-05	40	3.32027e-05	45	5.89523e-05	50	2.59798e-05	55	4.12079e-05	60	6.4812e-05	65		70		75		80		85		90		95	2.9996e-05	100	2.08378e-05	105	9.88743e-05	110	1.38806e-05	115	3.90624e-05	120	2.18945e-05	125
	5		10		15		20		25		30		35	2.94587e-05	40	2.18356e-05	45	3.36807e-05	50	1.56704e-05	55	3.12994e-05	60	5.53078e-05	65		70		75		80		85		90		95	2.44957e-05	100	1.97851e-05	105	0.000122402	110	2.66616e-05	115	3.26663e-05	120	1.54703e-05	125
	5		10		15		20		25		30		35	3.44119e-05	40	2.10132e-05	45	3.52313e-05	50	1.72404e-05	55	5.19554e-05	60	3.05224e-05	65		70		75		80		85		90		95	2.09902e-05	100	1.6904e-05	105	4.46205e-05	110	2.9857e-05	115	4.42673e-05	120	1.44345e-05	125
	5		10		15		20		25		30		35	4.19327e-05	40	2.00053e-05	45	4.28765e-05	50	1.5246e-05	55	2.80253e-05	60	3.37258e-05	65		70		75		80		85		90		95	2.4597e-05	100	2.29579e-05	105	1.99534e-05	110	3.8139e-05	115	2.97572e-05	120	1.41825e-05	125
	5		10		15		20		25		30		35	0.000132732	40	2.62655e-05	45	4.24647e-05	50	1.57932e-05	55	3.34133e-05	60	4.80204e-05	65		70		75		80		85		90		95	2.39119e-05	100	2.40681e-05	105	2.4003e-05	110	4.27209e-05	115	5.74935e-05	120	7.17101e-05	125
	5		10		15		20		25		30		35	3.12642e-05	40	2.41863e-05	45	3.60342e-05	50	1.31308e-05	55	3.24638e-05	60	2.73164e-05	65		70		75		80		85		90		95	2.08406e-05	100	2.22771e-05	105	2.41375e-05	110	5.73966e-05	115	3.11638e-05	120	2.09605e-05	125
	5		10		15		20		25		30		35	2.35973e-05	40	2.90558e-05	45	2.75784e-05	50	1.74589e-05	55	3.61554e-05	60	3.5475e-05	65		70		75		80		85		90		95	2.86519e-05	100	1.91552e-05	105	6.9769e-05	110	1.75064e-05	115	3.56899e-05	120	2.50536e-05	125
	5		10		15		20		25		30		35	0.000124473	40	2.05957e-05	45	3.66514e-05	50	1.56218e-05	55	3.36409e-05	60	0.000114276	65		70		75		80		85		90		95	9.8506e-05	100	2.46099e-05	105	5.92216e-05	110	2.94905e-05	115	3.14133e-05	120	6.1071e-05	125
	5		10		15		20		25		30		35	0.000196789	40	4.11679e-05	45	3.75485e-05	50	1.56961e-05	55	8.02965e-05	60	5.15454e-05	65		70		75		80		85		90		95	2.1256e-05	100	3.23089e-05	105	0.00024022	110	7.69139e-05	115	3.21973e-05	120	5.67832e-05	125
	5		10		15		20		25		30		35	5.99801e-05	40	2.01091e-05	45	5.59411e-05	50	1.52917e-05	55	4.20815e-05	60	3.02546e-05	65		70		75		80		85		90		95	2.86394e-05	100	2.70675e-05	105	2.4109e-05	110	2.2551e-05	115	3.73875e-05	120	1.50316e-05	125
	5		10		15		20		25		30		35	6.5428e-05	40	2.35541e-05	45	4.45479e-05	50	1.42661e-05	55	2.80416e-05	60	2.75698e-05	65		70		75		80		85		90		95	3.54485e-05	100	1.94194e-05	105	0.000199718	110	3.00062e-05	115	5.00532e-05	120	1.70803e-05	125
	5		10		15		20		25		30		35	3.84071e-05	40	3.43858e-05	45	5.51758e-05	50	1.65648e-05	55	3.49608e-05	60	4.07451e-05	65		70		75		80		85		90		95	3.82073e-05	100	2.19285e-05	105	2.51209e-05	110	2.80029e-05	115	6.84683e-05	120	6.90316e-05	125
	5		10		15		20		25		30		35	3.93165e-05	40	3.51201e-05	45	5.79349e-05	50	1.59385e-05	55	4.94289e-05	60	2.76348e-05	65		70		75		80		85		90		95	3.61837e-05	100	3.48827e-05	105	3.52874e-05	110	5.0523e-05	115	3.88793e-05	120	2.57245e-05	125
	5		10		15		20		25		30		35	0.000139841	40	3.45992e-05	45	5.11686e-05	50	1.46572e-05	55	3.9722e-05	60	3.03335e-05	65		70		75		80		85		90		95	2.80606e-05	100	1.66733e-05	105	2.58871e-05	110	3.12878e-05	115	4.28893e-05	120	2.48777e-05	125
	5		10		15		20		25		30		35	2.86012e-05	40	1.97853e-05	45	3.06921e-05	50	0.000158732	55	2.67375e-05	60	2.81731e-05	65		70		75		80		85		90		95	2.5489e-05	100	1.74815e-05	105	0.000135583	110	2.78319e-05	115	3.39781e-05	120	2.61375e-05	125
	5		10		15		20		25		30		35	4.54342e-05	40	2.42794e-05	45	6.86075e-05	50	2.36978e-05	55	3.1554e-05	60	3.4628e-05	65		70		75		80		85		90		95	2.35052e-05	100	0.000121438	105	1.97278e-05	110	3.74733e-05	115	3.00331e-05	120	1.60856e-05	125
	5		10		15		20		25		30		35	2.1458e-05	40	2.1251e-05	45	0.000164814	50	2.22346e-05	55	3.11662e-05	60	3.82645e-05	65		70		75		80		85		90		95	5.9038e-05	100	3.22893e-05	105	2.33812e-05	110	4.47546e-05	115	4.65404e-05	120	0.000127739	125
	5		10		15		20		25		30		35	3.44974e-05	40	2.80047e-05	45	0.000135508	50	1.39463e-05	55	3.46759e-05	60	4.80954e-05	65		70		75		80		85		90		95	2.05555e-05	100	1.77021e-05	105	2.5006e-05	110	2.39537e-05	115	4.39222e-05	120	1.44622e-05	125
	5		10		15		20		25		30		35	2.08357e-05	40	9.25112e-05	45	0.000128785	50	1.58672e-05	55	3.72913e-05	60	3.70433e-05	65		70		75		80		85		90		95	2.40614e-05	100	2.10798e-05	105	2.38981e-05	110	2.67155e-05	115	3.92874e-05	120	1.42159e-05	125
	5		10		15		20		25		30		35	4.63452e-05	40	7.10425e-05	45	0.000148937	50	1.35181e-05	55	3.04519e-05	60	4.06354e-05	65		70		75		80		85		90		95	0.000248212	100	2.88826e-05	105	3.04646e-05	110	2.77986e-05	115	7.13012e-05	120	1.50764e-05	125
	5		10		15		20		25		30		35	4.78915e-05	40	2.14703e-05	45	2.87894e-05	50	1.77907e-05	55	2.67566e-05	60	4.05381e-05	65		70		75		80		85		90		95	2.25077e-05	100	4.06895e-05	105	2.38887e-05	110	2.11587e-05	115	4.15068e-05	120	1.38926e-05	125
	5		10		15		20		25		30		35	4.0269e-05	40	2.3676e-05	45	3.92997e-05	50	1.87627e-05	55	3.89402e-05	60	3.09969e-05	65		70		75		80		85		90		95	7.5272e-05	100	5.88403e-05	105	3.25121e-05	110	2.04049e-05	115	3.04906e-05	120	1.98023e-05	125
	5		10		15		20		25		30		35	0.000264598	40	0.000106697	45	3.92561e-05	50	2.33072e-05	55	2.66798e-05	60	2.63542e-05	65		70		75		80		85		90		95	8.38873e-05	100	1.83679e-05	105	2.35651e-05	110	1.2408e-05	115	3.45479e-05	120	1.63674e-05	125
	5		10		15		20		25		30		35	2.2379e-05	40	3.21371e-05	45	2.89616e-05	50	1.53357e-05	55	3.69643e-05	60	3.47872e-05	65		70		75		80		85		90		95	0.000117318	100	2.30484e-05	105	0.000203924	110	1.60167e-05	115	4.31542e-05	120	1.38426e-05	125
	5		10		15		20		25		30		35	3.25451e-05	40	2.63299e-05	45	6.62388e-05	50	2.436e-05	55	2.79004e-05	60	6.83208e-05	65		70		75		80		85		90		95	5.9693e-05	100	3.38752e-05	105	2.41785e-05	110	1.77818e-05	115	3.37271e-05	120	1.59747e-05	125
	5		10		15		20		25		30		35	4.84089e-05	40	2.24447e-05	45	5.13915e-05	50	2.29994e-05	55	2.8974e-05	60	5.27217e-05	65		70		75		80		85		90		95	6.9328e-05	100	1.95622e-05	105	0.000383849	110	3.10065e-05	115	7.00574e-05	120	1.90043e-05	125
	5		10		15		20		25		30		35	4.41817e-05	40	3.30022e-05	45	3.17571e-05	50	1.33394e-05	55	2.76479e-05	60	2.55807e-05	65		70		75		80		85		90		95	4.2713e-05	100	2.60317e-05	105	0.000106909	110	2.20023e-05	115	3.41944e-05	120	2.24702e-05	125
	5		10		15		20		25		30		35	2.67889e-05	40	3.96607e-05	45	3.05012e-05	50	2.08252e-05	55	3.28255e-05	60	3.68969e-05	65		70		75		80		85		90		95	2.24604e-05	100	0.000157545	105	3.81274e-05	110	1.59867e-05	115	4.47376e-05	120	2.01061e-05	125
	5		10		15		20		25		30		35	0.000128476	40	7.19877e-05	45	3.87845e-05	50	1.85202e-05	55	2.99179e-05	60	3.81088e-05	65		70		75		80		85		90		95	6.20918e-05	100	2.30427e-05	105	0.000627444	110	2.34977e-05	115	5.48091e-05	120	1.68433e-05	125
	5		10		15		20		25		30		35	2.0837e-05	40	7.26913e-05	45	2.92889e-05	50	1.37723e-05	55	2.67663e-05	60	5.51881e-05	65		70		75		80		85		90		95	2.69019e-05	100	2.71333e-05	105	3.34256e-05	110	2.38898e-05	115	3.86355e-05	120	1.71438e-05	125
	5		10		15		20		25		30		35	2.02193e-05	40	2.26972e-05	45	3.36794e-05	50	1.32751e-05	55	2.85028e-05	60	2.61908e-05	65		70		75		80		85		90		95	3.13099e-05	100	3.07376e-05	105	3.34917e-05	110	1.50916e-05	115	0.000156785	120	1.58872e-05	125
	5		10		15		20		25		30		35	3.96646e-05	40	4.35039e-05	45	0.000213227	50	1.30923e-05	55	3.68408e-05	60	5.3512e-05	65		70		75		80		85		90		95	2.53716e-05	100	1.9965e-05	105	4.31341e-05	110	3.52268e-05	115	3.26376e-05	120	1.86722e-05	125
	5		10		15		20		25		30		35	4.24023e-05	40	4.66476e-05	45	3.72674e-05	50	1.86746e-05	55	5.42632e-05	60	2.87565e-05	65		70		75		80		85		90		95	3.59785e-05	100	3.17478e-05	105	2.71919e-05	110	3.98161e-05	115	3.90565e-05	120	1.68399e-05	125
	5		10		15		20		25		30		35	0.000167219	40	6.11226e-05	45	4.14482e-05	50	6.55436e-05	55	3.94598e-05	60	2.53893e-05	65		70		75		80		85		90		95	2.24539e-05	100	2.20584e-05	105	2.71591e-05	110	4.06197e-05	115	4.25324e-05	120	1.70017e-05	125
	5		10		15		20		25		30		35	2.08343e-05	40	4.04795e-05	45	4.37741e-05	50	1.75598e-05	55	2.86572e-05	60	3.35028e-05	65		70		75		80		85		90		95	3.67631e-05	100	1.67979e-05	105	0.000622104	110	3.81669e-05	115	3.52492e-05	120	2.53061e-05	125
	5		10		15		20		25		30		35	6.53942e-05	40	4.29573e-05	45	6.43577e-05	50	1.33466e-05	55	3.00526e-05	60	3.84619e-05	65		70		75		80		85		90		95	0.000109425	100	2.88534e-05	105	0.000153331	110	3.19339e-05	115	3.32852e-05	120	1.61072e-05	125
	5		10		15		20		25		30		35	3.15624e-05	40	7.60121e-05	45	4.4436e-05	50	1.50138e-05	55	3.96271e-05	60	3.53406e-05	65		70		75		80		85		90		95	0.000148753	100	1.7451e-05	105	9.26437e-05	110	4.95139e-05	115	4.06468e-05	120	1.5411e-05	125
	5		10		15		20		25		30		35	3.41215e-05	40	2.55119e-05	45	3.02251e-05	50	2.03473e-05	55	3.93974e-05	60	3.41462e-05	65		70		75		80		85		90		95	6.81785e-05	100	3.79812e-05	105	8.16119e-05	110	3.98087e-05	115	3.66964e-05	120	1.56673e-05	125
	5		10		15		20		25		30		35	3.02973e-05	40	1.80153e-05	45	3.11806e-05	50	1.37054e-05	55	2.86399e-05	60	3.50567e-05	65		70		75		80		85		90		95	7.79766e-05	100	1.67032e-05	105	1.97191e-05	110	1.34778e-05	115	4.53758e-05	120	6.63894e-05	125
	5		10		15		20		25		30		35	0.000165575	40	2.00056e-05	45	0.000465495	50	1.32759e-05	55	3.51846e-05	60	3.53166e-05	65		70		75		80		85		90		95	2.88301e-05	100	2.78661e-05	105	0.000248306	110	5.82539e-05	115	3.22815e-05	120	1.68076e-05	125
	5		10		15		20		25		30		35	2.85159e-05	40	3.30922e-05	45	2.90063e-05	50	2.02748e-05	55	4.60232e-05	60	3.10543e-05	65		70		75		80		85		90		95	2.05671e-05	100	4.25623e-05	105	2.19386e-05	110	6.28681e-05	115	3.15091e-05	120	5.56204e-05	125
	5		10		15		20		25		30		35	4.21169e-05	40	2.26143e-05	45	4.65412e-05	50	1.53246e-05	55	3.26039e-05	60	2.91536e-05	65		70		75		80		85		90		95	2.78425e-05	100	3.04551e-05	105	0.000351882	110	1.77885e-05	115	3.0622e-05	120	3.42354e-05	125
	5		10		15		20		25		30		35	3.47831e-05	40	1.92435e-05	45	3.65652e-05	50	1.32685e-05	55	3.55589e-05	60	4.4803e-05	65		70		75		80		85		90		95	2.72276e-05	100	1.82074e-05	105	2.37398e-05	110	1.41049e-05	115	7.24165e-05	120	1.66698e-05	125
	5		10		15		20		25		30		35	0.000118261	40	1.92976e-05	45	3.36861e-05	50	1.4688e-05	55	2.90605e-05	60	6.99393e-05	65		70		75		80		85		90		95	2.61851e-05	100	1.87063e-05	105	3.7526e-05	110	4.01779e-05	115	3.31309e-05	120	1.52686e-05	125
	5		10		15		20		25		30		35	7.62639e-05	40	2.3493e-05	45	3.99855e-05	50	1.41927e-05	55	4.10454e-05	60	2.70382e-05	65		70		75		80		85		90		95	0.000182763	100	1.75534e-05	105	2.00998e-05	110	1.217e-05	115	3.43289e-05	120	1.76155e-05	125
	5		10		15		20		25		30		35	2.5114e-05	40	3.57384e-05	45	2.92496e-05	50	1.32035e-05	55	8.20461e-05	60	3.15809e-05	65		70		75		80		85		90		95	2.12195e-05	100	1.74683e-05	105	0.000141112	110	2.20279e-05	115	3.46812e-05	120	1.4754e-05	125
	5		10		15		20		25		30		35	2.95046e-05	40	2.78602e-05	45	2.68386e-05	50	1.49103e-05	55	3.11134e-05	60	3.4955e-05	65		70		75		80		85		90		95	2.46189e-05	100	4.36019e-05	105	5.02855e-05	110	3.86015e-05	115	0.000651733	120	1.48762e-05	125
	5		10		15		20		25		30		35	2.96772e-05	40	2.46655e-05	45	3.59619e-05	50	1.49134e-05	55	4.61504e-05	60	2.89112e-05	65		70		75		80		85		90		95	4.53895e-05	100	5.07855e-05	105	3.38031e-05	110	1.50606e-05	115	0.00011867	120	1.49085e-05	125
	5		10		15		20		25		30		35	2.88894e-05	40	0.000372597	45	3.02229e-05	50	2.02128e-05	55	2.66157e-05	60	2.81776e-05	65		70		75		80		85		90		95	2.24206e-05	100	3.44647e-05	105	3.26542e-05	110	1.46586e-05	115	3.2285e-05	120	1.54455e-05	125
	5		10		15		20		25		30		35	5.16742e-05	40	2.77719e-05	45	4.63411e-05	50	1.38153e-05	55	3.96568e-05	60	5.88782e-05	65		70		75		80		85		90		95	2.4292e-05	100	2.11846e-05	105	2.13368e-05	110	1.20108e-05	115	3.98268e-05	120	2.53466e-05	125
	5		10		15		20		25		30		35	2.33179e-05	40	3.02849e-05	45	3.90485e-05	50	1.38315e-05	55	3.05351e-05	60	5.11693e-05	65		70		75		80		85		90		95	2.88877e-05	100	7.99787e-05	105	2.45879e-05	110	2.08653e-05	115	3.14738e-05	120	1.81548e-05	125
	5		10		15		20		25		30		35	2.60754e-05	40	3.48571e-05	45	4.35883e-05	50	0.000159529	55	3.69385e-05	60	2.52528e-05	65		70		75		80		85		90		95	4.56129e-05	100	2.32631e-05	105	3.74696e-05	110	3.72942e-05	115	3.69585e-05	120	1.79924e-05	125
	5		10		15		20		25		30		35	7.04302e-05	40	2.23195e-05	45	2.66226e-05	50	3.65805e-05	55	6.01162e-05	60	2.50162e-05	65		70		75		80		85		90		95	2.43324e-05	100	1.74453e-05	105	3.5254e-05	110	2.3312e-05	115	3.03507e-05	120	1.99703e-05	125
	5		10		15		20		25		30		35	2.1719e-05	40	3.24592e-05	45	3.61896e-05	50	1.42378e-05	55	9.26285e-05	60	2.61181e-05	65		70		75		80		85		90		95	7.44297e-05	100	1.82439e-05	105	0.000140903	110	4.24981e-05	115	3.34653e-05	120	1.44267e-05	125
	5		10		15		20		25		30		35	2.71187e-05	40	2.71031e-05	45	0.000289678	50	1.42015e-05	55	5.23002e-05	60	2.99773e-05	65		70		75		80		85		90		95	2.24135e-05	100	0.000101676	105	2.43904e-05	110	5.47307e-05	115	3.09473e-05	120	1.58875e-05	125
	5		10		15		20		25		30		35	2.86859e-05	40	3.17208e-05	45	2.8731e-05	50	1.31686e-05	55	2.89749e-05	60	3.78505e-05	65		70		75		80		85		90		95	2.09538e-05	100	6.03749e-05	105	2.12931e-05	110	2.01467e-05	115	4.07665e-05	120	1.66857e-05	125
	5		10		15		20		25		30		35	2.05962e-05	40	3.49941e-05	45	3.71286e-05	50	2.05992e-05	55	3.06897e-05	60	3.35971e-05	65		70		75		80		85		90		95	2.5637e-05	100	3.64852e-05	105	1.99687e-05	110	1.5739e-05	115	3.86635e-05	120	2.95163e-05	125
	5		10		15		20		25		30		35	3.70492e-05	40	2.6338e-05	45	8.82449e-05	50	5.99177e-05	55	3.38714e-05	60	3.84274e-05	65		70		75		80		85		90		95	5.83505e-05	100	2.18202e-05	105	3.37902e-05	110	1.88239e-05	115	0.000234576	120	1.88813e-05	125
	5		10		15		20		25		30		35	2.68515e-05	40	2.6603e-05	45	8.77184e-05	50	1.35846e-05	55	2.88686e-05	60	3.32803e-05	65		70		75		80		85		90		95	2.57317e-05	100	4.42783e-05	105	2.23357e-05	110	0.000108877	115	3.81963e-05	120	2.13546e-05	125
	5		10		15		20		25		30		35	2.74724e-05	40	4.993e-05	45	2.89929e-05	50	1.33271e-05	55	7.61562e-05	60	2.66614e-05	65		70		75		80		85		90		95	2.14691e-05	100	1.72064e-05	105	0.000157354	110	3.49779e-05	115	4.00875e-05	120	1.79441e-05	125
	5		10		15		20		25		30		35	2.56359e-05	40	2.3522e-05	45	0.000107165	50	1.35152e-05	55	6.71029e-05	60	2.87026e-05	65		70		75		80		85		90		95	4.3741e-05	100	2.18031e-05	105	0.000110747	110	3.70626e-05	115	3.29838e-05	120	2.77558e-05	125
	5		10		15		20		25		30		35	4.9991e-05	40	2.68079e-05	45	3.89825e-05	50	1.58115e-05	55	2.98299e-05	60	3.00721e-05	65		70		75		80		85		90		95	0.000125768	100	2.1899e-05	105	1.99233e-05	110	2.77325e-05	115	7.28995e-05	120	1.56118e-05	125
	5		10		15		20		25		30		35	2.36656e-05	40	2.456e-05	45	3.15003e-05	50	1.55426e-05	55	4.62402e-05	60	4.10784e-05	65		70		75		80		85		90		95	8.31512e-05	100	2.26957e-05	105	0.00013373	110	5.41045e-05	115	3.25379e-05	120	0.000226663	125
	5		10		15		20		25		30		35	2.88325e-05	40	1.97964e-05	45	0.000150346	50	1.35684e-05	55	5.34814e-05	60	3.31232e-05	65		70		75		80		85		90		95	4.80119e-05	100	2.57613e-05	105	1.95271e-05	110	3.0846e-05	115	4.33538e-05	120	1.3566e-05	125
	5		10		15		20		25		30		35	2.53121e-05	40	1.90737e-05	45	3.92967e-05	50	1.39171e-05	55	2.9239e-05	60	2.7821e-05	65		70		75		80		85		90		95	2.21688e-05	100	2.13197e-05	105	5.77761e-05	110	1.50799e-05	115	3.05089e-05	120	5.96992e-05	125
	5		10		15		20		25		30		35	6.70289e-05	40	3.61386e-05	45	2.7809e-05	50	1.35153e-05	55	3.64413e-05	60	5.31239e-05	65		70		75		80		85		90		95	3.10524e-05	100	4.30738e-05	105	5.17846e-05	110	4.77605e-05	115	3.6567e-05	120	1.8268e-05	125
	5		10		15		20		25		30		35	2.00313e-05	40	3.15124e-05	45	2.84868e-05	50	1.32455e-05	55	3.09744e-05	60	3.48542e-05	65		70		75		80		85		90		95	2.25962e-05	100	2.15912e-05	105	2.24171e-05	110	1.8027e-05	115	3.62751e-05	120	1.45218e-05	125
	5		10		15		20		25		30		35	2.26156e-05	40	3.49743e-05	45	3.16556e-05	50	1.37154e-05	55	2.84397e-05	60	2.59288e-05	65		70		75		80		85		90		95	3.67087e-05	100	2.80451e-05	105	2.39086e-05	110	1.39349e-05	115	3.75914e-05	120	9.15874e-05	125
	5		10		15		20		25		30		35	7.78289e-05	40	1.88843e-05	45	2.80655e-05	50	1.35557e-05	55	4.48112e-05	60	6.80456e-05	65		70		75		80		85		90		95	5.59078e-05	100	3.2318e-05	105	4.15749e-05	110	1.88319e-05	115	2.96891e-05	120	7.18854e-05	125
	5		10		15		20		25		30		35	6.54857e-05	40	1.97905e-05	45	3.43365e-05	50	1.35633e-05	55	4.18216e-05	60	7.17298e-05	65		70		75		80		85		90		95	4.07285e-05	100	2.01659e-05	105	7.08554e-05	110	1.78813e-05	115	3.22882e-05	120	2.15854e-05	125
	5		10		15		20		25		30		35	2.7867e-05	40	3.47237e-05	45	3.03805e-05	50	2.15975e-05	55	4.278e-05	60	5.89085e-05	65		70		75		80		85		90		95	2.26857e-05	100	2.02014e-05	105	7.04641e-05	110	1.20956e-05	115	2.95384e-05	120	1.35927e-05	125
	5		10		15		20		25		30		35	4.12283e-05	40	6.49798e-05	45	3.54343e-05	50	1.87527e-05	55	3.12715e-05	60	3.98175e-05	65		70		75		80		85		90		95	6.1607e-05	100	1.81723e-05	105	3.95112e-05	110	2.75613e-05	115	3.38946e-05	120	1.63398e-05	125
	5		10		15		20		25		30		35	0.000231056	40	7.0724e-05	45	3.91848e-05	50	1.49642e-05	55	2.93774e-05	60	2.94687e-05	65		70		75		80		85		90		95	2.69752e-05	100	1.94721e-05	105	2.34936e-05	110	2.84068e-05	115	3.12814e-05	120	1.82202e-05	125
	5		10		15		20		25		30		35	2.26432e-05	40	5.83585e-05	45	4.49381e-05	50	2.41532e-05	55	3.86738e-05	60	4.20586e-05	65		70		75		80		85		90		95	6.07153e-05	100	2.53987e-05	105	2.19621e-05	110	0.000114046	115	3.74136e-05	120	2.15667e-05	125
	5		10		15		20		25		30		35	6.04348e-05	40	2.25341e-05	45	4.45394e-05	50	3.81641e-05	55	3.29285e-05	60	2.5777e-05	65		70		75		80		85		90		95	2.26974e-05	100	2.62784e-05	105	2.38879e-05	110	2.8714e-05	115	3.40081e-05	120	1.43797e-05	125
	5		10		15		20		25		30		35	2.51508e-05	40	2.70448e-05	45	3.33122e-05	50	1.52652e-05	55	0.000168305	60	3.79873e-05	65		70		75		80		85		90		95	3.72024e-05	100	3.02146e-05	105	2.58864e-05	110	1.42085e-05	115	4.88029e-05	120	2.00603e-05	125
	5		10		15		20		25		30		35	3.64705e-05	40	4.20369e-05	45	4.91417e-05	50	2.22016e-05	55	5.21806e-05	60	3.18296e-05	65		70		75		80		85		90		95	3.54121e-05	100	5.77038e-05	105	2.31007e-05	110	2.69352e-05	115	7.07637e-05	120	1.79248e-05	125
	5		10		15		20		25		30		35	3.97032e-05	40	2.57867e-05	45	4.64204e-05	50	1.91609e-05	55	3.04279e-05	60	2.68037e-05	65		70		75		80		85		90		95	2.85745e-05	100	3.8239e-05	105	2.32507e-05	110	6.44306e-05	115	0.000154089	120	1.91615e-05	125
	5		10		15		20		25		30		35	2.84888e-05	40	2.28308e-05	45	2.71123e-05	50	1.58972e-05	55	3.87911e-05	60	2.63785e-05	65		70		75		80		85		90		95	2.20918e-05	100	1.76844e-05	105	2.02977e-05	110	2.35131e-05	115	4.28241e-05	120	1.56708e-05	125
	5		10		15		20		25		30		35	4.13926e-05	40	7.01475e-05	45	3.37288e-05	50	1.86847e-05	55	3.00366e-05	60	3.9155e-05	65		70		75		80		85		90		95	2.10063e-05	100	1.97698e-05	105	2.41821e-05	110	2.33419e-05	115	3.32032e-05	120	1.35089e-05	125
	5		10		15		20		25		30		35	2.54212e-05	40	3.65545e-05	45	3.33592e-05	50	1.30058e-05	55	4.25571e-05	60	2.90123e-05	65		70		75		80		85		90		95	2.1543e-05	100	2.57928e-05	105	2.2779e-05	110	4.60429e-05	115	2.96782e-05	120	0.000112283	125
	5		10		15		20		25		30		35	3.23739e-05	40	3.21152e-05	45	3.341e-05	50	1.53109e-05	55	3.80637e-05	60	3.215e-05	65		70		75		80		85		90		95	3.29825e-05	100	2.01261e-05	105	0.000159692	110	3.17294e-05	115	0.000130732	120	1.41936e-05	125
	5		10		15		20		25		30		35	6.70549e-05	40	2.08433e-05	45	2.86506e-05	50	1.32934e-05	55	5.54345e-05	60	5.51929e-05	65		70		75		80		85		90		95	0.000124419	100	3.1424e-05	105	1.9849e-05	110	4.1312e-05	115	3.2064e-05	120	1.48593e-05	125
	5		10		15		20		25		30		35	9.47141e-05	40	2.86183e-05	45	0.000653345	50	1.33989e-05	55	4.16439e-05	60	4.72095e-05	65		70		75		80		85		90		95	8.47524e-05	100	1.75388e-05	105	4.22035e-05	110	5.06275e-05	115	3.76289e-05	120	0.000183083	125
	5		10		15		20		25		30		35	2.67913e-05	40	3.63754e-05	45	3.06983e-05	50	1.8566e-05	55	2.99256e-05	60	3.44105e-05	65		70		75		80		85		90		95	2.15323e-05	100	2.48423e-05	105	2.20802e-05	110	1.29477e-05	115	3.65191e-05	120	1.42153e-05	125
	5		10		15		20		25		30		35	2.76725e-05	40	2.53506e-05	45	3.37195e-05	50	1.9032e-05	55	4.61269e-05	60	5.16466e-05	65		70		75		80		85		90		95	0.00017075	100	1.95341e-05	105	2.11599e-05	110	2.15539e-05	115	3.16282e-05	120	1.36206e-05	125
	5		10		15		20		25		30		35	2.80895e-05	40	3.07416e-05	45	3.08619e-05	50	1.48412e-05	55	2.99368e-05	60	2.70516e-05	65		70		75		80		85		90		95	5.17874e-05	100	4.35569e-05	105	3.38107e-05	110	4.44622e-05	115	3.60804e-05	120	1.40604e-05	125
	5		10		15		20		25		30		35	0.00204883	40	2.00592e-05	45	2.78174e-05	50	1.91288e-05	55	2.86752e-05	60	3.09617e-05	65		70		75		80		85		90		95	3.17903e-05	100	2.24019e-05	105	5.42628e-05	110	4.65341e-05	115	4.94897e-05	120	1.48242e-05	125
	5		10		15		20		25		30		35	6.84819e-05	40	2.95915e-05	45	2.81594e-05	50	1.87017e-05	55	2.67279e-05	60	3.28721e-05	65		70		75		80		85		90		95	2.10209e-05	100	1.76601e-05	105	4.67231e-05	110	2.27631e-05	115	4.62184e-05	120	1.57503e-05	125
	5		10		15		20		25		30		35	4.75777e-05	40	1.89975e-05	45	3.24946e-05	50	2.7182e-05	55	4.58487e-05	60	3.35978e-05	65		70		75		80		85		90		95	3.00129e-05	100	1.76387e-05	105	2.18794e-05	110	8.54255e-05	115	3.12258e-05	120	1.80506e-05	125
	5		10		15		20		25		30		35	2.16341e-05	40	9.62888e-05	45	4.14717e-05	50	1.91506e-05	55	3.35293e-05	60	3.6698e-05	65		70		75		80		85		90		95	3.02161e-05	100	1.73592e-05	105	2.15518e-05	110	6.11768e-05	115	3.69074e-05	120	1.35312e-05	125
	5		10		15		20		25		30		35	4.21521e-05	40	2.59906e-05	45	7.26226e-05	50	1.67933e-05	55	3.03868e-05	60	2.78331e-05	65		70		75		80		85		90		95	3.06677e-05	100	2.8298e-05	105	1.99152e-05	110	5.03375e-05	115	0.000104693	120	1.45139e-05	125
	5		10		15		20		25		30		35	2.96893e-05	40	2.40525e-05	45	4.55168e-05	50	1.48731e-05	55	2.66318e-05	60	2.88435e-05	65		70		75		80		85		90		95	4.45312e-05	100	3.061e-05	105	2.0392e-05	110	2.37834e-05	115	4.01563e-05	120	1.92754e-05	125
	5		10		15		20		25		30		35	2.27374e-05	40	3.05172e-05	45	4.51886e-05	50	1.48226e-05	55	3.01352e-05	60	4.18254e-05	65		70		75		80		85		90		95	2.08939e-05	100	2.19917e-05	105	2.55372e-05	110	5.98005e-05	115	3.16562e-05	120	1.56348e-05	125
	5		10		15		20		25		30		35	6.66726e-05	40	4.43544e-05	45	3.22633e-05	50	1.55489e-05	55	2.77006e-05	60	3.20598e-05	65		70		75		80		85		90		95	2.44757e-05	100	1.78811e-05	105	0.000141884	110	3.4605e-05	115	4.08978e-05	120	1.4324e-05	125
	5		10		15		20		25		30		35	2.36665e-05	40	3.80735e-05	45	3.38359e-05	50	1.63277e-05	55	2.66342e-05	60	3.72574e-05	65		70		75		80		85		90		95	2.07273e-05	100	2.88223e-05	105	2.31134e-05	110	2.31664e-05	115	5.01769e-05	120	2.25161e-05	125
	5		10		15		20		25		30		35	2.08329e-05	40	5.32502e-05	45	3.52493e-05	50	1.31009e-05	55	2.79435e-05	60	4.09862e-05	65		70		75		80		85		90		95	2.11003e-05	100	0.000111612	105	2.30524e-05	110	3.82788e-05	115	3.63009e-05	120	2.32594e-05	125
	5		10		15		20		25		30		35	4.22723e-05	40	2.15456e-05	45	4.29924e-05	50	1.44946e-05	55	3.37359e-05	60	2.52602e-05	65		70		75		80		85		90		95	2.96876e-05	100	0.000124045	105	2.53227e-05	110	5.35897e-05	115	3.95228e-05	120	1.37639e-05	125
	5		10		15		20		25		30		35	6.48855e-05	40	2.21585e-05	45	3.79429e-05	50	1.35606e-05	55	3.49667e-05	60	2.72083e-05	65		70		75		80		85		90		95	3.16313e-05	100	3.17792e-05	105	2.06653e-05	110	1.39699e-05	115	3.92874e-05	120	1.46424e-05	125
	5		10		15		20		25		30		35	4.273e-05	40	1.83524e-05	45	2.85063e-05	50	1.61956e-05	55	2.84363e-05	60	3.18502e-05	65		70		75		80		85		90		95	3.48427e-05	100	2.97476e-05	105	2.59693e-05	110	2.65901e-05	115	4.20273e-05	120	4.7763e-05	125
	5		10		15		20		25		30		35	3.71941e-05	40	2.1014e-05	45	3.71404e-05	50	1.58262e-05	55	4.59189e-05	60	8.95542e-05	65		70		75		80		85		90		95	2.16942e-05	100	5.24381e-05	105	2.48778e-05	110	6.16996e-05	115	5.27452e-05	120	2.81489e-05	125
	5		10		15		20		25		30		35	9.34166e-05	40	2.29414e-05	45	3.16913e-05	50	1.95781e-05	55	2.81565e-05	60	6.96895e-05	65		70		75		80		85		90		95	2.48196e-05	100	1.91533e-05	105	0.000880288	110	2.84764e-05	115	3.2444e-05	120	4.77893e-05	125
	5		10		15		20		25		30		35	2.16288e-05	40	9.83934e-05	45	2.87529e-05	50	1.85331e-05	55	3.24678e-05	60	4.40306e-05	65		70		75		80		85		90		95	0.000140259	100	2.0691e-05	105	2.32857e-05	110	2.60196e-05	115	4.13063e-05	120	1.62707e-05	125
	5		10		15		20		25		30		35	2.99877e-05	40	3.75124e-05	45	5.29967e-05	50	3.09974e-05	55	3.7895e-05	60	2.99727e-05	65		70		75		80		85		90		95	2.46694e-05	100	1.74506e-05	105	1.97453e-05	110	2.1434e-05	115	4.47925e-05	120	4.63855e-05	125
	5		10		15		20		25		30		35	2.14383e-05	40	2.45033e-05	45	2.98841e-05	50	1.44343e-05	55	5.05837e-05	60	3.30483e-05	65		70		75		80		85		90		95	2.62296e-05	100	4.02033e-05	105	2.21868e-05	110	1.79785e-05	115	3.02552e-05	120	1.41119e-05	125
	5		10		15		20		25		30		35	4.02765e-05	40	2.45144e-05	45	0.000167332	50	2.42966e-05	55	3.34142e-05	60	4.43603e-05	65		70		75		80		85		90		95	7.61099e-05	100	2.88002e-05	105	2.56391e-05	110	4.11936e-05	115	3.37719e-05	120	2.45588e-05	125
	5		10		15		20		25		30		35	2.13998e-05	40	3.68587e-05	45	0.00012608	50	1.35601e-05	55	3.10556e-05	60	3.64e-05	65		70		75		80		85		90		95	0.000114799	100	3.33963e-05	105	0.000127888	110	3.74484e-05	115	3.42402e-05	120	1.57466e-05	125
	5		10		15		20		25		30		35	0.000194353	40	2.87122e-05	45	8.1742e-05	50	2.02702e-05	55	5.33681e-05	60	3.36536e-05	65		70		75		80		85		90		95	3.611e-05	100	1.68317e-05	105	8.05106e-05	110	4.46944e-05	115	3.25885e-05	120	2.42752e-05	125
	5		10		15		20		25		30		35	2.18056e-05	40	2.99412e-05	45	3.73077e-05	50	1.33078e-05	55	3.2154e-05	60	3.31382e-05	65		70		75		80		85		90		95	2.09046e-05	100	2.01521e-05	105	0.000100907	110	3.93978e-05	115	3.45324e-05	120	1.47585e-05	125
	5		10		15		20		25		30		35	2.09684e-05	40	3.26207e-05	45	3.30768e-05	50	1.44138e-05	55	3.59933e-05	60	3.59469e-05	65		70		75		80		85		90		95	9.07463e-05	100	2.20252e-05	105	9.0092e-05	110	3.89207e-05	115	3.43312e-05	120	1.83753e-05	125
	5		10		15		20		25		30		35	2.34296e-05	40	2.76472e-05	45	3.85124e-05	50	1.70333e-05	55	3.13892e-05	60	3.96433e-05	65		70		75		80		85		90		95	0.000115631	100	1.67716e-05	105	7.55873e-05	110	3.73066e-05	115	3.47996e-05	120	1.93301e-05	125
	5		10		15		20		25		30		35	0.000192272	40	2.48119e-05	45	2.92492e-05	50	4.80145e-05	55	2.79421e-05	60	3.65571e-05	65		70		75		80		85		90		95	8.1232e-05	100	2.08307e-05	105	0.000196418	110	2.65966e-05	115	3.52783e-05	120	1.63614e-05	125
	5		10		15		20		25		30		35	2.56814e-05	40	3.35712e-05	45	5.79477e-05	50	1.57066e-05	55	3.0408e-05	60	3.02472e-05	65		70		75		80		85		90		95	4.44934e-05	100	7.11763e-05	105	2.39075e-05	110	3.42139e-05	115	4.52444e-05	120	1.38945e-05	125
	5		10		15		20		25		30		35	2.12047e-05	40	5.21448e-05	45	4.75724e-05	50	1.63994e-05	55	4.75949e-05	60	2.91101e-05	65		70		75		80		85		90		95	5.16075e-05	100	4.523e-05	105	2.03003e-05	110	6.21446e-05	115	2.95872e-05	120	1.60599e-05	125
	5		10		15		20		25		30		35	9.46775e-05	40	3.55165e-05	45	3.71805e-05	50	1.40498e-05	55	3.63441e-05	60	3.0931e-05	65		70		75		80		85		90		95	4.16507e-05	100	3.91171e-05	105	2.71869e-05	110	2.48033e-05	115	2.98369e-05	120	1.60216e-05	125
	5		10		15		20		25		30		35	2.00517e-05	40	2.58323e-05	45	4.20455e-05	50	2.7447e-05	55	3.54778e-05	60	3.26706e-05	65		70		75		80		85		90		95	2.65546e-05	100	2.2477e-05	105	2.31985e-05	110	2.43182e-05	115	3.50068e-05	120	1.9393e-05	125
	5		10		15		20		25		30		35	2.57468e-05	40	2.20182e-05	45	3.71039e-05	50	1.64304e-05	55	2.88732e-05	60	2.61817e-05	65		70		75		80		85		90		95	2.16192e-05	100	3.32972e-05	105	2.47428e-05	110	2.58442e-05	115	3.30403e-05	120	1.78689e-05	125
	5		10		15		20		25		30		35	2.17655e-05	40	0.000116115	45	3.34588e-05	50	1.48543e-05	55	3.32618e-05	60	3.0325e-05	65		70		75		80		85		90		95	2.31941e-05	100	2.11736e-05	105	2.6793e-05	110	1.56488e-05	115	6.72262e-05	120	1.71823e-05	125
	5		10		15		20		25		30		35	0.000271983	40	3.95384e-05	45	5.24131e-05	50	1.30363e-05	55	0.0001759	60	2.62799e-05	65		70		75		80		85		90		95	2.65411e-05	100	2.61778e-05	105	2.24519e-05	110	3.08979e-05	115	3.30299e-05	120	2.31842e-05	125
	5		10		15		20		25		30		35	3.95806e-05	40	5.2657e-05	45	2.80569e-05	50	1.61388e-05	55	5.07093e-05	60	5.8607e-05	65		70		75		80		85		90		95	2.13634e-05	100	2.77771e-05	105	0.000111078	110	2.23117e-05	115	2.98325e-05	120	1.43729e-05	125
	5		10		15		20		25		30		35	2.93546e-05	40	2.45383e-05	45	3.32043e-05	50	1.49375e-05	55	0.000339654	60	3.2469e-05	65		70		75		80		85		90		95	2.15848e-05	100	2.55112e-05	105	5.40625e-05	110	1.86807e-05	115	3.09874e-05	120	3.67522e-05	125
	5		10		15		20		25		30		35	2.09018e-05	40	4.09579e-05	45	3.50048e-05	50	1.95908e-05	55	4.28535e-05	60	3.18658e-05	65		70		75		80		85		90		95	6.39004e-05	100	3.32719e-05	105	4.32378e-05	110	5.45946e-05	115	3.61948e-05	120	2.67693e-05	125
	5		10		15		20		25		30		35	4.42476e-05	40	1.93456e-05	45	3.07275e-05	50	1.49805e-05	55	2.92534e-05	60	2.56034e-05	65		70		75		80		85		90		95	2.54468e-05	100	3.68566e-05	105	2.54514e-05	110	1.28052e-05	115	3.07472e-05	120	4.47086e-05	125
	5		10		15		20		25		30		35	7.89374e-05	40	3.56019e-05	45	2.80202e-05	50	1.84908e-05	55	3.33294e-05	60	5.07268e-05	65		70		75		80		85		90		95	2.29781e-05	100	2.69653e-05	105	2.62518e-05	110	2.0596e-05	115	9.59072e-05	120	4.56684e-05	125
	5		10		15		20		25		30		35	9.64294e-05	40	1.97791e-05	45	4.74891e-05	50	1.35627e-05	55	6.33162e-05	60	5.51522e-05	65		70		75		80		85		90		95	4.66621e-05	100	1.65279e-05	105	0.000157137	110	2.77236e-05	115	6.4489e-05	120	1.58942e-05	125
	5		10		15		20		25		30		35	2.45403e-05	40	5.98773e-05	45	3.11122e-05	50	1.43342e-05	55	6.04395e-05	60	2.6458e-05	65		70		75		80		85		90		95	2.45764e-05	100	1.90611e-05	105	9.03379e-05	110	1.65562e-05	115	3.63168e-05	120	2.31165e-05	125
	5		10		15		20		25		30		35	9.27915e-05	40	2.94193e-05	45	3.31126e-05	50	1.35882e-05	55	2.85439e-05	60	2.87376e-05	65		70		75		80		85		90		95	2.96381e-05	100	2.21343e-05	105	8.83173e-05	110	1.61478e-05	115	6.50053e-05	120	2.71572e-05	125
	5		10		15		20		25		30		35	2.2455e-05	40	2.47618e-05	45	3.5114e-05	50	1.42743e-05	55	3.78395e-05	60	5.71081e-05	65		70		75		80		85		90		95	2.32931e-05	100	2.31205e-05	105	2.31916e-05	110	8.15615e-05	115	3.58408e-05	120	1.68343e-05	125
	5		10		15		20		25		30		35	0.000720059	40	1.82225e-05	45	3.49402e-05	50	1.55708e-05	55	3.90306e-05	60	3.23898e-05	65		70		75		80		85		90		95	3.67838e-05	100	2.20304e-05	105	4.27052e-05	110	1.88815e-05	115	5.52181e-05	120	1.72629e-05	125
	5		10		15		20		25		30		35	4.96757e-05	40	2.42928e-05	45	2.87657e-05	50	2.30004e-05	55	2.89135e-05	60	3.20629e-05	65		70		75		80		85		90		95	2.71725e-05	100	1.7046e-05	105	3.38426e-05	110	3.16651e-05	115	3.67702e-05	120	1.57425e-05	125
	5		10		15		20		25		30		35	2.23806e-05	40	1.81532e-05	45	2.77567e-05	50	2.34486e-05	55	3.53931e-05	60	0.00011466	65		70		75		80		85		90		95	4.60402e-05	100	1.79604e-05	105	0.000149781	110	3.0408e-05	115	3.91186e-05	120	0.000110202	125
	5		10		15		20		25		30		35	2.58411e-05	40	3.61967e-05	45	3.01689e-05	50	2.8909e-05	55	3.18511e-05	60	3.0979e-05	65		70		75		80		85		90		95	3.84672e-05	100	2.123e-05	105	0.000159085	110	1.7482e-05	115	7.58515e-05	120	1.37211e-05	125
	5		10		15		20		25		30		35	4.37418e-05	40	2.4197e-05	45	4.72714e-05	50	1.30802e-05	55	2.73475e-05	60	4.5954e-05	65		70		75		80		85		90		95	3.79207e-05	100	5.42314e-05	105	0.00011035	110	4.53714e-05	115	3.23522e-05	120	2.72876e-05	125
	5		10		15		20		25		30		35	2.0314e-05	40	2.76971e-05	45	2.66787e-05	50	2.63578e-05	55	2.73206e-05	60	2.78043e-05	65		70		75		80		85		90		95	0.00059471	100	1.70822e-05	105	2.357e-05	110	3.91198e-05	115	8.64362e-05	120	1.45183e-05	125
	5		10		15		20		25		30		35	3.19758e-05	40	1.8274e-05	45	3.18007e-05	50	1.81562e-05	55	4.62007e-05	60	6.12423e-05	65		70		75		80		85		90		95	2.28823e-05	100	1.98506e-05	105	3.78196e-05	110	7.71627e-05	115	0.000119846	120	1.40261e-05	125
	5		10		15		20		25		30		35	2.17854e-05	40	2.87779e-05	45	2.74591e-05	50	1.62178e-05	55	3.44479e-05	60	2.53779e-05	65		70		75		80		85		90		95	2.09507e-05	100	4.78583e-05	105	2.30589e-05	110	1.40538e-05	115	4.3792e-05	120	1.5979e-05	125
	5		10		15		20		25		30		35	2.62465e-05	40	2.35113e-05	45	3.10133e-05	50	1.52184e-05	55	3.33419e-05	60	3.25234e-05	65		70		75		80		85		90		95	2.59317e-05	100	1.91245e-05	105	2.92922e-05	110	1.48322e-05	115	3.50894e-05	120	1.43493e-05	125
	5		10		15		20		25		30		35	0.000262732	40	2.18871e-05	45	2.70421e-05	50	1.30199e-05	55	3.18498e-05	60	3.22272e-05	65		70		75		80		85		90		95	2.2321e-05	100	3.31015e-05	105	4.5655e-05	110	1.41487e-05	115	3.10157e-05	120	2.29818e-05	125
	5		10		15		20		25		30		35	6.58617e-05	40	9.2438e-05	45	3.94499e-05	50	2.08672e-05	55	4.7159e-05	60	2.9292e-05	65		70		75		80		85		90		95	5.37672e-05	100	1.65386e-05	105	2.83124e-05	110	2.24318e-05	115	5.00579e-05	120	2.07431e-05	125
	5		10		15		20		25		30		35	2.98443e-05	40	2.71172e-05	45	2.92028e-05	50	1.77858e-05	55	4.94464e-05	60	2.74802e-05	65		70		75		80		85		90		95	3.45343e-05	100	1.93322e-05	105	2.02483e-05	110	2.94455e-05	115	3.83165e-05	120	2.73205e-05	125
	5		10		15		20		25		30		35	3.09258e-05	40	2.09238e-05	45	3.30528e-05	50	1.34849e-05	55	8.78992e-05	60	2.79667e-05	65		70		75		80		85		90		95	3.66554e-05	100	3.30663e-05	105	2.47901e-05	110	2.83635e-05	115	4.10496e-05	120	1.63422e-05	125
	5		10		15		20		25		30		35	2.77574e-05	40	3.17833e-05	45	2.82598e-05	50	1.88084e-05	55	5.28614e-05	60	3.69678e-05	65		70		75		80		85		90		95	2.96652e-05	100	2.73955e-05	105	1.96439e-05	110	7.08505e-05	115	3.42558e-05	120	1.4834e-05	125
	5		10		15		20		25		30		35	3.92053e-05	40	2.00816e-05	45	3.86488e-05	50	1.42211e-05	55	3.93747e-05	60	2.8798e-05	65		70		75		80		85		90		95	4.84711e-05	100	4.90791e-05	105	2.26561e-05	110	1.33444e-05	115	3.79955e-05	120	2.6326e-05	125
	5		10		15		20		25		30		35	2.10386e-05	40	2.30903e-05	45	4.19416e-05	50	1.76236e-05	55	2.69542e-05	60	3.46382e-05	65		70		75		80		85		90		95	2.21161e-05	100	1.99648e-05	105	2.22525e-05	110	3.76632e-05	115	3.21819e-05	120	1.49485e-05	125
	5		10		15		20		25		30		35	2.07061e-05	40	3.26512e-05	45	2.80199e-05	50	1.41339e-05	55	2.66014e-05	60	3.31985e-05	65		70		75		80		85		90		95	2.41666e-05	100	2.4527e-05	105	2.41264e-05	110	6.7058e-05	115	3.16517e-05	120	1.37553e-05	125
	5		10		15		20		25		30		35	2.33769e-05	40	2.2023e-05	45	2.95108e-05	50	1.30361e-05	55	3.60067e-05	60	3.94344e-05	65		70		75		80		85		90		95	0.000163577	100	1.89757e-05	105	3.53116e-05	110	3.07937e-05	115	4.30064e-05	120	1.51313e-05	125
	5		10		15		20		25		30		35	2.87269e-05	40	2.80952e-05	45	3.20796e-05	50	1.58157e-05	55	3.11063e-05	60	5.76901e-05	65		70		75		80		85		90		95	2.22069e-05	100	2.26171e-05	105	1.95484e-05	110	3.4681e-05	115	4.33262e-05	120	1.53961e-05	125
	5		10		15		20		25		30		35	3.56359e-05	40	2.99787e-05	45	3.04577e-05	50	1.30517e-05	55	2.74065e-05	60	6.38903e-05	65		70		75		80		85		90		95	2.13575e-05	100	3.32107e-05	105	9.09256e-05	110	3.07865e-05	115	3.75748e-05	120	1.51535e-05	125
	5		10		15		20		25		30		35	5.43642e-05	40	2.34272e-05	45	3.00332e-05	50	1.39508e-05	55	3.07946e-05	60	5.29858e-05	65		70		75		80		85		90		95	5.4546e-05	100	2.41586e-05	105	1.95603e-05	110	2.87332e-05	115	5.67701e-05	120	1.43567e-05	125
	5		10		15		20		25		30		35	4.747e-05	40	3.70992e-05	45	3.72447e-05	50	1.60624e-05	55	2.81005e-05	60	5.55039e-05	65		70		75		80		85		90		95	4.6758e-05	100	3.01245e-05	105	2.4627e-05	110	3.21585e-05	115	3.02917e-05	120	2.33741e-05	125
	5		10		15		20		25		30		35	2.06269e-05	40	3.53228e-05	45	2.94676e-05	50	1.46769e-05	55	0.0001071	60	3.29232e-05	65		70		75		80		85		90		95	0.000107976	100	1.7351e-05	105	0.000156883	110	1.52289e-05	115	2.95445e-05	120	1.65298e-05	125
	5		10		15		20		25		30		35	2.65756e-05	40	2.41877e-05	45	3.50313e-05	50	1.65792e-05	55	3.37942e-05	60	3.09758e-05	65		70		75		80		85		90		95	0.000112483	100	1.87367e-05	105	0.000107568	110	6.14306e-05	115	3.07017e-05	120	1.587e-05	125
	5		10		15		20		25		30		35	2.31419e-05	40	4.0992e-05	45	4.61911e-05	50	2.27569e-05	55	3.18421e-05	60	4.12619e-05	65		70		75		80		85		90		95	0.000132624	100	2.75869e-05	105	2.27471e-05	110	2.78587e-05	115	3.93576e-05	120	3.17749e-05	125
	5		10		15		20		25		30		35	4.13736e-05	40	4.50317e-05	45	3.12727e-05	50	2.47422e-05	55	4.36994e-05	60	3.26741e-05	65		70		75		80		85		90		95	2.97341e-05	100	3.45471e-05	105	3.21276e-05	110	5.27516e-05	115	3.67777e-05	120	1.75495e-05	125
	5		10		15		20		25		30		35	2.50583e-05	40	7.99653e-05	45	2.69962e-05	50	1.46311e-05	55	2.86909e-05	60	2.5311e-05	65		70		75		80		85		90		95	3.20344e-05	100	4.81716e-05	105	2.03822e-05	110	1.55949e-05	115	2.97385e-05	120	1.62197e-05	125
	5		10		15		20		25		30		35	2.05391e-05	40	2.57553e-05	45	3.94579e-05	50	1.31391e-05	55	4.66378e-05	60	2.96585e-05	65		70		75		80		85		90		95	3.04283e-05	100	1.85552e-05	105	0.000137312	110	3.34671e-05	115	2.95491e-05	120	2.43501e-05	125
	5		10		15		20		25		30		35	4.33787e-05	40	3.47634e-05	45	4.07196e-05	50	1.71726e-05	55	4.91306e-05	60	3.73977e-05	65		70		75		80		85		90		95	2.2624e-05	100	1.81767e-05	105	0.000147104	110	2.69496e-05	115	5.52989e-05	120	1.70352e-05	125
	5		10		15		20		25		30		35	2.20962e-05	40	2.0151e-05	45	3.57913e-05	50	1.78055e-05	55	3.4132e-05	60	5.82885e-05	65		70		75		80		85		90		95	4.62778e-05	100	2.56052e-05	105	2.34294e-05	110	1.44501e-05	115	4.69057e-05	120	1.36198e-05	125
	5		10		15		20		25		30		35	2.5338e-05	40	3.76261e-05	45	2.68539e-05	50	1.5831e-05	55	3.05851e-05	60	4.98471e-05	65		70		75		80		85		90		95	5.1385e-05	100	2.02116e-05	105	2.00739e-05	110	4.31405e-05	115	0.000102514	120	1.65361e-05	125
	5		10		15		20		25		30		35	2.09323e-05	40	2.26507e-05	45	3.17918e-05	50	1.35064e-05	55	4.16191e-05	60	4.46761e-05	65		70		75		80		85		90		95	4.23493e-05	100	2.28244e-05	105	8.44142e-05	110	3.40803e-05	115	3.2204e-05	120	1.46038e-05	125
	5		10		15		20		25		30		35	3.0974e-05	40	2.3987e-05	45	2.88821e-05	50	2.71193e-05	55	2.97663e-05	60	2.72793e-05	65		70		75		80		85		90		95	2.1737e-05	100	3.35488e-05	105	8.4373e-05	110	5.04061e-05	115	3.71318e-05	120	1.97499e-05	125
	5		10		15		20		25		30		35	2.06195e-05	40	3.46994e-05	45	2.7724e-05	50	1.77937e-05	55	2.87641e-05	60	2.85358e-05	65		70		75		80		85		90		95	2.09286e-05	100	2.82241e-05	105	2.06758e-05	110	6.90892e-05	115	4.41957e-05	120	1.72197e-05	125
	5		10		15		20		25		30		35	0.000433901	40	1.94507e-05	45	3.1077e-05	50	1.5536e-05	55	2.83455e-05	60	3.93715e-05	65		70		75		80		85		90		95	0.00039667	100	2.04198e-05	105	0.000440654	110	2.14233e-05	115	3.04037e-05	120	1.66998e-05	125
	5		10		15		20		25		30		35	2.51051e-05	40	5.34623e-05	45	4.50675e-05	50	1.47971e-05	55	3.32875e-05	60	3.07034e-05	65		70		75		80		85		90		95	2.17618e-05	100	2.04572e-05	105	2.42914e-05	110	4.10586e-05	115	3.2689e-05	120	1.42335e-05	125
	5		10		15		20		25		30		35	9.59805e-05	40	2.67307e-05	45	3.80068e-05	50	1.76853e-05	55	2.68728e-05	60	3.08995e-05	65		70		75		80		85		90		95	2.05806e-05	100	3.532e-05	105	1.99133e-05	110	3.69211e-05	115	3.74586e-05	120	1.36978e-05	125
	5		10		15		20		25		30		35	2.925e-05	40	4.06874e-05	45	3.39348e-05	50	1.60757e-05	55	2.67453e-05	60	4.26677e-05	65		70		75		80		85		90		95	2.41215e-05	100	2.34377e-05	105	0.000112542	110	3.48576e-05	115	3.19711e-05	120	0.000209913	125
	5		10		15		20		25		30		35	2.52935e-05	40	3.86597e-05	45	3.77439e-05	50	2.02474e-05	55	3.41751e-05	60	6.08606e-05	65		70		75		80		85		90		95	2.68728e-05	100	3.46997e-05	105	0.00034318	110	1.28875e-05	115	3.186e-05	120	2.15162e-05	125
	5		10		15		20		25		30		35	2.00818e-05	40	3.14407e-05	45	3.50522e-05	50	1.32216e-05	55	2.78311e-05	60	3.51496e-05	65		70		75		80		85		90		95	2.96854e-05	100	2.09376e-05	105	2.70531e-05	110	1.27697e-05	115	3.39204e-05	120	1.71458e-05	125
	5		10		15		20		25		30		35	2.57247e-05	40	3.75946e-05	45	2.96539e-05	50	3.88907e-05	55	3.13849e-05	60	4.75722e-05	65		70		75		80		85		90		95	2.41176e-05	100	2.26519e-05	105	2.36173e-05	110	4.13997e-05	115	2.99224e-05	120	1.37889e-05	125
	5		10		15		20		25		30		35	2.18101e-05	40	1.80383e-05	45	3.20689e-05	50	2.75386e-05	55	3.37035e-05	60	5.11214e-05	65		70		75		80		85		90		95	2.62517e-05	100	1.80574e-05	105	2.01668e-05	110	1.68519e-05	115	3.77793e-05	120	1.75717e-05	125
	5		10		15		20		25		30		35	2.26264e-05	40	2.43991e-05	45	3.69667e-05	50	1.34481e-05	55	3.0114e-05	60	4.30087e-05	65		70		75		80		85		90		95	2.55116e-05	100	2.75398e-05	105	0.00016496	110	2.18322e-05	115	5.85187e-05	120	1.65593e-05	125
	5		10		15		20		25		30		35	2.67596e-05	40	8.64318e-05	45	2.99146e-05	50	1.69236e-05	55	3.47644e-05	60	2.95747e-05	65		70		75		80		85		90		95	2.12082e-05	100	3.40526e-05	105	3.01011e-05	110	3.6156e-05	115	3.50786e-05	120	1.46765e-05	125
	5		10		15		20		25		30		35	2.39501e-05	40	4.6098e-05	45	3.27338e-05	50	1.37951e-05	55	3.24735e-05	60	3.04415e-05	65		70		75		80		85		90		95	2.07204e-05	100	1.77483e-05	105	2.41831e-05	110	1.79282e-05	115	3.36911e-05	120	1.51088e-05	125
	5		10		15		20		25		30		35	7.2295e-05	40	2.86409e-05	45	2.6935e-05	50	1.47301e-05	55	0.00101608	60	2.69667e-05	65		70		75		80		85		90		95	2.49545e-05	100	3.39316e-05	105	2.04415e-05	110	1.69816e-05	115	3.16785e-05	120	1.7002e-05	125
	5		10		15		20		25		30		35	2.0141e-05	40	3.95234e-05	45	3.15504e-05	50	1.35187e-05	55	2.93928e-05	60	3.01862e-05	65		70		75		80		85		90		95	2.25911e-05	100	2.76052e-05	105	2.63016e-05	110	3.88797e-05	115	4.21671e-05	120	1.53274e-05	125
	5		10		15		20		25		30		35	2.60836e-05	40	7.8183e-05	45	2.91937e-05	50	1.48493e-05	55	2.8013e-05	60	3.00646e-05	65		70		75		80		85		90		95	2.51507e-05	100	1.72511e-05	105	2.4015e-05	110	2.0652e-05	115	4.91951e-05	120	1.44268e-05	125
	5		10		15		20		25		30		35	5.77127e-05	40	2.42056e-05	45	2.70549e-05	50	1.65284e-05	55	3.17045e-05	60	6.10257e-05	65		70		75		80		85		90		95	6.2176e-05	100	2.55491e-05	105	2.81866e-05	110	4.33393e-05	115	3.12417e-05	120	1.59726e-05	125
	5		10		15		20		25		30		35	3.36794e-05	40	1.93437e-05	45	4.00298e-05	50	2.0096e-05	55	3.61801e-05	60	8.56749e-05	65		70		75		80		85		90		95	2.20106e-05	100	3.59097e-05	105	9.92834e-05	110	2.49283e-05	115	4.68696e-05	120	1.5576e-05	125
	5		10		15		20		25		30		35	2.40254e-05	40	2.12269e-05	45	3.21756e-05	50	1.39351e-05	55	3.29245e-05	60	2.86162e-05	65		70		75		80		85		90		95	3.06697e-05	100	1.92335e-05	105	8.58885e-05	110	7.62193e-05	115	4.34415e-05	120	0.000132522	125
	5		10		15		20		25		30		35	2.41749e-05	40	2.2533e-05	45	4.70978e-05	50	3.11998e-05	55	4.39311e-05	60	2.65946e-05	65		70		75		80		85		90		95	5.44476e-05	100	2.86763e-05	105	2.61225e-05	110	1.2757e-05	115	3.90792e-05	120	1.55344e-05	125
	5		10		15		20		25		30		35	2.15754e-05	40	3.35495e-05	45	3.03809e-05	50	1.31806e-05	55	4.06719e-05	60	2.54172e-05	65		70		75		80		85		90		95	3.11694e-05	100	3.08394e-05	105	0.000183521	110	1.4308e-05	115	3.08966e-05	120	1.42354e-05	125
	5		10		15		20		25		30		35	2.01274e-05	40	2.90789e-05	45	4.0099e-05	50	6.92044e-05	55	3.16443e-05	60	3.47245e-05	65		70		75		80		85		90		95	0.00211715	100	2.87373e-05	105	0.000112905	110	3.96771e-05	115	3.04706e-05	120	1.5784e-05	125
	5		10		15		20		25		30		35	4.92885e-05	40	1.89452e-05	45	3.19648e-05	50	1.57836e-05	55	5.01105e-05	60	2.61203e-05	65		70		75		80		85		90		95	9.23478e-05	100	2.03889e-05	105	1.97595e-05	110	3.87554e-05	115	4.2681e-05	120	0.000186618	125
	5		10		15		20		25		30		35	4.11463e-05	40	4.0012e-05	45	3.94666e-05	50	1.3153e-05	55	7.59982e-05	60	4.17528e-05	65		70		75		80		85		90		95	4.04634e-05	100	6.10068e-05	105	5.51307e-05	110	1.22908e-05	115	5.24606e-05	120	2.00209e-05	125
	5		10		15		20		25		30		35	3.78399e-05	40	3.60568e-05	45	0.000109172	50	1.47622e-05	55	2.6643e-05	60	4.68731e-05	65		70		75		80		85		90		95	4.16232e-05	100	1.74207e-05	105	5.75375e-05	110	7.01166e-05	115	3.20346e-05	120	1.44586e-05	125
	5		10		15		20		25		30		35	0.000107577	40	2.39618e-05	45	6.83282e-05	50	1.35493e-05	55	3.74053e-05	60	2.6361e-05	65		70		75		80		85		90		95	2.41879e-05	100	3.59119e-05	105	1.98528e-05	110	1.4596e-05	115	2.98923e-05	120	1.68025e-05	125
	5		10		15		20		25		30		35	3.17437e-05	40	1.89386e-05	45	2.71445e-05	50	1.58257e-05	55	3.16151e-05	60	4.78475e-05	65		70		75		80		85		90		95	4.80321e-05	100	4.78568e-05	105	0.000412312	110	2.04117e-05	115	4.52156e-05	120	2.75687e-05	125
	5		10		15		20		25		30		35	6.28375e-05	40	0.000411657	45	3.63931e-05	50	1.53404e-05	55	3.45877e-05	60	2.76003e-05	65		70		75		80		85		90		95	0.00110469	100	1.67633e-05	105	6.16871e-05	110	1.27053e-05	115	3.85853e-05	120	3.5122e-05	125
	5		10		15		20		25		30		35	2.72503e-05	40	3.00681e-05	45	4.33223e-05	50	1.3905e-05	55	6.73505e-05	60	2.77067e-05	65		70		75		80		85		90		95	2.12994e-05	100	3.75365e-05	105	9.00744e-05	110	1.50523e-05	115	0.000119895	120	1.42351e-05	125
	5		10		15		20		25		30		35	7.89688e-05	40	0.000230252	45	5.69762e-05	50	1.57247e-05	55	2.99726e-05	60	4.10167e-05	65		70		75		80		85		90		95	2.14851e-05	100	1.93192e-05	105	0.000122931	110	1.4452e-05	115	3.42249e-05	120	2.30416e-05	125
	5		10		15		20		25		30		35	0.000147599	40	4.74565e-05	45	7.0079e-05	50	1.97335e-05	55	3.86127e-05	60	4.57088e-05	65		70		75		80		85		90		95	2.10548e-05	100	1.73798e-05	105	2.18751e-05	110	2.04197e-05	115	3.82641e-05	120	1.82238e-05	125
	5		10		15		20		25		30		35	2.82063e-05	40	2.76287e-05	45	3.00916e-05	50	1.37282e-05	55	2.77586e-05	60	2.64027e-05	65		70		75		80		85		90		95	2.73754e-05	100	2.27863e-05	105	2.21348e-05	110	2.42434e-05	115	3.01489e-05	120	1.53848e-05	125
	5		10		15		20		25		30		35	0.00017319	40	4.95378e-05	45	4.06836e-05	50	1.3845e-05	55	3.73645e-05	60	2.76998e-05	65		70		75		80		85		90		95	3.15126e-05	100	3.60843e-05	105	0.000389849	110	2.635e-05	115	7.06647e-05	120	1.38539e-05	125
	5		10		15		20		25		30		35	2.81709e-05	40	5.79519e-05	45	2.94792e-05	50	1.65871e-05	55	4.03303e-05	60	2.66659e-05	65		70		75		80		85		90		95	2.86032e-05	100	1.68603e-05	105	2.18572e-05	110	2.99001e-05	115	4.31533e-05	120	1.44621e-05	125
	5		10		15		20		25		30		35	0.000426674	40	2.21851e-05	45	2.7013e-05	50	1.34593e-05	55	3.06054e-05	60	3.11591e-05	65		70		75		80		85		90		95	6.33136e-05	100	3.66839e-05	105	3.14914e-05	110	1.26189e-05	115	8.88424e-05	120	2.43103e-05	125
	5		10		15		20		25		30		35	2.02269e-05	40	2.28699e-05	45	3.32664e-05	50	1.57579e-05	55	4.04491e-05	60	2.57874e-05	65		70		75		80		85		90		95	8.75108e-05	100	2.44205e-05	105	2.72126e-05	110	2.55365e-05	115	3.06021e-05	120	8.15661e-05	125
	5		10		15		20		25		30		35	5.58033e-05	40	2.95985e-05	45	3.07035e-05	50	6.08988e-05	55	3.76237e-05	60	3.52368e-05	65		70		75		80		85		90		95	0.000713752	100	2.0997e-05	105	2.4039e-05	110	0.000193938	115	4.53788e-05	120	1.47149e-05	125
	5		10		15		20		25		30		35	4.92771e-05	40	2.50774e-05	45	0.00013509	50	1.36766e-05	55	3.88771e-05	60	3.53538e-05	65		70		75		80		85		90		95	2.24187e-05	100	1.93155e-05	105	7.94483e-05	110	2.01374e-05	115	3.60537e-05	120	2.16896e-05	125
	5		10		15		20		25		30		35	4.46629e-05	40	2.84574e-05	45	0.00014314	50	1.58294e-05	55	2.84387e-05	60	4.26093e-05	65		70		75		80		85		90		95	0.000147326	100	2.99394e-05	105	7.02174e-05	110	6.58042e-05	115	3.33418e-05	120	2.17087e-05	125
	5		10		15		20		25		30		35	3.53742e-05	40	2.6609e-05	45	0.000132172	50	1.30958e-05	55	2.70052e-05	60	6.03092e-05	65		70		75		80		85		90		95	2.97399e-05	100	1.69863e-05	105	2.75929e-05	110	3.27956e-05	115	3.24081e-05	120	2.36165e-05	125
	5		10		15		20		25		30		35	3.19392e-05	40	0.000110069	45	3.49888e-05	50	1.36996e-05	55	3.37897e-05	60	3.69798e-05	65		70		75		80		85		90		95	2.24072e-05	100	2.85893e-05	105	9.43905e-05	110	4.82298e-05	115	3.03759e-05	120	1.526e-05	125
	5		10		15		20		25		30		35	2.32836e-05	40	3.06593e-05	45	3.87566e-05	50	1.42582e-05	55	5.74674e-05	60	3.2417e-05	65		70		75		80		85		90		95	2.10557e-05	100	2.92746e-05	105	0.000103401	110	2.84977e-05	115	4.39457e-05	120	1.63956e-05	125
	5		10		15		20		25		30		35	2.37605e-05	40	3.07059e-05	45	3.13779e-05	50	4.60101e-05	55	2.95113e-05	60	3.27688e-05	65		70		75		80		85		90		95	2.89634e-05	100	2.23283e-05	105	2.08197e-05	110	1.58088e-05	115	3.81933e-05	120	2.08038e-05	125
	5		10		15		20		25		30		35	2.96203e-05	40	6.03798e-05	45	3.57499e-05	50	1.78298e-05	55	2.78967e-05	60	2.51266e-05	65		70		75		80		85		90		95	7.7121e-05	100	1.71833e-05	105	6.42808e-05	110	4.27309e-05	115	3.29113e-05	120	1.41735e-05	125
	5		10		15		20		25		30		35	2.75358e-05	40	8.91368e-05	45	2.69326e-05	50	1.40454e-05	55	4.10117e-05	60	4.0493e-05	65		70		75		80		85		90		95	4.2568e-05	100	1.8481e-05	105	0.000107733	110	1.2769e-05	115	2.97619e-05	120	1.42552e-05	125
	5		10		15		20		25		30		35	0.000234369	40	5.01944e-05	45	3.42783e-05	50	1.56721e-05	55	3.14719e-05	60	3.63678e-05	65		70		75		80		85		90		95	3.89989e-05	100	1.98041e-05	105	2.79757e-05	110	1.49049e-05	115	3.86849e-05	120	1.91283e-05	125
	5		10		15		20		25		30		35	5.32397e-05	40	4.54947e-05	45	3.84257e-05	50	1.36955e-05	55	2.66637e-05	60	3.617e-05	65		70		75		80		85		90		95	2.49856e-05	100	2.5498e-05	105	2.73694e-05	110	1.27184e-05	115	3.99572e-05	120	1.43975e-05	125
	5		10		15		20		25		30		35	2.51144e-05	40	2.59782e-05	45	2.70036e-05	50	1.32839e-05	55	3.13532e-05	60	3.375e-05	65		70		75		80		85		90		95	9.72252e-05	100	2.22406e-05	105	2.96354e-05	110	5.32993e-05	115	3.31155e-05	120	1.38123e-05	125
	5		10		15		20		25		30		35	3.88784e-05	40	2.58055e-05	45	2.8591e-05	50	1.87913e-05	55	4.37169e-05	60	3.81493e-05	65		70		75		80		85		90		95	2.43343e-05	100	2.43928e-05	105	2.78205e-05	110	2.68125e-05	115	3.29758e-05	120	1.37954e-05	125
	5		10		15		20		25		30		35	3.93561e-05	40	3.37478e-05	45	4.11538e-05	50	1.67697e-05	55	2.88244e-05	60	2.51275e-05	65		70		75		80		85		90		95	0.000144576	100	2.30145e-05	105	2.91886e-05	110	1.23872e-05	115	3.86634e-05	120	1.50213e-05	125
	5		10		15		20		25		30		35	2.74134e-05	40	2.64725e-05	45	3.48922e-05	50	1.31266e-05	55	3.04801e-05	60	5.6093e-05	65		70		75		80		85		90		95	2.18522e-05	100	2.97262e-05	105	0.000267686	110	1.47262e-05	115	3.28413e-05	120	1.40396e-05	125
	5		10		15		20		25		30		35	0.000159728	40	3.5288e-05	45	4.5073e-05	50	1.49876e-05	55	3.07913e-05	60	4.52526e-05	65		70		75		80		85		90		95	2.83949e-05	100	3.23527e-05	105	5.24451e-05	110	2.41342e-05	115	3.07255e-05	120	1.52162e-05	125
	5		10		15		20		25		30		35	7.25726e-05	40	2.04703e-05	45	2.89912e-05	50	1.3212e-05	55	3.06796e-05	60	3.36585e-05	65		70		75		80		85		90		95	2.22073e-05	100	1.71634e-05	105	6.97286e-05	110	1.99551e-05	115	3.93102e-05	120	1.37526e-05	125
	5		10		15		20		25		30		35	5.22599e-05	40	2.30324e-05	45	2.74088e-05	50	1.43383e-05	55	3.74203e-05	60	4.49223e-05	65		70		75		80		85		90		95	2.36268e-05	100	1.81678e-05	105	4.27635e-05	110	1.94683e-05	115	3.30095e-05	120	1.41021e-05	125
	5		10		15		20		25		30		35	2.00953e-05	40	2.21778e-05	45	4.18487e-05	50	1.76841e-05	55	4.89647e-05	60	3.13927e-05	65		70		75		80		85		90		95	2.44406e-05	100	3.90694e-05	105	2.6898e-05	110	2.27476e-05	115	3.11478e-05	120	0.000154596	125
	5		10		15		20		25		30		35	0.000142307	40	3.61787e-05	45	4.31738e-05	50	1.6791e-05	55	5.72627e-05	60	2.53457e-05	65		70		75		80		85		90		95	3.97924e-05	100	2.24156e-05	105	2.26965e-05	110	3.7592e-05	115	2.98021e-05	120	1.66786e-05	125
	5		10		15		20		25		30		35	3.1695e-05	40	5.12129e-05	45	3.06624e-05	50	1.90863e-05	55	3.47055e-05	60	3.1223e-05	65		70		75		80		85		90		95	3.36003e-05	100	1.71904e-05	105	2.15271e-05	110	1.23418e-05	115	3.36896e-05	120	1.48498e-05	125
	5		10		15		20		25		30		35	0.000113481	40	2.9992e-05	45	4.44751e-05	50	1.91193e-05	55	2.88077e-05	60	3.6597e-05	65		70		75		80		85		90		95	2.24266e-05	100	3.21044e-05	105	2.1353e-05	110	2.00453e-05	115	5.42167e-05	120	1.42309e-05	125
	5		10		15		20		25		30		35	2.35923e-05	40	2.44375e-05	45	4.10257e-05	50	1.83007e-05	55	7.25478e-05	60	2.654e-05	65		70		75		80		85		90		95	2.2722e-05	100	3.05991e-05	105	9.74917e-05	110	4.39011e-05	115	4.85406e-05	120	2.25779e-05	125
	5		10		15		20		25		30		35	5.70755e-05	40	2.94604e-05	45	4.29984e-05	50	1.45353e-05	55	6.79852e-05	60	5.51978e-05	65		70		75		80		85		90		95	8.30615e-05	100	2.25703e-05	105	8.62166e-05	110	2.89006e-05	115	2.95485e-05	120	1.82694e-05	125
	5		10		15		20		25		30		35	2.71252e-05	40	3.04904e-05	45	2.94615e-05	50	1.78961e-05	55	2.7145e-05	60	3.60089e-05	65		70		75		80		85		90		95	9.18023e-05	100	1.82919e-05	105	2.11509e-05	110	1.84671e-05	115	0.000179637	120	6.49245e-05	125
	5		10		15		20		25		30		35	0.000296455	40	5.22826e-05	45	0.000145033	50	1.38496e-05	55	0.000110036	60	4.87251e-05	65		70		75		80		85		90		95	4.10026e-05	100	1.85748e-05	105	2.07319e-05	110	1.65391e-05	115	4.04674e-05	120	3.83948e-05	125
	5		10		15		20		25		30		35	2.21325e-05	40	2.0564e-05	45	3.85859e-05	50	1.65641e-05	55	6.76842e-05	60	3.90261e-05	65		70		75		80		85		90		95	4.91946e-05	100	1.94756e-05	105	2.46074e-05	110	1.764e-05	115	3.04284e-05	120	1.37579e-05	125
	5		10		15		20		25		30		35	0.000152787	40	2.46908e-05	45	2.96355e-05	50	8.95216e-05	55	5.5622e-05	60	3.20531e-05	65		70		75		80		85		90		95	2.16054e-05	100	2.52813e-05	105	2.61472e-05	110	1.2149e-05	115	3.3385e-05	120	1.40812e-05	125
	5		10		15		20		25		30		35	0.000437443	40	3.06782e-05	45	2.74015e-05	50	2.8458e-05	55	2.66197e-05	60	3.02851e-05	65		70		75		80		85		90		95	3.53791e-05	100	1.78981e-05	105	2.2249e-05	110	5.9956e-05	115	3.89003e-05	120	1.37925e-05	125
	5		10		15		20		25		30		35	5.83327e-05	40	1.80179e-05	45	3.61258e-05	50	1.64915e-05	55	7.00185e-05	60	3.5137e-05	65		70		75		80		85		90		95	2.25432e-05	100	2.25551e-05	105	2.38746e-05	110	2.22285e-05	115	3.78894e-05	120	1.9277e-05	125
	5		10		15		20		25		30		35	4.72807e-05	40	0.000198111	45	3.04549e-05	50	1.83818e-05	55	2.82009e-05	60	2.66576e-05	65		70		75		80		85		90		95	2.92508e-05	100	3.01441e-05	105	2.57987e-05	110	3.16135e-05	115	3.85551e-05	120	1.72702e-05	125
	5		10		15		20		25		30		35	4.00032e-05	40	3.31531e-05	45	2.96459e-05	50	1.37167e-05	55	3.72481e-05	60	3.03034e-05	65		70		75		80		85		90		95	4.29071e-05	100	1.67018e-05	105	2.86925e-05	110	1.8484e-05	115	0.000136265	120	1.77395e-05	125
	5		10		15		20		25		30		35	7.32633e-05	40	5.3608e-05	45	3.97264e-05	50	1.6312e-05	55	3.1099e-05	60	2.92355e-05	65		70		75		80		85		90		95	2.8609e-05	100	1.87369e-05	105	0.000203642	110	1.93645e-05	115	3.32382e-05	120	1.40251e-05	125
	5		10		15		20		25		30		35	2.11433e-05	40	6.66901e-05	45	3.70354e-05	50	1.41536e-05	55	6.20627e-05	60	2.57149e-05	65		70		75		80		85		90		95	0.000150667	100	4.56184e-05	105	2.29089e-05	110	3.31815e-05	115	3.85772e-05	120	1.38553e-05	125
	5		10		15		20		25		30		35	2.81849e-05	40	4.06149e-05	45	2.8349e-05	50	1.71565e-05	55	8.48629e-05	60	3.85498e-05	65		70		75		80		85		90		95	0.000103231	100	3.69653e-05	105	2.59557e-05	110	1.79076e-05	115	3.0791e-05	120	1.439e-05	125
	5		10		15		20		25		30		35	3.19444e-05	40	2.25523e-05	45	3.42256e-05	50	1.42968e-05	55	3.87241e-05	60	3.91158e-05	65		70		75		80		85		90		95	5.92711e-05	100	2.1976e-05	105	6.08577e-05	110	2.73889e-05	115	5.84389e-05	120	1.56924e-05	125
	5		10		15		20		25		30		35	2.61547e-05	40	2.12338e-05	45	5.98902e-05	50	1.30047e-05	55	3.15148e-05	60	2.68093e-05	65		70		75		80		85		90		95	3.29334e-05	100	7.8938e-05	105	2.45647e-05	110	1.75732e-05	115	3.8805e-05	120	2.03257e-05	125
	5		10		15		20		25		30		35	2.38766e-05	40	2.58324e-05	45	2.77461e-05	50	1.30769e-05	55	2.84974e-05	60	2.82996e-05	65		70		75		80		85		90		95	3.05473e-05	100	3.32514e-05	105	2.54516e-05	110	1.62611e-05	115	3.82603e-05	120	1.94248e-05	125
	5		10		15		20		25		30		35	3.3212e-05	40	3.46506e-05	45	4.50874e-05	50	1.38657e-05	55	3.18528e-05	60	4.02483e-05	65		70		75		80		85		90		95	2.05357e-05	100	4.21323e-05	105	2.20344e-05	110	1.92793e-05	115	4.18461e-05	120	1.37266e-05	125
	5		10		15		20		25		30		35	2.25378e-05	40	2.92148e-05	45	3.47371e-05	50	1.32677e-05	55	3.80933e-05	60	4.72111e-05	65		70		75		80		85		90		95	2.56076e-05	100	1.71127e-05	105	2.08964e-05	110	1.23202e-05	115	3.28742e-05	120	6.18087e-05	125
	5		10		15		20		25		30		35	2.72495e-05	40	2.12372e-05	45	3.1707e-05	50	1.31543e-05	55	3.49576e-05	60	3.4975e-05	65		70		75		80		85		90		95	2.07063e-05	100	2.54717e-05	105	2.1433e-05	110	5.59419e-05	115	5.90735e-05	120	1.46944e-05	125
	5		10		15		20		25		30		35	2.0026e-05	40	2.17652e-05	45	3.06512e-05	50	1.61198e-05	55	3.01044e-05	60	4.25294e-05	65		70		75		80		85		90		95	2.72082e-05	100	1.84092e-05	105	0.000149891	110	7.87985e-05	115	3.066e-05	120	7.29732e-05	125
	5		10		15		20		25		30		35	0.000109414	40	4.64492e-05	45	2.71291e-05	50	1.71376e-05	55	3.53981e-05	60	3.39377e-05	65		70		75		80		85		90		95	2.33872e-05	100	2.19604e-05	105	2.06522e-05	110	3.57658e-05	115	3.63325e-05	120	1.48795e-05	125
	5		10		15		20		25		30		35	0.000107145	40	2.71867e-05	45	3.25694e-05	50	1.42769e-05	55	2.7872e-05	60	2.72957e-05	65		70		75		80		85		90		95	2.41671e-05	100	2.86433e-05	105	0.000160971	110	1.34471e-05	115	3.01539e-05	120	1.50307e-05	125
	5		10		15		20		25		30		35	4.22028e-05	40	1.84418e-05	45	4.88836e-05	50	1.49531e-05	55	3.92538e-05	60	4.03156e-05	65		70		75		80		85		90		95	0.000198279	100	1.74239e-05	105	2.60771e-05	110	3.2106e-05	115	3.25294e-05	120	1.75847e-05	125
	5		10		15		20		25		30		35	2.03478e-05	40	2.03368e-05	45	3.28497e-05	50	1.57581e-05	55	2.89689e-05	60	3.68165e-05	65		70		75		80		85		90		95	2.2173e-05	100	1.7834e-05	105	3.63457e-05	110	3.89239e-05	115	6.50349e-05	120	1.47067e-05	125
	5		10		15		20		25		30		35	3.376e-05	40	2.52951e-05	45	3.24177e-05	50	1.36574e-05	55	0.000160522	60	3.67698e-05	65		70		75		80		85		90		95	9.40887e-05	100	1.92244e-05	105	3.43636e-05	110	3.16538e-05	115	4.01814e-05	120	1.88581e-05	125
	5		10		15		20		25		30		35	3.23547e-05	40	2.6713e-05	45	6.12313e-05	50	1.53496e-05	55	3.08234e-05	60	3.88153e-05	65		70		75		80		85		90		95	0.000250529	100	1.94956e-05	105	3.4524e-05	110	2.70644e-05	115	3.75548e-05	120	1.39094e-05	125
	5		10		15		20		25		30		35	4.50371e-05	40	2.10923e-05	45	4.98845e-05	50	1.33408e-05	55	2.91224e-05	60	3.43609e-05	65		70		75		80		85		90		95	8.00516e-05	100	3.00728e-05	105	2.39777e-05	110	2.05049e-05	115	0.000470467	120	1.86399e-05	125
	5		10		15		20		25		30		35	6.31544e-05	40	3.07641e-05	45	3.16831e-05	50	3.80648e-05	55	4.21205e-05	60	3.18275e-05	65		70		75		80		85		90		95	2.7282e-05	100	2.44638e-05	105	2.03711e-05	110	3.23315e-05	115	3.93692e-05	120	2.21145e-05	125
	5		10		15		20		25		30		35	9.03406e-05	40	2.80778e-05	45	4.31548e-05	50	1.39482e-05	55	4.03586e-05	60	3.66067e-05	65		70		75		80		85		90		95	2.07021e-05	100	2.27046e-05	105	2.53337e-05	110	8.21899e-05	115	3.85547e-05	120	1.44203e-05	125
	5		10		15		20		25		30		35	2.57256e-05	40	2.28279e-05	45	4.1103e-05	50	2.32475e-05	55	3.92349e-05	60	3.12079e-05	65		70		75		80		85		90		95	0.000219151	100	2.66574e-05	105	2.57314e-05	110	1.29282e-05	115	5.68324e-05	120	1.8036e-05	125
	5		10		15		20		25		30		35	2.26623e-05	40	3.38516e-05	45	4.80188e-05	50	1.33801e-05	55	6.40993e-05	60	5.3382e-05	65		70		75		80		85		90		95	3.13505e-05	100	2.46971e-05	105	2.85023e-05	110	2.65515e-05	115	4.67235e-05	120	2.19218e-05	125
	5		10		15		20		25		30		35	8.35257e-05	40	2.57917e-05	45	5.52571e-05	50	1.76927e-05	55	7.40361e-05	60	4.56918e-05	65		70		75		80		85		90		95	2.11057e-05	100	4.42525e-05	105	0.000108032	110	2.15796e-05	115	4.75814e-05	120	1.42298e-05	125
	5		10		15		20		25		30		35	2.55718e-05	40	4.65285e-05	45	4.84524e-05	50	2.06777e-05	55	2.85725e-05	60	5.62911e-05	65		70		75		80		85		90		95	0.000105354	100	2.39811e-05	105	3.01144e-05	110	1.7549e-05	115	3.58306e-05	120	1.39598e-05	125
	5		10		15		20		25		30		35	2.5854e-05	40	3.11548e-05	45	2.74763e-05	50	1.94537e-05	55	3.82605e-05	60	2.50118e-05	65		70		75		80		85		90		95	2.11723e-05	100	2.03107e-05	105	5.993e-05	110	1.53588e-05	115	2.99686e-05	120	1.62427e-05	125
	5		10		15		20		25		30		35	4.73438e-05	40	2.28207e-05	45	3.1505e-05	50	1.55639e-05	55	3.47695e-05	60	2.83034e-05	65		70		75		80		85		90		95	2.24879e-05	100	2.8605e-05	105	1.96255e-05	110	5.88413e-05	115	3.22311e-05	120	1.68953e-05	125
	5		10		15		20		25		30		35	2.35607e-05	40	4.0089e-05	45	2.96341e-05	50	1.96029e-05	55	3.4412e-05	60	3.62619e-05	65		70		75		80		85		90		95	2.33585e-05	100	2.95903e-05	105	2.13611e-05	110	2.62177e-05	115	0.000192481	120	2.59256e-05	125
	5		10		15		20		25		30		35	2.58141e-05	40	0.000169733	45	2.98648e-05	50	9.84936e-05	55	2.68973e-05	60	3.61825e-05	65		70		75		80		85		90		95	2.82327e-05	100	2.29842e-05	105	2.27134e-05	110	2.70495e-05	115	3.05836e-05	120	1.56985e-05	125
	5		10		15		20		25		30		35	2.00826e-05	40	2.62605e-05	45	3.06224e-05	50	1.51871e-05	55	3.76211e-05	60	3.15214e-05	65		70		75		80		85		90		95	5.33217e-05	100	0.000133418	105	2.26342e-05	110	3.90823e-05	115	3.22879e-05	120	1.75348e-05	125
	5		10		15		20		25		30		35	3.36714e-05	40	1.9875e-05	45	4.92846e-05	50	1.34471e-05	55	3.47459e-05	60	2.85063e-05	65		70		75		80		85		90		95	2.83413e-05	100	1.83049e-05	105	1.98664e-05	110	1.56835e-05	115	4.91213e-05	120	2.56329e-05	125
	5		10		15		20		25		30		35	2.34663e-05	40	3.03642e-05	45	3.06338e-05	50	4.93889e-05	55	3.02232e-05	60	3.72894e-05	65		70		75		80		85		90		95	2.20515e-05	100	3.06864e-05	105	2.66088e-05	110	4.14785e-05	115	2.9542e-05	120	2.21668e-05	125
	5		10		15		20		25		30		35	2.23722e-05	40	2.11658e-05	45	3.87178e-05	50	1.31197e-05	55	2.73461e-05	60	4.18491e-05	65		70		75		80		85		90		95	2.25877e-05	100	2.47186e-05	105	2.39033e-05	110	2.30718e-05	115	3.02759e-05	120	1.89205e-05	125
	5		10		15		20		25		30		35	3.03127e-05	40	2.35657e-05	45	4.02466e-05	50	2.9822e-05	55	6.11517e-05	60	3.1284e-05	65		70		75		80		85		90		95	2.69018e-05	100	5.03622e-05	105	2.27519e-05	110	1.35955e-05	115	3.46009e-05	120	1.36011e-05	125
	5		10		15		20		25		30		35	3.68527e-05	40	2.40935e-05	45	3.22918e-05	50	2.13535e-05	55	2.92832e-05	60	2.59988e-05	65		70		75		80		85		90		95	2.20477e-05	100	1.92916e-05	105	2.16921e-05	110	1.23943e-05	115	3.35349e-05	120	1.48738e-05	125
	5		10		15		20		25		30		35	2.00996e-05	40	2.50445e-05	45	3.7187e-05	50	1.51548e-05	55	3.05042e-05	60	4.29049e-05	65		70		75		80		85		90		95	2.76114e-05	100	1.70767e-05	105	1.97991e-05	110	1.64045e-05	115	4.37496e-05	120	1.44341e-05	125
	5		10		15		20		25		30		35	2.13378e-05	40	1.96653e-05	45	4.40607e-05	50	1.30628e-05	55	2.83999e-05	60	2.82074e-05	65		70		75		80		85		90		95	3.02457e-05	100	1.9305e-05	105	2.61397e-05	110	1.54516e-05	115	4.73028e-05	120	1.35204e-05	125
	5		10		15		20		25		30		35	2.22612e-05	40	4.21572e-05	45	2.94691e-05	50	1.93641e-05	55	3.23948e-05	60	3.30336e-05	65		70		75		80		85		90		95	2.20848e-05	100	2.50311e-05	105	0.000246332	110	1.95175e-05	115	3.61335e-05	120	1.39586e-05	125
	5		10		15		20		25		30		35	2.0515e-05	40	3.17501e-05	45	3.87837e-05	50	1.44992e-05	55	5.26544e-05	60	3.51485e-05	65		70		75		80		85		90		95	9.14297e-05	100	1.755e-05	105	0.000143942	110	2.4235e-05	115	2.96722e-05	120	1.38219e-05	125
	5		10		15		20		25		30		35	8.01272e-05	40	3.90257e-05	45	2.94962e-05	50	1.37382e-05	55	3.98996e-05	60	4.2652e-05	65		70		75		80		85		90		95	3.03127e-05	100	3.30815e-05	105	0.00024786	110	1.90842e-05	115	3.82356e-05	120	1.42864e-05	125
	5		10		15		20		25		30		35	4.90016e-05	40	5.70433e-05	45	2.85862e-05	50	1.3642e-05	55	3.24731e-05	60	3.50928e-05	65		70		75		80		85		90		95	2.17477e-05	100	2.10419e-05	105	2.05324e-05	110	2.24978e-05	115	3.85449e-05	120	4.92536e-05	125
	5		10		15		20		25		30		35	2.07505e-05	40	4.076e-05	45	0.000294708	50	1.74508e-05	55	2.74153e-05	60	4.26973e-05	65		70		75		80		85		90		95	2.64986e-05	100	3.69991e-05	105	0.000389769	110	1.78978e-05	115	3.00166e-05	120	1.52567e-05	125
	5		10		15		20		25		30		35	2.85376e-05	40	4.51126e-05	45	0.000130587	50	1.32611e-05	55	3.50423e-05	60	3.77448e-05	65		70		75		80		85		90		95	3.00026e-05	100	1.93296e-05	105	2.16409e-05	110	2.35003e-05	115	0.000121054	120	1.74297e-05	125
	5		10		15		20		25		30		35	2.36439e-05	40	2.10023e-05	45	2.89965e-05	50	1.41533e-05	55	3.1454e-05	60	4.75178e-05	65		70		75		80		85		90		95	5.20405e-05	100	2.30039e-05	105	2.70781e-05	110	6.27943e-05	115	3.41067e-05	120	2.65389e-05	125
	5		10		15		20		25		30		35	0.000389839	40	2.00712e-05	45	3.23836e-05	50	1.5823e-05	55	4.76281e-05	60	3.21576e-05	65		70		75		80		85		90		95	3.23031e-05	100	1.7828e-05	105	2.19502e-05	110	0.000101187	115	3.0312e-05	120	1.76452e-05	125
	5		10		15		20		25		30		35	2.52028e-05	40	2.44286e-05	45	8.57881e-05	50	1.55697e-05	55	3.96201e-05	60	2.82854e-05	65		70		75		80		85		90		95	2.83554e-05	100	2.78315e-05	105	2.51296e-05	110	1.96016e-05	115	4.37994e-05	120	1.6415e-05	125
	5		10		15		20		25		30		35	0.000166035	40	1.94932e-05	45	2.71399e-05	50	1.30653e-05	55	4.1853e-05	60	3.78603e-05	65		70		75		80		85		90		95	2.15937e-05	100	1.76953e-05	105	2.17508e-05	110	0.000106881	115	4.60735e-05	120	4.98426e-05	125
	5		10		15		20		25		30		35	3.74579e-05	40	4.62371e-05	45	3.01407e-05	50	1.49244e-05	55	3.13202e-05	60	5.78468e-05	65		70		75		80		85		90		95	7.20936e-05	100	2.64115e-05	105	3.52894e-05	110	1.51048e-05	115	3.72246e-05	120	1.93479e-05	125
	5		10		15		20		25		30		35	6.03353e-05	40	3.36916e-05	45	3.73008e-05	50	1.59667e-05	55	3.64255e-05	60	4.5636e-05	65		70		75		80		85		90		95	2.21455e-05	100	1.85099e-05	105	2.42271e-05	110	6.03197e-05	115	3.88403e-05	120	1.52537e-05	125
	5		10		15		20		25		30		35	6.47504e-05	40	4.63623e-05	45	4.04149e-05	50	6.42621e-05	55	2.91912e-05	60	3.48172e-05	65		70		75		80		85		90		95	2.12941e-05	100	2.46292e-05	105	1.97456e-05	110	2.26052e-05	115	5.57074e-05	120	2.00742e-05	125
	5		10		15		20		25		30		35	2.14169e-05	40	2.41505e-05	45	3.99515e-05	50	5.91259e-05	55	6.42037e-05	60	3.56238e-05	65		70		75		80		85		90		95	2.45504e-05	100	2.13156e-05	105	1.98106e-05	110	8.5123e-05	115	4.82004e-05	120	1.50758e-05	125
	5		10		15		20		25		30		35	5.17551e-05	40	4.32487e-05	45	3.3832e-05	50	1.35578e-05	55	5.4656e-05	60	3.08016e-05	65		70		75		80		85		90		95	3.33451e-05	100	2.1808e-05	105	2.34492e-05	110	2.10177e-05	115	2.9607e-05	120	1.41554e-05	125
	5		10		15		20		25		30		35	2.36068e-05	40	2.20924e-05	45	4.06842e-05	50	5.80708e-05	55	5.50814e-05	60	4.99754e-05	65		70		75		80		85		90		95	4.3581e-05	100	1.93413e-05	105	3.20978e-05	110	2.63634e-05	115	3.05409e-05	120	1.48317e-05	125
	5		10		15		20		25		30		35	2.05273e-05	40	5.15312e-05	45	3.44967e-05	50	1.31676e-05	55	2.89333e-05	60	2.99211e-05	65		70		75		80		85		90		95	2.37877e-05	100	1.93722e-05	105	2.08032e-05	110	2.90364e-05	115	3.04784e-05	120	1.56896e-05	125
	5		10		15		20		25		30		35	2.7284e-05	40	2.36896e-05	45	3.5074e-05	50	2.01855e-05	55	2.854e-05	60	3.73519e-05	65		70		75		80		85		90		95	3.46922e-05	100	2.16055e-05	105	6.11273e-05	110	3.4799e-05	115	3.76848e-05	120	2.65285e-05	125
	5		10		15		20		25		30		35	3.14996e-05	40	3.01118e-05	45	3.25215e-05	50	1.39051e-05	55	2.90638e-05	60	2.70456e-05	65		70		75		80		85		90		95	2.27252e-05	100	2.05478e-05	105	6.98616e-05	110	1.37788e-05	115	4.02006e-05	120	2.40951e-05	125
	5		10		15		20		25		30		35	2.42095e-05	40	2.14432e-05	45	3.28436e-05	50	1.76228e-05	55	2.69986e-05	60	4.15844e-05	65		70		75		80		85		90		95	2.61026e-05	100	1.70478e-05	105	0.000144167	110	2.61496e-05	115	4.48447e-05	120	1.96298e-05	125
	5		10		15		20		25		30		35	2.65794e-05	40	0.000263221	45	2.86462e-05	50	1.70209e-05	55	3.88131e-05	60	4.03221e-05	65		70		75		80		85		90		95	2.40359e-05	100	1.74731e-05	105	3.92402e-05	110	5.75522e-05	115	5.99776e-05	120	1.64061e-05	125
	5		10		15		20		25		30		35	2.5043e-05	40	2.65423e-05	45	3.50318e-05	50	1.37484e-05	55	3.20401e-05	60	4.50525e-05	65		70		75		80		85		90		95	2.65693e-05	100	2.15308e-05	105	1.95729e-05	110	5.72597e-05	115	4.55872e-05	120	2.8443e-05	125
	5		10		15		20		25		30		35	2.09023e-05	40	2.85863e-05	45	3.58893e-05	50	1.63985e-05	55	5.23096e-05	60	3.19431e-05	65		70		75		80		85		90		95	2.63687e-05	100	2.53862e-05	105	3.50505e-05	110	9.65276e-05	115	3.27784e-05	120	1.8936e-05	125
	5		10		15		20		25		30		35	3.41976e-05	40	1.91569e-05	45	5.16703e-05	50	1.37776e-05	55	3.00767e-05	60	3.69092e-05	65		70		75		80		85		90		95	2.9003e-05	100	2.89818e-05	105	2.77738e-05	110	0.000138581	115	3.2589e-05	120	1.36478e-05	125
	5		10		15		20		25		30		35	2.05516e-05	40	5.46011e-05	45	3.10896e-05	50	1.6805e-05	55	3.19317e-05	60	3.516e-05	65		70		75		80		85		90		95	3.56937e-05	100	3.03338e-05	105	2.04709e-05	110	4.04416e-05	115	3.04108e-05	120	9.7774e-05	125
	5		10		15		20		25		30		35	5.66591e-05	40	2.63718e-05	45	3.27247e-05	50	1.69227e-05	55	3.19045e-05	60	3.49987e-05	65		70		75		80		85		90		95	0.000198001	100	2.46058e-05	105	2.4761e-05	110	3.58274e-05	115	2.99971e-05	120	1.7285e-05	125
	5		10		15		20		25		30		35	2.21411e-05	40	1.91838e-05	45	0.000196025	50	1.34556e-05	55	3.49213e-05	60	2.81898e-05	65		70		75		80		85		90		95	2.4384e-05	100	1.69426e-05	105	0.00022659	110	4.35426e-05	115	6.64407e-05	120	1.70823e-05	125
	5		10		15		20		25		30		35	2.7501e-05	40	4.07529e-05	45	3.16888e-05	50	1.41776e-05	55	2.98126e-05	60	3.07081e-05	65		70		75		80		85		90		95	2.99896e-05	100	2.37677e-05	105	0.00017873	110	3.61934e-05	115	3.01245e-05	120	1.39977e-05	125
	5		10		15		20		25		30		35	2.01049e-05	40	3.01485e-05	45	2.88271e-05	50	1.5018e-05	55	3.09639e-05	60	5.25768e-05	65		70		75		80		85		90		95	2.40495e-05	100	2.32175e-05	105	2.18196e-05	110	3.14357e-05	115	4.39472e-05	120	1.51096e-05	125
	5		10		15		20		25		30		35	0.000117024	40	5.75084e-05	45	0.000230025	50	1.82696e-05	55	4.29265e-05	60	3.4243e-05	65		70		75		80		85		90		95	3.74951e-05	100	2.19096e-05	105	2.28851e-05	110	1.44223e-05	115	5.39792e-05	120	1.57979e-05	125
	5		10		15		20		25		30		35	2.4868e-05	40	3.07261e-05	45	3.80498e-05	50	1.3464e-05	55	3.2517e-05	60	4.33459e-05	65		70		75		80		85		90		95	3.2746e-05	100	2.97394e-05	105	2.18526e-05	110	3.56606e-05	115	3.90974e-05	120	2.65046e-05	125
	5		10		15		20		25		30		35	3.44967e-05	40	0.000254684	45	3.60756e-05	50	1.42829e-05	55	2.94294e-05	60	2.97134e-05	65		70		75		80		85		90		95	9.67616e-05	100	1.8613e-05	105	1.95021e-05	110	2.2752e-05	115	3.95824e-05	120	5.29459e-05	125
	5		10		15		20		25		30		35	5.95164e-05	40	7.16206e-05	45	2.67541e-05	50	1.31846e-05	55	4.768e-05	60	2.5296e-05	65		70		75		80		85		90		95	2.492e-05	100	1.90322e-05	105	3.35872e-05	110	3.29462e-05	115	4.06353e-05	120	1.39281e-05	125
	5		10		15		20		25		30		35	3.15233e-05	40	3.85288e-05	45	2.83284e-05	50	1.94841e-05	55	3.93196e-05	60	3.03802e-05	65		70		75		80		85		90		95	2.19512e-05	100	3.44513e-05	105	2.80385e-05	110	1.44797e-05	115	3.89532e-05	120	1.74546e-05	125
	5		10		15		20		25		30		35	2.94146e-05	40	3.65727e-05	45	5.22894e-05	50	1.30585e-05	55	2.68489e-05	60	3.88868e-05	65		70		75		80		85		90		95	2.8088e-05	100	1.99409e-05	105	2.93004e-05	110	3.40537e-05	115	3.29598e-05	120	1.49523e-05	125
	5		10		15		20		25		30		35	6.80628e-05	40	3.79534e-05	45	2.7941e-05	50	1.42107e-05	55	3.30454e-05	60	2.57893e-05	65		70		75		80		85		90		95	5.50035e-05	100	3.53281e-05	105	7.38965e-05	110	2.39177e-05	115	4.03596e-05	120	1.75904e-05	125
	5		10		15		20		25		30		35	3.32969e-05	40	3.34229e-05	45	4.24775e-05	50	0.000106466	55	2.7818e-05	60	5.41113e-05	65		70		75		80		85		90		95	3.51602e-05	100	4.10036e-05	105	8.44657e-05	110	1.41682e-05	115	4.25205e-05	120	1.41842e-05	125
	5		10		15		20		25		30		35	0.000122279	40	7.97133e-05	45	2.74355e-05	50	2.78252e-05	55	2.66598e-05	60	5.37638e-05	65		70		75		80		85		90		95	3.11381e-05	100	3.12092e-05	105	2.34687e-05	110	1.53754e-05	115	4.70872e-05	120	1.50771e-05	125
	5		10		15		20		25		30		35	2.40135e-05	40	0.000675788	45	2.79028e-05	50	2.99842e-05	55	3.37703e-05	60	3.10881e-05	65		70		75		80		85		90		95	2.30454e-05	100	2.09774e-05	105	3.65185e-05	110	6.11963e-05	115	6.60394e-05	120	1.37937e-05	125
	5		10		15		20		25		30		35	2.16664e-05	40	5.87582e-05	45	5.57114e-05	50	1.75444e-05	55	2.88073e-05	60	3.06845e-05	65		70		75		80		85		90		95	2.35374e-05	100	1.68594e-05	105	5.56007e-05	110	1.65431e-05	115	7.66527e-05	120	1.55677e-05	125
	5		10		15		20		25		30		35	2.3935e-05	40	8.6542e-05	45	6.9921e-05	50	1.56825e-05	55	2.75606e-05	60	3.1444e-05	65		70		75		80		85		90		95	2.62452e-05	100	2.7715e-05	105	2.07306e-05	110	3.32498e-05	115	3.06283e-05	120	1.6156e-05	125
	5		10		15		20		25		30		35	3.15867e-05	40	4.93996e-05	45	2.65035e-05	50	1.45473e-05	55	4.79924e-05	60	2.78034e-05	65		70		75		80		85		90		95	2.834e-05	100	2.19645e-05	105	2.10598e-05	110	0.000175054	115	3.18363e-05	120	4.75879e-05	125
	5		10		15		20		25		30		35	2.62091e-05	40	4.41376e-05	45	2.77493e-05	50	1.32687e-05	55	5.74924e-05	60	4.7339e-05	65		70		75		80		85		90		95	3.21088e-05	100	1.89249e-05	105	2.18022e-05	110	2.92763e-05	115	7.21965e-05	120	1.41265e-05	125
	5		10		15		20		25		30		35	3.42689e-05	40	0.00131211	45	3.60466e-05	50	1.49408e-05	55	3.71379e-05	60	4.07113e-05	65		70		75		80		85		90		95	2.49382e-05	100	3.992e-05	105	0.000120198	110	2.80953e-05	115	9.01421e-05	120	1.53559e-05	125
	5		10		15		20		25		30		35	0.000136608	40	6.55186e-05	45	2.81962e-05	50	1.46019e-05	55	2.68796e-05	60	2.9169e-05	65		70		75		80		85		90		95	4.22367e-05	100	1.76692e-05	105	2.29704e-05	110	2.56127e-05	115	4.26062e-05	120	0.000145596	125
	5		10		15		20		25		30		35	3.45346e-05	40	1.86441e-05	45	3.23027e-05	50	1.51188e-05	55	5.04569e-05	60	2.65581e-05	65		70		75		80		85		90		95	2.83499e-05	100	3.19165e-05	105	4.77883e-05	110	1.80891e-05	115	3.31274e-05	120	1.55128e-05	125
	5		10		15		20		25		30		35	2.41186e-05	40	2.34908e-05	45	3.20731e-05	50	4.13861e-05	55	5.2503e-05	60	4.84099e-05	65		70		75		80		85		90		95	2.28771e-05	100	2.40822e-05	105	6.08983e-05	110	1.59303e-05	115	3.70877e-05	120	1.37773e-05	125
	5		10		15		20		25		30		35	2.59138e-05	40	4.92607e-05	45	3.78992e-05	50	2.9377e-05	55	2.77883e-05	60	3.86501e-05	65		70		75		80		85		90		95	3.60724e-05	100	2.24489e-05	105	6.66768e-05	110	4.30261e-05	115	0.00018224	120	1.55957e-05	125
	5		10		15		20		25		30		35	0.000113403	40	5.64157e-05	45	2.66655e-05	50	1.53967e-05	55	3.28392e-05	60	3.29987e-05	65		70		75		80		85		90		95	2.76761e-05	100	3.86574e-05	105	7.92799e-05	110	2.12142e-05	115	3.19276e-05	120	1.37283e-05	125
	5		10		15		20		25		30		35	0.00028547	40	2.69466e-05	45	2.99357e-05	50	2.7824e-05	55	2.89894e-05	60	2.73781e-05	65		70		75		80		85		90		95	2.09925e-05	100	3.09519e-05	105	1.96204e-05	110	4.25633e-05	115	6.50065e-05	120	1.85502e-05	125
	5		10		15		20		25		30		35	3.24023e-05	40	4.55657e-05	45	4.66162e-05	50	2.83363e-05	55	3.32555e-05	60	5.51176e-05	65		70		75		80		85		90		95	3.6051e-05	100	2.05086e-05	105	3.01057e-05	110	1.38594e-05	115	3.12302e-05	120	3.41696e-05	125
	5		10		15		20		25		30		35	2.02136e-05	40	4.09623e-05	45	2.95798e-05	50	1.81928e-05	55	7.43436e-05	60	2.63096e-05	65		70		75		80		85		90		95	3.08043e-05	100	2.75076e-05	105	2.42977e-05	110	5.28361e-05	115	3.87146e-05	120	2.12675e-05	125
	5		10		15		20		25		30		35	9.70525e-05	40	2.43923e-05	45	4.3829e-05	50	1.36564e-05	55	3.04254e-05	60	4.34605e-05	65		70		75		80		85		90		95	2.55436e-05	100	2.7142e-05	105	3.49381e-05	110	2.65883e-05	115	3.36967e-05	120	1.741e-05	125
	5		10		15		20		25		30		35	5.02763e-05	40	2.47143e-05	45	6.33797e-05	50	1.30792e-05	55	3.06057e-05	60	3.95835e-05	65		70		75		80		85		90		95	2.84185e-05	100	3.51924e-05	105	2.05175e-05	110	2.57022e-05	115	2.99273e-05	120	1.75968e-05	125
	5		10		15		20		25		30		35	6.03418e-05	40	2.92067e-05	45	8.70367e-05	50	1.33415e-05	55	3.35693e-05	60	5.15789e-05	65		70		75		80		85		90		95	3.40351e-05	100	2.32384e-05	105	2.55058e-05	110	3.43572e-05	115	0.000138994	120	1.66466e-05	125
	5		10		15		20		25		30		35	2.00895e-05	40	2.16998e-05	45	7.38848e-05	50	1.8249e-05	55	2.78628e-05	60	4.07821e-05	65		70		75		80		85		90		95	2.5702e-05	100	2.11407e-05	105	2.66257e-05	110	6.48493e-05	115	4.23524e-05	120	1.40036e-05	125
	5		10		15		20		25		30		35	3.36875e-05	40	1.80474e-05	45	3.86394e-05	50	1.56489e-05	55	3.15065e-05	60	3.12738e-05	65		70		75		80		85		90		95	2.57153e-05	100	2.07502e-05	105	3.89729e-05	110	1.84199e-05	115	3.38091e-05	120	1.70949e-05	125
	5		10		15		20		25		30		35	2.67194e-05	40	2.09128e-05	45	2.66313e-05	50	1.37219e-05	55	6.04028e-05	60	2.95459e-05	65		70		75		80		85		90		95	2.34867e-05	100	2.78171e-05	105	3.96398e-05	110	1.87183e-05	115	3.22767e-05	120	1.35205e-05	125
	5		10		15		20		25		30		35	3.14264e-05	40	2.58578e-05	45	3.03987e-05	50	6.75089e-05	55	5.37517e-05	60	4.6949e-05	65		70		75		80		85		90		95	2.67541e-05	100	2.35493e-05	105	3.48519e-05	110	1.30532e-05	115	0.000139622	120	1.9064e-05	125
	5		10		15		20		25		30		35	2.29761e-05	40	2.39486e-05	45	2.78093e-05	50	1.46399e-05	55	3.9911e-05	60	4.71573e-05	65		70		75		80		85		90		95	3.17665e-05	100	3.64164e-05	105	2.36691e-05	110	1.30724e-05	115	6.26893e-05	120	1.9386e-05	125
	5		10		15		20		25		30		35	2.72217e-05	40	3.67161e-05	45	2.95843e-05	50	3.60803e-05	55	0.000838164	60	4.5854e-05	65		70		75		80		85		90		95	2.53706e-05	100	2.62394e-05	105	0.000104186	110	5.49108e-05	115	3.58743e-05	120	1.9675e-05	125
	5		10		15		20		25		30		35	5.1875e-05	40	3.73941e-05	45	6.36667e-05	50	4.03005e-05	55	2.72527e-05	60	2.78778e-05	65		70		75		80		85		90		95	2.11243e-05	100	2.28393e-05	105	0.000108561	110	2.61143e-05	115	3.25718e-05	120	1.67779e-05	125
	5		10		15		20		25		30		35	3.55687e-05	40	1.95332e-05	45	4.7653e-05	50	1.36078e-05	55	3.64205e-05	60	2.78158e-05	65		70		75		80		85		90		95	2.14835e-05	100	2.07418e-05	105	0.000104865	110	1.41696e-05	115	4.71832e-05	120	2.04903e-05	125
	5		10		15		20		25		30		35	2.24615e-05	40	3.58481e-05	45	6.27982e-05	50	1.66564e-05	55	3.83252e-05	60	5.88675e-05	65		70		75		80		85		90		95	2.10349e-05	100	1.66364e-05	105	2.03755e-05	110	2.37133e-05	115	3.96707e-05	120	1.67542e-05	125
	5		10		15		20		25		30		35	2.77865e-05	40	1.80458e-05	45	4.80502e-05	50	1.68232e-05	55	3.63471e-05	60	4.45051e-05	65		70		75		80		85		90		95	2.49687e-05	100	2.1976e-05	105	1.99938e-05	110	4.90076e-05	115	9.8799e-05	120	2.12954e-05	125
	5		10		15		20		25		30		35	3.36767e-05	40	3.92561e-05	45	3.16717e-05	50	2.17579e-05	55	3.37907e-05	60	3.3563e-05	65		70		75		80		85		90		95	2.25585e-05	100	4.02519e-05	105	2.63616e-05	110	1.72311e-05	115	3.07068e-05	120	1.54477e-05	125
	5		10		15		20		25		30		35	0.000112653	40	2.00473e-05	45	3.5502e-05	50	1.61924e-05	55	2.95123e-05	60	2.60116e-05	65		70		75		80		85		90		95	2.31295e-05	100	3.13918e-05	105	2.57055e-05	110	1.46674e-05	115	3.2196e-05	120	1.48686e-05	125
	5		10		15		20		25		30		35	8.05402e-05	40	2.58634e-05	45	2.95941e-05	50	1.91803e-05	55	4.23872e-05	60	4.10824e-05	65		70		75		80		85		90		95	2.48227e-05	100	1.71793e-05	105	7.02786e-05	110	2.69517e-05	115	3.04078e-05	120	1.5657e-05	125
	5		10		15		20		25		30		35	3.52177e-05	40	2.57565e-05	45	6.34551e-05	50	1.39287e-05	55	4.39294e-05	60	6.12543e-05	65		70		75		80		85		90		95	2.29056e-05	100	3.78628e-05	105	9.29038e-05	110	1.28972e-05	115	3.59075e-05	120	1.91126e-05	125
	5		10		15		20		25		30		35	0.000334032	40	2.15269e-05	45	4.5424e-05	50	1.70576e-05	55	3.68281e-05	60	2.73929e-05	65		70		75		80		85		90		95	3.00656e-05	100	2.65509e-05	105	2.21389e-05	110	2.37777e-05	115	3.79125e-05	120	2.3612e-05	125
	5		10		15		20		25		30		35	9.84643e-05	40	3.25894e-05	45	3.43873e-05	50	1.73847e-05	55	2.73614e-05	60	2.8699e-05	65		70		75		80		85		90		95	2.34299e-05	100	1.77118e-05	105	2.38724e-05	110	1.67246e-05	115	0.00011495	120	1.5185e-05	125
	5		10		15		20		25		30		35	2.01924e-05	40	2.41358e-05	45	2.75292e-05	50	4.09999e-05	55	0.000147391	60	3.712e-05	65		70		75		80		85		90		95	2.55601e-05	100	2.56367e-05	105	2.03856e-05	110	2.98587e-05	115	3.87412e-05	120	5.06184e-05	125
	5		10		15		20		25		30		35	3.52724e-05	40	3.03757e-05	45	3.36785e-05	50	3.81564e-05	55	2.70861e-05	60	3.96091e-05	65		70		75		80		85		90		95	4.3005e-05	100	3.30481e-05	105	2.91559e-05	110	3.83197e-05	115	3.3272e-05	120	3.41004e-05	125
	5		10		15		20		25		30		35	3.11865e-05	40	4.6193e-05	45	2.80767e-05	50	2.15707e-05	55	5.06553e-05	60	5.64054e-05	65		70		75		80		85		90		95	2.65111e-05	100	1.82209e-05	105	2.11821e-05	110	2.83551e-05	115	3.30604e-05	120	1.85677e-05	125
	5		10		15		20		25		30		35	2.9428e-05	40	2.55392e-05	45	2.85068e-05	50	1.42291e-05	55	4.25802e-05	60	4.59076e-05	65		70		75		80		85		90		95	2.30096e-05	100	3.36474e-05	105	0.000133922	110	3.05656e-05	115	2.9878e-05	120	1.47311e-05	125
	5		10		15		20		25		30		35	3.92775e-05	40	3.27353e-05	45	3.16866e-05	50	1.4903e-05	55	4.5676e-05	60	3.95664e-05	65		70		75		80		85		90		95	3.31513e-05	100	3.59883e-05	105	4.47696e-05	110	3.32199e-05	115	2.96666e-05	120	2.30736e-05	125
	5		10		15		20		25		30		35	6.15046e-05	40	1.90684e-05	45	3.45906e-05	50	1.42163e-05	55	6.06023e-05	60	5.81217e-05	65		70		75		80		85		90		95	2.44823e-05	100	1.83705e-05	105	5.67491e-05	110	3.32865e-05	115	3.22419e-05	120	1.47842e-05	125
	5		10		15		20		25		30		35	2.86664e-05	40	1.84317e-05	45	4.22765e-05	50	1.34636e-05	55	2.98597e-05	60	3.73673e-05	65		70		75		80		85		90		95	3.02454e-05	100	1.79365e-05	105	3.25854e-05	110	5.44641e-05	115	2.97539e-05	120	1.40359e-05	125
	5		10		15		20		25		30		35	2.19081e-05	40	4.36632e-05	45	0.000167802	50	1.36624e-05	55	2.77596e-05	60	2.6521e-05	65		70		75		80		85		90		95	3.99544e-05	100	5.14748e-05	105	3.12052e-05	110	4.31639e-05	115	3.38831e-05	120	1.71047e-05	125
	5		10		15		20		25		30		35	4.83858e-05	40	1.9927e-05	45	2.70143e-05	50	1.72221e-05	55	2.84427e-05	60	3.64866e-05	65		70		75		80		85		90		95	2.32681e-05	100	2.2769e-05	105	2.76895e-05	110	7.22747e-05	115	4.45393e-05	120	1.86284e-05	125
	5		10		15		20		25		30		35	2.14429e-05	40	1.87667e-05	45	4.48909e-05	50	1.40866e-05	55	4.16904e-05	60	3.01601e-05	65		70		75		80		85		90		95	3.0636e-05	100	1.86742e-05	105	0.000129215	110	1.66638e-05	115	3.07437e-05	120	2.21821e-05	125
	5		10		15		20		25		30		35	2.06082e-05	40	2.04347e-05	45	4.15837e-05	50	1.38458e-05	55	8.85667e-05	60	3.76465e-05	65		70		75		80		85		90		95	3.5559e-05	100	4.51103e-05	105	2.21479e-05	110	2.75648e-05	115	3.53232e-05	120	1.36789e-05	125
	5		10		15		20		25		30		35	4.16214e-05	40	1.85307e-05	45	3.74635e-05	50	1.30424e-05	55	3.79085e-05	60	3.23786e-05	65		70		75		80		85		90		95	5.12555e-05	100	2.54185e-05	105	2.2188e-05	110	2.25885e-05	115	3.79985e-05	120	1.42927e-05	125
	5		10		15		20		25		30		35	2.05047e-05	40	2.77951e-05	45	2.80129e-05	50	1.38689e-05	55	2.90344e-05	60	5.64239e-05	65		70		75		80		85		90		95	4.02277e-05	100	2.34863e-05	105	0.000300914	110	2.25945e-05	115	4.65418e-05	120	1.57068e-05	125
	5		10		15		20		25		30		35	2.46262e-05	40	2.57682e-05	45	5.30702e-05	50	2.2563e-05	55	3.75413e-05	60	2.954e-05	65		70		75		80		85		90		95	3.71089e-05	100	1.98082e-05	105	2.29942e-05	110	1.88838e-05	115	3.72178e-05	120	0.000127367	125
	5		10		15		20		25		30		35	2.31418e-05	40	2.32979e-05	45	6.56997e-05	50	1.84779e-05	55	2.94273e-05	60	3.26746e-05	65		70		75		80		85		90		95	2.15072e-05	100	5.33974e-05	105	2.01714e-05	110	5.53608e-05	115	3.73352e-05	120	1.67341e-05	125
	5		10		15		20		25		30		35	2.42312e-05	40	3.00414e-05	45	4.0435e-05	50	1.30728e-05	55	2.93883e-05	60	2.61258e-05	65		70		75		80		85		90		95	3.29615e-05	100	2.38953e-05	105	2.51575e-05	110	1.27752e-05	115	3.67568e-05	120	1.65507e-05	125
	5		10		15		20		25		30		35	2.58341e-05	40	6.16002e-05	45	5.64306e-05	50	4.12935e-05	55	3.4766e-05	60	2.89561e-05	65		70		75		80		85		90		95	3.34718e-05	100	2.03209e-05	105	2.07471e-05	110	1.27877e-05	115	0.000112745	120	2.10505e-05	125
	5		10		15		20		25		30		35	3.52637e-05	40	0.000248073	45	3.2465e-05	50	1.35959e-05	55	5.54519e-05	60	3.53139e-05	65		70		75		80		85		90		95	2.28508e-05	100	3.25782e-05	105	2.06072e-05	110	1.33643e-05	115	3.88854e-05	120	1.47253e-05	125
	5		10		15		20		25		30		35	3.53645e-05	40	2.31324e-05	45	2.70413e-05	50	1.71255e-05	55	8.45228e-05	60	3.08507e-05	65		70		75		80		85		90		95	2.17164e-05	100	2.08994e-05	105	1.96618e-05	110	1.48235e-05	115	3.48342e-05	120	1.5467e-05	125
	5		10		15		20		25		30		35	4.94939e-05	40	3.42603e-05	45	3.27255e-05	50	1.37199e-05	55	3.77839e-05	60	2.57342e-05	65		70		75		80		85		90		95	5.83119e-05	100	3.19723e-05	105	4.03111e-05	110	6.1416e-05	115	5.29003e-05	120	2.07839e-05	125
	5		10		15		20		25		30		35	2.18755e-05	40	3.71617e-05	45	3.01598e-05	50	0.000115391	55	4.4711e-05	60	3.1016e-05	65		70		75		80		85		90		95	2.37983e-05	100	1.88082e-05	105	8.85906e-05	110	2.06054e-05	115	9.85033e-05	120	1.44003e-05	125
	5		10		15		20		25		30		35	2.13305e-05	40	5.56581e-05	45	3.75853e-05	50	0.000125155	55	3.8699e-05	60	5.16568e-05	65		70		75		80		85		90		95	2.14719e-05	100	2.25484e-05	105	0.000101886	110	1.43934e-05	115	5.49803e-05	120	2.57063e-05	125
	5		10		15		20		25		30		35	4.62142e-05	40	2.91913e-05	45	4.3534e-05	50	4.84094e-05	55	3.5351e-05	60	2.50171e-05	65		70		75		80		85		90		95	3.11813e-05	100	4.54649e-05	105	8.63923e-05	110	5.25418e-05	115	4.54058e-05	120	2.84187e-05	125
	5		10		15		20		25		30		35	2.15138e-05	40	4.05877e-05	45	4.31537e-05	50	1.89696e-05	55	2.65719e-05	60	2.87806e-05	65		70		75		80		85		90		95	2.60971e-05	100	4.91538e-05	105	2.14155e-05	110	3.3095e-05	115	3.1212e-05	120	1.68219e-05	125
	5		10		15		20		25		30		35	2.83037e-05	40	2.47912e-05	45	3.7245e-05	50	1.34476e-05	55	2.69428e-05	60	3.19173e-05	65		70		75		80		85		90		95	3.61681e-05	100	1.66196e-05	105	2.10128e-05	110	2.16387e-05	115	3.42124e-05	120	0.000101076	125
	5		10		15		20		25		30		35	9.66506e-05	40	2.20641e-05	45	2.91726e-05	50	1.42697e-05	55	2.71018e-05	60	2.86461e-05	65		70		75		80		85		90		95	3.6035e-05	100	1.8029e-05	105	2.7332e-05	110	2.60224e-05	115	3.30963e-05	120	1.4989e-05	125
	5		10		15		20		25		30		35	2.84457e-05	40	2.75026e-05	45	4.18095e-05	50	1.51183e-05	55	4.1628e-05	60	9.72754e-05	65		70		75		80		85		90		95	2.06534e-05	100	2.60629e-05	105	0.000427036	110	1.26176e-05	115	3.58889e-05	120	1.72415e-05	125
	5		10		15		20		25		30		35	2.66033e-05	40	3.96809e-05	45	4.44784e-05	50	1.35692e-05	55	3.27987e-05	60	2.79639e-05	65		70		75		80		85		90		95	4.28733e-05	100	7.17437e-05	105	2.47508e-05	110	3.8973e-05	115	2.95655e-05	120	1.40163e-05	125
	5		10		15		20		25		30		35	0.000316602	40	5.1648e-05	45	8.64146e-05	50	1.30076e-05	55	2.65728e-05	60	4.33555e-05	65		70		75		80		85		90		95	2.22239e-05	100	1.6509e-05	105	3.19707e-05	110	4.53082e-05	115	3.38833e-05	120	1.60049e-05	125
	5		10		15		20		25		30		35	2.46552e-05	40	2.30333e-05	45	2.65966e-05	50	1.43643e-05	55	3.01497e-05	60	2.95268e-05	65		70		75		80		85		90		95	2.11412e-05	100	2.05662e-05	105	3.74204e-05	110	2.68329e-05	115	3.51396e-05	120	1.92205e-05	125
	5		10		15		20		25		30		35	3.04962e-05	40	2.65315e-05	45	3.77649e-05	50	1.61287e-05	55	2.79187e-05	60	2.59761e-05	65		70		75		80		85		90		95	2.6114e-05	100	2.586e-05	105	5.92584e-05	110	2.83819e-05	115	3.4483e-05	120	1.37477e-05	125
	5		10		15		20		25		30		35	2.10345e-05	40	2.20395e-05	45	2.97392e-05	50	2.5158e-05	55	4.50038e-05	60	2.81968e-05	65		70		75		80		85		90		95	2.79411e-05	100	1.65229e-05	105	6.0125e-05	110	3.63587e-05	115	3.88563e-05	120	1.96046e-05	125
	5		10		15		20		25		30		35	0.000102114	40	1.81145e-05	45	3.30917e-05	50	2.83381e-05	55	2.83049e-05	60	3.73818e-05	65		70		75		80		85		90		95	2.40241e-05	100	2.90177e-05	105	2.28862e-05	110	3.76382e-05	115	3.16349e-05	120	1.4221e-05	125
	5		10		15		20		25		30		35	5.83166e-05	40	5.26875e-05	45	2.89007e-05	50	1.77031e-05	55	2.86516e-05	60	2.81689e-05	65		70		75		80		85		90		95	2.72417e-05	100	3.432e-05	105	7.04927e-05	110	4.29866e-05	115	2.98475e-05	120	2.21499e-05	125
	5		10		15		20		25		30		35	3.05212e-05	40	3.16581e-05	45	2.68641e-05	50	1.37349e-05	55	3.86123e-05	60	3.36969e-05	65		70		75		80		85		90		95	2.49595e-05	100	2.48058e-05	105	7.1213e-05	110	3.57742e-05	115	4.93735e-05	120	1.46901e-05	125
	5		10		15		20		25		30		35	2.24176e-05	40	3.09846e-05	45	3.1112e-05	50	1.99288e-05	55	3.33396e-05	60	4.87515e-05	65		70		75		80		85		90		95	3.49902e-05	100	1.90228e-05	105	0.000117067	110	2.8e-05	115	2.97571e-05	120	2.04264e-05	125
	5		10		15		20		25		30		35	6.57319e-05	40	5.45503e-05	45	0.000268102	50	1.66423e-05	55	4.14143e-05	60	2.76736e-05	65		70		75		80		85		90		95	5.28283e-05	100	3.86043e-05	105	8.53153e-05	110	3.12304e-05	115	0.000174553	120	1.56209e-05	125
	5		10		15		20		25		30		35	6.30044e-05	40	5.29777e-05	45	4.36622e-05	50	1.31522e-05	55	3.39579e-05	60	5.74641e-05	65		70		75		80		85		90		95	3.83812e-05	100	3.4477e-05	105	2.16771e-05	110	3.42421e-05	115	4.29668e-05	120	1.99294e-05	125
	5		10		15		20		25		30		35	2.88151e-05	40	4.31649e-05	45	2.75161e-05	50	1.41663e-05	55	4.63838e-05	60	5.9033e-05	65		70		75		80		85		90		95	2.24207e-05	100	2.96896e-05	105	2.22151e-05	110	1.29964e-05	115	4.11434e-05	120	1.50168e-05	125
	5		10		15		20		25		30		35	2.30811e-05	40	2.01939e-05	45	3.73204e-05	50	1.52449e-05	55	3.23117e-05	60	2.74098e-05	65		70		75		80		85		90		95	2.50415e-05	100	1.98962e-05	105	2.20316e-05	110	0.000117924	115	3.25018e-05	120	1.42775e-05	125
	5		10		15		20		25		30		35	2.25519e-05	40	4.1053e-05	45	3.84117e-05	50	1.67192e-05	55	3.37005e-05	60	3.31054e-05	65		70		75		80		85		90		95	2.30084e-05	100	2.42403e-05	105	0.000273628	110	4.11326e-05	115	3.11576e-05	120	1.53505e-05	125
	5		10		15		20		25		30		35	2.00047e-05	40	2.89419e-05	45	4.60881e-05	50	1.6044e-05	55	2.92666e-05	60	4.43428e-05	65		70		75		80		85		90		95	9.37746e-05	100	2.1556e-05	105	2.31104e-05	110	5.13532e-05	115	6.58218e-05	120	1.37478e-05	125
	5		10		15		20		25		30		35	2.6024e-05	40	1.87615e-05	45	3.26578e-05	50	1.69459e-05	55	3.17508e-05	60	4.54552e-05	65		70		75		80		85		90		95	0.000357511	100	1.91011e-05	105	2.40566e-05	110	1.67667e-05	115	3.62752e-05	120	1.6137e-05	125
	5		10		15		20		25		30		35	0.00011033	40	2.94219e-05	45	4.65639e-05	50	1.5695e-05	55	2.66555e-05	60	2.61547e-05	65		70		75		80		85		90		95	2.88102e-05	100	2.68679e-05	105	2.31305e-05	110	4.66924e-05	115	5.50778e-05	120	1.58968e-05	125
	5		10		15		20		25		30		35	4.57028e-05	40	2.77183e-05	45	3.71933e-05	50	1.3291e-05	55	3.11408e-05	60	2.8971e-05	65		70		75		80		85		90		95	3.23227e-05	100	1.91343e-05	105	0.000256851	110	1.9789e-05	115	5.44767e-05	120	1.9857e-05	125
	5		10		15		20		25		30		35	2.16802e-05	40	1.9266e-05	45	4.62693e-05	50	1.3143e-05	55	3.33531e-05	60	3.27641e-05	65		70		75		80		85		90		95	2.14377e-05	100	2.97596e-05	105	1.98783e-05	110	1.7271e-05	115	3.60497e-05	120	1.42021e-05	125
	5		10		15		20		25		30		35	3.03053e-05	40	2.9552e-05	45	4.4199e-05	50	1.32549e-05	55	4.85256e-05	60	3.86968e-05	65		70		75		80		85		90		95	6.56826e-05	100	3.89136e-05	105	2.01747e-05	110	1.65823e-05	115	4.1825e-05	120	1.66936e-05	125
	5		10		15		20		25		30		35	2.72075e-05	40	2.10142e-05	45	5.61078e-05	50	2.2533e-05	55	4.58967e-05	60	4.37393e-05	65		70		75		80		85		90		95	5.72332e-05	100	2.80698e-05	105	2.17157e-05	110	1.34927e-05	115	3.36544e-05	120	1.80357e-05	125
	5		10		15		20		25		30		35	2.81676e-05	40	2.71172e-05	45	5.46171e-05	50	1.40291e-05	55	3.81954e-05	60	5.40925e-05	65		70		75		80		85		90		95	0.000102444	100	3.47616e-05	105	2.42586e-05	110	1.54377e-05	115	5.07157e-05	120	1.56816e-05	125
	5		10		15		20		25		30		35	2.49038e-05	40	5.18962e-05	45	2.85584e-05	50	1.68524e-05	55	3.81899e-05	60	3.7947e-05	65		70		75		80		85		90		95	2.23865e-05	100	1.77317e-05	105	4.5045e-05	110	2.57209e-05	115	6.77642e-05	120	2.21796e-05	125
	5		10		15		20		25		30		35	0.000116149	40	2.27064e-05	45	2.85723e-05	50	5.3297e-05	55	3.15997e-05	60	0.00023166	65		70		75		80		85		90		95	3.26973e-05	100	1.85431e-05	105	5.41249e-05	110	1.96553e-05	115	4.4411e-05	120	1.84772e-05	125
	5		10		15		20		25		30		35	0.000134506	40	2.1149e-05	45	2.79408e-05	50	4.57704e-05	55	3.09143e-05	60	2.79436e-05	65		70		75		80		85		90		95	0.000268344	100	1.9447e-05	105	5.87595e-05	110	5.8093e-05	115	3.57614e-05	120	1.74638e-05	125
	5		10		15		20		25		30		35	0.000107404	40	1.86409e-05	45	3.22475e-05	50	1.42562e-05	55	5.87225e-05	60	4.11183e-05	65		70		75		80		85		90		95	2.10828e-05	100	1.72675e-05	105	7.87499e-05	110	0.000112521	115	4.16719e-05	120	1.381e-05	125
	5		10		15		20		25		30		35	2.47802e-05	40	2.13148e-05	45	3.91447e-05	50	1.42005e-05	55	4.04026e-05	60	6.94015e-05	65		70		75		80		85		90		95	2.64746e-05	100	2.40341e-05	105	0.000209688	110	4.82352e-05	115	5.57627e-05	120	2.23989e-05	125
	5		10		15		20		25		30		35	2.68405e-05	40	2.42051e-05	45	4.53398e-05	50	2.38559e-05	55	4.38204e-05	60	2.57892e-05	65		70		75		80		85		90		95	2.65835e-05	100	3.05925e-05	105	3.1047e-05	110	1.44523e-05	115	3.696e-05	120	2.19391e-05	125
	5		10		15		20		25		30		35	2.1221e-05	40	3.28431e-05	45	2.74427e-05	50	1.33237e-05	55	3.26261e-05	60	8.60912e-05	65		70		75		80		85		90		95	2.05882e-05	100	1.78019e-05	105	2.03621e-05	110	2.21713e-05	115	4.11665e-05	120	1.38413e-05	125
	5		10		15		20		25		30		35	4.06814e-05	40	1.92294e-05	45	8.24375e-05	50	1.96127e-05	55	3.01764e-05	60	4.01556e-05	65		70		75		80		85		90		95	2.15941e-05	100	2.11108e-05	105	2.06688e-05	110	1.98547e-05	115	3.32069e-05	120	4.33729e-05	125
	5		10		15		20		25		30		35	8.23292e-05	40	3.29003e-05	45	3.49935e-05	50	1.4595e-05	55	4.09977e-05	60	4.48345e-05	65		70		75		80		85		90		95	2.1132e-05	100	2.67783e-05	105	6.71999e-05	110	4.27982e-05	115	2.95831e-05	120	1.54475e-05	125
	5		10		15		20		25		30		35	8.38424e-05	40	2.42819e-05	45	5.61653e-05	50	1.3037e-05	55	3.40384e-05	60	2.64324e-05	65		70		75		80		85		90		95	2.21152e-05	100	2.44816e-05	105	6.25859e-05	110	1.9244e-05	115	3.14531e-05	120	1.87203e-05	125
	5		10		15		20		25		30		35	2.23443e-05	40	3.18185e-05	45	2.75946e-05	50	3.58982e-05	55	0.000238242	60	4.46981e-05	65		70		75		80		85		90		95	2.15439e-05	100	3.73105e-05	105	5.70382e-05	110	9.23376e-05	115	8.72405e-05	120	2.61879e-05	125
	5		10		15		20		25		30		35	3.99821e-05	40	2.59269e-05	45	2.72536e-05	50	3.858e-05	55	2.91948e-05	60	2.66762e-05	65		70		75		80		85		90		95	2.33977e-05	100	2.00142e-05	105	2.35186e-05	110	3.60104e-05	115	4.89648e-05	120	2.1844e-05	125
	5		10		15		20		25		30		35	2.93571e-05	40	1.95817e-05	45	3.7008e-05	50	4.39534e-05	55	0.000168982	60	4.79126e-05	65		70		75		80		85		90		95	3.38038e-05	100	3.19786e-05	105	2.57432e-05	110	2.61789e-05	115	4.35182e-05	120	1.52541e-05	125
	5		10		15		20		25		30		35	0.000123815	40	2.15522e-05	45	3.6188e-05	50	2.96144e-05	55	3.4648e-05	60	3.07246e-05	65		70		75		80		85		90		95	2.50187e-05	100	1.86817e-05	105	2.37712e-05	110	5.55859e-05	115	3.08113e-05	120	1.46937e-05	125
	5		10		15		20		25		30		35	2.09049e-05	40	2.92799e-05	45	2.82141e-05	50	1.56156e-05	55	2.97492e-05	60	3.56514e-05	65		70		75		80		85		90		95	2.11299e-05	100	2.06824e-05	105	3.36422e-05	110	3.95873e-05	115	3.6113e-05	120	2.46547e-05	125
	5		10		15		20		25		30		35	2.33572e-05	40	2.11528e-05	45	4.73531e-05	50	6.41307e-05	55	5.69873e-05	60	0.000428177	65		70		75		80		85		90		95	3.23854e-05	100	2.80416e-05	105	2.11706e-05	110	3.8244e-05	115	4.5081e-05	120	1.41137e-05	125
	5		10		15		20		25		30		35	5.44074e-05	40	3.39263e-05	45	4.256e-05	50	2.77551e-05	55	3.54273e-05	60	0.000127665	65		70		75		80		85		90		95	2.29504e-05	100	2.44487e-05	105	2.06645e-05	110	1.59834e-05	115	3.859e-05	120	3.09616e-05	125
	5		10		15		20		25		30		35	2.34026e-05	40	2.61385e-05	45	2.69708e-05	50	2.003e-05	55	2.7911e-05	60	2.82832e-05	65		70		75		80		85		90		95	3.60532e-05	100	2.03135e-05	105	2.56167e-05	110	2.76974e-05	115	4.3604e-05	120	2.24347e-05	125
	5		10		15		20		25		30		35	2.16499e-05	40	9.92466e-05	45	3.23541e-05	50	1.64126e-05	55	3.16557e-05	60	3.20394e-05	65		70		75		80		85		90		95	4.21014e-05	100	2.90025e-05	105	2.08414e-05	110	8.24583e-05	115	3.89692e-05	120	1.63184e-05	125
	5		10		15		20		25		30		35	3.54426e-05	40	1.99159e-05	45	3.11158e-05	50	1.6193e-05	55	3.66499e-05	60	3.01101e-05	65		70		75		80		85		90		95	2.68078e-05	100	1.8394e-05	105	2.2058e-05	110	2.22392e-05	115	5.22829e-05	120	1.63584e-05	125
	5		10		15		20		25		30		35	2.47435e-05	40	1.89761e-05	45	4.06343e-05	50	1.31762e-05	55	3.41428e-05	60	4.33557e-05	65		70		75		80		85		90		95	3.42894e-05	100	2.84678e-05	105	2.26016e-05	110	2.10435e-05	115	3.32443e-05	120	3.66763e-05	125
	5		10		15		20		25		30		35	2.01365e-05	40	3.42364e-05	45	2.69821e-05	50	1.72471e-05	55	0.000224673	60	3.37559e-05	65		70		75		80		85		90		95	2.61722e-05	100	1.84389e-05	105	0.000121766	110	2.04849e-05	115	3.05144e-05	120	8.43445e-05	125
	5		10		15		20		25		30		35	0.000160475	40	2.20686e-05	45	2.91568e-05	50	1.55159e-05	55	2.82057e-05	60	4.10948e-05	65		70		75		80		85		90		95	2.06691e-05	100	1.66666e-05	105	0.000169021	110	1.53337e-05	115	3.09511e-05	120	1.58472e-05	125
	5		10		15		20		25		30		35	2.33869e-05	40	2.42121e-05	45	3.38065e-05	50	1.41058e-05	55	2.77741e-05	60	2.52414e-05	65		70		75		80		85		90		95	2.22674e-05	100	1.8211e-05	105	0.00014416	110	1.95492e-05	115	3.06717e-05	120	4.12756e-05	125
	5		10		15		20		25		30		35	4.16667e-05	40	1.96485e-05	45	3.93952e-05	50	1.4371e-05	55	2.78639e-05	60	3.90587e-05	65		70		75		80		85		90		95	4.37554e-05	100	3.07406e-05	105	2.04145e-05	110	7.16865e-05	115	3.36619e-05	120	4.65134e-05	125
	5		10		15		20		25		30		35	5.12813e-05	40	1.9623e-05	45	4.58818e-05	50	1.515e-05	55	4.22094e-05	60	2.59063e-05	65		70		75		80		85		90		95	0.00019316	100	2.14204e-05	105	2.04725e-05	110	4.66401e-05	115	0.000145721	120	1.45724e-05	125
	5		10		15		20		25		30		35	4.0669e-05	40	6.11556e-05	45	0.000113779	50	1.40448e-05	55	4.13802e-05	60	4.94149e-05	65		70		75		80		85		90		95	2.96987e-05	100	1.71198e-05	105	2.54236e-05	110	8.74985e-05	115	3.63393e-05	120	2.3997e-05	125
	5		10		15		20		25		30		35	2.88082e-05	40	2.63806e-05	45	2.82144e-05	50	1.88706e-05	55	3.37169e-05	60	3.86062e-05	65		70		75		80		85		90		95	7.90702e-05	100	2.87534e-05	105	1.95563e-05	110	2.45559e-05	115	3.11719e-05	120	1.42423e-05	125
	5		10		15		20		25		30		35	4.15684e-05	40	2.03324e-05	45	3.29351e-05	50	1.42442e-05	55	2.92944e-05	60	2.79674e-05	65		70		75		80		85		90		95	8.09777e-05	100	2.94331e-05	105	2.4717e-05	110	5.01302e-05	115	2.9663e-05	120	1.39738e-05	125
	5		10		15		20		25		30		35	3.28035e-05	40	4.54818e-05	45	3.45792e-05	50	1.45771e-05	55	7.82437e-05	60	2.58109e-05	65		70		75		80		85		90		95	3.90425e-05	100	3.60737e-05	105	2.38126e-05	110	2.26646e-05	115	4.27645e-05	120	1.36976e-05	125
	5		10		15		20		25		30		35	5.19083e-05	40	3.32645e-05	45	2.79183e-05	50	1.35764e-05	55	2.68149e-05	60	2.71249e-05	65		70		75		80		85		90		95	2.521e-05	100	1.72747e-05	105	3.1249e-05	110	1.86412e-05	115	0.000100412	120	1.83293e-05	125
	5		10		15		20		25		30		35	2.06827e-05	40	2.65518e-05	45	2.97244e-05	50	1.44594e-05	55	3.25946e-05	60	4.04852e-05	65		70		75		80		85		90		95	2.59941e-05	100	3.76095e-05	105	2.035e-05	110	3.89607e-05	115	3.33186e-05	120	1.49825e-05	125
	5		10		15		20		25		30		35	2.45932e-05	40	3.33474e-05	45	4.15582e-05	50	1.61516e-05	55	3.33028e-05	60	3.60327e-05	65		70		75		80		85		90		95	3.84185e-05	100	3.03445e-05	105	2.53237e-05	110	5.56151e-05	115	2.98799e-05	120	2.01993e-05	125
	5		10		15		20		25		30		35	4.16642e-05	40	2.41547e-05	45	3.13978e-05	50	1.605e-05	55	4.62066e-05	60	2.729e-05	65		70		75		80		85		90		95	2.60302e-05	100	1.65272e-05	105	2.03779e-05	110	6.43359e-05	115	3.75879e-05	120	1.87575e-05	125
	5		10		15		20		25		30		35	2.11331e-05	40	3.0685e-05	45	8.61638e-05	50	1.86061e-05	55	4.26061e-05	60	3.04355e-05	65		70		75		80		85		90		95	3.02101e-05	100	3.83498e-05	105	2.26369e-05	110	1.61599e-05	115	3.00976e-05	120	2.06544e-05	125
	5		10		15		20		25		30		35	0.000154798	40	3.46224e-05	45	5.73511e-05	50	1.31263e-05	55	2.90106e-05	60	2.51044e-05	65		70		75		80		85		90		95	2.09703e-05	100	3.60864e-05	105	2.20457e-05	110	3.36124e-05	115	5.19128e-05	120	1.92119e-05	125
	5		10		15		20		25		30		35	2.27725e-05	40	1.86621e-05	45	2.68296e-05	50	1.85571e-05	55	0.00013264	60	3.87433e-05	65		70		75		80		85		90		95	3.15193e-05	100	2.46306e-05	105	3.04598e-05	110	1.84217e-05	115	3.33201e-05	120	1.58189e-05	125
	5		10		15		20		25		30		35	2.101e-05	40	4.23768e-05	45	2.79772e-05	50	1.41028e-05	55	3.38718e-05	60	4.71139e-05	65		70		75		80		85		90		95	3.31018e-05	100	2.83589e-05	105	2.45489e-05	110	0.000135215	115	3.30087e-05	120	1.70344e-05	125
	5		10		15		20		25		30		35	3.15255e-05	40	5.98449e-05	45	5.09288e-05	50	1.46572e-05	55	2.82584e-05	60	5.52659e-05	65		70		75		80		85		90		95	3.47061e-05	100	1.80313e-05	105	4.25528e-05	110	6.76664e-05	115	3.66309e-05	120	1.66385e-05	125
	5		10		15		20		25		30		35	2.08666e-05	40	5.73836e-05	45	3.57468e-05	50	1.49077e-05	55	2.70741e-05	60	3.9158e-05	65		70		75		80		85		90		95	3.62721e-05	100	2.38273e-05	105	2.89161e-05	110	1.85e-05	115	3.10758e-05	120	2.94116e-05	125
	5		10		15		20		25		30		35	2.09532e-05	40	3.08545e-05	45	3.51855e-05	50	5.40923e-05	55	2.93805e-05	60	4.16315e-05	65		70		75		80		85		90		95	3.25963e-05	100	2.21709e-05	105	2.07243e-05	110	4.18053e-05	115	3.38278e-05	120	2.07913e-05	125
	5		10		15		20		25		30		35	2.51323e-05	40	2.79135e-05	45	3.51002e-05	50	1.42803e-05	55	3.88451e-05	60	3.25996e-05	65		70		75		80		85		90		95	2.73139e-05	100	3.3858e-05	105	3.76836e-05	110	2.17597e-05	115	3.23648e-05	120	1.36355e-05	125
	5		10		15		20		25		30		35	0.00015509	40	6.61589e-05	45	3.86269e-05	50	1.62036e-05	55	3.67843e-05	60	3.74274e-05	65		70		75		80		85		90		95	3.78813e-05	100	2.10669e-05	105	4.96121e-05	110	1.6959e-05	115	2.96439e-05	120	1.6546e-05	125
	5		10		15		20		25		30		35	2.18899e-05	40	2.58385e-05	45	3.5731e-05	50	2.91917e-05	55	2.65445e-05	60	3.66104e-05	65		70		75		80		85		90		95	4.20706e-05	100	1.93238e-05	105	0.000181663	110	1.69649e-05	115	5.52421e-05	120	1.97364e-05	125
	5		10		15		20		25		30		35	5.25398e-05	40	4.01796e-05	45	2.94413e-05	50	1.47757e-05	55	2.84505e-05	60	3.98967e-05	65		70		75		80		85		90		95	6.23974e-05	100	2.14913e-05	105	2.11402e-05	110	3.77565e-05	115	0.000183718	120	1.48129e-05	125
	5		10		15		20		25		30		35	0.000131025	40	5.45501e-05	45	3.05566e-05	50	1.6566e-05	55	4.67104e-05	60	5.66984e-05	65		70		75		80		85		90		95	2.47691e-05	100	1.87353e-05	105	2.45072e-05	110	3.62741e-05	115	3.05358e-05	120	1.40814e-05	125
	5		10		15		20		25		30		35	2.01402e-05	40	1.86715e-05	45	4.78306e-05	50	7.09158e-05	55	3.81022e-05	60	2.61597e-05	65		70		75		80		85		90		95	2.76951e-05	100	6.74345e-05	105	2.00884e-05	110	5.7228e-05	115	3.50895e-05	120	1.73261e-05	125
	5		10		15		20		25		30		35	2.30766e-05	40	8.41989e-05	45	3.07672e-05	50	1.9945e-05	55	3.21806e-05	60	2.69177e-05	65		70		75		80		85		90		95	2.38481e-05	100	2.22664e-05	105	4.74556e-05	110	7.39329e-05	115	3.13052e-05	120	2.11568e-05	125
	5		10		15		20		25		30		35	6.40856e-05	40	1.98049e-05	45	3.06032e-05	50	1.35727e-05	55	0.000166946	60	2.7513e-05	65		70		75		80		85		90		95	3.60589e-05	100	1.97965e-05	105	2.51778e-05	110	1.74358e-05	115	3.53442e-05	120	1.9375e-05	125
	5		10		15		20		25		30		35	2.01084e-05	40	5.89907e-05	45	3.69193e-05	50	2.09971e-05	55	3.25535e-05	60	2.57297e-05	65		70		75		80		85		90		95	2.81851e-05	100	2.40036e-05	105	0.000234806	110	2.15925e-05	115	4.76048e-05	120	1.51683e-05	125
	5		10		15		20		25		30		35	3.52829e-05	40	2.04221e-05	45	3.89077e-05	50	1.61411e-05	55	2.67335e-05	60	6.74136e-05	65		70		75		80		85		90		95	3.42132e-05	100	1.77561e-05	105	0.000114533	110	6.1982e-05	115	4.89583e-05	120	1.85025e-05	125
	5		10		15		20		25		30		35	2.81614e-05	40	2.14257e-05	45	4.85843e-05	50	1.60614e-05	55	2.91786e-05	60	4.67312e-05	65		70		75		80		85		90		95	2.4256e-05	100	2.1318e-05	105	7.05164e-05	110	1.76238e-05	115	3.00622e-05	120	1.39498e-05	125
	5		10		15		20		25		30		35	5.32397e-05	40	2.71799e-05	45	2.85439e-05	50	1.36718e-05	55	3.18443e-05	60	5.12329e-05	65		70		75		80		85		90		95	0.000248251	100	0.000204224	105	8.05616e-05	110	1.93723e-05	115	3.40001e-05	120	6.92612e-05	125
	5		10		15		20		25		30		35	4.10292e-05	40	1.82058e-05	45	2.75314e-05	50	1.54826e-05	55	2.81253e-05	60	6.87669e-05	65		70		75		80		85		90		95	2.69168e-05	100	7.22315e-05	105	2.07825e-05	110	1.77452e-05	115	3.92239e-05	120	4.01027e-05	125
	5		10		15		20		25		30		35	2.42784e-05	40	2.00963e-05	45	0.000164316	50	1.34218e-05	55	2.86926e-05	60	3.04098e-05	65		70		75		80		85		90		95	2.39359e-05	100	2.31603e-05	105	2.23464e-05	110	9.15967e-05	115	3.01935e-05	120	5.3867e-05	125
	5		10		15		20		25		30		35	0.000289559	40	3.58429e-05	45	3.24461e-05	50	2.69759e-05	55	2.9199e-05	60	2.52519e-05	65		70		75		80		85		90		95	3.82631e-05	100	4.64248e-05	105	0.000112861	110	1.42675e-05	115	3.10371e-05	120	5.08944e-05	125
	5		10		15		20		25		30		35	0.000116896	40	4.58354e-05	45	4.04555e-05	50	2.23865e-05	55	3.22651e-05	60	3.63513e-05	65		70		75		80		85		90		95	2.92635e-05	100	3.45757e-05	105	2.08494e-05	110	7.44502e-05	115	3.33186e-05	120	1.93285e-05	125
	5		10		15		20		25		30		35	2.08351e-05	40	2.62069e-05	45	2.88759e-05	50	1.32555e-05	55	3.34244e-05	60	0.000137845	65		70		75		80		85		90		95	0.000105696	100	2.86657e-05	105	0.000161729	110	1.52354e-05	115	3.4131e-05	120	1.43236e-05	125
	5		10		15		20		25		30		35	4.03444e-05	40	4.00224e-05	45	4.39817e-05	50	1.49585e-05	55	2.90914e-05	60	6.59507e-05	65		70		75		80		85		90		95	2.2454e-05	100	4.43747e-05	105	3.68537e-05	110	1.62713e-05	115	3.49363e-05	120	1.3628e-05	125
	5		10		15		20		25		30		35	2.21376e-05	40	1.95042e-05	45	3.12821e-05	50	1.43442e-05	55	5.07059e-05	60	7.57765e-05	65		70		75		80		85		90		95	2.11548e-05	100	5.24953e-05	105	5.90409e-05	110	1.77354e-05	115	3.31821e-05	120	1.65631e-05	125
	5		10		15		20		25		30		35	4.36313e-05	40	2.53279e-05	45	3.0023e-05	50	3.71323e-05	55	7.4425e-05	60	2.86514e-05	65		70		75		80		85		90		95	6.32418e-05	100	2.19897e-05	105	2.09985e-05	110	5.13005e-05	115	3.22663e-05	120	5.93069e-05	125
	5		10		15		20		25		30		35	2.59101e-05	40	2.46492e-05	45	2.7758e-05	50	1.60632e-05	55	0.000113668	60	3.92196e-05	65		70		75		80		85		90		95	2.28243e-05	100	2.80738e-05	105	2.1969e-05	110	1.87274e-05	115	3.30401e-05	120	4.73219e-05	125
	5		10		15		20		25		30		35	5.76314e-05	40	1.9122e-05	45	3.5249e-05	50	1.35031e-05	55	3.41019e-05	60	2.81893e-05	65		70		75		80		85		90		95	3.11173e-05	100	2.10534e-05	105	8.02824e-05	110	5.56125e-05	115	3.34965e-05	120	1.66063e-05	125
	5		10		15		20		25		30		35	2.39669e-05	40	3.31612e-05	45	3.50664e-05	50	1.63755e-05	55	6.31526e-05	60	2.72338e-05	65		70		75		80		85		90		95	2.51109e-05	100	2.68196e-05	105	9.49258e-05	110	5.65802e-05	115	0.000287927	120	1.44484e-05	125
	5		10		15		20		25		30		35	6.20109e-05	40	3.64984e-05	45	2.76658e-05	50	2.52499e-05	55	5.21624e-05	60	3.65772e-05	65		70		75		80		85		90		95	3.0595e-05	100	2.94931e-05	105	8.45754e-05	110	1.69885e-05	115	4.40483e-05	120	1.52671e-05	125
	5		10		15		20		25		30		35	5.16758e-05	40	2.16515e-05	45	2.99443e-05	50	1.51343e-05	55	4.70265e-05	60	4.59435e-05	65		70		75		80		85		90		95	4.50697e-05	100	1.7163e-05	105	6.42054e-05	110	2.30416e-05	115	3.7253e-05	120	1.88429e-05	125
	5		10		15		20		25		30		35	2.51491e-05	40	2.40644e-05	45	3.37021e-05	50	1.56086e-05	55	5.08231e-05	60	4.84124e-05	65		70		75		80		85		90		95	2.35936e-05	100	1.83238e-05	105	0.000197381	110	3.46831e-05	115	4.90958e-05	120	1.38848e-05	125
	5		10		15		20		25		30		35	2.27307e-05	40	1.80218e-05	45	3.26081e-05	50	1.36332e-05	55	2.71264e-05	60	3.75827e-05	65		70		75		80		85		90		95	2.6827e-05	100	1.75876e-05	105	1.95473e-05	110	3.23557e-05	115	3.76968e-05	120	2.14632e-05	125
	5		10		15		20		25		30		35	2.00347e-05	40	3.7737e-05	45	3.07919e-05	50	1.41053e-05	55	2.90952e-05	60	2.54267e-05	65		70		75		80		85		90		95	2.10134e-05	100	2.65899e-05	105	2.33361e-05	110	5.23546e-05	115	3.23582e-05	120	2.41816e-05	125
	5		10		15		20		25		30		35	5.20117e-05	40	2.67831e-05	45	3.5702e-05	50	1.36249e-05	55	3.0882e-05	60	3.2874e-05	65		70		75		80		85		90		95	2.75408e-05	100	4.02483e-05	105	2.98176e-05	110	3.78678e-05	115	3.47698e-05	120	2.0287e-05	125
	5		10		15		20		25		30		35	5.61075e-05	40	0.000120657	45	3.0153e-05	50	2.3487e-05	55	3.32856e-05	60	2.97889e-05	65		70		75		80		85		90		95	0.000118697	100	2.44853e-05	105	2.05751e-05	110	4.20248e-05	115	3.83711e-05	120	1.84379e-05	125
	5		10		15		20		25		30		35	2.68197e-05	40	3.65044e-05	45	3.81443e-05	50	2.01323e-05	55	3.40945e-05	60	3.15115e-05	65		70		75		80		85		90		95	2.38929e-05	100	2.23323e-05	105	2.74078e-05	110	0.000266571	115	3.87556e-05	120	1.5076e-05	125
	5		10		15		20		25		30		35	5.11456e-05	40	2.47208e-05	45	3.38013e-05	50	1.69811e-05	55	3.02317e-05	60	4.62074e-05	65		70		75		80		85		90		95	2.62521e-05	100	2.71311e-05	105	1.95057e-05	110	3.96247e-05	115	4.58633e-05	120	1.43326e-05	125
	5		10		15		20		25		30		35	2.49885e-05	40	1.91068e-05	45	2.91519e-05	50	1.4664e-05	55	4.26489e-05	60	4.4837e-05	65		70		75		80		85		90		95	2.68395e-05	100	2.75747e-05	105	2.08506e-05	110	2.24756e-05	115	5.27307e-05	120	1.8663e-05	125
	5		10		15		20		25		30		35	2.26066e-05	40	3.51157e-05	45	2.98016e-05	50	1.58862e-05	55	2.65509e-05	60	3.27934e-05	65		70		75		80		85		90		95	2.34361e-05	100	2.82238e-05	105	3.19896e-05	110	2.55207e-05	115	3.12381e-05	120	2.08879e-05	125
	5		10		15		20		25		30		35	3.3083e-05	40	3.57803e-05	45	2.87275e-05	50	1.69992e-05	55	2.70462e-05	60	4.9081e-05	65		70		75		80		85		90		95	6.78952e-05	100	2.19633e-05	105	3.44166e-05	110	2.27581e-05	115	5.47825e-05	120	1.54917e-05	125
	5		10		15		20		25		30		35	3.29925e-05	40	2.416e-05	45	3.018e-05	50	1.93318e-05	55	3.35863e-05	60	5.37516e-05	65		70		75		80		85		90		95	3.08589e-05	100	1.67614e-05	105	3.1974e-05	110	2.63744e-05	115	3.81029e-05	120	1.52663e-05	125
	5		10		15		20		25		30		35	2.57639e-05	40	2.50855e-05	45	2.74936e-05	50	1.68694e-05	55	3.51895e-05	60	2.78851e-05	65		70		75		80		85		90		95	2.14112e-05	100	2.74095e-05	105	2.47533e-05	110	2.51072e-05	115	3.00619e-05	120	1.86141e-05	125
	5		10		15		20		25		30		35	2.10422e-05	40	2.22727e-05	45	6.0996e-05	50	1.51097e-05	55	2.65936e-05	60	2.97945e-05	65		70		75		80		85		90		95	3.0962e-05	100	1.6577e-05	105	2.27462e-05	110	2.63052e-05	115	4.22788e-05	120	1.88197e-05	125
	5		10		15		20		25		30		35	2.02515e-05	40	1.90451e-05	45	4.39933e-05	50	1.60168e-05	55	2.83368e-05	60	3.65896e-05	65		70		75		80		85		90		95	2.34966e-05	100	2.29931e-05	105	0.000112083	110	3.22975e-05	115	3.22988e-05	120	1.35072e-05	125
	5		10		15		20		25		30		35	2.24377e-05	40	3.09323e-05	45	2.67898e-05	50	0.000127181	55	3.39945e-05	60	3.80577e-05	65		70		75		80		85		90		95	2.59995e-05	100	2.556e-05	105	2.27494e-05	110	1.98909e-05	115	3.64295e-05	120	1.73803e-05	125
	5		10		15		20		25		30		35	4.12204e-05	40	3.88643e-05	45	3.23633e-05	50	1.4896e-05	55	2.7813e-05	60	5.10655e-05	65		70		75		80		85		90		95	2.61236e-05	100	2.30563e-05	105	0.000150911	110	1.23646e-05	115	3.03436e-05	120	1.5547e-05	125
	5		10		15		20		25		30		35	0.000510242	40	2.96495e-05	45	3.58861e-05	50	1.60832e-05	55	2.79285e-05	60	5.77039e-05	65		70		75		80		85		90		95	2.0926e-05	100	2.46422e-05	105	1.99523e-05	110	2.36189e-05	115	3.59511e-05	120	1.62816e-05	125
	5		10		15		20		25		30		35	4.06908e-05	40	3.47038e-05	45	2.88109e-05	50	3.05378e-05	55	2.92475e-05	60	2.52436e-05	65		70		75		80		85		90		95	2.21175e-05	100	1.73164e-05	105	0.000101988	110	1.72927e-05	115	3.38275e-05	120	1.44206e-05	125
	5		10		15		20		25		30		35	0.000257517	40	3.35064e-05	45	2.80492e-05	50	1.43724e-05	55	3.01628e-05	60	4.49893e-05	65		70		75		80		85		90		95	6.11637e-05	100	1.69135e-05	105	2.17456e-05	110	2.36763e-05	115	3.5247e-05	120	1.38478e-05	125
	5		10		15		20		25		30		35	0.000138132	40	2.31686e-05	45	7.01696e-05	50	2.10192e-05	55	3.49487e-05	60	4.07027e-05	65		70		75		80		85		90		95	8.7235e-05	100	2.4994e-05	105	4.46722e-05	110	1.31675e-05	115	3.05778e-05	120	2.15622e-05	125
	5		10		15		20		25		30		35	4.06715e-05	40	2.34081e-05	45	4.89335e-05	50	1.81008e-05	55	3.64994e-05	60	4.13349e-05	65		70		75		80		85		90		95	9.3097e-05	100	2.46582e-05	105	2.88877e-05	110	3.48563e-05	115	4.8263e-05	120	1.59872e-05	125
	5		10		15		20		25		30		35	3.93581e-05	40	2.30607e-05	45	6.48769e-05	50	1.62688e-05	55	2.9849e-05	60	3.08443e-05	65		70		75		80		85		90		95	5.3854e-05	100	2.8836e-05	105	0.0001144	110	2.44205e-05	115	4.4127e-05	120	3.15681e-05	125
	5		10		15		20		25		30		35	2.02197e-05	40	2.18278e-05	45	3.6027e-05	50	1.8999e-05	55	3.58165e-05	60	9.32257e-05	65		70		75		80		85		90		95	2.15472e-05	100	4.41713e-05	105	1.9517e-05	110	1.26629e-05	115	0.000210201	120	3.32516e-05	125
	5		10		15		20		25		30		35	2.01537e-05	40	2.19639e-05	45	5.15235e-05	50	1.34079e-05	55	3.04332e-05	60	3.80312e-05	65		70		75		80		85		90		95	2.82579e-05	100	2.89793e-05	105	2.70826e-05	110	6.53428e-05	115	3.58688e-05	120	4.2081e-05	125
	5		10		15		20		25		30		35	8.49536e-05	40	1.9354e-05	45	6.39143e-05	50	1.30858e-05	55	3.01249e-05	60	5.2166e-05	65		70		75		80		85		90		95	2.75053e-05	100	1.66521e-05	105	2.42205e-05	110	4.04713e-05	115	4.27978e-05	120	3.51128e-05	125
	5		10		15		20		25		30		35	2.31134e-05	40	3.81485e-05	45	3.53744e-05	50	3.92667e-05	55	3.13308e-05	60	3.56737e-05	65		70		75		80		85		90		95	8.94334e-05	100	2.26634e-05	105	1.96317e-05	110	2.89039e-05	115	4.54511e-05	120	2.57932e-05	125
	5		10		15		20		25		30		35	4.48702e-05	40	2.19465e-05	45	2.98242e-05	50	1.88553e-05	55	4.75482e-05	60	3.89981e-05	65		70		75		80		85		90		95	9.23768e-05	100	2.41439e-05	105	2.35517e-05	110	2.78728e-05	115	3.56208e-05	120	1.75544e-05	125
	5		10		15		20		25		30		35	2.33463e-05	40	4.53013e-05	45	4.34289e-05	50	1.44928e-05	55	6.10611e-05	60	2.80895e-05	65		70		75		80		85		90		95	2.38616e-05	100	2.23449e-05	105	2.30732e-05	110	3.7815e-05	115	4.33781e-05	120	1.78124e-05	125
	5		10		15		20		25		30		35	2.85124e-05	40	3.58825e-05	45	3.51127e-05	50	1.63713e-05	55	3.68476e-05	60	3.32937e-05	65		70		75		80		85		90		95	2.48977e-05	100	2.12616e-05	105	0.000237507	110	2.75453e-05	115	3.7603e-05	120	1.39497e-05	125
	5		10		15		20		25		30		35	2.56516e-05	40	9.23904e-05	45	3.31985e-05	50	1.46494e-05	55	2.8507e-05	60	3.73775e-05	65		70		75		80		85		90		95	2.77435e-05	100	2.76428e-05	105	2.06406e-05	110	1.89078e-05	115	3.45473e-05	120	3.94778e-05	125
	5		10		15		20		25		30		35	4.89191e-05	40	2.50091e-05	45	4.04197e-05	50	1.55857e-05	55	4.14692e-05	60	2.74574e-05	65		70		75		80		85		90		95	2.57443e-05	100	3.25221e-05	105	2.49295e-05	110	0.000183211	115	3.60345e-05	120	1.79282e-05	125
	5		10		15		20		25		30		35	2.24466e-05	40	7.34206e-05	45	3.09628e-05	50	1.96316e-05	55	3.42253e-05	60	2.58182e-05	65		70		75		80		85		90		95	2.3477e-05	100	1.66067e-05	105	3.39927e-05	110	4.84322e-05	115	3.93349e-05	120	1.77604e-05	125
	5		10		15		20		25		30		35	2.8353e-05	40	2.24117e-05	45	4.18047e-05	50	0.0001041	55	3.43585e-05	60	3.07559e-05	65		70		75		80		85		90		95	3.25671e-05	100	2.42048e-05	105	6.49471e-05	110	2.96704e-05	115	3.32618e-05	120	1.36936e-05	125
	5		10		15		20		25		30		35	9.32021e-05	40	5.31443e-05	45	3.97914e-05	50	1.55322e-05	55	7.49631e-05	60	3.25387e-05	65		70		75		80		85		90		95	3.40621e-05	100	1.90006e-05	105	6.19035e-05	110	3.82374e-05	115	3.32085e-05	120	1.87749e-05	125
	5		10		15		20		25		30		35	2.07887e-05	40	2.55751e-05	45	2.76559e-05	50	2.18379e-05	55	4.17939e-05	60	3.5989e-05	65		70		75		80		85		90		95	2.0608e-05	100	4.91563e-05	105	2.24751e-05	110	1.84536e-05	115	3.35253e-05	120	2.14899e-05	125
	5		10		15		20		25		30		35	2.1536e-05	40	2.58066e-05	45	2.67362e-05	50	1.58792e-05	55	3.67081e-05	60	4.21031e-05	65		70		75		80		85		90		95	2.71912e-05	100	2.2352e-05	105	2.79951e-05	110	1.93439e-05	115	3.17599e-05	120	1.42432e-05	125
	5		10		15		20		25		30		35	9.23552e-05	40	4.53096e-05	45	0.000677728	50	1.70253e-05	55	3.24598e-05	60	9.38336e-05	65		70		75		80		85		90		95	2.13787e-05	100	2.8217e-05	105	2.85034e-05	110	1.6283e-05	115	0.000110916	120	1.39119e-05	125
	5		10		15		20		25		30		35	0.000162697	40	3.33078e-05	45	5.44768e-05	50	3.40633e-05	55	7.72366e-05	60	3.91797e-05	65		70		75		80		85		90		95	2.61145e-05	100	2.13915e-05	105	1.95581e-05	110	1.76351e-05	115	3.70264e-05	120	1.92636e-05	125
	5		10		15		20		25		30		35	2.33068e-05	40	8.87896e-05	45	4.12281e-05	50	1.50112e-05	55	7.45548e-05	60	3.90862e-05	65		70		75		80		85		90		95	4.34414e-05	100	2.43412e-05	105	2.01599e-05	110	6.97391e-05	115	6.93796e-05	120	1.3585e-05	125
	5		10		15		20		25		30		35	2.36683e-05	40	2.44963e-05	45	3.17512e-05	50	1.37519e-05	55	2.80875e-05	60	3.20558e-05	65		70		75		80		85		90		95	2.70063e-05	100	3.49765e-05	105	2.01752e-05	110	1.79986e-05	115	3.65267e-05	120	2.06931e-05	125
	5		10		15		20		25		30		35	2.05596e-05	40	3.86475e-05	45	3.23863e-05	50	3.33269e-05	55	2.88905e-05	60	2.71674e-05	65		70		75		80		85		90		95	2.14974e-05	100	1.71766e-05	105	2.12335e-05	110	5.05731e-05	115	3.16092e-05	120	1.67252e-05	125
	5		10		15		20		25		30		35	3.66831e-05	40	4.89442e-05	45	4.38582e-05	50	1.67632e-05	55	3.27383e-05	60	4.19659e-05	65		70		75		80		85		90		95	2.47468e-05	100	2.015e-05	105	2.58223e-05	110	5.29575e-05	115	3.52821e-05	120	1.57942e-05	125
	5		10		15		20		25		30		35	2.89034e-05	40	2.59648e-05	45	3.97957e-05	50	1.42657e-05	55	4.27442e-05	60	2.71286e-05	65		70		75		80		85		90		95	3.0869e-05	100	1.74109e-05	105	7.15506e-05	110	0.000349789	115	5.02387e-05	120	2.43501e-05	125
	5		10		15		20		25		30		35	2.65469e-05	40	4.72185e-05	45	3.67018e-05	50	1.50299e-05	55	3.25516e-05	60	3.63146e-05	65		70		75		80		85		90		95	2.94041e-05	100	1.75166e-05	105	6.01055e-05	110	2.52648e-05	115	3.2319e-05	120	1.75404e-05	125
	5		10		15		20		25		30		35	0.000442516	40	2.78564e-05	45	3.94905e-05	50	1.4679e-05	55	3.06749e-05	60	3.25335e-05	65		70		75		80		85		90		95	5.0179e-05	100	2.75917e-05	105	4.41486e-05	110	1.27551e-05	115	5.11119e-05	120	9.72891e-05	125
	5		10		15		20		25		30		35	4.58946e-05	40	2.65018e-05	45	2.68293e-05	50	1.75658e-05	55	4.15638e-05	60	6.58275e-05	65		70		75		80		85		90		95	3.38947e-05	100	2.83926e-05	105	5.83671e-05	110	1.70624e-05	115	5.04448e-05	120	0.000104147	125
	5		10		15		20		25		30		35	2.53658e-05	40	5.88308e-05	45	2.77815e-05	50	2.08367e-05	55	3.71019e-05	60	2.9168e-05	65		70		75		80		85		90		95	2.66715e-05	100	2.80213e-05	105	4.7476e-05	110	1.229e-05	115	3.52599e-05	120	1.43502e-05	125
	5		10		15		20		25		30		35	5.40563e-05	40	2.34106e-05	45	2.81242e-05	50	1.3328e-05	55	3.10088e-05	60	3.76457e-05	65		70		75		80		85		90		95	3.59865e-05	100	2.11723e-05	105	3.06484e-05	110	3.44854e-05	115	0.000102068	120	1.76513e-05	125
	5		10		15		20		25		30		35	2.1441e-05	40	2.9215e-05	45	3.40597e-05	50	1.39092e-05	55	3.86335e-05	60	4.10585e-05	65		70		75		80		85		90		95	0.000155487	100	3.02304e-05	105	2.73429e-05	110	2.95516e-05	115	5.77109e-05	120	1.65233e-05	125
	5		10		15		20		25		30		35	0.000103621	40	2.49811e-05	45	4.14852e-05	50	2.23297e-05	55	2.81444e-05	60	2.50275e-05	65		70		75		80		85		90		95	4.21152e-05	100	3.0863e-05	105	9.12978e-05	110	1.37947e-05	115	0.000355956	120	1.40319e-05	125
	5		10		15		20		25		30		35	0.000262798	40	4.608e-05	45	2.71088e-05	50	1.56327e-05	55	2.94267e-05	60	5.12905e-05	65		70		75		80		85		90		95	4.15849e-05	100	2.19556e-05	105	2.39389e-05	110	4.43482e-05	115	3.16262e-05	120	1.75798e-05	125
	5		10		15		20		25		30		35	2.37175e-05	40	2.53033e-05	45	3.86177e-05	50	1.48982e-05	55	4.76435e-05	60	3.84948e-05	65		70		75		80		85		90		95	2.25885e-05	100	2.4399e-05	105	3.20804e-05	110	2.63185e-05	115	3.08416e-05	120	1.71464e-05	125
	5		10		15		20		25		30		35	2.28611e-05	40	2.99803e-05	45	3.44935e-05	50	1.56386e-05	55	4.37925e-05	60	5.80744e-05	65		70		75		80		85		90		95	2.47637e-05	100	3.05037e-05	105	1.99265e-05	110	1.964e-05	115	8.34707e-05	120	1.41339e-05	125
	5		10		15		20		25		30		35	9.04298e-05	40	4.31416e-05	45	2.8126e-05	50	1.55415e-05	55	3.55928e-05	60	2.70839e-05	65		70		75		80		85		90		95	8.04982e-05	100	2.5866e-05	105	9.53526e-05	110	2.98624e-05	115	5.52603e-05	120	1.68368e-05	125
	5		10		15		20		25		30		35	0.000104104	40	1.89389e-05	45	2.73559e-05	50	1.31042e-05	55	2.71356e-05	60	2.84913e-05	65		70		75		80		85		90		95	2.16804e-05	100	5.22144e-05	105	2.16047e-05	110	1.74785e-05	115	4.59108e-05	120	1.39912e-05	125
	5		10		15		20		25		30		35	3.0191e-05	40	1.8623e-05	45	0.000153395	50	1.89004e-05	55	5.5575e-05	60	3.20407e-05	65		70		75		80		85		90		95	2.39597e-05	100	1.88034e-05	105	1.96418e-05	110	8.47441e-05	115	3.63885e-05	120	1.60217e-05	125
	5		10		15		20		25		30		35	5.9945e-05	40	3.08322e-05	45	0.000111557	50	1.33198e-05	55	4.73577e-05	60	2.55429e-05	65		70		75		80		85		90		95	2.72478e-05	100	1.89995e-05	105	3.72786e-05	110	2.44422e-05	115	4.57391e-05	120	1.96825e-05	125
	5		10		15		20		25		30		35	7.48905e-05	40	9.70688e-05	45	4.69042e-05	50	1.52115e-05	55	3.1646e-05	60	3.6813e-05	65		70		75		80		85		90		95	2.18432e-05	100	2.51367e-05	105	6.75348e-05	110	1.68594e-05	115	3.53177e-05	120	1.41036e-05	125
	5		10		15		20		25		30		35	2.24087e-05	40	3.08333e-05	45	7.77029e-05	50	1.4624e-05	55	2.77029e-05	60	2.62408e-05	65		70		75		80		85		90		95	2.33613e-05	100	4.07816e-05	105	2.65361e-05	110	5.06292e-05	115	4.06866e-05	120	1.73825e-05	125
	5		10		15		20		25		30		35	0.000110043	40	2.14165e-05	45	0.000113618	50	1.42708e-05	55	2.73463e-05	60	3.88688e-05	65		70		75		80		85		90		95	2.44234e-05	100	5.44961e-05	105	2.12814e-05	110	0.000167906	115	3.74428e-05	120	1.45878e-05	125
	5		10		15		20		25		30		35	4.57369e-05	40	4.53078e-05	45	0.000146695	50	1.58597e-05	55	3.32956e-05	60	3.75492e-05	65		70		75		80		85		90		95	5.12318e-05	100	2.23377e-05	105	2.21428e-05	110	4.32658e-05	115	3.87799e-05	120	4.22756e-05	125
	5		10		15		20		25		30		35	2.71202e-05	40	0.000103217	45	0.000117338	50	1.39224e-05	55	3.89743e-05	60	4.25121e-05	65		70		75		80		85		90		95	2.82109e-05	100	3.42678e-05	105	2.97844e-05	110	2.9946e-05	115	3.95644e-05	120	1.49642e-05	125
	5		10		15		20		25		30		35	2.53352e-05	40	2.09433e-05	45	9.86342e-05	50	1.59428e-05	55	3.09931e-05	60	3.44494e-05	65		70		75		80		85		90		95	4.55407e-05	100	1.76413e-05	105	4.04732e-05	110	1.76425e-05	115	3.53744e-05	120	3.66655e-05	125
	5		10		15		20		25		30		35	2.46161e-05	40	2.48709e-05	45	6.90929e-05	50	1.39642e-05	55	3.76198e-05	60	3.22504e-05	65		70		75		80		85		90		95	2.49568e-05	100	1.71868e-05	105	4.80566e-05	110	1.61947e-05	115	4.15666e-05	120	4.31516e-05	125
	5		10		15		20		25		30		35	2.40138e-05	40	6.16165e-05	45	7.46231e-05	50	1.44003e-05	55	3.49563e-05	60	2.70455e-05	65		70		75		80		85		90		95	2.26153e-05	100	1.91579e-05	105	2.49939e-05	110	4.55366e-05	115	3.00977e-05	120	1.65905e-05	125
	5		10		15		20		25		30		35	2.50659e-05	40	4.95932e-05	45	8.33004e-05	50	1.47253e-05	55	5.02834e-05	60	4.90993e-05	65		70		75		80		85		90		95	3.44727e-05	100	1.76893e-05	105	2.14667e-05	110	2.22965e-05	115	3.76913e-05	120	2.2544e-05	125
	5		10		15		20		25		30		35	2.1436e-05	40	2.55526e-05	45	6.16901e-05	50	1.58917e-05	55	6.82661e-05	60	2.93341e-05	65		70		75		80		85		90		95	4.88827e-05	100	1.86682e-05	105	2.76059e-05	110	4.07738e-05	115	3.80985e-05	120	1.62871e-05	125
	5		10		15		20		25		30		35	2.9303e-05	40	2.17621e-05	45	7.33249e-05	50	1.94275e-05	55	3.34664e-05	60	3.13844e-05	65		70		75		80		85		90		95	3.81828e-05	100	1.88097e-05	105	2.52381e-05	110	4.15994e-05	115	3.10582e-05	120	1.67961e-05	125
	5		10		15		20		25		30		35	3.17092e-05	40	1.88284e-05	45	9.6519e-05	50	3.6164e-05	55	5.60323e-05	60	3.76349e-05	65		70		75		80		85		90		95	2.11522e-05	100	2.09482e-05	105	2.59618e-05	110	3.23338e-05	115	3.06589e-05	120	1.64398e-05	125
	5		10		15		20		25		30		35	3.18686e-05	40	2.25997e-05	45	4.27075e-05	50	1.74993e-05	55	6.02822e-05	60	5.14408e-05	65		70		75		80		85		90		95	3.72551e-05	100	4.57028e-05	105	2.18383e-05	110	3.08733e-05	115	3.27747e-05	120	2.07479e-05	125
	5		10		15		20		25		30		35	3.10025e-05	40	2.05716e-05	45	3.12975e-05	50	1.45535e-05	55	3.67945e-05	60	3.62116e-05	65		70		75		80		85		90		95	3.85204e-05	100	2.08203e-05	105	2.16382e-05	110	0.000124986	115	3.89682e-05	120	1.85225e-05	125
	5		10		15		20		25		30		35	5.40431e-05	40	2.18239e-05	45	0.00011424	50	1.57518e-05	55	3.96315e-05	60	4.10959e-05	65		70		75		80		85		90		95	0.000329788	100	1.72032e-05	105	6.37053e-05	110	3.57834e-05	115	2.95438e-05	120	1.96381e-05	125
	5		10		15		20		25		30		35	3.93151e-05	40	3.21556e-05	45	7.77181e-05	50	1.3898e-05	55	3.4652e-05	60	2.59084e-05	65		70		75		80		85		90		95	2.71128e-05	100	5.21158e-05	105	9.02562e-05	110	1.57168e-05	115	3.39136e-05	120	1.55381e-05	125
	5		10		15		20		25		30		35	2.16156e-05	40	2.61193e-05	45	9.94123e-05	50	1.34024e-05	55	3.49053e-05	60	3.93622e-05	65		70		75		80		85		90		95	3.25575e-05	100	3.58618e-05	105	0.000160768	110	2.97782e-05	115	3.96566e-05	120	1.35921e-05	125
	5		10		15		20		25		30		35	2.4427e-05	40	2.37478e-05	45	3.93685e-05	50	1.81784e-05	55	3.91039e-05	60	3.39548e-05	65		70		75		80		85		90		95	7.5018e-05	100	2.35087e-05	105	0.00126915	110	0.000143188	115	4.78413e-05	120	1.39839e-05	125
	5		10		15		20		25		30		35	2.20023e-05	40	4.76808e-05	45	3.20194e-05	50	2.06063e-05	55	2.82217e-05	60	3.01645e-05	65		70		75		80		85		90		95	6.56168e-05	100	2.13514e-05	105	9.71778e-05	110	4.83041e-05	115	2.98544e-05	120	1.44905e-05	125
	5		10		15		20		25		30		35	4.17523e-05	40	5.21242e-05	45	2.78185e-05	50	1.67228e-05	55	3.05771e-05	60	6.94841e-05	65		70		75		80		85		90		95	6.61201e-05	100	1.69759e-05	105	8.02527e-05	110	1.43385e-05	115	3.09519e-05	120	1.43706e-05	125
	5		10		15		20		25		30		35	3.12064e-05	40	1.93011e-05	45	2.78156e-05	50	1.485e-05	55	2.76007e-05	60	3.34397e-05	65		70		75		80		85		90		95	2.72969e-05	100	5.99133e-05	105	7.89031e-05	110	5.28796e-05	115	3.66579e-05	120	1.4654e-05	125
	5		10		15		20		25		30		35	2.01408e-05	40	2.67238e-05	45	3.169e-05	50	1.35076e-05	55	2.89109e-05	60	4.45226e-05	65		70		75		80		85		90		95	3.21086e-05	100	2.66577e-05	105	0.000203263	110	7.78783e-05	115	8.12615e-05	120	1.39609e-05	125
	5		10		15		20		25		30		35	3.6878e-05	40	2.19962e-05	45	3.9165e-05	50	2.22449e-05	55	2.73432e-05	60	5.23726e-05	65		70		75		80		85		90		95	6.04123e-05	100	1.84829e-05	105	6.84642e-05	110	0.000141211	115	3.77436e-05	120	0.000193802	125
	5		10		15		20		25		30		35	2.50217e-05	40	1.8353e-05	45	2.7295e-05	50	2.67221e-05	55	2.7862e-05	60	4.03721e-05	65		70		75		80		85		90		95	2.11079e-05	100	1.6968e-05	105	6.59447e-05	110	3.90751e-05	115	3.08386e-05	120	1.47411e-05	125
	5		10		15		20		25		30		35	3.30974e-05	40	4.37915e-05	45	4.14477e-05	50	1.44304e-05	55	3.02452e-05	60	5.6353e-05	65		70		75		80		85		90		95	6.97407e-05	100	1.87335e-05	105	2.07033e-05	110	2.68985e-05	115	3.33063e-05	120	1.4363e-05	125
	5		10		15		20		25		30		35	3.98982e-05	40	2.41235e-05	45	2.70811e-05	50	1.53913e-05	55	5.1389e-05	60	2.8735e-05	65		70		75		80		85		90		95	2.06694e-05	100	1.98424e-05	105	0.000277637	110	2.9408e-05	115	5.83746e-05	120	1.65391e-05	125
	5		10		15		20		25		30		35	3.89965e-05	40	4.50087e-05	45	2.76962e-05	50	1.39736e-05	55	2.65511e-05	60	0.0002491	65		70		75		80		85		90		95	3.38744e-05	100	2.2203e-05	105	2.37377e-05	110	1.2029e-05	115	3.95208e-05	120	1.35017e-05	125
	5		10		15		20		25		30		35	2.06092e-05	40	2.26109e-05	45	4.2309e-05	50	1.47687e-05	55	3.17177e-05	60	5.55105e-05	65		70		75		80		85		90		95	3.10175e-05	100	2.23623e-05	105	4.19537e-05	110	3.2569e-05	115	3.46584e-05	120	0.000565302	125
	5		10		15		20		25		30		35	2.01706e-05	40	6.37906e-05	45	4.02605e-05	50	1.69659e-05	55	4.45608e-05	60	3.01222e-05	65		70		75		80		85		90		95	2.81808e-05	100	2.26632e-05	105	4.59333e-05	110	2.40796e-05	115	2.99889e-05	120	1.50709e-05	125
	5		10		15		20		25		30		35	5.87984e-05	40	2.12085e-05	45	3.95187e-05	50	1.34265e-05	55	3.96201e-05	60	2.56173e-05	65		70		75		80		85		90		95	3.1035e-05	100	1.77359e-05	105	2.04898e-05	110	4.21456e-05	115	2.98071e-05	120	1.48701e-05	125
	5		10		15		20		25		30		35	2.09065e-05	40	3.53627e-05	45	6.14813e-05	50	1.77936e-05	55	3.01506e-05	60	3.81738e-05	65		70		75		80		85		90		95	2.44192e-05	100	2.17784e-05	105	0.000113885	110	1.84743e-05	115	4.85455e-05	120	1.54229e-05	125
	5		10		15		20		25		30		35	5.12128e-05	40	2.18352e-05	45	0.000106608	50	1.30163e-05	55	3.20923e-05	60	2.9127e-05	65		70		75		80		85		90		95	4.57401e-05	100	1.82951e-05	105	1.97445e-05	110	1.61549e-05	115	4.99147e-05	120	1.55043e-05	125
	5		10		15		20		25		30		35	2.10087e-05	40	5.21067e-05	45	2.85199e-05	50	1.41374e-05	55	6.47884e-05	60	2.64892e-05	65		70		75		80		85		90		95	2.76302e-05	100	3.38806e-05	105	3.99148e-05	110	1.37332e-05	115	3.33266e-05	120	1.82196e-05	125
	5		10		15		20		25		30		35	3.6694e-05	40	3.10414e-05	45	3.40666e-05	50	2.49008e-05	55	3.34239e-05	60	5.8869e-05	65		70		75		80		85		90		95	2.15469e-05	100	2.21633e-05	105	4.39327e-05	110	2.61066e-05	115	3.24534e-05	120	1.62741e-05	125
	5		10		15		20		25		30		35	2.84676e-05	40	2.26332e-05	45	4.40528e-05	50	2.42977e-05	55	3.42827e-05	60	4.49396e-05	65		70		75		80		85		90		95	3.23421e-05	100	1.83877e-05	105	1.98363e-05	110	1.53581e-05	115	3.62558e-05	120	1.51077e-05	125
	5		10		15		20		25		30		35	2.15138e-05	40	1.96794e-05	45	3.32956e-05	50	1.52025e-05	55	3.45871e-05	60	3.05725e-05	65		70		75		80		85		90		95	2.94619e-05	100	2.78506e-05	105	2.5858e-05	110	1.41049e-05	115	5.22325e-05	120	2.09718e-05	125
	5		10		15		20		25		30		35	3.82875e-05	40	2.08548e-05	45	3.13996e-05	50	1.40805e-05	55	3.73351e-05	60	2.63067e-05	65		70		75		80		85		90		95	2.37361e-05	100	2.76107e-05	105	2.71212e-05	110	1.66504e-05	115	4.53431e-05	120	1.81106e-05	125
	5		10		15		20		25		30		35	2.07834e-05	40	2.13718e-05	45	2.80348e-05	50	1.46436e-05	55	6.48064e-05	60	6.74316e-05	65		70		75		80		85		90		95	3.50552e-05	100	2.47908e-05	105	1.9722e-05	110	1.25456e-05	115	3.7315e-05	120	1.76506e-05	125
	5		10		15		20		25		30		35	3.7253e-05	40	7.90387e-05	45	3.74684e-05	50	1.66826e-05	55	0.00011751	60	6.20161e-05	65		70		75		80		85		90		95	2.61832e-05	100	2.14998e-05	105	2.64551e-05	110	1.94282e-05	115	4.21616e-05	120	1.43674e-05	125
	5		10		15		20		25		30		35	2.40012e-05	40	6.22309e-05	45	5.23954e-05	50	1.5509e-05	55	2.74755e-05	60	2.85057e-05	65		70		75		80		85		90		95	2.30806e-05	100	2.40399e-05	105	2.16664e-05	110	1.37347e-05	115	3.49954e-05	120	9.4979e-05	125
	5		10		15		20		25		30		35	2.26679e-05	40	4.02278e-05	45	5.30409e-05	50	1.73855e-05	55	4.08799e-05	60	3.152e-05	65		70		75		80		85		90		95	4.6679e-05	100	1.74913e-05	105	2.2198e-05	110	1.3552e-05	115	3.32578e-05	120	8.93989e-05	125
	5		10		15		20		25		30		35	6.51839e-05	40	2.00875e-05	45	3.39878e-05	50	2.29518e-05	55	3.7074e-05	60	3.30719e-05	65		70		75		80		85		90		95	3.63073e-05	100	3.11752e-05	105	2.07908e-05	110	4.56385e-05	115	3.53817e-05	120	1.3852e-05	125
	5		10		15		20		25		30		35	7.21821e-05	40	4.31693e-05	45	3.26057e-05	50	2.07489e-05	55	2.92621e-05	60	4.08384e-05	65		70		75		80		85		90		95	2.09091e-05	100	1.73692e-05	105	0.000285684	110	1.77781e-05	115	3.68427e-05	120	1.4803e-05	125
	5		10		15		20		25		30		35	6.62638e-05	40	3.44701e-05	45	3.03121e-05	50	1.35834e-05	55	3.43731e-05	60	3.25328e-05	65		70		75		80		85		90		95	2.23535e-05	100	1.90839e-05	105	2.02294e-05	110	2.67935e-05	115	3.05476e-05	120	1.61705e-05	125
	5		10		15		20		25		30		35	3.61027e-05	40	2.83304e-05	45	3.05365e-05	50	1.70253e-05	55	2.97877e-05	60	2.73195e-05	65		70		75		80		85		90		95	2.10159e-05	100	2.91815e-05	105	1.99477e-05	110	3.46386e-05	115	3.89155e-05	120	1.85231e-05	125
	5		10		15		20		25		30		35	9.76132e-05	40	1.88812e-05	45	3.31613e-05	50	1.52952e-05	55	3.39214e-05	60	2.86093e-05	65		70		75		80		85		90		95	2.60256e-05	100	1.86333e-05	105	2.52533e-05	110	1.61399e-05	115	3.95926e-05	120	1.58961e-05	125
	5		10		15		20		25		30		35	0.000213967	40	4.12305e-05	45	5.30885e-05	50	1.68406e-05	55	3.05612e-05	60	3.53127e-05	65		70		75		80		85		90		95	2.15728e-05	100	1.93752e-05	105	1.99226e-05	110	1.85539e-05	115	5.12454e-05	120	2.25339e-05	125
	5		10		15		20		25		30		35	2.18427e-05	40	6.86061e-05	45	4.33982e-05	50	1.63352e-05	55	2.79367e-05	60	2.53029e-05	65		70		75		80		85		90		95	2.58845e-05	100	5.51569e-05	105	2.71556e-05	110	1.34086e-05	115	4.1885e-05	120	1.48242e-05	125
	5		10		15		20		25		30		35	2.88741e-05	40	4.39283e-05	45	3.26672e-05	50	1.48204e-05	55	2.65876e-05	60	6.80029e-05	65		70		75		80		85		90		95	3.77219e-05	100	2.62204e-05	105	0.000206021	110	1.77054e-05	115	3.43842e-05	120	1.47765e-05	125
	5		10		15		20		25		30		35	2.64447e-05	40	2.71426e-05	45	2.8134e-05	50	1.35441e-05	55	7.64456e-05	60	2.65008e-05	65		70		75		80		85		90		95	2.50409e-05	100	2.90848e-05	105	0.00018414	110	1.8817e-05	115	5.42283e-05	120	1.36084e-05	125
	5		10		15		20		25		30		35	0.000134004	40	4.13376e-05	45	2.78224e-05	50	1.30623e-05	55	3.48152e-05	60	3.24114e-05	65		70		75		80		85		90		95	6.56803e-05	100	2.70299e-05	105	2.17871e-05	110	2.72301e-05	115	4.24351e-05	120	1.83636e-05	125
	5		10		15		20		25		30		35	6.60726e-05	40	2.55655e-05	45	3.57079e-05	50	1.7325e-05	55	4.75919e-05	60	2.79045e-05	65		70		75		80		85		90		95	2.08019e-05	100	3.43882e-05	105	1.99152e-05	110	1.20112e-05	115	3.58525e-05	120	1.4367e-05	125
	5		10		15		20		25		30		35	2.18254e-05	40	2.20471e-05	45	2.91317e-05	50	2.23018e-05	55	3.33813e-05	60	2.52915e-05	65		70		75		80		85		90		95	2.40336e-05	100	1.97351e-05	105	2.2891e-05	110	2.03489e-05	115	4.03464e-05	120	1.38621e-05	125
	5		10		15		20		25		30		35	2.74009e-05	40	2.21441e-05	45	2.75442e-05	50	9.67208e-05	55	5.32614e-05	60	2.66696e-05	65		70		75		80		85		90		95	3.279e-05	100	1.83976e-05	105	2.31692e-05	110	2.21071e-05	115	4.03937e-05	120	1.70098e-05	125
	5		10		15		20		25		30		35	2.01537e-05	40	2.4735e-05	45	2.72899e-05	50	2.33165e-05	55	4.75561e-05	60	5.82147e-05	65		70		75		80		85		90		95	2.1781e-05	100	6.2292e-05	105	0.000141457	110	1.81326e-05	115	3.56728e-05	120	2.0064e-05	125
	5		10		15		20		25		30		35	2.81129e-05	40	2.86066e-05	45	3.32282e-05	50	1.72236e-05	55	3.94442e-05	60	5.92681e-05	65		70		75		80		85		90		95	2.18422e-05	100	2.59456e-05	105	2.25854e-05	110	1.20556e-05	115	2.99535e-05	120	1.37879e-05	125
	5		10		15		20		25		30		35	2.18978e-05	40	2.38809e-05	45	8.50538e-05	50	1.80529e-05	55	3.44518e-05	60	2.64225e-05	65		70		75		80		85		90		95	2.39783e-05	100	3.01413e-05	105	1.97066e-05	110	1.61127e-05	115	6.85044e-05	120	1.36709e-05	125
	5		10		15		20		25		30		35	3.38217e-05	40	3.96909e-05	45	3.92236e-05	50	1.82814e-05	55	3.21525e-05	60	4.07761e-05	65		70		75		80		85		90		95	4.14584e-05	100	2.98071e-05	105	0.00010389	110	2.86122e-05	115	3.07519e-05	120	1.35526e-05	125
	5		10		15		20		25		30		35	2.74422e-05	40	4.41314e-05	45	2.7927e-05	50	2.5179e-05	55	5.39658e-05	60	3.35186e-05	65		70		75		80		85		90		95	3.06438e-05	100	3.32693e-05	105	2.13741e-05	110	1.88643e-05	115	3.30462e-05	120	1.39857e-05	125
	5		10		15		20		25		30		35	3.00157e-05	40	7.20306e-05	45	2.93811e-05	50	1.82911e-05	55	6.05745e-05	60	2.90531e-05	65		70		75		80		85		90		95	6.49928e-05	100	3.0989e-05	105	4.62155e-05	110	4.65387e-05	115	3.35763e-05	120	1.42236e-05	125
	5		10		15		20		25		30		35	2.20044e-05	40	5.85599e-05	45	3.63674e-05	50	1.46723e-05	55	4.82146e-05	60	3.74496e-05	65		70		75		80		85		90		95	2.07029e-05	100	2.24816e-05	105	3.46775e-05	110	4.58697e-05	115	4.67795e-05	120	1.38524e-05	125
	5		10		15		20		25		30		35	3.41896e-05	40	1.91241e-05	45	4.66155e-05	50	1.35527e-05	55	3.19686e-05	60	3.27402e-05	65		70		75		80		85		90		95	2.30748e-05	100	2.10886e-05	105	2.86184e-05	110	3.2869e-05	115	3.30807e-05	120	1.50654e-05	125
	5		10		15		20		25		30		35	0.00014139	40	1.99422e-05	45	3.12794e-05	50	1.48609e-05	55	0.000168471	60	4.07222e-05	65		70		75		80		85		90		95	4.63092e-05	100	2.4212e-05	105	4.75993e-05	110	5.54752e-05	115	4.6851e-05	120	1.35479e-05	125
	5		10		15		20		25		30		35	3.43398e-05	40	3.38804e-05	45	3.16213e-05	50	1.55684e-05	55	3.38393e-05	60	3.41678e-05	65		70		75		80		85		90		95	3.77728e-05	100	1.89196e-05	105	5.16898e-05	110	2.55394e-05	115	3.09934e-05	120	1.80192e-05	125
	5		10		15		20		25		30		35	6.36301e-05	40	2.53234e-05	45	2.73339e-05	50	1.66114e-05	55	2.90008e-05	60	4.3692e-05	65		70		75		80		85		90		95	0.000241439	100	3.06813e-05	105	8.45541e-05	110	2.2931e-05	115	4.72462e-05	120	1.46131e-05	125
	5		10		15		20		25		30		35	0.000117074	40	7.50855e-05	45	5.29131e-05	50	2.25785e-05	55	9.55388e-05	60	3.02592e-05	65		70		75		80		85		90		95	2.13093e-05	100	2.03266e-05	105	7.59568e-05	110	6.38556e-05	115	5.0793e-05	120	1.95796e-05	125
	5		10		15		20		25		30		35	2.01736e-05	40	1.9476e-05	45	3.51561e-05	50	2.60589e-05	55	0.000112303	60	2.57135e-05	65		70		75		80		85		90		95	3.02678e-05	100	4.19083e-05	105	0.000204088	110	3.79094e-05	115	3.7355e-05	120	2.95822e-05	125
	5		10		15		20		25		30		35	4.67854e-05	40	3.59323e-05	45	3.27435e-05	50	1.39409e-05	55	2.65179e-05	60	3.30109e-05	65		70		75		80		85		90		95	2.4308e-05	100	2.2533e-05	105	2.05884e-05	110	3.34636e-05	115	0.000131488	120	2.89068e-05	125
	5		10		15		20		25		30		35	5.37692e-05	40	3.17102e-05	45	2.75805e-05	50	2.33462e-05	55	4.07297e-05	60	3.73795e-05	65		70		75		80		85		90		95	9.30223e-05	100	2.28924e-05	105	2.04926e-05	110	2.257e-05	115	3.7772e-05	120	2.38208e-05	125
	5		10		15		20		25		30		35	4.99181e-05	40	2.17637e-05	45	3.01601e-05	50	1.40041e-05	55	2.91337e-05	60	0.000107227	65		70		75		80		85		90		95	3.11519e-05	100	3.3393e-05	105	3.92752e-05	110	2.54503e-05	115	3.17841e-05	120	2.07842e-05	125
	5		10		15		20		25		30		35	0.00017213	40	2.72612e-05	45	3.76459e-05	50	1.44255e-05	55	3.49766e-05	60	8.30328e-05	65		70		75		80		85		90		95	2.12423e-05	100	2.27458e-05	105	2.54863e-05	110	2.574e-05	115	3.47764e-05	120	2.01274e-05	125
	5		10		15		20		25		30		35	2.29217e-05	40	2.49199e-05	45	6.40226e-05	50	1.49765e-05	55	5.87691e-05	60	6.73049e-05	65		70		75		80		85		90		95	2.33696e-05	100	1.81685e-05	105	2.01794e-05	110	1.94071e-05	115	3.66221e-05	120	1.47561e-05	125
	5		10		15		20		25		30		35	2.58522e-05	40	3.52846e-05	45	3.47778e-05	50	1.47306e-05	55	4.8547e-05	60	3.13356e-05	65		70		75		80		85		90		95	3.05928e-05	100	2.59347e-05	105	2.83214e-05	110	1.47403e-05	115	4.39484e-05	120	1.74966e-05	125
	5		10		15		20		25		30		35	5.29829e-05	40	1.96189e-05	45	2.89308e-05	50	1.40244e-05	55	3.11657e-05	60	2.70305e-05	65		70		75		80		85		90		95	2.19299e-05	100	2.25732e-05	105	4.45022e-05	110	1.97814e-05	115	6.80973e-05	120	1.93213e-05	125
	5		10		15		20		25		30		35	0.000189888	40	3.67078e-05	45	3.53454e-05	50	1.9946e-05	55	3.08764e-05	60	3.85413e-05	65		70		75		80		85		90		95	3.96882e-05	100	2.32998e-05	105	3.34442e-05	110	2.74193e-05	115	3.33959e-05	120	3.01566e-05	125
	5		10		15		20		25		30		35	6.35054e-05	40	2.67116e-05	45	2.71304e-05	50	1.7031e-05	55	2.98454e-05	60	3.95205e-05	65		70		75		80		85		90		95	4.2633e-05	100	2.02136e-05	105	2.05601e-05	110	2.32713e-05	115	3.52231e-05	120	1.57514e-05	125
	5		10		15		20		25		30		35	0.000144871	40	1.90403e-05	45	4.00448e-05	50	2.73965e-05	55	9.06882e-05	60	3.74288e-05	65		70		75		80		85		90		95	2.15945e-05	100	2.19498e-05	105	2.12057e-05	110	2.98365e-05	115	3.1555e-05	120	1.51634e-05	125
	5		10		15		20		25		30		35	2.36109e-05	40	1.89738e-05	45	3.60809e-05	50	1.57081e-05	55	3.98026e-05	60	3.28991e-05	65		70		75		80		85		90		95	2.15346e-05	100	2.0921e-05	105	2.46202e-05	110	2.19674e-05	115	4.19163e-05	120	1.8423e-05	125
	5		10		15		20		25		30		35	5.10485e-05	40	2.05019e-05	45	4.66011e-05	50	1.36519e-05	55	3.22062e-05	60	4.29528e-05	65		70		75		80		85		90		95	4.04695e-05	100	1.78772e-05	105	3.31983e-05	110	4.71089e-05	115	3.46631e-05	120	1.59974e-05	125
	5		10		15		20		25		30		35	2.22365e-05	40	4.37575e-05	45	4.99578e-05	50	1.51733e-05	55	3.62367e-05	60	2.71027e-05	65		70		75		80		85		90		95	0.000817656	100	3.69939e-05	105	4.62297e-05	110	2.94958e-05	115	3.64381e-05	120	4.54521e-05	125
	5		10		15		20		25		30		35	0.000272507	40	2.67234e-05	45	3.12466e-05	50	2.22774e-05	55	6.93809e-05	60	2.83273e-05	65		70		75		80		85		90		95	2.42978e-05	100	1.72798e-05	105	3.96783e-05	110	4.58581e-05	115	2.98403e-05	120	1.74702e-05	125
	5		10		15		20		25		30		35	0.000357707	40	2.46251e-05	45	3.22519e-05	50	2.04706e-05	55	5.77834e-05	60	4.61165e-05	65		70		75		80		85		90		95	2.59769e-05	100	0.000152185	105	0.000119103	110	3.54502e-05	115	4.84636e-05	120	1.47956e-05	125
	5		10		15		20		25		30		35	2.04791e-05	40	2.2815e-05	45	3.95588e-05	50	1.88529e-05	55	5.10736e-05	60	2.65787e-05	65		70		75		80		85		90		95	2.05578e-05	100	2.16159e-05	105	6.87213e-05	110	2.51084e-05	115	9.3402e-05	120	1.63054e-05	125
	5		10		15		20		25		30		35	2.4115e-05	40	2.64898e-05	45	3.74098e-05	50	2.07542e-05	55	3.17705e-05	60	3.05792e-05	65		70		75		80		85		90		95	2.5525e-05	100	2.02673e-05	105	7.59594e-05	110	2.9431e-05	115	3.65963e-05	120	1.73507e-05	125
	5		10		15		20		25		30		35	3.9268e-05	40	2.56058e-05	45	3.18634e-05	50	2.20521e-05	55	0.000130112	60	2.75298e-05	65		70		75		80		85		90		95	3.71528e-05	100	3.11342e-05	105	2.99574e-05	110	7.79219e-05	115	2.98661e-05	120	1.69509e-05	125
	5		10		15		20		25		30		35	8.50539e-05	40	2.34584e-05	45	2.74817e-05	50	1.52538e-05	55	2.75422e-05	60	3.14694e-05	65		70		75		80		85		90		95	2.10687e-05	100	3.82806e-05	105	2.25595e-05	110	4.86362e-05	115	5.93217e-05	120	2.16855e-05	125
	5		10		15		20		25		30		35	2.21557e-05	40	2.97603e-05	45	3.61929e-05	50	1.61349e-05	55	3.12407e-05	60	2.97129e-05	65		70		75		80		85		90		95	2.33027e-05	100	4.97594e-05	105	2.40432e-05	110	2.84172e-05	115	4.8957e-05	120	1.38704e-05	125
	5		10		15		20		25		30		35	7.7279e-05	40	6.33853e-05	45	3.71377e-05	50	1.38164e-05	55	2.99163e-05	60	2.98966e-05	65		70		75		80		85		90		95	9.48754e-05	100	2.66555e-05	105	0.000148349	110	4.5704e-05	115	4.04754e-05	120	1.69233e-05	125
	5		10		15		20		25		30		35	6.58455e-05	40	2.81349e-05	45	2.66019e-05	50	1.41659e-05	55	4.64067e-05	60	5.39451e-05	65		70		75		80		85		90		95	2.30819e-05	100	2.96667e-05	105	4.13553e-05	110	5.63083e-05	115	5.12008e-05	120	1.49475e-05	125
	5		10		15		20		25		30		35	3.50555e-05	40	2.92813e-05	45	3.25421e-05	50	2.44803e-05	55	6.02785e-05	60	3.32466e-05	65		70		75		80		85		90		95	2.14674e-05	100	2.64858e-05	105	3.19724e-05	110	5.58342e-05	115	3.3261e-05	120	1.96523e-05	125
	5		10		15		20		25		30		35	2.5922e-05	40	2.78647e-05	45	2.90016e-05	50	1.64214e-05	55	2.82547e-05	60	2.61317e-05	65		70		75		80		85		90		95	2.15489e-05	100	2.74329e-05	105	2.52103e-05	110	1.66856e-05	115	3.28289e-05	120	1.35242e-05	125
	5		10		15		20		25		30		35	7.71891e-05	40	6.39338e-05	45	9.42866e-05	50	3.40287e-05	55	5.6263e-05	60	3.90443e-05	65		70		75		80		85		90		95	3.12655e-05	100	2.1561e-05	105	2.32298e-05	110	7.84576e-05	115	8.00782e-05	120	1.46889e-05	125
	5		10		15		20		25		30		35	4.98476e-05	40	2.83655e-05	45	9.91628e-05	50	1.41836e-05	55	3.45876e-05	60	7.06324e-05	65		70		75		80		85		90		95	0.000159905	100	3.04575e-05	105	3.18841e-05	110	2.21874e-05	115	4.6587e-05	120	1.62837e-05	125
	5		10		15		20		25		30		35	0.000105696	40	3.37138e-05	45	3.88452e-05	50	2.2154e-05	55	3.18056e-05	60	2.75244e-05	65		70		75		80		85		90		95	2.25275e-05	100	2.24084e-05	105	2.14859e-05	110	5.90597e-05	115	3.84124e-05	120	1.57154e-05	125
	5		10		15		20		25		30		35	2.02367e-05	40	2.05281e-05	45	2.6608e-05	50	1.54831e-05	55	4.78179e-05	60	2.55647e-05	65		70		75		80		85		90		95	5.68283e-05	100	1.78381e-05	105	3.09537e-05	110	4.09354e-05	115	3.82538e-05	120	1.37633e-05	125
	5		10		15		20		25		30		35	4.03828e-05	40	2.55775e-05	45	2.86995e-05	50	1.33262e-05	55	3.21959e-05	60	9.85107e-05	65		70		75		80		85		90		95	2.37127e-05	100	2.10783e-05	105	3.12355e-05	110	2.72227e-05	115	0.000137911	120	1.38052e-05	125
	5		10		15		20		25		30		35	3.89915e-05	40	2.55619e-05	45	3.49619e-05	50	1.5222e-05	55	2.78367e-05	60	3.74854e-05	65		70		75		80		85		90		95	2.51447e-05	100	1.88922e-05	105	5.0896e-05	110	1.82195e-05	115	4.51414e-05	120	1.64419e-05	125
	5		10		15		20		25		30		35	2.18819e-05	40	2.40171e-05	45	3.19266e-05	50	1.50528e-05	55	3.06266e-05	60	5.97506e-05	65		70		75		80		85		90		95	2.47161e-05	100	2.42595e-05	105	8.92415e-05	110	2.91121e-05	115	3.93471e-05	120	1.42339e-05	125
	5		10		15		20		25		30		35	3.02903e-05	40	2.16889e-05	45	2.66481e-05	50	1.79863e-05	55	3.49728e-05	60	2.69401e-05	65		70		75		80		85		90		95	6.43972e-05	100	2.53635e-05	105	2.02004e-05	110	2.2601e-05	115	0.000110048	120	2.33825e-05	125
	5		10		15		20		25		30		35	2.15395e-05	40	3.36149e-05	45	2.67897e-05	50	1.3735e-05	55	3.93831e-05	60	3.34478e-05	65		70		75		80		85		90		95	6.46144e-05	100	2.27719e-05	105	2.20688e-05	110	1.82265e-05	115	4.66919e-05	120	1.54204e-05	125
	5		10		15		20		25		30		35	3.85325e-05	40	2.87843e-05	45	3.92026e-05	50	1.31586e-05	55	3.22282e-05	60	3.51627e-05	65		70		75		80		85		90		95	2.20146e-05	100	2.10945e-05	105	2.4428e-05	110	1.90736e-05	115	0.000159957	120	1.65464e-05	125
	5		10		15		20		25		30		35	3.37403e-05	40	2.57415e-05	45	4.87738e-05	50	1.92357e-05	55	3.7075e-05	60	3.0227e-05	65		70		75		80		85		90		95	3.6203e-05	100	2.58293e-05	105	2.04e-05	110	1.37066e-05	115	2.9551e-05	120	1.45035e-05	125
	5		10		15		20		25		30		35	2.42664e-05	40	4.06955e-05	45	4.11352e-05	50	1.45737e-05	55	2.77993e-05	60	3.64481e-05	65		70		75		80		85		90		95	2.20316e-05	100	2.80573e-05	105	2.28007e-05	110	1.71835e-05	115	3.11025e-05	120	1.6797e-05	125
	5		10		15		20		25		30		35	0.000124645	40	1.88269e-05	45	0.000153419	50	2.6608e-05	55	2.95904e-05	60	2.5477e-05	65		70		75		80		85		90		95	2.66097e-05	100	2.07101e-05	105	5.22074e-05	110	3.17702e-05	115	5.30893e-05	120	2.33822e-05	125
	5		10		15		20		25		30		35	4.63361e-05	40	4.15812e-05	45	3.38553e-05	50	2.25075e-05	55	5.14369e-05	60	3.44736e-05	65		70		75		80		85		90		95	2.48319e-05	100	2.99696e-05	105	5.60463e-05	110	2.31976e-05	115	4.05175e-05	120	1.51596e-05	125
	5		10		15		20		25		30		35	3.33386e-05	40	1.94608e-05	45	4.79635e-05	50	1.61079e-05	55	4.27715e-05	60	3.50885e-05	65		70		75		80		85		90		95	2.49563e-05	100	2.32278e-05	105	1.95655e-05	110	5.29304e-05	115	3.20828e-05	120	4.01877e-05	125
	5		10		15		20		25		30		35	2.34338e-05	40	4.29631e-05	45	3.51424e-05	50	3.08035e-05	55	4.49294e-05	60	2.56968e-05	65		70		75		80		85		90		95	3.04038e-05	100	4.79695e-05	105	2.70157e-05	110	1.81143e-05	115	3.42281e-05	120	2.08897e-05	125
	5		10		15		20		25		30		35	2.55489e-05	40	2.55118e-05	45	2.73442e-05	50	2.28103e-05	55	2.97464e-05	60	3.43132e-05	65		70		75		80		85		90		95	0.000267077	100	3.34713e-05	105	6.76795e-05	110	3.13949e-05	115	7.66424e-05	120	1.38519e-05	125
	5		10		15		20		25		30		35	0.000123202	40	2.52213e-05	45	3.78233e-05	50	2.82613e-05	55	6.92968e-05	60	2.63511e-05	65		70		75		80		85		90		95	2.09515e-05	100	2.54437e-05	105	6.18386e-05	110	1.79521e-05	115	3.02823e-05	120	1.55305e-05	125
	5		10		15		20		25		30		35	3.21936e-05	40	3.58974e-05	45	5.90105e-05	50	2.51227e-05	55	5.50725e-05	60	2.91645e-05	65		70		75		80		85		90		95	2.2317e-05	100	3.88255e-05	105	3.21237e-05	110	1.20192e-05	115	3.10875e-05	120	1.54997e-05	125
	5		10		15		20		25		30		35	4.59889e-05	40	3.12638e-05	45	5.28869e-05	50	1.46746e-05	55	2.66886e-05	60	2.88682e-05	65		70		75		80		85		90		95	2.062e-05	100	1.70615e-05	105	2.16196e-05	110	2.32855e-05	115	3.14403e-05	120	1.56537e-05	125
	5		10		15		20		25		30		35	3.22222e-05	40	6.37274e-05	45	5.60956e-05	50	1.94248e-05	55	2.88217e-05	60	6.36946e-05	65		70		75		80		85		90		95	2.20851e-05	100	2.28024e-05	105	4.42897e-05	110	3.02463e-05	115	4.62496e-05	120	2.24907e-05	125
	5		10		15		20		25		30		35	5.98541e-05	40	5.10226e-05	45	4.08039e-05	50	1.78936e-05	55	3.75225e-05	60	2.63525e-05	65		70		75		80		85		90		95	0.000114291	100	1.65918e-05	105	8.43803e-05	110	3.40065e-05	115	4.9398e-05	120	1.62741e-05	125
	5		10		15		20		25		30		35	0.000106351	40	2.09712e-05	45	6.87317e-05	50	1.56064e-05	55	2.86675e-05	60	3.41122e-05	65		70		75		80		85		90		95	2.31971e-05	100	3.98115e-05	105	8.65486e-05	110	3.15868e-05	115	4.8052e-05	120	2.27649e-05	125
	5		10		15		20		25		30		35	3.5182e-05	40	2.24089e-05	45	0.000106989	50	1.69197e-05	55	2.80077e-05	60	2.56631e-05	65		70		75		80		85		90		95	5.82539e-05	100	2.23758e-05	105	2.16664e-05	110	3.00675e-05	115	3.64399e-05	120	1.91785e-05	125
	5		10		15		20		25		30		35	2.44959e-05	40	3.80836e-05	45	8.89965e-05	50	1.66111e-05	55	7.44068e-05	60	5.51868e-05	65		70		75		80		85		90		95	6.24238e-05	100	3.97209e-05	105	2.31506e-05	110	2.57431e-05	115	3.36671e-05	120	1.56732e-05	125
	5		10		15		20		25		30		35	8.93141e-05	40	5.22273e-05	45	5.42855e-05	50	1.53328e-05	55	4.46368e-05	60	4.65431e-05	65		70		75		80		85		90		95	2.45697e-05	100	2.17576e-05	105	2.10077e-05	110	5.46816e-05	115	3.04508e-05	120	4.50129e-05	125
	5		10		15		20		25		30		35	2.39214e-05	40	3.29171e-05	45	4.24899e-05	50	2.38913e-05	55	6.07554e-05	60	2.55777e-05	65		70		75		80		85		90		95	2.49682e-05	100	2.10796e-05	105	2.04298e-05	110	4.05529e-05	115	3.13465e-05	120	3.83977e-05	125
	5		10		15		20		25		30		35	2.24842e-05	40	2.33916e-05	45	2.92447e-05	50	1.65234e-05	55	3.65989e-05	60	3.22875e-05	65		70		75		80		85		90		95	2.62844e-05	100	1.70572e-05	105	4.13185e-05	110	1.76297e-05	115	4.15315e-05	120	1.52544e-05	125
	5		10		15		20		25		30		35	2.06322e-05	40	2.97849e-05	45	3.87615e-05	50	1.64112e-05	55	3.22385e-05	60	6.84778e-05	65		70		75		80		85		90		95	2.11302e-05	100	1.67319e-05	105	3.16947e-05	110	0.000128704	115	4.29354e-05	120	1.57625e-05	125
	5		10		15		20		25		30		35	2.34179e-05	40	4.16668e-05	45	3.16299e-05	50	1.35625e-05	55	2.7847e-05	60	2.6032e-05	65		70		75		80		85		90		95	3.7655e-05	100	2.44832e-05	105	1.98118e-05	110	3.8225e-05	115	3.29697e-05	120	1.8011e-05	125
	5		10		15		20		25		30		35	6.05056e-05	40	7.70664e-05	45	3.37547e-05	50	1.51472e-05	55	5.33088e-05	60	3.9298e-05	65		70		75		80		85		90		95	3.27758e-05	100	3.08001e-05	105	1.98055e-05	110	2.92033e-05	115	3.09107e-05	120	1.79606e-05	125
	5		10		15		20		25		30		35	2.22174e-05	40	2.28449e-05	45	3.39258e-05	50	1.81824e-05	55	4.27761e-05	60	4.84651e-05	65		70		75		80		85		90		95	2.92659e-05	100	3.01755e-05	105	0.000132857	110	3.16462e-05	115	3.9165e-05	120	1.55294e-05	125
	5		10		15		20		25		30		35	2.50024e-05	40	2.0619e-05	45	2.68563e-05	50	1.48627e-05	55	2.72813e-05	60	2.5214e-05	65		70		75		80		85		90		95	2.42731e-05	100	3.30064e-05	105	1.97158e-05	110	3.2891e-05	115	4.01305e-05	120	1.63964e-05	125
	5		10		15		20		25		30		35	2.15702e-05	40	2.50715e-05	45	3.01746e-05	50	3.37378e-05	55	3.15218e-05	60	3.68343e-05	65		70		75		80		85		90		95	0.000338622	100	5.45291e-05	105	2.02742e-05	110	3.04272e-05	115	2.9692e-05	120	0.000147471	125
	5		10		15		20		25		30		35	2.60934e-05	40	1.96719e-05	45	3.30091e-05	50	1.5689e-05	55	2.92853e-05	60	4.13511e-05	65		70		75		80		85		90		95	4.79454e-05	100	3.13585e-05	105		110	0.000209193	115	4.51107e-05	120	2.02209e-05	125
	5		10		15		20		25		30		35	2.04982e-05	40	2.35046e-05	45	3.05576e-05	50	2.36978e-05	55	3.36986e-05	60	3.47471e-05	65		70		75		80		85		90		95	0.000406293	100	2.49451e-05	105		110	7.22563e-05	115	3.14928e-05	120	5.73534e-05	125
	5		10		15		20		25		30		35	3.65807e-05	40	2.93413e-05	45	3.07849e-05	50	1.30895e-05	55	3.49965e-05	60	3.07114e-05	65		70		75		80		85		90		95	2.05052e-05	100	1.95908e-05	105		110	3.06083e-05	115	3.29839e-05	120	5.82777e-05	125
	5		10		15		20		25		30		35	6.53739e-05	40	1.95262e-05	45	0.000159864	50	1.64175e-05	55	5.11749e-05	60	4.93419e-05	65		70		75		80		85		90		95	3.06672e-05	100	1.94985e-05	105		110	4.00604e-05	115	3.20063e-05	120	1.40674e-05	125
	5		10		15		20		25		30		35	3.12597e-05	40	2.25984e-05	45	3.08976e-05	50	1.93122e-05	55	3.4739e-05	60	4.58169e-05	65		70		75		80		85		90		95	4.15887e-05	100	1.82716e-05	105		110	2.11393e-05	115	3.87981e-05	120	1.80466e-05	125
	5		10		15		20		25		30		35	0.000100581	40	2.2279e-05	45	5.54911e-05	50	1.56762e-05	55	2.70308e-05	60	3.88763e-05	65		70		75		80		85		90		95	5.19991e-05	100	3.86182e-05	105		110	2.89484e-05	115		120	1.46567e-05	125
	5		10		15		20		25		30		35	2.31947e-05	40	2.7446e-05	45	3.07771e-05	50	1.33083e-05	55	3.13072e-05	60	3.54015e-05	65		70		75		80		85		90		95	2.52718e-05	100	2.17181e-05	105		110	2.74166e-05	115		120	3.07276e-05	125
	5		10		15		20		25		30		35	0.000104664	40	2.88485e-05	45	3.71164e-05	50	1.52635e-05	55	4.49859e-05	60	3.6964e-05	65		70		75		80		85		90		95	2.44836e-05	100	6.23879e-05	105		110	5.14134e-05	115		120	1.67441e-05	125
	5		10		15		20		25		30		35	2.76845e-05	40	3.0028e-05	45	3.37046e-05	50	1.92871e-05	55	2.74486e-05	60	3.43935e-05	65		70		75		80		85		90		95		100	3.2956e-05	105		110	2.0876e-05	115		120	1.81872e-05	125
	5		10		15		20		25		30		35	2.92055e-05	40	2.18106e-05	45	3.59883e-05	50	1.8892e-05	55	3.74454e-05	60	6.04053e-05	65		70		75		80		85		90		95		100	2.62777e-05	105		110	1.20004e-05	115		120	2.38739e-05	125
	5		10		15		20		25		30		35	9.67903e-05	40	1.9738e-05	45	3.86844e-05	50	1.74583e-05	55	2.80058e-05	60	5.97363e-05	65		70		75		80		85		90		95		100	2.16456e-05	105		110	1.20868e-05	115		120	1.4562e-05	125
	5		10		15		20		25		30		35	6.79223e-05	40	4.22376e-05	45	4.04064e-05	50	1.79902e-05	55	3.27779e-05	60	2.76195e-05	65		70		75		80		85		90		95		100	1.855e-05	105		110	1.27331e-05	115		120	1.48574e-05	125
	5		10		15		20		25		30		35	2.33942e-05	40	4.06396e-05	45	4.03048e-05	50	1.48369e-05	55	2.76045e-05	60	2.92948e-05	65		70		75		80		85		90		95		100	2.26732e-05	105		110	5.81154e-05	115		120	1.92194e-05	125
	5		10		15		20		25		30		35	0.000156161	40	2.34583e-05	45	4.2943e-05	50	1.42332e-05	55	3.4837e-05	60	3.34131e-05	65		70		75		80		85		90		95		100	3.4392e-05	105		110	2.22133e-05	115		120	1.98716e-05	125
	5		10		15		20		25		30		35	0.000178141	40	5.81e-05	45	5.38148e-05	50	1.95382e-05	55	2.86958e-05	60	3.22423e-05	65		70		75		80		85		90		95		100	2.27722e-05	105		110	2.83106e-05	115		120	6.20018e-05	125
	5		10		15		20		25		30		35	2.50765e-05	40	3.96965e-05	45	3.00035e-05	50	1.83711e-05	55	6.93773e-05	60	0.000101908	65		70		75		80		85		90		95		100	3.80602e-05	105		110	1.6402e-05	115		120	1.56839e-05	125
	5		10		15		20		25		30		35	2.96337e-05	40	3.27975e-05	45	2.7186e-05	50	1.75902e-05	55	6.39969e-05	60	5.01397e-05	65		70		75		80		85		90		95		100	2.36293e-05	105		110	1.94883e-05	115		120	2.07466e-05	125
	5		10		15		20		25		30		35	6.43851e-05	40	2.33547e-05	45	3.96136e-05	50	1.66712e-05	55	3.87475e-05	60	2.9695e-05	65		70		75		80		85		90		95		100	2.62774e-05	105		110	4.15742e-05	115		120	1.75032e-05	125
	5		10		15		20		25		30		35	2.79582e-05	40	2.1038e-05	45	2.88329e-05	50	1.47909e-05	55	2.71394e-05	60	3.99684e-05	65		70		75		80		85		90		95		100	2.20296e-05	105		110	6.29596e-05	115		120	1.51352e-05	125
	5		10		15		20		25		30		35	2.81577e-05	40	1.99038e-05	45	2.77375e-05	50	2.46316e-05	55	2.80925e-05	60	4.97272e-05	65		70		75		80		85		90		95		100	1.84035e-05	105		110	3.15678e-05	115		120	1.96124e-05	125
	5		10		15		20		25		30		35	2.35085e-05	40	3.16242e-05	45	3.17707e-05	50	1.327e-05	55	3.12423e-05	60	2.74474e-05	65		70		75		80		85		90		95		100	3.35253e-05	105		110	5.32163e-05	115		120	1.43337e-05	125
	5		10		15		20		25		30		35	2.86033e-05	40	3.93971e-05	45	3.09166e-05	50		55	3.46935e-05	60	3.28944e-05	65		70		75		80		85		90		95		100	3.01e-05	105		110	2.3947e-05	115		120	1.41999e-05	125
	5		10		15		20		25		30		35	2.85092e-05	40	2.90118e-05	45	3.92649e-05	50		55	0.000102641	60	2.7498e-05	65		70		75		80		85		90		95		100	2.10709e-05	105		110	3.13287e-05	115		120	1.42536e-05	125
	5		10		15		20		25		30		35	3.22243e-05	40	2.70891e-05	45	2.66505e-05	50		55	4.02406e-05	60	3.39032e-05	65		70		75		80		85		90		95		100	2.83183e-05	105		110	1.46331e-05	115		120	1.40401e-05	125
	5		10		15		20		25		30		35	4.21693e-05	40	5.83348e-05	45	3.93179e-05	50		55	2.71751e-05	60	4.23105e-05	65		70		75		80		85		90		95		100	4.51674e-05	105		110	1.62233e-05	115		120	1.53584e-05	125
	5		10		15		20		25		30		35	2.05058e-05	40	1.8089e-05	45	3.34976e-05	50		55	2.88171e-05	60	3.32244e-05	65		70		75		80		85		90		95		100	2.30786e-05	105		110	1.34957e-05	115		120	2.02171e-05	125
	5		10		15		20		25		30		35	2.44909e-05	40	2.43003e-05	45	2.77651e-05	50		55	2.99773e-05	60	2.96121e-05	65		70		75		80		85		90		95		100	2.33827e-05	105		110	3.32391e-05	115		120	1.7632e-05	125
	5		10		15		20		25		30		35	0.000167553	40	2.15289e-05	45	2.95338e-05	50		55	3.31289e-05	60	4.95673e-05	65		70		75		80		85		90		95		100	4.0252e-05	105		110	2.37001e-05	115		120	1.6501e-05	125
	5		10		15		20		25		30		35	2.07807e-05	40	1.90216e-05	45	7.09199e-05	50		55	2.82302e-05	60	3.35589e-05	65		70		75		80		85		90		95		100	2.51583e-05	105		110	1.76114e-05	115		120	1.45716e-05	125
	5		10		15		20		25		30		35	2.23088e-05	40	2.58688e-05	45	2.76216e-05	50		55	4.16263e-05	60	3.81996e-05	65		70		75		80		85		90		95		100	3.92291e-05	105		110	1.62367e-05	115		120	1.52856e-05	125
	5		10		15		20		25		30		35	2.36827e-05	40	5.18199e-05	45	3.41323e-05	50		55	3.35941e-05	60	4.95111e-05	65		70		75		80		85		90		95		100	2.65107e-05	105		110	5.50778e-05	115		120	1.60217e-05	125
	5		10		15		20		25		30		35	0.000260218	40	5.23504e-05	45	3.41429e-05	50		55	3.34708e-05	60	2.51306e-05	65		70		75		80		85		90		95		100	2.11252e-05	105		110	1.65832e-05	115		120	1.55012e-05	125
	5		10		15		20		25		30		35	7.78546e-05	40	5.07225e-05	45	2.85334e-05	50		55	3.59349e-05	60	4.0827e-05	65		70		75		80		85		90		95		100	3.30985e-05	105		110	2.81574e-05	115		120	1.76973e-05	125
	5		10		15		20		25		30		35	2.38055e-05	40	1.89583e-05	45	2.78101e-05	50		55	2.8026e-05	60	5.75989e-05	65		70		75		80		85		90		95		100	1.69185e-05	105		110	8.09029e-05	115		120	1.3743e-05	125
	5		10		15		20		25		30		35	2.08341e-05	40	5.154e-05	45	3.31178e-05	50		55	3.0435e-05	60	3.03757e-05	65		70		75		80		85		90		95		100	2.0166e-05	105		110	5.86086e-05	115		120	1.60433e-05	125
	5		10		15		20		25		30		35	0.00011626	40	2.04976e-05	45	3.14129e-05	50		55	2.73159e-05	60	7.60425e-05	65		70		75		80		85		90		95		100	2.43318e-05	105		110	7.1069e-05	115		120	1.84514e-05	125
	5		10		15		20		25		30		35	2.26417e-05	40	3.79792e-05	45	3.21466e-05	50		55	9.30102e-05	60	3.27265e-05	65		70		75		80		85		90		95		100	2.84004e-05	105		110	0.000255946	115		120	4.03733e-05	125
	5		10		15		20		25		30		35	3.44561e-05	40	2.33562e-05	45	4.48535e-05	50		55	3.86299e-05	60	3.62318e-05	65		70		75		80		85		90		95		100	2.24574e-05	105		110	5.0602e-05	115		120	3.94491e-05	125
	5		10		15		20		25		30		35	9.40823e-05	40	4.28979e-05	45	3.05046e-05	50		55	3.23561e-05	60	4.58171e-05	65		70		75		80		85		90		95		100	2.51388e-05	105		110	7.93427e-05	115		120	1.49935e-05	125
	5		10		15		20		25		30		35	0.000101119	40	2.69688e-05	45	3.02251e-05	50		55	6.33262e-05	60	2.71669e-05	65		70		75		80		85		90		95		100	2.67054e-05	105		110	2.85318e-05	115		120	1.90296e-05	125
	5		10		15		20		25		30		35	2.34591e-05	40	1.98376e-05	45	3.72777e-05	50		55	0.000116102	60	3.42917e-05	65		70		75		80		85		90		95		100	2.1974e-05	105		110	2.3014e-05	115		120	1.37768e-05	125
	5		10		15		20		25		30		35	4.81752e-05	40	1.83888e-05	45	2.9105e-05	50		55	3.05376e-05	60	4.32042e-05	65		70		75		80		85		90		95		100	4.21659e-05	105		110	3.08206e-05	115		120	1.93558e-05	125
	5		10		15		20		25		30		35	8.60097e-05	40	3.53154e-05	45	2.67198e-05	50		55	2.71992e-05	60	3.412e-05	65		70		75		80		85		90		95		100	1.94697e-05	105		110	1.21863e-05	115		120	1.36664e-05	125
	5		10		15		20		25		30		35	2.11959e-05	40	2.94053e-05	45	3.76885e-05	50		55	3.02642e-05	60	2.50693e-05	65		70		75		80		85		90		95		100	2.37382e-05	105		110	1.58804e-05	115		120	1.78365e-05	125
	5		10		15		20		25		30		35	3.24714e-05	40	2.28207e-05	45	3.42183e-05	50		55	4.55689e-05	60	3.91199e-05	65		70		75		80		85		90		95		100	2.99544e-05	105		110	2.19932e-05	115		120	1.59063e-05	125
	5		10		15		20		25		30		35	2.53621e-05	40	2.29508e-05	45	3.20775e-05	50		55	3.50489e-05	60	3.49862e-05	65		70		75		80		85		90		95		100	3.72828e-05	105		110	4.36965e-05	115		120	5.14858e-05	125
	5		10		15		20		25		30		35	3.15705e-05	40	2.67112e-05	45	2.71924e-05	50		55	4.26124e-05	60	2.92014e-05	65		70		75		80		85		90		95		100	1.78289e-05	105		110	1.34139e-05	115		120	2.66916e-05	125
	5		10		15		20		25		30		35	2.40171e-05	40	1.93728e-05	45	2.76418e-05	50		55	3.59677e-05	60	5.65378e-05	65		70		75		80		85		90		95		100	3.04252e-05	105		110	1.46744e-05	115		120	2.11381e-05	125
	5		10		15		20		25		30		35	2.43151e-05	40	3.51103e-05	45	2.99637e-05	50		55	4.27008e-05	60	4.3875e-05	65		70		75		80		85		90		95		100	4.03481e-05	105		110	1.33134e-05	115		120	2.23225e-05	125
	5		10		15		20		25		30		35	3.72204e-05	40	4.54951e-05	45	2.99536e-05	50		55	3.56891e-05	60	3.10142e-05	65		70		75		80		85		90		95		100	4.49795e-05	105		110	2.61408e-05	115		120	2.47468e-05	125
	5		10		15		20		25		30		35	4.07955e-05	40	3.4784e-05	45	2.71913e-05	50		55	3.54454e-05	60	3.69039e-05	65		70		75		80		85		90		95		100	2.29224e-05	105		110	1.29681e-05	115		120	1.57288e-05	125
	5		10		15		20		25		30		35	2.18655e-05	40	3.1693e-05	45	2.71233e-05	50		55	3.25918e-05	60	3.58254e-05	65		70		75		80		85		90		95		100	2.84336e-05	105		110	1.49202e-05	115		120	1.62538e-05	125
	5		10		15		20		25		30		35	4.90055e-05	40	2.42888e-05	45	2.74986e-05	50		55	4.82624e-05	60	2.6291e-05	65		70		75		80		85		90		95		100	2.30132e-05	105		110	4.73626e-05	115		120	1.38928e-05	125
	5		10		15		20		25		30		35	2.92212e-05	40	2.02836e-05	45	3.68179e-05	50		55	3.44056e-05	60	3.6928e-05	65		70		75		80		85		90		95		100	3.59637e-05	105		110	2.0185e-05	115		120	1.64211e-05	125
	5		10		15		20		25		30		35	2.92863e-05	40	3.11786e-05	45	3.58737e-05	50		55	0.000260324	60	2.73285e-05	65		70		75		80		85		90		95		100	4.89705e-05	105		110	7.57776e-05	115		120	2.71355e-05	125
	5		10		15		20		25		30		35	3.0744e-05	40	3.45984e-05	45	2.803e-05	50		55	3.05054e-05	60	3.28201e-05	65		70		75		80		85		90		95		100	3.93536e-05	105		110	1.28876e-05	115		120	1.54527e-05	125
	5		10		15		20		25		30		35	2.64598e-05	40	3.11913e-05	45	3.09699e-05	50		55	2.72739e-05	60	3.77926e-05	65		70		75		80		85		90		95		100	1.85994e-05	105		110	1.92193e-05	115		120	2.12063e-05	125
	5		10		15		20		25		30		35	2.43098e-05	40	2.89434e-05	45	3.7728e-05	50		55	3.15764e-05	60	3.54254e-05	65		70		75		80		85		90		95		100	4.44023e-05	105		110	1.33339e-05	115		120	2.36384e-05	125
	5		10		15		20		25		30		35	4.22142e-05	40	1.97987e-05	45	3.24604e-05	50		55	2.74807e-05	60	2.65946e-05	65		70		75		80		85		90		95		100	3.59959e-05	105		110	1.37641e-05	115		120	0.000331155	125
	5		10		15		20		25		30		35	6.41937e-05	40	1.85041e-05	45	3.27778e-05	50		55	3.3974e-05	60	2.5741e-05	65		70		75		80		85		90		95		100	3.0128e-05	105		110	2.05236e-05	115		120	2.15458e-05	125
	5		10		15		20		25		30		35	0.00015008	40	2.17866e-05	45	3.95605e-05	50		55	4.93083e-05	60	2.92599e-05	65		70		75		80		85		90		95		100	1.65012e-05	105		110	3.05532e-05	115		120	1.35075e-05	125
	5		10		15		20		25		30		35	0.000117973	40	0.000120706	45	4.05868e-05	50		55	2.67057e-05	60	2.95742e-05	65		70		75		80		85		90		95		100	2.7904e-05	105		110	3.14882e-05	115		120	1.41556e-05	125
	5		10		15		20		25		30		35	2.43674e-05	40	5.25263e-05	45	3.6224e-05	50		55	2.73238e-05	60	5.64656e-05	65		70		75		80		85		90		95		100	7.48683e-05	105		110	2.10088e-05	115		120	1.68164e-05	125
	5		10		15		20		25		30		35	2.01975e-05	40	2.20114e-05	45	2.65547e-05	50		55	2.78726e-05	60	2.53961e-05	65		70		75		80		85		90		95		100	1.66751e-05	105		110	1.4501e-05	115		120	1.63447e-05	125
	5		10		15		20		25		30		35	2.37218e-05	40	3.33846e-05	45	2.69164e-05	50		55	3.93977e-05	60	2.64363e-05	65		70		75		80		85		90		95		100	2.13271e-05	105		110	0.000143415	115		120	3.07421e-05	125
	5		10		15		20		25		30		35	3.01876e-05	40	3.15769e-05	45	2.8779e-05	50		55	2.69514e-05	60	2.76611e-05	65		70		75		80		85		90		95		100	1.94301e-05	105		110	5.32493e-05	115		120	1.95458e-05	125
	5		10		15		20		25		30		35	0.000112375	40	2.65426e-05	45	4.23271e-05	50		55	6.05583e-05	60	2.53504e-05	65		70		75		80		85		90		95		100	3.89273e-05	105		110	4.7077e-05	115		120	0.000122948	125
	5		10		15		20		25		30		35	2.1972e-05	40	2.09833e-05	45	4.1373e-05	50		55	4.56182e-05	60	2.83086e-05	65		70		75		80		85		90		95		100	2.15853e-05	105		110	2.72046e-05	115		120	1.55224e-05	125
	5		10		15		20		25		30		35	5.75617e-05	40	2.32987e-05	45	0.000395617	50		55	2.75693e-05	60	2.8871e-05	65		70		75		80		85		90		95		100	1.9336e-05	105		110	4.34773e-05	115		120	1.46415e-05	125
	5		10		15		20		25		30		35	2.33669e-05	40	2.24246e-05	45	3.45252e-05	50		55	4.29639e-05	60	3.24475e-05	65		70		75		80		85		90		95		100	1.87952e-05	105		110	7.13389e-05	115		120	1.5764e-05	125
	5		10		15		20		25		30		35	3.02024e-05	40	2.48055e-05	45	3.15309e-05	50		55	3.09085e-05	60	3.06189e-05	65		70		75		80		85		90		95		100	1.81455e-05	105		110	1.30396e-05	115		120	1.42667e-05	125
	5		10		15		20		25		30		35	3.24412e-05	40	2.7485e-05	45	2.89107e-05	50		55	3.81512e-05	60	3.52082e-05	65		70		75		80		85		90		95		100	0.000105487	105		110	7.21603e-05	115		120	1.52798e-05	125
	5		10		15		20		25		30		35	0.000309079	40	2.34769e-05	45	2.92357e-05	50		55	2.99738e-05	60	2.69691e-05	65		70		75		80		85		90		95		100	5.28503e-05	105		110	1.5595e-05	115		120	1.63097e-05	125
	5		10		15		20		25		30		35	0.000100521	40	2.50553e-05	45	3.51601e-05	50		55	2.818e-05	60	5.46874e-05	65		70		75		80		85		90		95		100	2.26582e-05	105		110	1.9076e-05	115		120	1.66547e-05	125
	5		10		15		20		25		30		35	6.98233e-05	40	2.33934e-05	45	2.73675e-05	50		55	2.72036e-05	60	3.61021e-05	65		70		75		80		85		90		95		100	1.92102e-05	105		110	1.68802e-05	115		120	1.43634e-05	125
	5		10		15		20		25		30		35	3.52431e-05	40	4.08122e-05	45	3.2399e-05	50		55	5.23562e-05	60	2.91996e-05	65		70		75		80		85		90		95		100	1.73859e-05	105		110	5.43786e-05	115		120	1.90157e-05	125
	5		10		15		20		25		30		35	0.000169316	40	2.52389e-05	45	3.06721e-05	50		55	2.7266e-05	60	3.64156e-05	65		70		75		80		85		90		95		100	2.23399e-05	105		110	4.16977e-05	115		120	1.95134e-05	125
	5		10		15		20		25		30		35	7.50724e-05	40	2.26739e-05	45	2.66427e-05	50		55	2.81018e-05	60	2.76194e-05	65		70		75		80		85		90		95		100	2.07729e-05	105		110	5.22633e-05	115		120	1.68455e-05	125
	5		10		15		20		25		30		35	4.06938e-05	40	2.6291e-05	45	3.25143e-05	50		55	3.75511e-05	60	3.32977e-05	65		70		75		80		85		90		95		100	1.91746e-05	105		110	1.45575e-05	115		120	7.94756e-05	125
	5		10		15		20		25		30		35	0.000657598	40	2.80166e-05	45	2.83989e-05	50		55	0.000216197	60	3.21175e-05	65		70		75		80		85		90		95		100	1.65159e-05	105		110	1.67646e-05	115		120	1.73285e-05	125
	5		10		15		20		25		30		35	2.01663e-05	40	3.44159e-05	45	2.95929e-05	50		55	3.37418e-05	60	3.77467e-05	65		70		75		80		85		90		95		100	1.68386e-05	105		110	4.74853e-05	115		120	1.75818e-05	125
	5		10		15		20		25		30		35	2.40297e-05	40	3.64583e-05	45	0.000118397	50		55	3.24213e-05	60	4.33753e-05	65		70		75		80		85		90		95		100	2.12979e-05	105		110	5.48922e-05	115		120	1.41679e-05	125
	5		10		15		20		25		30		35	2.36773e-05	40	2.47506e-05	45	2.91397e-05	50		55	5.1531e-05	60	4.17658e-05	65		70		75		80		85		90		95		100	3.17413e-05	105		110	2.57406e-05	115		120	1.52117e-05	125
	5		10		15		20		25		30		35	2.34313e-05	40	5.28342e-05	45	5.52181e-05	50		55	3.15873e-05	60	3.07969e-05	65		70		75		80		85		90		95		100	1.88303e-05	105		110	5.03652e-05	115		120	2.65987e-05	125
	5		10		15		20		25		30		35	0.000167968	40	2.45231e-05	45	5.04583e-05	50		55	2.88967e-05	60	5.75106e-05	65		70		75		80		85		90		95		100	1.82802e-05	105		110	4.43132e-05	115		120	2.87589e-05	125
	5		10		15		20		25		30		35		40	2.3578e-05	45	3.24147e-05	50		55	3.16171e-05	60	3.1576e-05	65		70		75		80		85		90		95		100	2.46466e-05	105		110	7.19741e-05	115		120	1.91305e-05	125
	5		10		15		20		25		30		35		40	3.12136e-05	45	2.67691e-05	50		55	4.31226e-05	60	2.68374e-05	65		70		75		80		85		90		95		100	2.39776e-05	105		110	5.06619e-05	115		120	1.86738e-05	125
	5		10		15		20		25		30		35		40	4.08042e-05	45	4.37139e-05	50		55	3.64089e-05	60	2.50746e-05	65		70		75		80		85		90		95		100	2.1606e-05	105		110	1.40407e-05	115		120	1.41115e-05	125
	5		10		15		20		25		30		35		40	2.20829e-05	45	3.10134e-05	50		55	2.66893e-05	60	2.84997e-05	65		70		75		80		85		90		95		100	1.77805e-05	105		110	3.42473e-05	115		120	3.06453e-05	125
	5		10		15		20		25		30		35		40	2.09297e-05	45	2.89661e-05	50		55	2.81508e-05	60	2.96689e-05	65		70		75		80		85		90		95		100	2.10912e-05	105		110	1.55144e-05	115		120	1.92283e-05	125
	5		10		15		20		25		30		35		40	2.10793e-05	45	2.90661e-05	50		55	4.52398e-05	60	2.94711e-05	65		70		75		80		85		90		95		100	1.95679e-05	105		110	2.05362e-05	115		120	1.80066e-05	125
	5		10		15		20		25		30		35		40	6.95894e-05	45	4.38034e-05	50		55	3.02917e-05	60	2.84543e-05	65		70		75		80		85		90		95		100	5.73025e-05	105		110	1.71292e-05	115		120	2.73353e-05	125
	5		10		15		20		25		30		35		40	2.07693e-05	45	2.79321e-05	50		55	3.75739e-05	60	3.09059e-05	65		70		75		80		85		90		95		100	1.79591e-05	105		110	1.73165e-05	115		120	1.42857e-05	125
	5		10		15		20		25		30		35		40	4.73291e-05	45	4.41506e-05	50		55	5.35881e-05	60	3.64277e-05	65		70		75		80		85		90		95		100	2.70026e-05	105		110	0.000783235	115		120	1.63977e-05	125
	5		10		15		20		25		30		35		40	2.26352e-05	45	3.39552e-05	50		55	3.56183e-05	60	2.51529e-05	65		70		75		80		85		90		95		100	2.71533e-05	105		110	3.89824e-05	115		120	1.57783e-05	125
	5		10		15		20		25		30		35		40	3.28219e-05	45	2.71537e-05	50		55	3.20778e-05	60	5.53415e-05	65		70		75		80		85		90		95		100	3.40152e-05	105		110	1.74015e-05	115		120	2.36372e-05	125
	5		10		15		20		25		30		35		40	2.0573e-05	45	3.08219e-05	50		55	3.92553e-05	60	3.39279e-05	65		70		75		80		85		90		95		100	1.85296e-05	105		110	1.51081e-05	115		120	1.49848e-05	125
	5		10		15		20		25		30		35		40	5.32769e-05	45	4.53727e-05	50		55	3.92568e-05	60	2.9302e-05	65		70		75		80		85		90		95		100	1.91215e-05	105		110	3.96617e-05	115		120	1.55412e-05	125
	5		10		15		20		25		30		35		40	4.20328e-05	45	4.69676e-05	50		55	2.73535e-05	60	2.52095e-05	65		70		75		80		85		90		95		100	0.000142875	105		110	1.21726e-05	115		120	2.16994e-05	125
	5		10		15		20		25		30		35		40	5.5167e-05	45	3.30954e-05	50		55	6.52481e-05	60	6.48052e-05	65		70		75		80		85		90		95		100	1.79173e-05	105		110	1.59203e-05	115		120	1.35403e-05	125
	5		10		15		20		25		30		35		40	2.46719e-05	45	5.37641e-05	50		55	3.06013e-05	60	3.21564e-05	65		70		75		80		85		90		95		100	2.20305e-05	105		110	2.14537e-05	115		120	2.02976e-05	125
	5		10		15		20		25		30		35		40	3.0527e-05	45	4.97038e-05	50		55	3.46489e-05	60	3.07222e-05	65		70		75		80		85		90		95		100	1.76605e-05	105		110	3.32836e-05	115		120	1.37982e-05	125
	5		10		15		20		25		30		35		40	2.32738e-05	45	2.77962e-05	50		55	3.01265e-05	60	2.93763e-05	65		70		75		80		85		90		95		100	1.80287e-05	105		110	3.28994e-05	115		120	1.8791e-05	125
	5		10		15		20		25		30		35		40	5.1365e-05	45	3.33447e-05	50		55	3.02577e-05	60	3.22834e-05	65		70		75		80		85		90		95		100	1.91137e-05	105		110	1.5659e-05	115		120	2.4381e-05	125
	5		10		15		20		25		30		35		40	0.000175565	45	5.87484e-05	50		55	3.01578e-05	60	4.17379e-05	65		70		75		80		85		90		95		100	1.91095e-05	105		110	7.22786e-05	115		120	1.51571e-05	125
	5		10		15		20		25		30		35		40	5.28681e-05	45	5.02156e-05	50		55	2.93447e-05	60	5.55009e-05	65		70		75		80		85		90		95		100	2.17947e-05	105		110	1.37201e-05	115		120	1.68798e-05	125
	5		10		15		20		25		30		35		40	4.14534e-05	45	2.76101e-05	50		55	2.94542e-05	60	2.94271e-05	65		70		75		80		85		90		95		100	1.90802e-05	105		110	1.77578e-05	115		120	1.6759e-05	125
	5		10		15		20		25		30		35		40	2.09435e-05	45	3.08092e-05	50		55	4.40722e-05	60	3.2212e-05	65		70		75		80		85		90		95		100	2.19597e-05	105		110	3.46195e-05	115		120	1.51361e-05	125
	5		10		15		20		25		30		35		40	0.000282137	45	3.9337e-05	50		55	3.53467e-05	60	2.71314e-05	65		70		75		80		85		90		95		100	1.72196e-05	105		110	1.7213e-05	115		120	1.57283e-05	125
	5		10		15		20		25		30		35		40	2.64204e-05	45	2.76128e-05	50		55	2.98578e-05	60	3.46992e-05	65		70		75		80		85		90		95		100	2.2411e-05	105		110	3.40729e-05	115		120	2.05483e-05	125
	5		10		15		20		25		30		35		40	3.0192e-05	45	2.75096e-05	50		55	4.09735e-05	60	2.63683e-05	65		70		75		80		85		90		95		100	4.30315e-05	105		110	1.55132e-05	115		120	1.78638e-05	125
	5		10		15		20		25		30		35		40	2.87405e-05	45	3.21905e-05	50		55	3.64896e-05	60	0.000236089	65		70		75		80		85		90		95		100	2.1257e-05	105		110	1.81035e-05	115		120	2.03237e-05	125
	5		10		15		20		25		30		35		40	3.30177e-05	45	4.00518e-05	50		55	2.7234e-05	60	5.01344e-05	65		70		75		80		85		90		95		100	2.47611e-05	105		110	1.2732e-05	115		120	1.95554e-05	125
	5		10		15		20		25		30		35		40	2.49003e-05	45	3.38017e-05	50		55	3.33075e-05	60	3.95019e-05	65		70		75		80		85		90		95		100	3.44895e-05	105		110	2.53995e-05	115		120	1.54044e-05	125
	5		10		15		20		25		30		35		40	2.27142e-05	45	4.12718e-05	50		55	2.73614e-05	60	3.16426e-05	65		70		75		80		85		90		95		100	2.71629e-05	105		110	2.71948e-05	115		120	1.64247e-05	125
	5		10		15		20		25		30		35		40	3.26012e-05	45	4.53563e-05	50		55	2.96402e-05	60	2.67685e-05	65		70		75		80		85		90		95		100	1.68625e-05	105		110	3.10925e-05	115		120	1.50548e-05	125
	5		10		15		20		25		30		35		40	1.85004e-05	45	3.20026e-05	50		55	2.9236e-05	60	3.66947e-05	65		70		75		80		85		90		95		100	3.38484e-05	105		110	3.08386e-05	115		120	1.53921e-05	125
	5		10		15		20		25		30		35		40	1.81455e-05	45	3.27566e-05	50		55	4.31069e-05	60	3.71884e-05	65		70		75		80		85		90		95		100	2.91241e-05	105		110	2.05336e-05	115		120	1.93672e-05	125
	5		10		15		20		25		30		35		40	1.83467e-05	45	2.93915e-05	50		55	3.20732e-05	60	3.66872e-05	65		70		75		80		85		90		95		100	1.82068e-05	105		110	5.80897e-05	115		120	1.48062e-05	125
	5		10		15		20		25		30		35		40	2.8129e-05	45	3.5784e-05	50		55	2.9206e-05	60	4.05099e-05	65		70		75		80		85		90		95		100	2.30406e-05	105		110	3.01395e-05	115		120	1.4333e-05	125
	5		10		15		20		25		30		35		40	3.4517e-05	45	3.51439e-05	50		55	3.42051e-05	60	4.12129e-05	65		70		75		80		85		90		95		100	1.70982e-05	105		110	4.11252e-05	115		120	1.57432e-05	125
	5		10		15		20		25		30		35		40	6.43114e-05	45	3.34576e-05	50		55	4.09089e-05	60	3.03207e-05	65		70		75		80		85		90		95		100	3.24196e-05	105		110	3.47197e-05	115		120	1.47849e-05	125
	5		10		15		20		25		30		35		40	3.07259e-05	45	4.05608e-05	50		55	2.84016e-05	60	4.5809e-05	65		70		75		80		85		90		95		100	5.58978e-05	105		110	1.70801e-05	115		120	1.54989e-05	125
	5		10		15		20		25		30		35		40	5.38912e-05	45	3.43013e-05	50		55	3.30793e-05	60	4.35062e-05	65		70		75		80		85		90		95		100	6.78843e-05	105		110	2.79009e-05	115		120	1.64246e-05	125
	5		10		15		20		25		30		35		40	4.00999e-05	45	2.87639e-05	50		55	2.95598e-05	60	4.63389e-05	65		70		75		80		85		90		95		100	2.49031e-05	105		110	3.49764e-05	115		120	1.99552e-05	125
	5		10		15		20		25		30		35		40	2.03056e-05	45	2.95056e-05	50		55	6.24005e-05	60	2.91702e-05	65		70		75		80		85		90		95		100	3.65474e-05	105		110	2.50783e-05	115		120	2.02348e-05	125
	5		10		15		20		25		30		35		40	2.90747e-05	45	3.7898e-05	50		55	2.98654e-05	60	3.14604e-05	65		70		75		80		85		90		95		100	2.29808e-05	105		110	3.90186e-05	115		120	7.46304e-05	125
	5		10		15		20		25		30		35		40	2.50717e-05	45	3.18839e-05	50		55	4.21888e-05	60	3.79924e-05	65		70		75		80		85		90		95		100	2.21362e-05	105		110	1.42966e-05	115		120	1.63913e-05	125
	5		10		15		20		25		30		35		40	2.36826e-05	45	2.7104e-05	50		55	2.92648e-05	60	2.59286e-05	65		70		75		80		85		90		95		100	2.36946e-05	105		110	2.0934e-05	115		120	1.37789e-05	125
	5		10		15		20		25		30		35		40	5.33251e-05	45	3.29622e-05	50		55	4.65043e-05	60	0.000220371	65		70		75		80		85		90		95		100	2.48279e-05	105		110	5.53405e-05	115		120	1.35572e-05	125
	5		10		15		20		25		30		35		40	2.50961e-05	45	8.4922e-05	50		55	2.94916e-05	60	4.09915e-05	65		70		75		80		85		90		95		100	2.28752e-05	105		110	2.35812e-05	115		120	3.85916e-05	125
	5		10		15		20		25		30		35		40	2.22916e-05	45	8.2658e-05	50		55	3.30788e-05	60	4.10886e-05	65		70		75		80		85		90		95		100	2.91924e-05	105		110	3.32121e-05	115		120	1.58145e-05	125
	5		10		15		20		25		30		35		40	2.30747e-05	45	0.000201637	50		55	2.96634e-05	60	3.06949e-05	65		70		75		80		85		90		95		100	2.32304e-05	105		110	1.69399e-05	115		120	1.92561e-05	125
	5		10		15		20		25		30		35		40	1.88712e-05	45	2.70538e-05	50		55	2.81711e-05	60	5.57014e-05	65		70		75		80		85		90		95		100	2.94822e-05	105		110	1.46616e-05	115		120	1.61251e-05	125
	5		10		15		20		25		30		35		40	1.88606e-05	45	2.67162e-05	50		55	2.93893e-05	60	2.97749e-05	65		70		75		80		85		90		95		100	2.86192e-05	105		110	1.94669e-05	115		120	1.45196e-05	125
	5		10		15		20		25		30		35		40	2.46038e-05	45	3.31947e-05	50		55	0.000680139	60	4.13861e-05	65		70		75		80		85		90		95		100	1.94747e-05	105		110	1.24426e-05	115		120	1.51924e-05	125
	5		10		15		20		25		30		35		40	7.0768e-05	45	3.07036e-05	50		55	2.69089e-05	60	3.56953e-05	65		70		75		80		85		90		95		100	1.82543e-05	105		110	2.83708e-05	115		120	1.38303e-05	125
	5		10		15		20		25		30		35		40	3.69234e-05	45	2.84311e-05	50		55	3.45297e-05	60	4.49412e-05	65		70		75		80		85		90		95		100	2.79118e-05	105		110	8.87649e-05	115		120	2.22702e-05	125
	5		10		15		20		25		30		35		40	6.38922e-05	45	6.49441e-05	50		55	3.46504e-05	60	5.18028e-05	65		70		75		80		85		90		95		100	0.000568354	105		110	1.56485e-05	115		120	1.51454e-05	125
	5		10		15		20		25		30		35		40	6.3965e-05	45	4.93715e-05	50		55	4.02104e-05	60	3.3265e-05	65		70		75		80		85		90		95		100	1.76518e-05	105		110	0.000111229	115		120	1.50882e-05	125
	5		10		15		20		25		30		35		40	2.01619e-05	45	3.27343e-05	50		55	2.9119e-05	60	2.64202e-05	65		70		75		80		85		90		95		100	2.52623e-05	105		110	5.3039e-05	115		120	2.44871e-05	125
	5		10		15		20		25		30		35		40	2.26068e-05	45	2.88238e-05	50		55	3.45574e-05	60	3.99683e-05	65		70		75		80		85		90		95		100	2.64056e-05	105		110	5.93468e-05	115		120	2.86062e-05	125
	5		10		15		20		25		30		35		40	2.55393e-05	45	3.04646e-05	50		55	4.99488e-05	60	3.38888e-05	65		70		75		80		85		90		95		100	3.31556e-05	105		110	1.7515e-05	115		120	2.65757e-05	125
	5		10		15		20		25		30		35		40	4.6204e-05	45	3.97363e-05	50		55	0.000145204	60	3.16585e-05	65		70		75		80		85		90		95		100	1.91921e-05	105		110	2.82102e-05	115		120	2.43821e-05	125
	5		10		15		20		25		30		35		40	3.33634e-05	45	2.936e-05	50		55	0.000119977	60	2.79925e-05	65		70		75		80		85		90		95		100	3.30048e-05	105		110	5.27234e-05	115		120	1.96381e-05	125
	5		10		15		20		25		30		35		40	0.000458504	45	2.89047e-05	50		55	3.74082e-05	60	3.17237e-05	65		70		75		80		85		90		95		100	2.54656e-05	105		110	3.62326e-05	115		120	1.45653e-05	125
	5		10		15		20		25		30		35		40	4.9136e-05	45	3.66564e-05	50		55	3.7052e-05	60	3.51842e-05	65		70		75		80		85		90		95		100	1.75563e-05	105		110	4.32325e-05	115		120	1.5044e-05	125
	5		10		15		20		25		30		35		40	6.17762e-05	45	5.29422e-05	50		55	3.16421e-05	60	4.57074e-05	65		70		75		80		85		90		95		100	1.95012e-05	105		110	1.80511e-05	115		120	1.80263e-05	125
	5		10		15		20		25		30		35		40	9.24579e-05	45	6.26745e-05	50		55	3.08268e-05	60	4.01429e-05	65		70		75		80		85		90		95		100	2.0862e-05	105		110	1.23534e-05	115		120	2.161e-05	125
	5		10		15		20		25		30		35		40	2.29188e-05	45	4.1102e-05	50		55	3.37701e-05	60	2.69052e-05	65		70		75		80		85		90		95		100	2.57376e-05	105		110	1.33128e-05	115		120	1.86728e-05	125
	5		10		15		20		25		30		35		40	2.48383e-05	45	2.91195e-05	50		55	3.50266e-05	60	3.70678e-05	65		70		75		80		85		90		95		100	2.88765e-05	105		110	4.45153e-05	115		120	1.71829e-05	125
	5		10		15		20		25		30		35		40	2.21299e-05	45	2.76187e-05	50		55	3.20265e-05	60	3.02304e-05	65		70		75		80		85		90		95		100	5.23701e-05	105		110	3.48369e-05	115		120	3.94319e-05	125
	5		10		15		20		25		30		35		40	1.82741e-05	45	3.72168e-05	50		55	2.81392e-05	60	3.08426e-05	65		70		75		80		85		90		95		100	1.93928e-05	105		110	2.82526e-05	115		120	2.85249e-05	125
	5		10		15		20		25		30		35		40	1.97704e-05	45	2.7531e-05	50		55	6.40582e-05	60	3.19842e-05	65		70		75		80		85		90		95		100	2.99874e-05	105		110	1.68982e-05	115		120	1.53567e-05	125
	5		10		15		20		25		30		35		40	1.81299e-05	45	3.27743e-05	50		55	3.20576e-05	60	4.35772e-05	65		70		75		80		85		90		95		100	2.32148e-05	105		110	1.26845e-05	115		120	1.71104e-05	125
	5		10		15		20		25		30		35		40	2.33798e-05	45	3.71656e-05	50		55	6.34455e-05	60	3.05078e-05	65		70		75		80		85		90		95		100	2.01697e-05	105		110	3.34161e-05	115		120	2.7978e-05	125
	5		10		15		20		25		30		35		40	5.2307e-05	45	6.74152e-05	50		55	3.93611e-05	60	2.88766e-05	65		70		75		80		85		90		95		100	3.2083e-05	105		110	1.50185e-05	115		120	2.51794e-05	125
	5		10		15		20		25		30		35		40	5.8084e-05	45	3.33727e-05	50		55	5.1401e-05	60	3.41843e-05	65		70		75		80		85		90		95		100	2.8903e-05	105		110	4.73358e-05	115		120	1.79777e-05	125
	5		10		15		20		25		30		35		40	6.58705e-05	45	3.62974e-05	50		55	3.51488e-05	60	4.77331e-05	65		70		75		80		85		90		95		100	2.53014e-05	105		110	2.82102e-05	115		120	2.20493e-05	125
	5		10		15		20		25		30		35		40	4.63468e-05	45	4.23251e-05	50		55	2.98993e-05	60	6.08547e-05	65		70		75		80		85		90		95		100	1.85793e-05	105		110	1.54741e-05	115		120	1.36258e-05	125
	5		10		15		20		25		30		35		40	4.33652e-05	45	3.27621e-05	50		55	3.24027e-05	60	5.62768e-05	65		70		75		80		85		90		95		100	2.26211e-05	105		110	2.39472e-05	115		120	1.50737e-05	125
	5		10		15		20		25		30		35		40	3.71807e-05	45	2.6759e-05	50		55	3.97733e-05	60	6.00807e-05	65		70		75		80		85		90		95		100	2.17242e-05	105		110	2.45218e-05	115		120	1.35825e-05	125
	5		10		15		20		25		30		35		40	3.33986e-05	45	3.11654e-05	50		55	3.899e-05	60	2.72616e-05	65		70		75		80		85		90		95		100	1.68387e-05	105		110	1.38945e-05	115		120	2.60673e-05	125
	5		10		15		20		25		30		35		40	3.27091e-05	45	3.49961e-05	50		55	2.73503e-05	60	6.50033e-05	65		70		75		80		85		90		95		100	6.6012e-05	105		110	2.30019e-05	115		120	2.15109e-05	125
	5		10		15		20		25		30		35		40	1.9701e-05	45	5.48737e-05	50		55	3.3659e-05	60	0.000383825	65		70		75		80		85		90		95		100	1.74581e-05	105		110	3.42046e-05	115		120	1.60363e-05	125
	5		10		15		20		25		30		35		40	1.89478e-05	45	6.1911e-05	50		55	3.39806e-05	60	2.94292e-05	65		70		75		80		85		90		95		100	2.12557e-05	105		110	1.89506e-05	115		120	1.54856e-05	125
	5		10		15		20		25		30		35		40	3.47847e-05	45	5.21758e-05	50		55	3.22547e-05	60	4.52866e-05	65		70		75		80		85		90		95		100	2.4483e-05	105		110	1.53419e-05	115		120	3.6824e-05	125
	5		10		15		20		25		30		35		40	2.09324e-05	45	3.12278e-05	50		55	3.64553e-05	60	4.59585e-05	65		70		75		80		85		90		95		100	2.91565e-05	105		110	5.96907e-05	115		120	5.07578e-05	125
	5		10		15		20		25		30		35		40	3.62944e-05	45	3.111e-05	50		55	3.03518e-05	60	3.9677e-05	65		70		75		80		85		90		95		100	1.66186e-05	105		110	5.70398e-05	115		120	1.63797e-05	125
	5		10		15		20		25		30		35		40	5.16294e-05	45	3.91039e-05	50		55		60	2.8121e-05	65		70		75		80		85		90		95		100	4.41403e-05	105		110	1.93393e-05	115		120	1.74014e-05	125
	5		10		15		20		25		30		35		40	2.00226e-05	45	2.96669e-05	50		55		60	5.10419e-05	65		70		75		80		85		90		95		100	1.7332e-05	105		110	5.17233e-05	115		120	1.49858e-05	125
	5		10		15		20		25		30		35		40	3.64815e-05	45	8.23557e-05	50		55		60	5.98561e-05	65		70		75		80		85		90		95		100	4.09245e-05	105		110	3.59031e-05	115		120	1.58954e-05	125
	5		10		15		20		25		30		35		40	3.62205e-05	45	4.60631e-05	50		55		60	2.82974e-05	65		70		75		80		85		90		95		100	1.87189e-05	105		110	8.46622e-05	115		120	1.51923e-05	125
	5		10		15		20		25		30		35		40	8.15531e-05	45	3.17131e-05	50		55		60	2.67562e-05	65		70		75		80		85		90		95		100	2.84042e-05	105		110	1.29574e-05	115		120	1.59305e-05	125
	5		10		15		20		25		30		35		40	2.77266e-05	45	2.89256e-05	50		55		60	3.13481e-05	65		70		75		80		85		90		95		100	2.54023e-05	105		110	1.75348e-05	115		120	2.1807e-05	125
	5		10		15		20		25		30		35		40	2.59912e-05	45	3.52548e-05	50		55		60	2.7625e-05	65		70		75		80		85		90		95		100	2.31633e-05	105		110	6.68984e-05	115		120	1.41902e-05	125
	5		10		15		20		25		30		35		40	3.1035e-05	45	2.96098e-05	50		55		60	3.64132e-05	65		70		75		80		85		90		95		100	3.54335e-05	105		110	1.31326e-05	115		120	1.64745e-05	125
	5		10		15		20		25		30		35		40	0.000130542	45	3.82163e-05	50		55		60	4.71233e-05	65		70		75		80		85		90		95		100	3.95577e-05	105		110	1.42685e-05	115		120	1.45125e-05	125
	5		10		15		20		25		30		35		40	0.00011015	45	2.95406e-05	50		55		60	3.0053e-05	65		70		75		80		85		90		95		100	2.3351e-05	105		110	2.15467e-05	115		120	1.40062e-05	125
	5		10		15		20		25		30		35		40	3.27642e-05	45	2.7221e-05	50		55		60	2.55376e-05	65		70		75		80		85		90		95		100	1.66474e-05	105		110	4.0015e-05	115		120	2.05388e-05	125
	5		10		15		20		25		30		35		40	2.15033e-05	45	3.9548e-05	50		55		60	0.000156147	65		70		75		80		85		90		95		100	2.43623e-05	105		110	5.55513e-05	115		120	2.19512e-05	125
	5		10		15		20		25		30		35		40	4.21344e-05	45	3.28558e-05	50		55		60	4.15064e-05	65		70		75		80		85		90		95		100	6.93228e-05	105		110	1.90722e-05	115		120	1.40577e-05	125
	5		10		15		20		25		30		35		40	3.25829e-05	45	3.51013e-05	50		55		60	3.7568e-05	65		70		75		80		85		90		95		100	2.89733e-05	105		110	3.31473e-05	115		120	1.6159e-05	125
	5		10		15		20		25		30		35		40	2.49556e-05	45	3.51931e-05	50		55		60	4.83061e-05	65		70		75		80		85		90		95		100	2.28483e-05	105		110	2.01447e-05	115		120	1.65458e-05	125
	5		10		15		20		25		30		35		40	2.72332e-05	45	2.78312e-05	50		55		60	6.61755e-05	65		70		75		80		85		90		95		100	2.14473e-05	105		110	1.51591e-05	115		120	1.38056e-05	125
	5		10		15		20		25		30		35		40	3.44771e-05	45	3.58346e-05	50		55		60	3.4217e-05	65		70		75		80		85		90		95		100	3.08329e-05	105		110	1.39616e-05	115		120	1.44149e-05	125
	5		10		15		20		25		30		35		40	0.000112166	45	0.000373096	50		55		60	2.56932e-05	65		70		75		80		85		90		95		100	1.88467e-05	105		110	3.2539e-05	115		120	1.35485e-05	125
	5		10		15		20		25		30		35		40	3.25623e-05	45	0.000103852	50		55		60	4.0006e-05	65		70		75		80		85		90		95		100	3.26231e-05	105		110	2.888e-05	115		120	1.60214e-05	125
	5		10		15		20		25		30		35		40	4.34458e-05	45	2.72636e-05	50		55		60	2.72601e-05	65		70		75		80		85		90		95		100	5.37639e-05	105		110	1.90553e-05	115		120	2.55533e-05	125
	5		10		15		20		25		30		35		40	2.37195e-05	45	4.79967e-05	50		55		60	7.26448e-05	65		70		75		80		85		90		95		100	4.79159e-05	105		110	3.3712e-05	115		120	3.31413e-05	125
	5		10		15		20		25		30		35		40	3.96702e-05	45	4.98323e-05	50		55		60	2.56635e-05	65		70		75		80		85		90		95		100	5.4019e-05	105		110	1.21414e-05	115		120	0.000200303	125
	5		10		15		20		25		30		35		40	2.16577e-05	45	2.78512e-05	50		55		60	4.20237e-05	65		70		75		80		85		90		95		100	1.7905e-05	105		110	0.00365825	115		120	1.49275e-05	125
	5		10		15		20		25		30		35		40	5.91718e-05	45	3.43274e-05	50		55		60	4.35653e-05	65		70		75		80		85		90		95		100	3.56582e-05	105		110	0.00239306	115		120	1.42373e-05	125
	5		10		15		20		25		30		35		40	2.69404e-05	45	2.71725e-05	50		55		60	2.55206e-05	65		70		75		80		85		90		95		100	3.37828e-05	105		110	0.0019897	115		120	2.07253e-05	125
	5		10		15		20		25		30		35		40	2.81033e-05	45	3.28967e-05	50		55		60	3.35317e-05	65		70		75		80		85		90		95		100	0.00016421	105		110	5.95449e-05	115		120	1.9005e-05	125
	5		10		15		20		25		30		35		40	1.88102e-05	45	3.9764e-05	50		55		60	2.81758e-05	65		70		75		80		85		90		95		100	3.11296e-05	105		110	1.41784e-05	115		120	2.64897e-05	125
	5		10		15		20		25		30		35		40	1.82987e-05	45	4.27257e-05	50		55		60	4.02984e-05	65		70		75		80		85		90		95		100	2.53369e-05	105		110	2.73226e-05	115		120	1.85175e-05	125
	5		10		15		20		25		30		35		40	1.86108e-05	45	3.08897e-05	50		55		60	3.20292e-05	65		70		75		80		85		90		95		100	4.15396e-05	105		110	1.46598e-05	115		120	1.43837e-05	125
	5		10		15		20		25		30		35		40	6.98595e-05	45	2.66015e-05	50		55		60	2.79769e-05	65		70		75		80		85		90		95		100	2.04019e-05	105		110	1.3085e-05	115		120	0.000118158	125
	5		10		15		20		25		30		35		40	3.05759e-05	45	5.04837e-05	50		55		60	2.56432e-05	65		70		75		80		85		90		95		100	3.55439e-05	105		110	3.04743e-05	115		120	3.12979e-05	125
	5		10		15		20		25		30		35		40	1.96578e-05	45	3.24229e-05	50		55		60	3.10223e-05	65		70		75		80		85		90		95		100	1.73246e-05	105		110	4.59562e-05	115		120	2.13093e-05	125
	5		10		15		20		25		30		35		40	3.04342e-05	45	2.77925e-05	50		55		60	4.75773e-05	65		70		75		80		85		90		95		100	7.29942e-05	105		110	9.73574e-05	115		120	1.68392e-05	125
	5		10		15		20		25		30		35		40	2.7381e-05	45	3.6551e-05	50		55		60	5.95565e-05	65		70		75		80		85		90		95		100	3.6342e-05	105		110	1.40454e-05	115		120	1.58306e-05	125
	5		10		15		20		25		30		35		40	2.58669e-05	45	6.28588e-05	50		55		60	3.39381e-05	65		70		75		80		85		90		95		100	4.93478e-05	105		110	2.34677e-05	115		120	1.36368e-05	125
	5		10		15		20		25		30		35		40	0.000111687	45	3.16666e-05	50		55		60	6.6532e-05	65		70		75		80		85		90		95		100	2.64203e-05	105		110	2.20962e-05	115		120	1.56757e-05	125
	5		10		15		20		25		30		35		40	2.06458e-05	45	3.26615e-05	50		55		60	6.5592e-05	65		70		75		80		85		90		95		100	3.9899e-05	105		110	1.39474e-05	115		120	1.51105e-05	125
	5		10		15		20		25		30		35		40	6.00427e-05	45	2.97509e-05	50		55		60	2.97184e-05	65		70		75		80		85		90		95		100	1.92011e-05	105		110	2.85884e-05	115		120	0.000154902	125
	5		10		15		20		25		30		35		40	3.01516e-05	45	3.32988e-05	50		55		60	3.30655e-05	65		70		75		80		85		90		95		100	2.81163e-05	105		110	1.38465e-05	115		120	1.41289e-05	125
	5		10		15		20		25		30		35		40	6.5769e-05	45	0.000110917	50		55		60	3.44706e-05	65		70		75		80		85		90		95		100	1.93677e-05	105		110	7.89704e-05	115		120	1.80524e-05	125
	5		10		15		20		25		30		35		40	2.73671e-05	45	0.000115983	50		55		60	4.67234e-05	65		70		75		80		85		90		95		100	3.63954e-05	105		110	1.47725e-05	115		120	1.93549e-05	125
	5		10		15		20		25		30		35		40	2.92768e-05	45	3.13036e-05	50		55		60	2.91586e-05	65		70		75		80		85		90		95		100	3.39214e-05	105		110	2.53555e-05	115		120	1.3938e-05	125
	5		10		15		20		25		30		35		40	6.18931e-05	45	0.000110728	50		55		60	3.02462e-05	65		70		75		80		85		90		95		100	2.96988e-05	105		110	3.03695e-05	115		120	1.40398e-05	125
	5		10		15		20		25		30		35		40	2.28576e-05	45	2.98879e-05	50		55		60	6.20718e-05	65		70		75		80		85		90		95		100	4.53073e-05	105		110	3.73539e-05	115		120	1.68685e-05	125
	5		10		15		20		25		30		35		40	1.90123e-05	45	2.88936e-05	50		55		60	2.9135e-05	65		70		75		80		85		90		95		100	2.45011e-05	105		110	1.66548e-05	115		120	1.39336e-05	125
	5		10		15		20		25		30		35		40	3.13971e-05	45	3.24627e-05	50		55		60	4.87364e-05	65		70		75		80		85		90		95		100	0.000116711	105		110	2.58556e-05	115		120	1.37535e-05	125
	5		10		15		20		25		30		35		40	2.16164e-05	45	2.93651e-05	50		55		60	3.4378e-05	65		70		75		80		85		90		95		100	2.20951e-05	105		110	1.5369e-05	115		120	3.92284e-05	125
	5		10		15		20		25		30		35		40	3.7487e-05	45	2.93808e-05	50		55		60	3.04676e-05	65		70		75		80		85		90		95		100	1.90545e-05	105		110	2.99326e-05	115		120	3.19086e-05	125
	5		10		15		20		25		30		35		40	2.2214e-05	45	5.44215e-05	50		55		60	7.24529e-05	65		70		75		80		85		90		95		100	3.85784e-05	105		110	8.59635e-05	115		120	1.73303e-05	125
	5		10		15		20		25		30		35		40	6.57412e-05	45	2.80469e-05	50		55		60	0.000130781	65		70		75		80		85		90		95		100	2.05229e-05	105		110	9.49881e-05	115		120	1.7248e-05	125
	5		10		15		20		25		30		35		40	4.60453e-05	45	0.000103645	50		55		60	3.14017e-05	65		70		75		80		85		90		95		100	2.51989e-05	105		110	7.5491e-05	115		120	1.61106e-05	125
	5		10		15		20		25		30		35		40	5.28921e-05	45	0.000195632	50		55		60	2.55669e-05	65		70		75		80		85		90		95		100	2.52715e-05	105		110	7.9976e-05	115		120	1.7039e-05	125
	5		10		15		20		25		30		35		40	2.47564e-05	45	2.67154e-05	50		55		60	3.0933e-05	65		70		75		80		85		90		95		100	2.49304e-05	105		110	0.00607305	115		120	2.91689e-05	125
	5		10		15		20		25		30		35		40	2.11666e-05	45	3.70183e-05	50		55		60	3.18631e-05	65		70		75		80		85		90		95		100	1.98585e-05	105		110	1.66045e-05	115		120	2.09224e-05	125
	5		10		15		20		25		30		35		40	2.4539e-05	45	5.34007e-05	50		55		60	2.84933e-05	65		70		75		80		85		90		95		100	1.78099e-05	105		110	4.73296e-05	115		120	1.75838e-05	125
	5		10		15		20		25		30		35		40	2.04096e-05	45	3.77844e-05	50		55		60	2.89653e-05	65		70		75		80		85		90		95		100	2.25677e-05	105		110	2.35436e-05	115		120	1.70905e-05	125
	5		10		15		20		25		30		35		40	2.62753e-05	45	4.91378e-05	50		55		60	3.38059e-05	65		70		75		80		85		90		95		100	2.51164e-05	105		110	3.90899e-05	115		120	1.41823e-05	125
	5		10		15		20		25		30		35		40	2.12136e-05	45	5.2224e-05	50		55		60	4.34149e-05	65		70		75		80		85		90		95		100	2.41409e-05	105		110	2.11994e-05	115		120	1.42227e-05	125
	5		10		15		20		25		30		35		40	2.0574e-05	45	2.6787e-05	50		55		60	3.5671e-05	65		70		75		80		85		90		95		100	2.23933e-05	105		110	1.48594e-05	115		120	1.37383e-05	125
	5		10		15		20		25		30		35		40	1.89596e-05	45	4.34509e-05	50		55		60	3.39432e-05	65		70		75		80		85		90		95		100	2.48881e-05	105		110	3.31326e-05	115		120	0.000847626	125
	5		10		15		20		25		30		35		40	2.86568e-05	45	3.71177e-05	50		55		60	5.13425e-05	65		70		75		80		85		90		95		100	2.29391e-05	105		110	4.03378e-05	115		120	1.37938e-05	125
	5		10		15		20		25		30		35		40	1.80401e-05	45	2.76993e-05	50		55		60	4.16567e-05	65		70		75		80		85		90		95		100	1.72492e-05	105		110	2.05792e-05	115		120	2.15763e-05	125
	5		10		15		20		25		30		35		40	2.00208e-05	45	0.000279089	50		55		60	3.13536e-05	65		70		75		80		85		90		95		100	2.44998e-05	105		110	2.72704e-05	115		120	1.8293e-05	125
	5		10		15		20		25		30		35		40	6.79498e-05	45	3.88416e-05	50		55		60	2.81849e-05	65		70		75		80		85		90		95		100	2.5606e-05	105		110	6.68508e-05	115		120	1.40044e-05	125
	5		10		15		20		25		30		35		40	2.5108e-05	45	5.26519e-05	50		55		60	5.13946e-05	65		70		75		80		85		90		95		100	3.36887e-05	105		110	7.3724e-05	115		120	1.39628e-05	125
	5		10		15		20		25		30		35		40	4.1965e-05	45	3.55338e-05	50		55		60	3.31605e-05	65		70		75		80		85		90		95		100	2.12036e-05	105		110	1.24488e-05	115		120	2.01196e-05	125
	5		10		15		20		25		30		35		40	5.54514e-05	45	2.94116e-05	50		55		60	3.27954e-05	65		70		75		80		85		90		95		100	4.5472e-05	105		110	2.14057e-05	115		120	2.90962e-05	125
	5		10		15		20		25		30		35		40	2.48922e-05	45	3.14222e-05	50		55		60	2.51816e-05	65		70		75		80		85		90		95		100	2.31278e-05	105		110	3.48406e-05	115		120	1.86744e-05	125
	5		10		15		20		25		30		35		40	2.04541e-05	45	2.84852e-05	50		55		60	2.73607e-05	65		70		75		80		85		90		95		100	2.63641e-05	105		110	2.99532e-05	115		120	1.52932e-05	125
	5		10		15		20		25		30		35		40	1.9129e-05	45	2.80703e-05	50		55		60	2.66915e-05	65		70		75		80		85		90		95		100	4.28824e-05	105		110	2.00171e-05	115		120	2.01992e-05	125
	5		10		15		20		25		30		35		40	3.55162e-05	45	4.50445e-05	50		55		60	2.72904e-05	65		70		75		80		85		90		95		100	3.28837e-05	105		110	1.39251e-05	115		120	2.38722e-05	125
	5		10		15		20		25		30		35		40	2.00734e-05	45	3.1271e-05	50		55		60	3.27988e-05	65		70		75		80		85		90		95		100	1.76369e-05	105		110	4.66996e-05	115		120	2.46623e-05	125
	5		10		15		20		25		30		35		40	2.25176e-05	45	3.70232e-05	50		55		60	3.53097e-05	65		70		75		80		85		90		95		100	1.67783e-05	105		110	1.53235e-05	115		120	2.0318e-05	125
	5		10		15		20		25		30		35		40	3.90056e-05	45	6.79244e-05	50		55		60	2.90146e-05	65		70		75		80		85		90		95		100	2.58719e-05	105		110	1.84253e-05	115		120	1.37613e-05	125
	5		10		15		20		25		30		35		40	1.91994e-05	45	7.68172e-05	50		55		60	3.2617e-05	65		70		75		80		85		90		95		100	2.74322e-05	105		110	8.52554e-05	115		120	1.441e-05	125
	5		10		15		20		25		30		35		40	2.20115e-05	45	2.80084e-05	50		55		60	3.13449e-05	65		70		75		80		85		90		95		100	0.000167813	105		110	1.39519e-05	115		120	1.51845e-05	125
	5		10		15		20		25		30		35		40	0.000267701	45	2.67808e-05	50		55		60	4.00692e-05	65		70		75		80		85		90		95		100	2.08995e-05	105		110	1.77631e-05	115		120	1.52231e-05	125
	5		10		15		20		25		30		35		40	2.80371e-05	45	7.86393e-05	50		55		60	2.89653e-05	65		70		75		80		85		90		95		100	5.22956e-05	105		110	1.22526e-05	115		120	4.03882e-05	125
	5		10		15		20		25		30		35		40	2.77489e-05	45	4.52309e-05	50		55		60	2.64443e-05	65		70		75		80		85		90		95		100	1.7436e-05	105		110	1.26298e-05	115		120	4.23517e-05	125
	5		10		15		20		25		30		35		40	8.44048e-05	45	3.5213e-05	50		55		60	9.07821e-05	65		70		75		80		85		90		95		100	1.99898e-05	105		110	5.06566e-05	115		120	1.35839e-05	125
	5		10		15		20		25		30		35		40	2.12179e-05	45	3.51563e-05	50		55		60	3.03221e-05	65		70		75		80		85		90		95		100	2.56973e-05	105		110	2.27954e-05	115		120	1.7103e-05	125
	5		10		15		20		25		30		35		40	2.89109e-05	45	2.75452e-05	50		55		60	3.51499e-05	65		70		75		80		85		90		95		100	1.76421e-05	105		110	1.65696e-05	115		120	1.76586e-05	125
	5		10		15		20		25		30		35		40	2.03395e-05	45	2.96693e-05	50		55		60	2.70386e-05	65		70		75		80		85		90		95		100	3.44826e-05	105		110	1.80246e-05	115		120	1.48128e-05	125
	5		10		15		20		25		30		35		40	4.28717e-05	45	2.759e-05	50		55		60	4.19373e-05	65		70		75		80		85		90		95		100	1.78432e-05	105		110	5.2605e-05	115		120	1.58116e-05	125
	5		10		15		20		25		30		35		40	2.42899e-05	45	3.20039e-05	50		55		60	0.000202097	65		70		75		80		85		90		95		100	1.65038e-05	105		110	0.00010916	115		120	1.56313e-05	125
	5		10		15		20		25		30		35		40	2.28677e-05	45	2.70177e-05	50		55		60	2.58074e-05	65		70		75		80		85		90		95		100	2.16415e-05	105		110	5.39633e-05	115		120	1.36989e-05	125
	5		10		15		20		25		30		35		40	3.48613e-05	45	4.11403e-05	50		55		60	2.84373e-05	65		70		75		80		85		90		95		100	2.30464e-05	105		110	8.38627e-05	115		120	1.45502e-05	125
	5		10		15		20		25		30		35		40	2.44662e-05	45	3.25595e-05	50		55		60	7.18119e-05	65		70		75		80		85		90		95		100	3.26009e-05	105		110	2.29234e-05	115		120	1.91636e-05	125
	5		10		15		20		25		30		35		40	2.26343e-05	45	3.63534e-05	50		55		60	2.52779e-05	65		70		75		80		85		90		95		100	2.42917e-05	105		110	0.000130201	115		120	1.50247e-05	125
	5		10		15		20		25		30		35		40	2.10748e-05	45	2.96701e-05	50		55		60	3.43278e-05	65		70		75		80		85		90		95		100	3.38753e-05	105		110	0.000131807	115		120	1.83468e-05	125
	5		10		15		20		25		30		35		40	2.12357e-05	45	3.15605e-05	50		55		60	4.36558e-05	65		70		75		80		85		90		95		100	3.52322e-05	105		110	2.95973e-05	115		120	1.44633e-05	125
	5		10		15		20		25		30		35		40	7.89803e-05	45	3.22551e-05	50		55		60	7.45661e-05	65		70		75		80		85		90		95		100	1.73171e-05	105		110	1.25507e-05	115		120	1.52433e-05	125
	5		10		15		20		25		30		35		40	3.28562e-05	45	3.47195e-05	50		55		60	4.50118e-05	65		70		75		80		85		90		95		100	2.36651e-05	105		110	1.25917e-05	115		120	1.66233e-05	125
	5		10		15		20		25		30		35		40	1.81749e-05	45	3.40141e-05	50		55		60	4.15007e-05	65		70		75		80		85		90		95		100	3.10963e-05	105		110	2.33604e-05	115		120	1.4245e-05	125
	5		10		15		20		25		30		35		40	2.07059e-05	45	2.96691e-05	50		55		60	3.81964e-05	65		70		75		80		85		90		95		100	3.05838e-05	105		110	2.26046e-05	115		120	1.60487e-05	125
	5		10		15		20		25		30		35		40	0.00161009	45	3.94373e-05	50		55		60	4.41205e-05	65		70		75		80		85		90		95		100	3.18457e-05	105		110	1.76542e-05	115		120	4.67801e-05	125
	5		10		15		20		25		30		35		40	3.64634e-05	45	4.41385e-05	50		55		60	5.55556e-05	65		70		75		80		85		90		95		100	1.8728e-05	105		110	4.52919e-05	115		120	1.59963e-05	125
	5		10		15		20		25		30		35		40	1.9006e-05	45	2.81296e-05	50		55		60	4.95477e-05	65		70		75		80		85		90		95		100	1.85145e-05	105		110	1.45287e-05	115		120	0.000141491	125
	5		10		15		20		25		30		35		40	3.59002e-05	45	3.1301e-05	50		55		60	3.2052e-05	65		70		75		80		85		90		95		100	3.27414e-05	105		110	1.6152e-05	115		120	1.3664e-05	125
	5		10		15		20		25		30		35		40	2.75846e-05	45	3.451e-05	50		55		60	2.56143e-05	65		70		75		80		85		90		95		100	0.000263841	105		110	2.44033e-05	115		120	1.47677e-05	125
	5		10		15		20		25		30		35		40	2.64853e-05	45	3.19458e-05	50		55		60	3.08492e-05	65		70		75		80		85		90		95		100	0.000129164	105		110	0.000179231	115		120	1.8417e-05	125
	5		10		15		20		25		30		35		40	2.40935e-05	45	3.08044e-05	50		55		60	2.66235e-05	65		70		75		80		85		90		95		100	1.78339e-05	105		110	0.000106279	115		120	1.94593e-05	125
	5		10		15		20		25		30		35		40	2.696e-05	45	3.52581e-05	50		55		60	3.05202e-05	65		70		75		80		85		90		95		100	2.54987e-05	105		110	2.1093e-05	115		120	1.8572e-05	125
	5		10		15		20		25		30		35		40	2.40696e-05	45	2.80201e-05	50		55		60	2.94952e-05	65		70		75		80		85		90		95		100	1.81194e-05	105		110	0.000173763	115		120	1.40527e-05	125
	5		10		15		20		25		30		35		40	2.74671e-05	45	3.42297e-05	50		55		60	2.5367e-05	65		70		75		80		85		90		95		100	2.72518e-05	105		110	0.000161291	115		120	1.35143e-05	125
	5		10		15		20		25		30		35		40	2.5016e-05	45	5.65894e-05	50		55		60	2.58937e-05	65		70		75		80		85		90		95		100	1.93782e-05	105		110	0.000131899	115		120	1.53492e-05	125
	5		10		15		20		25		30		35		40	2.87074e-05	45	6.17371e-05	50		55		60	2.68929e-05	65		70		75		80		85		90		95		100	4.11142e-05	105		110	0.000103076	115		120	1.39408e-05	125
	5		10		15		20		25		30		35		40	1.8001e-05	45	2.69516e-05	50		55		60	2.90645e-05	65		70		75		80		85		90		95		100	2.22299e-05	105		110	0.000116751	115		120	1.85295e-05	125
	5		10		15		20		25		30		35		40	2.98119e-05	45	3.20922e-05	50		55		60	2.85006e-05	65		70		75		80		85		90		95		100	2.30361e-05	105		110	0.000123581	115		120	1.52238e-05	125
	5		10		15		20		25		30		35		40	2.22482e-05	45	3.25663e-05	50		55		60	4.96107e-05	65		70		75		80		85		90		95		100	2.49447e-05	105		110	9.38202e-05	115		120	1.44682e-05	125
	5		10		15		20		25		30		35		40	2.58701e-05	45	2.77486e-05	50		55		60	6.01502e-05	65		70		75		80		85		90		95		100	2.24423e-05	105		110	3.45762e-05	115		120	1.79328e-05	125
	5		10		15		20		25		30		35		40	2.52596e-05	45	2.71482e-05	50		55		60	2.5742e-05	65		70		75		80		85		90		95		100	2.64766e-05	105		110	0.000672465	115		120	1.99722e-05	125
	5		10		15		20		25		30		35		40	0.000764725	45	3.68113e-05	50		55		60	2.79786e-05	65		70		75		80		85		90		95		100	3.1631e-05	105		110	0.000308807	115		120	2.24374e-05	125
	5		10		15		20		25		30		35		40	2.98102e-05	45	2.77299e-05	50		55		60	6.16411e-05	65		70		75		80		85		90		95		100	2.21086e-05	105		110	0.0108964	115		120	1.40119e-05	125
	5		10		15		20		25		30		35		40	3.9559e-05	45	2.97643e-05	50		55		60	3.70008e-05	65		70		75		80		85		90		95		100	3.55321e-05	105		110	1.87348e-05	115		120	1.55092e-05	125
	5		10		15		20		25		30		35		40	3.86518e-05	45	2.68824e-05	50		55		60	2.6377e-05	65		70		75		80		85		90		95		100	1.97634e-05	105		110	1.38934e-05	115		120	1.57882e-05	125
	5		10		15		20		25		30		35		40	2.00472e-05	45	3.28424e-05	50		55		60	3.29369e-05	65		70		75		80		85		90		95		100	2.07181e-05	105		110	2.71285e-05	115		120	0.000125311	125
	5		10		15		20		25		30		35		40	3.90197e-05	45	4.51639e-05	50		55		60	2.72879e-05	65		70		75		80		85		90		95		100	2.47128e-05	105		110	2.04663e-05	115		120	1.43736e-05	125
	5		10		15		20		25		30		35		40	4.5498e-05	45	2.81441e-05	50		55		60	2.75823e-05	65		70		75		80		85		90		95		100	1.74123e-05	105		110	2.70566e-05	115		120	2.02991e-05	125
	5		10		15		20		25		30		35		40	2.7022e-05	45	5.95674e-05	50		55		60	7.79636e-05	65		70		75		80		85		90		95		100	3.13861e-05	105		110	1.22237e-05	115		120	1.87456e-05	125
	5		10		15		20		25		30		35		40	2.21376e-05	45	4.78064e-05	50		55		60	9.41741e-05	65		70		75		80		85		90		95		100	3.12813e-05	105		110	2.81554e-05	115		120	1.67409e-05	125
	5		10		15		20		25		30		35		40	2.39582e-05	45	5.75427e-05	50		55		60	2.74652e-05	65		70		75		80		85		90		95		100	2.17612e-05	105		110	1.20068e-05	115		120	1.43321e-05	125
	5		10		15		20		25		30		35		40	2.27411e-05	45	4.20093e-05	50		55		60	3.61491e-05	65		70		75		80		85		90		95		100	2.11881e-05	105		110	0.000164135	115		120	1.5343e-05	125
	5		10		15		20		25		30		35		40	1.80039e-05	45	2.71846e-05	50		55		60	2.97703e-05	65		70		75		80		85		90		95		100	3.24322e-05	105		110	6.3718e-05	115		120	1.76375e-05	125
	5		10		15		20		25		30		35		40	1.94244e-05	45	5.94118e-05	50		55		60	3.76424e-05	65		70		75		80		85		90		95		100	3.07236e-05	105		110	1.77821e-05	115		120	2.02642e-05	125
	5		10		15		20		25		30		35		40	3.51842e-05	45	3.73718e-05	50		55		60	4.17406e-05	65		70		75		80		85		90		95		100	3.54341e-05	105		110	2.62638e-05	115		120	1.65214e-05	125
	5		10		15		20		25		30		35		40	3.43004e-05	45	3.18268e-05	50		55		60	2.8106e-05	65		70		75		80		85		90		95		100	2.22606e-05	105		110	1.54957e-05	115		120	1.74376e-05	125
	5		10		15		20		25		30		35		40	1.89757e-05	45	4.67873e-05	50		55		60	5.8014e-05	65		70		75		80		85		90		95		100	2.00968e-05	105		110	7.21271e-05	115		120	2.18589e-05	125
	5		10		15		20		25		30		35		40	3.54868e-05	45	5.59606e-05	50		55		60	5.40979e-05	65		70		75		80		85		90		95		100	4.45433e-05	105		110	2.55695e-05	115		120	1.89049e-05	125
	5		10		15		20		25		30		35		40	3.79827e-05	45	2.98478e-05	50		55		60	3.84913e-05	65		70		75		80		85		90		95		100	2.21531e-05	105		110	5.91898e-05	115		120	3.64254e-05	125
	5		10		15		20		25		30		35		40	2.36301e-05	45	5.43087e-05	50		55		60	2.53809e-05	65		70		75		80		85		90		95		100	1.7264e-05	105		110	2.14049e-05	115		120	3.17149e-05	125
	5		10		15		20		25		30		35		40	5.24828e-05	45	3.17927e-05	50		55		60	3.73432e-05	65		70		75		80		85		90		95		100	2.80705e-05	105		110	1.31558e-05	115		120	3.21918e-05	125
	5		10		15		20		25		30		35		40	2.10802e-05	45	2.66152e-05	50		55		60	2.72783e-05	65		70		75		80		85		90		95		100	2.50446e-05	105		110	1.72458e-05	115		120	2.5461e-05	125
	5		10		15		20		25		30		35		40	2.06767e-05	45	2.96621e-05	50		55		60	3.24693e-05	65		70		75		80		85		90		95		100	2.23213e-05	105		110	4.68885e-05	115		120	1.64455e-05	125
	5		10		15		20		25		30		35		40	1.8802e-05	45	3.13709e-05	50		55		60	3.16648e-05	65		70		75		80		85		90		95		100	3.01587e-05	105		110	1.5842e-05	115		120	1.37035e-05	125
	5		10		15		20		25		30		35		40	3.2332e-05	45	2.85062e-05	50		55		60	4.25667e-05	65		70		75		80		85		90		95		100	3.08643e-05	105		110	3.02613e-05	115		120	1.36059e-05	125
	5		10		15		20		25		30		35		40	3.03084e-05	45	3.79431e-05	50		55		60	3.98995e-05	65		70		75		80		85		90		95		100	4.48957e-05	105		110	6.09939e-05	115		120	1.4209e-05	125
	5		10		15		20		25		30		35		40	1.93562e-05	45	2.75113e-05	50		55		60	6.45486e-05	65		70		75		80		85		90		95		100	3.73437e-05	105		110	1.4338e-05	115		120	1.86383e-05	125
	5		10		15		20		25		30		35		40	2.54722e-05	45	2.94238e-05	50		55		60	2.57865e-05	65		70		75		80		85		90		95		100	2.39736e-05	105		110	2.87487e-05	115		120	0.000107307	125
	5		10		15		20		25		30		35		40	3.92406e-05	45	3.61334e-05	50		55		60	2.76708e-05	65		70		75		80		85		90		95		100	2.78609e-05	105		110	2.62042e-05	115		120	9.424e-05	125
	5		10		15		20		25		30		35		40	0.000247294	45	2.70467e-05	50		55		60	2.81816e-05	65		70		75		80		85		90		95		100	2.85079e-05	105		110	8.92923e-05	115		120	1.37993e-05	125
	5		10		15		20		25		30		35		40	2.03968e-05	45	2.70986e-05	50		55		60	3.80798e-05	65		70		75		80		85		90		95		100	2.08872e-05	105		110	1.47336e-05	115		120	1.77839e-05	125
	5		10		15		20		25		30		35		40	1.90505e-05	45	2.83436e-05	50		55		60	4.18773e-05	65		70		75		80		85		90		95		100	2.11299e-05	105		110	3.65873e-05	115		120	1.77162e-05	125
	5		10		15		20		25		30		35		40	4.21182e-05	45	2.97375e-05	50		55		60	2.5194e-05	65		70		75		80		85		90		95		100	1.66113e-05	105		110	2.63403e-05	115		120	0.00018226	125
	5		10		15		20		25		30		35		40	3.12275e-05	45	4.33571e-05	50		55		60	0.000177368	65		70		75		80		85		90		95		100	4.12192e-05	105		110	3.20089e-05	115		120	1.8774e-05	125
	5		10		15		20		25		30		35		40	3.098e-05	45	5.13062e-05	50		55		60	5.28023e-05	65		70		75		80		85		90		95		100	2.09116e-05	105		110	1.54915e-05	115		120	1.45857e-05	125
	5		10		15		20		25		30		35		40	2.99012e-05	45	5.82651e-05	50		55		60	7.33689e-05	65		70		75		80		85		90		95		100	4.4292e-05	105		110	1.51479e-05	115		120	2.04474e-05	125
	5		10		15		20		25		30		35		40	1.86926e-05	45	3.25069e-05	50		55		60	7.59394e-05	65		70		75		80		85		90		95		100	3.54898e-05	105		110	2.71768e-05	115		120	1.40529e-05	125
	5		10		15		20		25		30		35		40	2.46444e-05	45	3.18782e-05	50		55		60	5.15923e-05	65		70		75		80		85		90		95		100	1.79568e-05	105		110	3.82702e-05	115		120	2.50741e-05	125
	5		10		15		20		25		30		35		40	2.09361e-05	45	8.4469e-05	50		55		60	5.2638e-05	65		70		75		80		85		90		95		100	2.39146e-05	105		110	1.56757e-05	115		120	2.05916e-05	125
	5		10		15		20		25		30		35		40	8.49453e-05	45	4.215e-05	50		55		60	4.34171e-05	65		70		75		80		85		90		95		100	3.69204e-05	105		110	4.38547e-05	115		120	2.0165e-05	125
	5		10		15		20		25		30		35		40	3.07153e-05	45	4.30028e-05	50		55		60	2.59991e-05	65		70		75		80		85		90		95		100	1.81172e-05	105		110	1.22107e-05	115		120	2.49978e-05	125
	5		10		15		20		25		30		35		40	2.73507e-05	45	3.96526e-05	50		55		60	2.60566e-05	65		70		75		80		85		90		95		100	2.35785e-05	105		110	5.00935e-05	115		120	1.38612e-05	125
	5		10		15		20		25		30		35		40	2.47635e-05	45	2.89222e-05	50		55		60	2.94454e-05	65		70		75		80		85		90		95		100	1.70492e-05	105		110	2.83419e-05	115		120	1.50393e-05	125
	5		10		15		20		25		30		35		40	1.97174e-05	45	2.67454e-05	50		55		60	2.81637e-05	65		70		75		80		85		90		95		100	1.69561e-05	105		110	2.76556e-05	115		120	1.60418e-05	125
	5		10		15		20		25		30		35		40	2.13729e-05	45	2.65142e-05	50		55		60	2.6925e-05	65		70		75		80		85		90		95		100	2.75194e-05	105		110	2.54423e-05	115		120	1.45707e-05	125
	5		10		15		20		25		30		35		40	0.00010189	45	3.89014e-05	50		55		60	2.94696e-05	65		70		75		80		85		90		95		100	6.41634e-05	105		110	2.27825e-05	115		120	1.42908e-05	125
	5		10		15		20		25		30		35		40	1.92873e-05	45	2.70008e-05	50		55		60	4.2643e-05	65		70		75		80		85		90		95		100	2.17255e-05	105		110	2.15666e-05	115		120	1.84308e-05	125
	5		10		15		20		25		30		35		40	1.83224e-05	45	0.000111819	50		55		60	6.33251e-05	65		70		75		80		85		90		95		100	2.20162e-05	105		110	3.64678e-05	115		120	1.66719e-05	125
	5		10		15		20		25		30		35		40	1.89116e-05	45	3.71628e-05	50		55		60	2.56054e-05	65		70		75		80		85		90		95		100	5.68751e-05	105		110	4.252e-05	115		120	1.99419e-05	125
	5		10		15		20		25		30		35		40	3.25031e-05	45	3.52022e-05	50		55		60	2.53273e-05	65		70		75		80		85		90		95		100	2.07258e-05	105		110	1.86427e-05	115		120	1.37619e-05	125
	5		10		15		20		25		30		35		40	2.45e-05	45	4.07969e-05	50		55		60	2.91643e-05	65		70		75		80		85		90		95		100	3.22101e-05	105		110	2.22785e-05	115		120	1.7391e-05	125
	5		10		15		20		25		30		35		40	3.30575e-05	45	3.81145e-05	50		55		60	3.74114e-05	65		70		75		80		85		90		95		100	1.93175e-05	105		110	1.97662e-05	115		120	1.80507e-05	125
	5		10		15		20		25		30		35		40	2.24499e-05	45	5.72322e-05	50		55		60	3.05814e-05	65		70		75		80		85		90		95		100	1.69651e-05	105		110	1.37501e-05	115		120	1.56891e-05	125
	5		10		15		20		25		30		35		40	2.23752e-05	45	2.93837e-05	50		55		60	3.69724e-05	65		70		75		80		85		90		95		100	1.97166e-05	105		110	1.61077e-05	115		120	1.36114e-05	125
	5		10		15		20		25		30		35		40	2.07088e-05	45	2.71372e-05	50		55		60	4.5941e-05	65		70		75		80		85		90		95		100	2.00937e-05	105		110	1.55234e-05	115		120	4.56831e-05	125
	5		10		15		20		25		30		35		40	2.27852e-05	45	2.7293e-05	50		55		60	3.93366e-05	65		70		75		80		85		90		95		100	3.39403e-05	105		110	3.45881e-05	115		120	1.83543e-05	125
	5		10		15		20		25		30		35		40	2.97383e-05	45	4.01634e-05	50		55		60	3.19845e-05	65		70		75		80		85		90		95		100	2.57846e-05	105		110	2.77513e-05	115		120	1.56801e-05	125
	5		10		15		20		25		30		35		40	2.73754e-05	45	4.06885e-05	50		55		60	5.14091e-05	65		70		75		80		85		90		95		100	3.69507e-05	105		110	1.63635e-05	115		120	1.73976e-05	125
	5		10		15		20		25		30		35		40	2.47932e-05	45	2.9341e-05	50		55		60	4.17752e-05	65		70		75		80		85		90		95		100	1.78663e-05	105		110	2.80928e-05	115		120	1.73996e-05	125
	5		10		15		20		25		30		35		40	2.38233e-05	45	2.81568e-05	50		55		60	2.9557e-05	65		70		75		80		85		90		95		100	2.43766e-05	105		110	2.44257e-05	115		120	1.40585e-05	125
	5		10		15		20		25		30		35		40	1.91847e-05	45	3.41184e-05	50		55		60	0.000168926	65		70		75		80		85		90		95		100	1.8069e-05	105		110	7.60868e-05	115		120	9.61727e-05	125
	5		10		15		20		25		30		35		40	2.28603e-05	45	3.56077e-05	50		55		60	5.21569e-05	65		70		75		80		85		90		95		100	1.80012e-05	105		110	1.6672e-05	115		120	9.52207e-05	125
	5		10		15		20		25		30		35		40	2.89591e-05	45	3.07475e-05	50		55		60	3.30086e-05	65		70		75		80		85		90		95		100	1.68908e-05	105		110	2.7912e-05	115		120	1.70922e-05	125
	5		10		15		20		25		30		35		40	3.47617e-05	45	2.89878e-05	50		55		60	2.50103e-05	65		70		75		80		85		90		95		100	2.27642e-05	105		110	2.216e-05	115		120	1.48111e-05	125
	5		10		15		20		25		30		35		40	0.000115235	45	2.66012e-05	50		55		60	3.42814e-05	65		70		75		80		85		90		95		100	2.01412e-05	105		110	2.0999e-05	115		120	1.88756e-05	125
	5		10		15		20		25		30		35		40	2.41891e-05	45	2.76024e-05	50		55		60	3.03887e-05	65		70		75		80		85		90		95		100	1.70271e-05	105		110	3.66618e-05	115		120	2.2098e-05	125
	5		10		15		20		25		30		35		40	3.24577e-05	45	4.08981e-05	50		55		60	3.73664e-05	65		70		75		80		85		90		95		100	2.11212e-05	105		110	0.000147378	115		120	1.83856e-05	125
	5		10		15		20		25		30		35		40	2.86058e-05	45	4.82592e-05	50		55		60	7.62858e-05	65		70		75		80		85		90		95		100	3.09242e-05	105		110	5.3147e-05	115		120	1.59764e-05	125
	5		10		15		20		25		30		35		40	1.93466e-05	45	3.7836e-05	50		55		60	8.29531e-05	65		70		75		80		85		90		95		100	2.37764e-05	105		110	1.84513e-05	115		120	1.47553e-05	125
	5		10		15		20		25		30		35		40	1.90621e-05	45	3.95963e-05	50		55		60	3.07521e-05	65		70		75		80		85		90		95		100	2.38895e-05	105		110	0.000101962	115		120	4.18885e-05	125
	5		10		15		20		25		30		35		40	2.33594e-05	45	3.00612e-05	50		55		60	2.96945e-05	65		70		75		80		85		90		95		100	2.91299e-05	105		110	3.41986e-05	115		120	4.52581e-05	125
	5		10		15		20		25		30		35		40	2.86242e-05	45	3.11796e-05	50		55		60	2.73606e-05	65		70		75		80		85		90		95		100	3.38265e-05	105		110	5.08267e-05	115		120	1.57765e-05	125
	5		10		15		20		25		30		35		40	5.5734e-05	45	3.85432e-05	50		55		60	3.63114e-05	65		70		75		80		85		90		95		100	2.1553e-05	105		110	9.65767e-05	115		120	1.61087e-05	125
	5		10		15		20		25		30		35		40	2.2238e-05	45	0.000113731	50		55		60	2.75292e-05	65		70		75		80		85		90		95		100	4.3248e-05	105		110	2.82269e-05	115		120	1.6224e-05	125
	5		10		15		20		25		30		35		40	3.06886e-05	45	3.22662e-05	50		55		60	2.67327e-05	65		70		75		80		85		90		95		100	5.15172e-05	105		110	1.70587e-05	115		120	2.70041e-05	125
	5		10		15		20		25		30		35		40	2.16374e-05	45	3.93579e-05	50		55		60	2.64867e-05	65		70		75		80		85		90		95		100	5.14353e-05	105		110	4.87804e-05	115		120	1.35105e-05	125
	5		10		15		20		25		30		35		40	3.49609e-05	45	4.14807e-05	50		55		60	3.76899e-05	65		70		75		80		85		90		95		100	2.4678e-05	105		110	4.33445e-05	115		120	1.64442e-05	125
	5		10		15		20		25		30		35		40	3.3295e-05	45	2.96742e-05	50		55		60	3.19275e-05	65		70		75		80		85		90		95		100	1.65452e-05	105		110	2.23479e-05	115		120	1.82118e-05	125
	5		10		15		20		25		30		35		40	2.85981e-05	45	3.00644e-05	50		55		60	5.01262e-05	65		70		75		80		85		90		95		100	1.75588e-05	105		110	2.73444e-05	115		120	1.51465e-05	125
	5		10		15		20		25		30		35		40	4.57206e-05	45	4.24802e-05	50		55		60	4.21202e-05	65		70		75		80		85		90		95		100	2.9353e-05	105		110	2.78039e-05	115		120	2.44493e-05	125
	5		10		15		20		25		30		35		40	0.000249515	45	3.37137e-05	50		55		60	2.90685e-05	65		70		75		80		85		90		95		100	1.8854e-05	105		110	4.17943e-05	115		120	1.59683e-05	125
	5		10		15		20		25		30		35		40	3.45147e-05	45	5.72237e-05	50		55		60	3.45116e-05	65		70		75		80		85		90		95		100	2.37527e-05	105		110	2.35653e-05	115		120	1.48671e-05	125
	5		10		15		20		25		30		35		40	3.96103e-05	45	4.99147e-05	50		55		60	3.66659e-05	65		70		75		80		85		90		95		100	1.89873e-05	105		110	0.00275452	115		120	1.59776e-05	125
	5		10		15		20		25		30		35		40	2.77559e-05	45	3.26601e-05	50		55		60	4.59275e-05	65		70		75		80		85		90		95		100	1.7076e-05	105		110	1.43332e-05	115		120	2.28339e-05	125
	5		10		15		20		25		30		35		40	3.69853e-05	45	3.32352e-05	50		55		60	3.07892e-05	65		70		75		80		85		90		95		100	2.5306e-05	105		110	2.28208e-05	115		120	1.92532e-05	125
	5		10		15		20		25		30		35		40	3.8478e-05	45	2.78168e-05	50		55		60	0.000291216	65		70		75		80		85		90		95		100	1.65937e-05	105		110	0.0161081	115		120	1.74712e-05	125
	5		10		15		20		25		30		35		40	2.14541e-05	45	3.47811e-05	50		55		60	2.99521e-05	65		70		75		80		85		90		95		100	4.36544e-05	105		110	1.29013e-05	115		120	1.37263e-05	125
	5		10		15		20		25		30		35		40	1.87114e-05	45	3.58771e-05	50		55		60	4.2079e-05	65		70		75		80		85		90		95		100	3.16223e-05	105		110	4.39722e-05	115		120	1.81351e-05	125
	5		10		15		20		25		30		35		40	2.88378e-05	45	3.28868e-05	50		55		60	5.2242e-05	65		70		75		80		85		90		95		100	1.98504e-05	105		110	3.04791e-05	115		120	2.39279e-05	125
	5		10		15		20		25		30		35		40	1.89694e-05	45	3.56436e-05	50		55		60	4.15517e-05	65		70		75		80		85		90		95		100	4.89057e-05	105		110	2.05051e-05	115		120	1.68309e-05	125
	5		10		15		20		25		30		35		40	1.87511e-05	45	3.01664e-05	50		55		60	9.10987e-05	65		70		75		80		85		90		95		100	3.87087e-05	105		110	3.34719e-05	115		120	1.4089e-05	125
	5		10		15		20		25		30		35		40	2.60549e-05	45	5.97826e-05	50		55		60	2.6965e-05	65		70		75		80		85		90		95		100	1.6596e-05	105		110	0.000147807	115		120	1.38351e-05	125
	5		10		15		20		25		30		35		40	2.16061e-05	45	3.40097e-05	50		55		60	4.34644e-05	65		70		75		80		85		90		95		100	2.88915e-05	105		110	1.53443e-05	115		120	1.63985e-05	125
	5		10		15		20		25		30		35		40	3.75572e-05	45	3.41242e-05	50		55		60	2.67633e-05	65		70		75		80		85		90		95		100	1.96191e-05	105		110	2.12711e-05	115		120	1.36138e-05	125
	5		10		15		20		25		30		35		40	4.48078e-05	45	3.29655e-05	50		55		60	3.40068e-05	65		70		75		80		85		90		95		100	2.52516e-05	105		110	5.18716e-05	115		120	1.37977e-05	125
	5		10		15		20		25		30		35		40	2.12358e-05	45	3.11001e-05	50		55		60	2.64748e-05	65		70		75		80		85		90		95		100	2.30733e-05	105		110	1.2573e-05	115		120	1.66092e-05	125
	5		10		15		20		25		30		35		40	9.79049e-05	45	3.46949e-05	50		55		60	4.71464e-05	65		70		75		80		85		90		95		100	1.89339e-05	105		110	3.19773e-05	115		120	1.40632e-05	125
	5		10		15		20		25		30		35		40	2.31348e-05	45	4.4152e-05	50		55		60	2.65783e-05	65		70		75		80		85		90		95		100	3.46622e-05	105		110	1.21627e-05	115		120	1.53522e-05	125
	5		10		15		20		25		30		35		40	2.274e-05	45	2.79144e-05	50		55		60	3.26213e-05	65		70		75		80		85		90		95		100	2.90766e-05	105		110	4.19539e-05	115		120	1.40665e-05	125
	5		10		15		20		25		30		35		40	4.4656e-05	45	4.47245e-05	50		55		60	3.12177e-05	65		70		75		80		85		90		95		100	2.94872e-05	105		110	6.34818e-05	115		120	1.89665e-05	125
	5		10		15		20		25		30		35		40	2.0226e-05	45	4.10409e-05	50		55		60	2.77346e-05	65		70		75		80		85		90		95		100	2.18307e-05	105		110	1.92142e-05	115		120	1.46705e-05	125
	5		10		15		20		25		30		35		40	3.67386e-05	45	2.7114e-05	50		55		60	2.61018e-05	65		70		75		80		85		90		95		100	2.72085e-05	105		110	2.64667e-05	115		120	1.4389e-05	125
	5		10		15		20		25		30		35		40	3.67601e-05	45	3.16402e-05	50		55		60	2.55138e-05	65		70		75		80		85		90		95		100	2.28886e-05	105		110	3.20744e-05	115		120	1.46206e-05	125
	5		10		15		20		25		30		35		40	4.0694e-05	45	3.31421e-05	50		55		60	3.00886e-05	65		70		75		80		85		90		95		100	1.82711e-05	105		110	1.73458e-05	115		120	1.51069e-05	125
	5		10		15		20		25		30		35		40	6.03744e-05	45	2.93971e-05	50		55		60	2.67339e-05	65		70		75		80		85		90		95		100	1.77786e-05	105		110	2.30374e-05	115		120	1.95545e-05	125
	5		10		15		20		25		30		35		40	3.48727e-05	45	3.40545e-05	50		55		60	4.48621e-05	65		70		75		80		85		90		95		100	2.09477e-05	105		110	6.49989e-05	115		120	1.59093e-05	125
	5		10		15		20		25		30		35		40	2.07913e-05	45	2.65328e-05	50		55		60	6.66742e-05	65		70		75		80		85		90		95		100	1.75581e-05	105		110	3.56496e-05	115		120	1.38049e-05	125
	5		10		15		20		25		30		35		40	2.09453e-05	45	2.77079e-05	50		55		60	3.1604e-05	65		70		75		80		85		90		95		100	1.74076e-05	105		110	5.17372e-05	115		120	1.473e-05	125
	5		10		15		20		25		30		35		40	1.82584e-05	45	4.24706e-05	50		55		60	5.53597e-05	65		70		75		80		85		90		95		100	3.4386e-05	105		110	1.81613e-05	115		120	1.36645e-05	125
	5		10		15		20		25		30		35		40	2.01295e-05	45	3.74906e-05	50		55		60	9.67177e-05	65		70		75		80		85		90		95		100	2.10245e-05	105		110	2.42667e-05	115		120	1.4726e-05	125
	5		10		15		20		25		30		35		40	2.68116e-05	45	2.97616e-05	50		55		60	4.62146e-05	65		70		75		80		85		90		95		100	1.84215e-05	105		110	2.35906e-05	115		120	2.43309e-05	125
	5		10		15		20		25		30		35		40	2.75742e-05	45	2.87252e-05	50		55		60	2.68297e-05	65		70		75		80		85		90		95		100	2.40225e-05	105		110	6.10326e-05	115		120	1.50566e-05	125
	5		10		15		20		25		30		35		40	3.76311e-05	45	4.11404e-05	50		55		60	3.76554e-05	65		70		75		80		85		90		95		100	2.61189e-05	105		110	1.71553e-05	115		120	3.80791e-05	125
	5		10		15		20		25		30		35		40	2.40272e-05	45	3.98873e-05	50		55		60	3.00843e-05	65		70		75		80		85		90		95		100	2.80818e-05	105		110	2.50504e-05	115		120	1.80896e-05	125
	5		10		15		20		25		30		35		40	2.80138e-05	45	2.83102e-05	50		55		60	3.1653e-05	65		70		75		80		85		90		95		100	2.36223e-05	105		110	2.26556e-05	115		120	1.43092e-05	125
	5		10		15		20		25		30		35		40	3.65732e-05	45	2.88396e-05	50		55		60	2.91493e-05	65		70		75		80		85		90		95		100	2.02639e-05	105		110	2.56296e-05	115		120	1.9392e-05	125
	5		10		15		20		25		30		35		40	1.87032e-05	45	2.9732e-05	50		55		60	3.55524e-05	65		70		75		80		85		90		95		100	1.6689e-05	105		110	2.08928e-05	115		120	0.000102044	125
	5		10		15		20		25		30		35		40	2.05208e-05	45	2.82427e-05	50		55		60	3.59343e-05	65		70		75		80		85		90		95		100	2.16985e-05	105		110	1.98784e-05	115		120	0.000100996	125
	5		10		15		20		25		30		35		40	0.000247902	45	2.9782e-05	50		55		60	4.54547e-05	65		70		75		80		85		90		95		100	1.72552e-05	105		110	1.8969e-05	115		120	1.45427e-05	125
	5		10		15		20		25		30		35		40	2.43466e-05	45	3.14701e-05	50		55		60	2.58998e-05	65		70		75		80		85		90		95		100	3.47896e-05	105		110	1.3968e-05	115		120	1.61609e-05	125
	5		10		15		20		25		30		35		40	1.90401e-05	45		50		55		60	3.29714e-05	65		70		75		80		85		90		95		100	2.44802e-05	105		110	1.8077e-05	115		120	1.53162e-05	125
	5		10		15		20		25		30		35		40	2.00019e-05	45		50		55		60	4.39171e-05	65		70		75		80		85		90		95		100	3.30674e-05	105		110	1.5873e-05	115		120	2.2018e-05	125
	5		10		15		20		25		30		35		40	5.22969e-05	45		50		55		60	4.70219e-05	65		70		75		80		85		90		95		100	2.7388e-05	105		110	1.7673e-05	115		120	1.43924e-05	125
	5		10		15		20		25		30		35		40	5.35847e-05	45		50		55		60	3.49592e-05	65		70		75		80		85		90		95		100	1.82434e-05	105		110	3.6344e-05	115		120	1.42114e-05	125
	5		10		15		20		25		30		35		40	2.98341e-05	45		50		55		60	3.7129e-05	65		70		75		80		85		90		95		100	2.10364e-05	105		110	3.86212e-05	115		120	1.84352e-05	125
	5		10		15		20		25		30		35		40	2.77685e-05	45		50		55		60	2.71384e-05	65		70		75		80		85		90		95		100	2.84192e-05	105		110	3.61694e-05	115		120	2.01568e-05	125
	5		10		15		20		25		30		35		40	2.01528e-05	45		50		55		60	3.62298e-05	65		70		75		80		85		90		95		100	1.66337e-05	105		110	2.69068e-05	115		120	1.87746e-05	125
	5		10		15		20		25		30		35		40	1.88628e-05	45		50		55		60	7.00118e-05	65		70		75		80		85		90		95		100	2.40257e-05	105		110	6.8108e-05	115		120	3.78428e-05	125
	5		10		15		20		25		30		35		40	3.23731e-05	45		50		55		60	3.19112e-05	65		70		75		80		85		90		95		100	1.87498e-05	105		110	2.02517e-05	115		120	1.65338e-05	125
	5		10		15		20		25		30		35		40	5.96378e-05	45		50		55		60	3.66329e-05	65		70		75		80		85		90		95		100	2.40155e-05	105		110	2.00522e-05	115		120	1.44409e-05	125
	5		10		15		20		25		30		35		40	3.32936e-05	45		50		55		60	8.83749e-05	65		70		75		80		85		90		95		100	9.48277e-05	105		110	1.75533e-05	115		120	1.38173e-05	125
	5		10		15		20		25		30		35		40	3.17072e-05	45		50		55		60	3.17695e-05	65		70		75		80		85		90		95		100	2.00098e-05	105		110	4.94905e-05	115		120	1.86794e-05	125
	5		10		15		20		25		30		35		40	4.69223e-05	45		50		55		60	3.04048e-05	65		70		75		80		85		90		95		100	2.29692e-05	105		110	0.000148577	115		120	1.49126e-05	125
	5		10		15		20		25		30		35		40	3.03094e-05	45		50		55		60	3.33839e-05	65		70		75		80		85		90		95		100	2.20957e-05	105		110	1.79636e-05	115		120	1.80353e-05	125
	5		10		15		20		25		30		35		40	3.44895e-05	45		50		55		60	3.78222e-05	65		70		75		80		85		90		95		100	2.45734e-05	105		110	2.89278e-05	115		120	1.70859e-05	125
	5		10		15		20		25		30		35		40	2.20012e-05	45		50		55		60	2.50082e-05	65		70		75		80		85		90		95		100	4.56687e-05	105		110	2.8342e-05	115		120	0.000115647	125
	5		10		15		20		25		30		35		40	4.56418e-05	45		50		55		60	2.91715e-05	65		70		75		80		85		90		95		100	1.73796e-05	105		110	3.64608e-05	115		120	1.36114e-05	125
	5		10		15		20		25		30		35		40	4.73988e-05	45		50		55		60	2.98001e-05	65		70		75		80		85		90		95		100	2.21786e-05	105		110	2.85603e-05	115		120	1.92018e-05	125
	5		10		15		20		25		30		35		40	2.78423e-05	45		50		55		60	2.58848e-05	65		70		75		80		85		90		95		100	2.34135e-05	105		110	1.60152e-05	115		120	1.42688e-05	125
	5		10		15		20		25		30		35		40	3.34082e-05	45		50		55		60	2.86959e-05	65		70		75		80		85		90		95		100	1.83736e-05	105		110	2.32136e-05	115		120	1.77826e-05	125
	5		10		15		20		25		30		35		40	3.82414e-05	45		50		55		60	3.45118e-05	65		70		75		80		85		90		95		100	2.46528e-05	105		110	1.37824e-05	115		120	1.63692e-05	125
	5		10		15		20		25		30		35		40	4.15603e-05	45		50		55		60	3.83076e-05	65		70		75		80		85		90		95		100	1.98214e-05	105		110	3.26702e-05	115		120	2.60166e-05	125
	5		10		15		20		25		30		35		40	2.14093e-05	45		50		55		60	4.84569e-05	65		70		75		80		85		90		95		100	1.79936e-05	105		110	3.38584e-05	115		120	3.72778e-05	125
	5		10		15		20		25		30		35		40	2.3843e-05	45		50		55		60	3.92166e-05	65		70		75		80		85		90		95		100	2.98084e-05	105		110	2.34325e-05	115		120	1.35871e-05	125
	5		10		15		20		25		30		35		40	2.24628e-05	45		50		55		60	3.50034e-05	65		70		75		80		85		90		95		100	2.34059e-05	105		110	2.14691e-05	115		120	1.65643e-05	125
	5		10		15		20		25		30		35		40	1.82305e-05	45		50		55		60	2.83235e-05	65		70		75		80		85		90		95		100	3.20781e-05	105		110	2.28164e-05	115		120	1.41022e-05	125
	5		10		15		20		25		30		35		40	2.69731e-05	45		50		55		60	4.06835e-05	65		70		75		80		85		90		95		100	1.7894e-05	105		110	1.39766e-05	115		120	1.65518e-05	125
	5		10		15		20		25		30		35		40	7.00014e-05	45		50		55		60	3.89864e-05	65		70		75		80		85		90		95		100	2.17879e-05	105		110	7.77397e-05	115		120	3.27635e-05	125
	5		10		15		20		25		30		35		40	3.70336e-05	45		50		55		60	6.11241e-05	65		70		75		80		85		90		95		100	1.82772e-05	105		110	5.32943e-05	115		120	1.42144e-05	125
	5		10		15		20		25		30		35		40	2.91161e-05	45		50		55		60	5.21376e-05	65		70		75		80		85		90		95		100	6.95701e-05	105		110	1.55429e-05	115		120	1.69374e-05	125
	5		10		15		20		25		30		35		40	2.30193e-05	45		50		55		60	2.81017e-05	65		70		75		80		85		90		95		100	1.69694e-05	105		110	1.4141e-05	115		120	1.42459e-05	125
	5		10		15		20		25		30		35		40	4.05041e-05	45		50		55		60	3.92777e-05	65		70		75		80		85		90		95		100	2.65883e-05	105		110	6.42026e-05	115		120	1.35517e-05	125
	5		10		15		20		25		30		35		40	2.24088e-05	45		50		55		60	3.22769e-05	65		70		75		80		85		90		95		100	2.94751e-05	105		110	2.64452e-05	115		120	1.66071e-05	125
	5		10		15		20		25		30		35		40	2.83852e-05	45		50		55		60	4.30269e-05	65		70		75		80		85		90		95		100	2.02653e-05	105		110	7.80836e-05	115		120	1.73811e-05	125
	5		10		15		20		25		30		35		40	1.91989e-05	45		50		55		60	4.78358e-05	65		70		75		80		85		90		95		100	2.24891e-05	105		110	1.98679e-05	115		120	1.37559e-05	125
	5		10		15		20		25		30		35		40	2.73092e-05	45		50		55		60	2.65077e-05	65		70		75		80		85		90		95		100	2.69726e-05	105		110	1.9494e-05	115		120	1.37267e-05	125
	5		10		15		20		25		30		35		40	4.45051e-05	45		50		55		60	3.16745e-05	65		70		75		80		85		90		95		100	3.01969e-05	105		110	1.61633e-05	115		120	1.56849e-05	125
	5		10		15		20		25		30		35		40	2.71869e-05	45		50		55		60	5.61762e-05	65		70		75		80		85		90		95		100	1.81855e-05	105		110	4.76308e-05	115		120	1.58922e-05	125
	5		10		15		20		25		30		35		40	1.95745e-05	45		50		55		60	3.08675e-05	65		70		75		80		85		90		95		100	1.97428e-05	105		110	1.55475e-05	115		120	1.60299e-05	125
	5		10		15		20		25		30		35		40	2.61192e-05	45		50		55		60	2.99133e-05	65		70		75		80		85		90		95		100	2.01284e-05	105		110	1.2367e-05	115		120	0.00342642	125
	5		10		15		20		25		30		35		40	1.87703e-05	45		50		55		60	4.56527e-05	65		70		75		80		85		90		95		100	1.68853e-05	105		110	4.78575e-05	115		120	1.53756e-05	125
	5		10		15		20		25		30		35		40	6.06776e-05	45		50		55		60	5.7899e-05	65		70		75		80		85		90		95		100	2.56585e-05	105		110	1.25563e-05	115		120	1.50359e-05	125
	5		10		15		20		25		30		35		40	2.41122e-05	45		50		55		60	4.68381e-05	65		70		75		80		85		90		95		100	2.72696e-05	105		110	3.09762e-05	115		120	1.38229e-05	125
	5		10		15		20		25		30		35		40	1.87824e-05	45		50		55		60	2.57463e-05	65		70		75		80		85		90		95		100	1.98314e-05	105		110	1.26357e-05	115		120	1.53304e-05	125
	5		10		15		20		25		30		35		40	2.38197e-05	45		50		55		60	3.24192e-05	65		70		75		80		85		90		95		100	2.98287e-05	105		110	1.96915e-05	115		120	1.78556e-05	125
	5		10		15		20		25		30		35		40	2.40084e-05	45		50		55		60	3.71872e-05	65		70		75		80		85		90		95		100	3.48067e-05	105		110	3.74609e-05	115		120	1.66836e-05	125
	5		10		15		20		25		30		35		40	2.6577e-05	45		50		55		60	2.50822e-05	65		70		75		80		85		90		95		100	2.76348e-05	105		110	2.70841e-05	115		120	1.3698e-05	125
	5		10		15		20		25		30		35		40	5.40313e-05	45		50		55		60	3.16162e-05	65		70		75		80		85		90		95		100	2.14944e-05	105		110	2.40558e-05	115		120	1.55933e-05	125
	5		10		15		20		25		30		35		40	7.75345e-05	45		50		55		60	3.95545e-05	65		70		75		80		85		90		95		100	4.12987e-05	105		110	1.39077e-05	115		120	1.49598e-05	125
	5		10		15		20		25		30		35		40	2.64422e-05	45		50		55		60	2.95647e-05	65		70		75		80		85		90		95		100	0.000101288	105		110	4.63576e-05	115		120	1.51303e-05	125
	5		10		15		20		25		30		35		40	6.35614e-05	45		50		55		60	2.90416e-05	65		70		75		80		85		90		95		100	1.9358e-05	105		110	1.6974e-05	115		120	1.57897e-05	125
	5		10		15		20		25		30		35		40	3.89364e-05	45		50		55		60	2.78259e-05	65		70		75		80		85		90		95		100	1.89516e-05	105		110	3.67332e-05	115		120	1.86664e-05	125
	5		10		15		20		25		30		35		40	1.80909e-05	45		50		55		60	2.90727e-05	65		70		75		80		85		90		95		100	4.91348e-05	105		110	2.25019e-05	115		120	2.0525e-05	125
	5		10		15		20		25		30		35		40	1.9603e-05	45		50		55		60	2.52361e-05	65		70		75		80		85		90		95		100	2.34095e-05	105		110	1.37968e-05	115		120	1.37203e-05	125
	5		10		15		20		25		30		35		40	2.72023e-05	45		50		55		60	2.94555e-05	65		70		75		80		85		90		95		100	4.50251e-05	105		110	1.57176e-05	115		120	9.03985e-05	125
	5		10		15		20		25		30		35		40	2.57532e-05	45		50		55		60	3.61771e-05	65		70		75		80		85		90		95		100	1.95795e-05	105		110	5.16461e-05	115		120	1.36347e-05	125
	5		10		15		20		25		30		35		40	2.40163e-05	45		50		55		60	2.68454e-05	65		70		75		80		85		90		95		100	2.58392e-05	105		110	5.50494e-05	115		120	2.09802e-05	125
	5		10		15		20		25		30		35		40	2.86956e-05	45		50		55		60	2.87928e-05	65		70		75		80		85		90		95		100	1.74166e-05	105		110	3.67947e-05	115		120	1.54346e-05	125
	5		10		15		20		25		30		35		40	2.41555e-05	45		50		55		60	2.84455e-05	65		70		75		80		85		90		95		100	2.55347e-05	105		110	3.99794e-05	115		120	0.000150335	125
	5		10		15		20		25		30		35		40	2.41061e-05	45		50		55		60	2.56062e-05	65		70		75		80		85		90		95		100	2.33023e-05	105		110	1.21268e-05	115		120	2.12432e-05	125
	5		10		15		20		25		30		35		40	5.17363e-05	45		50		55		60	2.74593e-05	65		70		75		80		85		90		95		100	2.28008e-05	105		110	1.73024e-05	115		120	1.45206e-05	125
	5		10		15		20		25		30		35		40	2.11683e-05	45		50		55		60	3.31075e-05	65		70		75		80		85		90		95		100	2.35675e-05	105		110	4.61821e-05	115		120	1.61547e-05	125
	5		10		15		20		25		30		35		40	3.33675e-05	45		50		55		60	3.63192e-05	65		70		75		80		85		90		95		100	2.66428e-05	105		110	1.28811e-05	115		120	1.45244e-05	125
	5		10		15		20		25		30		35		40	3.65148e-05	45		50		55		60	3.98663e-05	65		70		75		80		85		90		95		100	2.685e-05	105		110	1.38791e-05	115		120	2.41149e-05	125
	5		10		15		20		25		30		35		40	2.50282e-05	45		50		55		60	4.41605e-05	65		70		75		80		85		90		95		100	5.96349e-05	105		110	2.55975e-05	115		120	2.12252e-05	125
	5		10		15		20		25		30		35		40	2.27937e-05	45		50		55		60	2.52823e-05	65		70		75		80		85		90		95		100	2.22026e-05	105		110	4.83455e-05	115		120	8.64716e-05	125
	5		10		15		20		25		30		35		40	5.12531e-05	45		50		55		60	3.48234e-05	65		70		75		80		85		90		95		100	2.55122e-05	105		110	3.99018e-05	115		120	9.24162e-05	125
	5		10		15		20		25		30		35		40	2.46807e-05	45		50		55		60	3.18669e-05	65		70		75		80		85		90		95		100	2.75121e-05	105		110	4.30701e-05	115		120	1.41303e-05	125
	5		10		15		20		25		30		35		40	2.41246e-05	45		50		55		60	2.735e-05	65		70		75		80		85		90		95		100	3.48356e-05	105		110	1.65191e-05	115		120	2.18398e-05	125
	5		10		15		20		25		30		35		40	2.21622e-05	45		50		55		60	2.88039e-05	65		70		75		80		85		90		95		100	4.22998e-05	105		110	3.88879e-05	115		120	1.52856e-05	125
	5		10		15		20		25		30		35		40	6.1303e-05	45		50		55		60	3.81989e-05	65		70		75		80		85		90		95		100	3.40892e-05	105		110	5.10632e-05	115		120	1.69867e-05	125
	5		10		15		20		25		30		35		40	3.97267e-05	45		50		55		60	3.44834e-05	65		70		75		80		85		90		95		100	1.85879e-05	105		110	1.89378e-05	115		120	8.46529e-05	125
	5		10		15		20		25		30		35		40	4.68145e-05	45		50		55		60	8.33978e-05	65		70		75		80		85		90		95		100	2.82979e-05	105		110	2.42684e-05	115		120	1.65177e-05	125
	5		10		15		20		25		30		35		40	2.48645e-05	45		50		55		60	3.47249e-05	65		70		75		80		85		90		95		100	3.93505e-05	105		110	2.95845e-05	115		120	1.36174e-05	125
	5		10		15		20		25		30		35		40	2.30906e-05	45		50		55		60	3.31308e-05	65		70		75		80		85		90		95		100	1.83094e-05	105		110	3.63455e-05	115		120	1.55076e-05	125
	5		10		15		20		25		30		35		40	2.49546e-05	45		50		55		60	3.38436e-05	65		70		75		80		85		90		95		100	2.49296e-05	105		110	6.81603e-05	115		120	1.39095e-05	125
	5		10		15		20		25		30		35		40	3.95369e-05	45		50		55		60	2.82537e-05	65		70		75		80		85		90		95		100	2.59743e-05	105		110	2.30378e-05	115		120	2.15021e-05	125
	5		10		15		20		25		30		35		40	4.0103e-05	45		50		55		60	4.23393e-05	65		70		75		80		85		90		95		100	2.05982e-05	105		110	3.10113e-05	115		120	2.03164e-05	125
	5		10		15		20		25		30		35		40	2.5105e-05	45		50		55		60	3.37297e-05	65		70		75		80		85		90		95		100	1.82391e-05	105		110	8.45056e-05	115		120	1.72285e-05	125
	5		10		15		20		25		30		35		40	5.04616e-05	45		50		55		60	2.55078e-05	65		70		75		80		85		90		95		100	1.68551e-05	105		110	3.19116e-05	115		120	1.39631e-05	125
	5		10		15		20		25		30		35		40	5.67872e-05	45		50		55		60	2.69235e-05	65		70		75		80		85		90		95		100	1.92404e-05	105		110	1.86325e-05	115		120	1.76514e-05	125
	5		10		15		20		25		30		35		40	7.76172e-05	45		50		55		60	2.57004e-05	65		70		75		80		85		90		95		100	2.00027e-05	105		110	6.2301e-05	115		120	1.81546e-05	125
	5		10		15		20		25		30		35		40	2.62186e-05	45		50		55		60	3.93856e-05	65		70		75		80		85		90		95		100	1.78306e-05	105		110	1.79067e-05	115		120	2.12511e-05	125
	5		10		15		20		25		30		35		40	4.11105e-05	45		50		55		60	2.91815e-05	65		70		75		80		85		90		95		100	2.22351e-05	105		110	2.13676e-05	115		120	4.78149e-05	125
	5		10		15		20		25		30		35		40	4.95514e-05	45		50		55		60	2.72765e-05	65		70		75		80		85		90		95		100	2.49939e-05	105		110	3.17774e-05	115		120	6.83366e-05	125
	5		10		15		20		25		30		35		40	4.49905e-05	45		50		55		60	5.05422e-05	65		70		75		80		85		90		95		100	2.89089e-05	105		110	2.55297e-05	115		120	1.43673e-05	125
	5		10		15		20		25		30		35		40	5.67736e-05	45		50		55		60	2.54331e-05	65		70		75		80		85		90		95		100	1.99052e-05	105		110	4.53174e-05	115		120	1.96141e-05	125
	5		10		15		20		25		30		35		40	2.05713e-05	45		50		55		60	2.62308e-05	65		70		75		80		85		90		95		100	4.01218e-05	105		110	2.55815e-05	115		120	1.68933e-05	125
	5		10		15		20		25		30		35		40	3.78102e-05	45		50		55		60	2.59065e-05	65		70		75		80		85		90		95		100	2.02737e-05	105		110	1.91627e-05	115		120	1.91732e-05	125
	5		10		15		20		25		30		35		40	2.81268e-05	45		50		55		60	3.31464e-05	65		70		75		80		85		90		95		100	3.00339e-05	105		110	3.67824e-05	115		120	1.91521e-05	125
	5		10		15		20		25		30		35		40	2.35706e-05	45		50		55		60	4.45247e-05	65		70		75		80		85		90		95		100	2.72913e-05	105		110	1.49434e-05	115		120	2.14297e-05	125
	5		10		15		20		25		30		35		40	7.081e-05	45		50		55		60	4.5145e-05	65		70		75		80		85		90		95		100	2.32019e-05	105		110	5.4965e-05	115		120	1.5922e-05	125
	5		10		15		20		25		30		35		40	2.11991e-05	45		50		55		60	2.58185e-05	65		70		75		80		85		90		95		100	2.08107e-05	105		110	2.15916e-05	115		120	1.53671e-05	125
	5		10		15		20		25		30		35		40	2.25135e-05	45		50		55		60	3.23727e-05	65		70		75		80		85		90		95		100	1.86454e-05	105		110	6.50822e-05	115		120	1.74769e-05	125
	5		10		15		20		25		30		35		40	2.52251e-05	45		50		55		60	2.74475e-05	65		70		75		80		85		90		95		100	1.65361e-05	105		110	1.59506e-05	115		120	1.66394e-05	125
	5		10		15		20		25		30		35		40	1.80544e-05	45		50		55		60	5.37901e-05	65		70		75		80		85		90		95		100	2.34179e-05	105		110	3.77279e-05	115		120	3.74607e-05	125
	5		10		15		20		25		30		35		40	5.05261e-05	45		50		55		60	2.56369e-05	65		70		75		80		85		90		95		100	4.56928e-05	105		110	3.7875e-05	115		120	3.16544e-05	125
	5		10		15		20		25		30		35		40	2.21936e-05	45		50		55		60	3.00639e-05	65		70		75		80		85		90		95		100	2.54254e-05	105		110	2.06113e-05	115		120	1.42415e-05	125
	5		10		15		20		25		30		35		40	2.6468e-05	45		50		55		60	2.68541e-05	65		70		75		80		85		90		95		100	4.38715e-05	105		110	2.40761e-05	115		120	1.81264e-05	125
	5		10		15		20		25		30		35		40	2.12343e-05	45		50		55		60	3.73817e-05	65		70		75		80		85		90		95		100	3.09657e-05	105		110	1.81916e-05	115		120	1.76014e-05	125
	5		10		15		20		25		30		35		40	2.24485e-05	45		50		55		60	4.43954e-05	65		70		75		80		85		90		95		100	4.00257e-05	105		110	1.95944e-05	115		120	1.60666e-05	125
	5		10		15		20		25		30		35		40	2.75241e-05	45		50		55		60	4.78519e-05	65		70		75		80		85		90		95		100	2.51214e-05	105		110	2.42683e-05	115		120	1.5432e-05	125
	5		10		15		20		25		30		35		40	1.94978e-05	45		50		55		60	3.3338e-05	65		70		75		80		85		90		95		100	2.93674e-05	105		110	1.75219e-05	115		120	1.62385e-05	125
	5		10		15		20		25		30		35		40	2.00968e-05	45		50		55		60	2.89444e-05	65		70		75		80		85		90		95		100	2.12493e-05	105		110	5.84598e-05	115		120	1.5707e-05	125
	5		10		15		20		25		30		35		40	1.81191e-05	45		50		55		60	5.35785e-05	65		70		75		80		85		90		95		100	2.78748e-05	105		110	2.14439e-05	115		120	1.39187e-05	125
	5		10		15		20		25		30		35		40	1.95713e-05	45		50		55		60	3.9815e-05	65		70		75		80		85		90		95		100	2.63538e-05	105		110	3.03697e-05	115		120	1.74535e-05	125
	5		10		15		20		25		30		35		40	2.88113e-05	45		50		55		60	3.50252e-05	65		70		75		80		85		90		95		100	2.20563e-05	105		110	2.93376e-05	115		120	5.60598e-05	125
	5		10		15		20		25		30		35		40	2.14311e-05	45		50		55		60	3.28854e-05	65		70		75		80		85		90		95		100	1.77284e-05	105		110	1.77588e-05	115		120	6.88338e-05	125
	5		10		15		20		25		30		35		40	3.78616e-05	45		50		55		60	3.25561e-05	65		70		75		80		85		90		95		100	2.13211e-05	105		110	2.88897e-05	115		120	3.4654e-05	125
	5		10		15		20		25		30		35		40	3.13345e-05	45		50		55		60	2.67664e-05	65		70		75		80		85		90		95		100	3.5367e-05	105		110	5.4652e-05	115		120	1.66122e-05	125
	5		10		15		20		25		30		35		40	2.68402e-05	45		50		55		60	0.000188227	65		70		75		80		85		90		95		100	5.2705e-05	105		110	4.65664e-05	115		120	1.58568e-05	125
	5		10		15		20		25		30		35		40	2.46424e-05	45		50		55		60	3.84031e-05	65		70		75		80		85		90		95		100	4.03243e-05	105		110	1.61628e-05	115		120	1.43121e-05	125
	5		10		15		20		25		30		35		40	6.12497e-05	45		50		55		60	3.80246e-05	65		70		75		80		85		90		95		100	2.46142e-05	105		110	1.85e-05	115		120	1.87791e-05	125
	5		10		15		20		25		30		35		40	1.90196e-05	45		50		55		60	2.59705e-05	65		70		75		80		85		90		95		100	1.84155e-05	105		110	1.80417e-05	115		120	1.62431e-05	125
	5		10		15		20		25		30		35		40	1.99689e-05	45		50		55		60	0.000128716	65		70		75		80		85		90		95		100	2.93261e-05	105		110	2.17981e-05	115		120	1.70638e-05	125
	5		10		15		20		25		30		35		40	3.89042e-05	45		50		55		60	0.00026632	65		70		75		80		85		90		95		100	2.07297e-05	105		110	5.10724e-05	115		120	1.4897e-05	125
	5		10		15		20		25		30		35		40	6.41506e-05	45		50		55		60	7.34703e-05	65		70		75		80		85		90		95		100	2.13557e-05	105		110	7.72198e-05	115		120	1.52129e-05	125
	5		10		15		20		25		30		35		40	3.10997e-05	45		50		55		60	2.84126e-05	65		70		75		80		85		90		95		100	2.47311e-05	105		110	2.74465e-05	115		120	1.65776e-05	125
	5		10		15		20		25		30		35		40	2.11455e-05	45		50		55		60	3.66284e-05	65		70		75		80		85		90		95		100	1.74526e-05	105		110	1.6738e-05	115		120	1.58648e-05	125
	5		10		15		20		25		30		35		40	3.13768e-05	45		50		55		60	3.28599e-05	65		70		75		80		85		90		95		100	2.13453e-05	105		110	4.17678e-05	115		120	1.89948e-05	125
	5		10		15		20		25		30		35		40	2.37197e-05	45		50		55		60	3.34516e-05	65		70		75		80		85		90		95		100	1.65577e-05	105		110	2.98151e-05	115		120	1.74398e-05	125
	5		10		15		20		25		30		35		40	3.28607e-05	45		50		55		60	3.13367e-05	65		70		75		80		85		90		95		100	2.47457e-05	105		110	5.08448e-05	115		120	1.47999e-05	125
	5		10		15		20		25		30		35		40	3.28264e-05	45		50		55		60	2.62359e-05	65		70		75		80		85		90		95		100	2.05016e-05	105		110	1.89484e-05	115		120	1.49449e-05	125
	5		10		15		20		25		30		35		40	5.10625e-05	45		50		55		60	2.80398e-05	65		70		75		80		85		90		95		100	7.70176e-05	105		110	4.2091e-05	115		120	1.77042e-05	125
	5		10		15		20		25		30		35		40	1.88357e-05	45		50		55		60	4.48531e-05	65		70		75		80		85		90		95		100	4.30889e-05	105		110	1.72628e-05	115		120	1.52215e-05	125
	5		10		15		20		25		30		35		40	2.02525e-05	45		50		55		60	2.89988e-05	65		70		75		80		85		90		95		100	2.35323e-05	105		110	1.80236e-05	115		120	1.96576e-05	125
	5		10		15		20		25		30		35		40	6.37961e-05	45		50		55		60	3.27957e-05	65		70		75		80		85		90		95		100	2.62322e-05	105		110	1.72821e-05	115		120	2.25807e-05	125
	5		10		15		20		25		30		35		40	4.01838e-05	45		50		55		60	4.49607e-05	65		70		75		80		85		90		95		100	2.2771e-05	105		110	1.20841e-05	115		120	1.43227e-05	125
	5		10		15		20		25		30		35		40	3.21541e-05	45		50		55		60	4.30721e-05	65		70		75		80		85		90		95		100	4.89202e-05	105		110	5.4222e-05	115		120	1.90653e-05	125
	5		10		15		20		25		30		35		40	3.61908e-05	45		50		55		60	3.20087e-05	65		70		75		80		85		90		95		100	2.30097e-05	105		110	3.48975e-05	115		120	1.7407e-05	125
	5		10		15		20		25		30		35		40	2.83378e-05	45		50		55		60	2.69927e-05	65		70		75		80		85		90		95		100	1.8994e-05	105		110	2.89021e-05	115		120	1.48206e-05	125
	5		10		15		20		25		30		35		40	3.98051e-05	45		50		55		60	2.92303e-05	65		70		75		80		85		90		95		100	1.93636e-05	105		110	7.97535e-05	115		120	3.06098e-05	125
	5		10		15		20		25		30		35		40	4.67529e-05	45		50		55		60	2.99109e-05	65		70		75		80		85		90		95		100	2.23432e-05	105		110	1.35886e-05	115		120	2.15196e-05	125
	5		10		15		20		25		30		35		40	3.12193e-05	45		50		55		60	3.16431e-05	65		70		75		80		85		90		95		100	1.84671e-05	105		110	1.54598e-05	115		120	1.38767e-05	125
	5		10		15		20		25		30		35		40	2.55765e-05	45		50		55		60	2.78123e-05	65		70		75		80		85		90		95		100	2.51207e-05	105		110	3.20627e-05	115		120	1.44739e-05	125
	5		10		15		20		25		30		35		40	2.05453e-05	45		50		55		60	2.54619e-05	65		70		75		80		85		90		95		100	2.89562e-05	105		110	2.71616e-05	115		120	1.4039e-05	125
	5		10		15		20		25		30		35		40	3.56769e-05	45		50		55		60	3.43422e-05	65		70		75		80		85		90		95		100	2.3851e-05	105		110	2.11551e-05	115		120	1.52993e-05	125
	5		10		15		20		25		30		35		40	3.54364e-05	45		50		55		60	3.3298e-05	65		70		75		80		85		90		95		100	1.79876e-05	105		110	0.000126884	115		120	2.66067e-05	125
	5		10		15		20		25		30		35		40	2.40745e-05	45		50		55		60	4.55208e-05	65		70		75		80		85		90		95		100	3.42395e-05	105		110	2.38776e-05	115		120	2.22753e-05	125
	5		10		15		20		25		30		35		40	3.45255e-05	45		50		55		60	3.34105e-05	65		70		75		80		85		90		95		100	3.05649e-05	105		110	1.94917e-05	115		120	2.23468e-05	125
	5		10		15		20		25		30		35		40	2.6518e-05	45		50		55		60	2.62694e-05	65		70		75		80		85		90		95		100	2.73346e-05	105		110	1.8722e-05	115		120	1.54293e-05	125
	5		10		15		20		25		30		35		40	1.91652e-05	45		50		55		60	4.49926e-05	65		70		75		80		85		90		95		100	3.99868e-05	105		110	1.868e-05	115		120	1.95491e-05	125
	5		10		15		20		25		30		35		40	2.86826e-05	45		50		55		60	2.5086e-05	65		70		75		80		85		90		95		100	6.88345e-05	105		110	2.32266e-05	115		120	1.76374e-05	125
	5		10		15		20		25		30		35		40	4.00517e-05	45		50		55		60	2.68094e-05	65		70		75		80		85		90		95		100	2.37505e-05	105		110	5.0741e-05	115		120	1.49791e-05	125
	5		10		15		20		25		30		35		40	3.55158e-05	45		50		55		60	8.17285e-05	65		70		75		80		85		90		95		100	2.47565e-05	105		110	4.16889e-05	115		120	4.06154e-05	125
	5		10		15		20		25		30		35		40	2.16977e-05	45		50		55		60	2.72106e-05	65		70		75		80		85		90		95		100	1.76011e-05	105		110	3.02542e-05	115		120	5.1663e-05	125
	5		10		15		20		25		30		35		40	2.06367e-05	45		50		55		60	9.80094e-05	65		70		75		80		85		90		95		100	3.63172e-05	105		110	3.85142e-05	115		120	1.64123e-05	125
	5		10		15		20		25		30		35		40	2.88032e-05	45		50		55		60	5.78409e-05	65		70		75		80		85		90		95		100	4.32371e-05	105		110	2.20872e-05	115		120	1.53476e-05	125
	5		10		15		20		25		30		35		40	2.41344e-05	45		50		55		60	2.98603e-05	65		70		75		80		85		90		95		100	2.94066e-05	105		110	1.41567e-05	115		120	1.48969e-05	125
	5		10		15		20		25		30		35		40	4.40011e-05	45		50		55		60	3.2702e-05	65		70		75		80		85		90		95		100	4.06383e-05	105		110	3.44873e-05	115		120	1.44104e-05	125
	5		10		15		20		25		30		35		40	1.87069e-05	45		50		55		60	3.17675e-05	65		70		75		80		85		90		95		100	3.04766e-05	105		110	2.66895e-05	115		120	2.82627e-05	125
	5		10		15		20		25		30		35		40	4.52261e-05	45		50		55		60	4.58839e-05	65		70		75		80		85		90		95		100	1.69295e-05	105		110	1.32545e-05	115		120	3.92259e-05	125
	5		10		15		20		25		30		35		40	3.4804e-05	45		50		55		60	2.74099e-05	65		70		75		80		85		90		95		100	2.875e-05	105		110	2.04171e-05	115		120	0.000140434	125
	5		10		15		20		25		30		35		40	3.25605e-05	45		50		55		60	2.50646e-05	65		70		75		80		85		90		95		100	2.68324e-05	105		110	0.000138151	115		120	7.55862e-05	125
	5		10		15		20		25		30		35		40	2.35652e-05	45		50		55		60	2.82678e-05	65		70		75		80		85		90		95		100	2.30929e-05	105		110	2.61655e-05	115		120	1.42715e-05	125
	5		10		15		20		25		30		35		40	2.45496e-05	45		50		55		60	8.88396e-05	65		70		75		80		85		90		95		100	4.62813e-05	105		110	6.568e-05	115		120	1.45401e-05	125
	5		10		15		20		25		30		35		40	4.09505e-05	45		50		55		60	3.18147e-05	65		70		75		80		85		90		95		100	6.00729e-05	105		110	8.13626e-05	115		120	1.68382e-05	125
	5		10		15		20		25		30		35		40	2.84493e-05	45		50		55		60	5.53035e-05	65		70		75		80		85		90		95		100	1.98321e-05	105		110	3.82461e-05	115		120	2.02931e-05	125
	5		10		15		20		25		30		35		40	4.37479e-05	45		50		55		60	7.73967e-05	65		70		75		80		85		90		95		100	2.63356e-05	105		110	2.82299e-05	115		120	2.03458e-05	125
	5		10		15		20		25		30		35		40	2.1637e-05	45		50		55		60	2.80936e-05	65		70		75		80		85		90		95		100	2.83677e-05	105		110	1.25093e-05	115		120	1.51316e-05	125
	5		10		15		20		25		30		35		40	2.91237e-05	45		50		55		60	3.02771e-05	65		70		75		80		85		90		95		100	2.02514e-05	105		110	7.11729e-05	115		120	1.50388e-05	125
	5		10		15		20		25		30		35		40	3.76916e-05	45		50		55		60	5.08278e-05	65		70		75		80		85		90		95		100	2.63606e-05	105		110	1.30306e-05	115		120	1.58349e-05	125
	5		10		15		20		25		30		35		40	4.43457e-05	45		50		55		60	3.22757e-05	65		70		75		80		85		90		95		100	1.72339e-05	105		110	1.63804e-05	115		120	1.40997e-05	125
	5		10		15		20		25		30		35		40	2.44014e-05	45		50		55		60	2.61307e-05	65		70		75		80		85		90		95		100	1.95047e-05	105		110	4.18617e-05	115		120	2.00992e-05	125
	5		10		15		20		25		30		35		40	0.000120259	45		50		55		60	3.0468e-05	65		70		75		80		85		90		95		100	2.30122e-05	105		110	3.43477e-05	115		120	2.15372e-05	125
	5		10		15		20		25		30		35		40	2.23061e-05	45		50		55		60	2.8395e-05	65		70		75		80		85		90		95		100	1.7547e-05	105		110	1.45522e-05	115		120	1.41486e-05	125
	5		10		15		20		25		30		35		40	2.43121e-05	45		50		55		60	2.70734e-05	65		70		75		80		85		90		95		100	2.01663e-05	105		110	1.31138e-05	115		120	2.24928e-05	125
	5		10		15		20		25		30		35		40	6.94024e-05	45		50		55		60	3.3821e-05	65		70		75		80		85		90		95		100	3.64966e-05	105		110	3.48316e-05	115		120	1.62744e-05	125
	5		10		15		20		25		30		35		40	2.69664e-05	45		50		55		60	3.19723e-05	65		70		75		80		85		90		95		100	1.99269e-05	105		110	1.33426e-05	115		120	1.86857e-05	125
	5		10		15		20		25		30		35		40	4.29088e-05	45		50		55		60	4.03534e-05	65		70		75		80		85		90		95		100	1.90977e-05	105		110	3.47804e-05	115		120	1.56779e-05	125
	5		10		15		20		25		30		35		40	4.00984e-05	45		50		55		60	2.72255e-05	65		70		75		80		85		90		95		100	1.93011e-05	105		110	1.59076e-05	115		120	1.71348e-05	125
	5		10		15		20		25		30		35		40	3.02474e-05	45		50		55		60	5.47731e-05	65		70		75		80		85		90		95		100	1.75251e-05	105		110	8.04353e-05	115		120	1.62569e-05	125
	5		10		15		20		25		30		35		40	3.78749e-05	45		50		55		60	3.27906e-05	65		70		75		80		85		90		95		100	1.7439e-05	105		110	1.68827e-05	115		120	1.4098e-05	125
	5		10		15		20		25		30		35		40	3.47385e-05	45		50		55		60	3.23077e-05	65		70		75		80		85		90		95		100	2.35892e-05	105		110	2.14421e-05	115		120	3.22823e-05	125
	5		10		15		20		25		30		35		40	3.04101e-05	45		50		55		60	2.84001e-05	65		70		75		80		85		90		95		100	1.78228e-05	105		110	8.71536e-05	115		120	1.60501e-05	125
	5		10		15		20		25		30		35		40	2.2018e-05	45		50		55		60	5.73547e-05	65		70		75		80		85		90		95		100	1.776e-05	105		110	2.39916e-05	115		120	1.78608e-05	125
	5		10		15		20		25		30		35		40	2.69374e-05	45		50		55		60	3.21548e-05	65		70		75		80		85		90		95		100	2.13861e-05	105		110	1.73263e-05	115		120	1.44111e-05	125
	5		10		15		20		25		30		35		40	3.33322e-05	45		50		55		60	3.88223e-05	65		70		75		80		85		90		95		100	2.04105e-05	105		110	3.44873e-05	115		120	1.91137e-05	125
	5		10		15		20		25		30		35		40	2.15572e-05	45		50		55		60	5.23386e-05	65		70		75		80		85		90		95		100	4.95204e-05	105		110	3.64242e-05	115		120	1.74167e-05	125
	5		10		15		20		25		30		35		40	3.95939e-05	45		50		55		60	3.4141e-05	65		70		75		80		85		90		95		100	2.27416e-05	105		110	4.49395e-05	115		120	1.45065e-05	125
	5		10		15		20		25		30		35		40	2.03508e-05	45		50		55		60	2.68843e-05	65		70		75		80		85		90		95		100	1.76019e-05	105		110	1.58479e-05	115		120	2.25867e-05	125
	5		10		15		20		25		30		35		40	0.000206628	45		50		55		60	4.16016e-05	65		70		75		80		85		90		95		100	1.86347e-05	105		110	6.62493e-05	115		120	1.78159e-05	125
	5		10		15		20		25		30		35		40	3.68244e-05	45		50		55		60	3.96124e-05	65		70		75		80		85		90		95		100	1.8334e-05	105		110	2.34521e-05	115		120	2.13302e-05	125
	5		10		15		20		25		30		35		40	0.000117248	45		50		55		60	4.14735e-05	65		70		75		80		85		90		95		100	1.74805e-05	105		110	3.05578e-05	115		120	1.63208e-05	125
	5		10		15		20		25		30		35		40	2.87528e-05	45		50		55		60	4.85351e-05	65		70		75		80		85		90		95		100	3.25781e-05	105		110	7.28343e-05	115		120	1.3747e-05	125
	5		10		15		20		25		30		35		40	2.01001e-05	45		50		55		60	6.26076e-05	65		70		75		80		85		90		95		100	2.34937e-05	105		110	4.83179e-05	115		120	1.44048e-05	125
	5		10		15		20		25		30		35		40	3.69694e-05	45		50		55		60	2.71864e-05	65		70		75		80		85		90		95		100	8.27109e-05	105		110	1.28938e-05	115		120	1.57782e-05	125
	5		10		15		20		25		30		35		40	2.74131e-05	45		50		55		60	2.6625e-05	65		70		75		80		85		90		95		100	3.73156e-05	105		110	4.68976e-05	115		120	1.72067e-05	125
	5		10		15		20		25		30		35		40	5.35501e-05	45		50		55		60	8.28078e-05	65		70		75		80		85		90		95		100	3.55194e-05	105		110	4.2348e-05	115		120	1.48186e-05	125
	5		10		15		20		25		30		35		40	2.33621e-05	45		50		55		60	3.92054e-05	65		70		75		80		85		90		95		100	3.01904e-05	105		110	5.08514e-05	115		120	1.6074e-05	125
	5		10		15		20		25		30		35		40	5.64924e-05	45		50		55		60	5.93596e-05	65		70		75		80		85		90		95		100	1.73149e-05	105		110	5.6771e-05	115		120	1.37274e-05	125
	5		10		15		20		25		30		35		40	2.21815e-05	45		50		55		60	6.41202e-05	65		70		75		80		85		90		95		100	3.22094e-05	105		110	1.27955e-05	115		120	2.25148e-05	125
	5		10		15		20		25		30		35		40	4.11497e-05	45		50		55		60	2.66861e-05	65		70		75		80		85		90		95		100	3.06347e-05	105		110	1.98073e-05	115		120	1.83326e-05	125
	5		10		15		20		25		30		35		40	4.37854e-05	45		50		55		60	4.00864e-05	65		70		75		80		85		90		95		100	2.10686e-05	105		110	1.29263e-05	115		120	1.46678e-05	125
	5		10		15		20		25		30		35		40	2.60176e-05	45		50		55		60	2.66838e-05	65		70		75		80		85		90		95		100	2.2791e-05	105		110	2.91561e-05	115		120	1.49765e-05	125
	5		10		15		20		25		30		35		40	3.97714e-05	45		50		55		60	2.73166e-05	65		70		75		80		85		90		95		100	1.85866e-05	105		110	1.62889e-05	115		120	8.81393e-05	125
	5		10		15		20		25		30		35		40	1.91466e-05	45		50		55		60	2.6487e-05	65		70		75		80		85		90		95		100	2.81715e-05	105		110	2.43469e-05	115		120	1.64967e-05	125
	5		10		15		20		25		30		35		40	2.23382e-05	45		50		55		60	3.50194e-05	65		70		75		80		85		90		95		100	2.94472e-05	105		110	2.92105e-05	115		120	1.43282e-05	125
	5		10		15		20		25		30		35		40	2.68391e-05	45		50		55		60	6.94066e-05	65		70		75		80		85		90		95		100	1.95737e-05	105		110	1.4531e-05	115		120	1.47759e-05	125
	5		10		15		20		25		30		35		40	2.9709e-05	45		50		55		60	2.62523e-05	65		70		75		80		85		90		95		100	2.7637e-05	105		110	1.8709e-05	115		120	1.4958e-05	125
	5		10		15		20		25		30		35		40	2.76133e-05	45		50		55		60	3.79374e-05	65		70		75		80		85		90		95		100	3.74202e-05	105		110	1.5763e-05	115		120	1.51584e-05	125
	5		10		15		20		25		30		35		40	2.05053e-05	45		50		55		60	3.09471e-05	65		70		75		80		85		90		95		100	8.6984e-05	105		110	2.39865e-05	115		120	2.14058e-05	125
	5		10		15		20		25		30		35		40	2.46983e-05	45		50		55		60	2.7252e-05	65		70		75		80		85		90		95		100	1.66972e-05	105		110	5.08286e-05	115		120	7.51533e-05	125
	5		10		15		20		25		30		35		40	2.99803e-05	45		50		55		60	2.63386e-05	65		70		75		80		85		90		95		100	2.01188e-05	105		110	8.21481e-05	115		120	7.31859e-05	125
	5		10		15		20		25		30		35		40	2.79232e-05	45		50		55		60	6.01395e-05	65		70		75		80		85		90		95		100	2.46562e-05	105		110	3.68957e-05	115		120	1.36468e-05	125
	5		10		15		20		25		30		35		40	2.91108e-05	45		50		55		60	2.57876e-05	65		70		75		80		85		90		95		100	1.72812e-05	105		110	1.58832e-05	115		120	1.70488e-05	125
	5		10		15		20		25		30		35		40	2.30303e-05	45		50		55		60	3.09163e-05	65		70		75		80		85		90		95		100	1.88482e-05	105		110	1.80243e-05	115		120	1.42521e-05	125
	5		10		15		20		25		30		35		40	2.14564e-05	45		50		55		60	5.44875e-05	65		70		75		80		85		90		95		100	2.00366e-05	105		110	5.8112e-05	115		120	1.35217e-05	125
	5		10		15		20		25		30		35		40	3.04966e-05	45		50		55		60	4.87648e-05	65		70		75		80		85		90		95		100	2.1562e-05	105		110	4.56234e-05	115		120	1.62768e-05	125
	5		10		15		20		25		30		35		40	3.02687e-05	45		50		55		60	4.80593e-05	65		70		75		80		85		90		95		100	3.36667e-05	105		110	2.47131e-05	115		120	1.4371e-05	125
	5		10		15		20		25		30		35		40	1.89624e-05	45		50		55		60	2.55223e-05	65		70		75		80		85		90		95		100	2.79337e-05	105		110	1.72494e-05	115		120	1.80134e-05	125
	5		10		15		20		25		30		35		40	8.52807e-05	45		50		55		60	3.67299e-05	65		70		75		80		85		90		95		100	2.35171e-05	105		110	4.37606e-05	115		120	1.70408e-05	125
	5		10		15		20		25		30		35		40	2.34089e-05	45		50		55		60	3.87901e-05	65		70		75		80		85		90		95		100	2.7958e-05	105		110	4.6968e-05	115		120	2.29814e-05	125
	5		10		15		20		25		30		35		40	2.54966e-05	45		50		55		60	5.50592e-05	65		70		75		80		85		90		95		100	2.35114e-05	105		110	0.000124164	115		120	1.35581e-05	125
	5		10		15		20		25		30		35		40	2.99258e-05	45		50		55		60	2.53138e-05	65		70		75		80		85		90		95		100	4.33455e-05	105		110	2.04812e-05	115		120	1.36138e-05	125
	5		10		15		20		25		30		35		40	6.52563e-05	45		50		55		60	2.67552e-05	65		70		75		80		85		90		95		100	5.79795e-05	105		110	7.28791e-05	115		120	1.68259e-05	125
	5		10		15		20		25		30		35		40	2.56432e-05	45		50		55		60	3.81546e-05	65		70		75		80		85		90		95		100	7.57733e-05	105		110	1.93805e-05	115		120	1.42367e-05	125
	5		10		15		20		25		30		35		40	2.9787e-05	45		50		55		60	2.97146e-05	65		70		75		80		85		90		95		100	2.51945e-05	105		110	5.11573e-05	115		120	1.76376e-05	125
	5		10		15		20		25		30		35		40	2.18572e-05	45		50		55		60		65		70		75		80		85		90		95		100	2.2477e-05	105		110	1.53283e-05	115		120	2.96919e-05	125
	5		10		15		20		25		30		35		40	2.14754e-05	45		50		55		60		65		70		75		80		85		90		95		100	3.13825e-05	105		110	4.08073e-05	115		120	1.77846e-05	125
	5		10		15		20		25		30		35		40	3.09815e-05	45		50		55		60		65		70		75		80		85		90		95		100	1.72327e-05	105		110	3.6763e-05	115		120	1.93911e-05	125
	5		10		15		20		25		30		35		40	1.9757e-05	45		50		55		60		65		70		75		80		85		90		95		100	2.25456e-05	105		110	7.58118e-05	115		120	1.62374e-05	125
	5		10		15		20		25		30		35		40	3.34723e-05	45		50		55		60		65		70		75		80		85		90		95		100	2.21845e-05	105		110	1.67848e-05	115		120	1.39356e-05	125
	5		10		15		20		25		30		35		40	2.23764e-05	45		50		55		60		65		70		75		80		85		90		95		100	2.93422e-05	105		110	4.39309e-05	115		120	1.70251e-05	125
	5		10		15		20		25		30		35		40	2.67648e-05	45		50		55		60		65		70		75		80		85		90		95		100	2.00726e-05	105		110	1.94162e-05	115		120	1.37692e-05	125
	5		10		15		20		25		30		35		40	2.21294e-05	45		50		55		60		65		70		75		80		85		90		95		100	2.81169e-05	105		110	2.01571e-05	115		120	5.2601e-05	125
	5		10		15		20		25		30		35		40	5.27077e-05	45		50		55		60		65		70		75		80		85		90		95		100	2.32804e-05	105		110	1.88889e-05	115		120	1.74083e-05	125
	5		10		15		20		25		30		35		40	1.82724e-05	45		50		55		60		65		70		75		80		85		90		95		100	4.52438e-05	105		110	1.55517e-05	115		120	1.46992e-05	125
	5		10		15		20		25		30		35		40	0.000225898	45		50		55		60		65		70		75		80		85		90		95		100	4.6297e-05	105		110	1.42951e-05	115		120	1.40242e-05	125
	5		10		15		20		25		30		35		40	2.92256e-05	45		50		55		60		65		70		75		80		85		90		95		100	1.70951e-05	105		110	1.401e-05	115		120	1.41254e-05	125
	5		10		15		20		25		30		35		40	2.95882e-05	45		50		55		60		65		70		75		80		85		90		95		100	4.03984e-05	105		110	1.58053e-05	115		120	1.60074e-05	125
	5		10		15		20		25		30		35		40	6.20036e-05	45		50		55		60		65		70		75		80		85		90		95		100	1.71905e-05	105		110	1.68107e-05	115		120	1.57365e-05	125
	5		10		15		20		25		30		35		40	6.17578e-05	45		50		55		60		65		70		75		80		85		90		95		100	0.000145816	105		110	1.85855e-05	115		120		125
	5		10		15		20		25		30		35		40	2.45484e-05	45		50		55		60		65		70		75		80		85		90		95		100	2.49428e-05	105		110	1.25512e-05	115		120		125
	5		10		15		20		25		30		35		40	2.25397e-05	45		50		55		60		65		70		75		80		85		90		95		100	3.82091e-05	105		110	3.88487e-05	115		120		125
	5		10		15		20		25		30		35		40	1.96764e-05	45		50		55		60		65		70		75		80		85		90		95		100	2.66518e-05	105		110	4.2162e-05	115		120		125
	5		10		15		20		25		30		35		40	3.70296e-05	45		50		55		60		65		70		75		80		85		90		95		100	5.87015e-05	105		110	2.05426e-05	115		120		125
	5		10		15		20		25		30		35		40	3.69076e-05	45		50		55		60		65		70		75		80		85		90		95		100	1.88604e-05	105		110	3.70901e-05	115		120		125
	5		10		15		20		25		30		35		40	4.58096e-05	45		50		55		60		65		70		75		80		85		90		95		100	2.38941e-05	105		110	2.18621e-05	115		120		125
	5		10		15		20		25		30		35		40	2.9471e-05	45		50		55		60		65		70		75		80		85		90		95		100	1.80433e-05	105		110	1.49961e-05	115		120		125
	5		10		15		20		25		30		35		40	4.78712e-05	45		50		55		60		65		70		75		80		85		90		95		100	2.25151e-05	105		110	4.93862e-05	115		120		125
	5		10		15		20		25		30		35		40	3.64352e-05	45		50		55		60		65		70		75		80		85		90		95		100	2.00163e-05	105		110	3.83574e-05	115		120		125
	5		10		15		20		25		30		35		40	1.96729e-05	45		50		55		60		65		70		75		80		85		90		95		100	1.90522e-05	105		110	1.54777e-05	115		120		125
	5		10		15		20		25		30		35		40	2.1718e-05	45		50		55		60		65		70		75		80		85		90		95		100	2.14478e-05	105		110	1.61929e-05	115		120		125
	5		10		15		20		25		30		35		40	2.38662e-05	45		50		55		60		65		70		75		80		85		90		95		100	3.06357e-05	105		110	2.47531e-05	115		120		125
	5		10		15		20		25		30		35		40	1.98844e-05	45		50		55		60		65		70		75		80		85		90		95		100	1.98995e-05	105		110	9.29002e-05	115		120		125
	5		10		15		20		25		30		35		40	2.26527e-05	45		50		55		60		65		70		75		80		85		90		95		100	1.6712e-05	105		110	1.38551e-05	115		120		125
	5		10		15		20		25		30		35		40	2.74032e-05	45		50		55		60		65		70		75		80		85		90		95		100	0.000165165	105		110	1.29119e-05	115		120		125
	5		10		15		20		25		30		35		40	2.51452e-05	45		50		55		60		65		70		75		80		85		90		95		100	1.84179e-05	105		110	1.35304e-05	115		120		125
	5		10		15		20		25		30		35		40	4.44686e-05	45		50		55		60		65		70		75		80		85		90		95		100	1.84348e-05	105		110	2.21986e-05	115		120		125
	5		10		15		20		25		30		35		40	5.04648e-05	45		50		55		60		65		70		75		80		85		90		95		100	1.8427e-05	105		110	1.74503e-05	115		120		125
	5		10		15		20		25		30		35		40	2.10346e-05	45		50		55		60		65		70		75		80		85		90		95		100	2.60276e-05	105		110	5.78226e-05	115		120		125
	5		10		15		20		25		30		35		40	2.06353e-05	45		50		55		60		65		70		75		80		85		90		95		100	9.03333e-05	105		110	6.93912e-05	115		120		125
	5		10		15		20		25		30		35		40	3.06587e-05	45		50		55		60		65		70		75		80		85		90		95		100	4.14512e-05	105		110	5.94937e-05	115		120		125
	5		10		15		20		25		30		35		40	1.96561e-05	45		50		55		60		65		70		75		80		85		90		95		100	4.76108e-05	105		110	1.35008e-05	115		120		125
	5		10		15		20		25		30		35		40	3.0526e-05	45		50		55		60		65		70		75		80		85		90		95		100	3.33294e-05	105		110	2.62392e-05	115		120		125
	5		10		15		20		25		30		35		40	3.4637e-05	45		50		55		60		65		70		75		80		85		90		95		100	2.21854e-05	105		110	4.87589e-05	115		120		125
	5		10		15		20		25		30		35		40	2.97653e-05	45		50		55		60		65		70		75		80		85		90		95		100	3.08049e-05	105		110	2.17979e-05	115		120		125
	5		10		15		20		25		30		35		40	4.8926e-05	45		50		55		60		65		70		75		80		85		90		95		100	1.69603e-05	105		110	1.49822e-05	115		120		125
	5		10		15		20		25		30		35		40	3.02477e-05	45		50		55		60		65		70		75		80		85		90		95		100	2.21754e-05	105		110	3.01254e-05	115		120		125
	5		10		15		20		25		30		35		40	1.85772e-05	45		50		55		60		65		70		75		80		85		90		95		100	3.41742e-05	105		110	3.55362e-05	115		120		125
	5		10		15		20		25		30		35		40	3.51873e-05	45		50		55		60		65		70		75		80		85		90		95		100	1.80284e-05	105		110	7.08181e-05	115		120		125
	5		10		15		20		25		30		35		40	2.36173e-05	45		50		55		60		65		70		75		80		85		90		95		100	4.0396e-05	105		110	7.66433e-05	115		120		125
	5		10		15		20		25		30		35		40	2.4491e-05	45		50		55		60		65		70		75		80		85		90		95		100	2.427e-05	105		110	8.37108e-05	115		120		125
	5		10		15		20		25		30		35		40	2.28819e-05	45		50		55		60		65		70		75		80		85		90		95		100	1.81015e-05	105		110	4.7228e-05	115		120		125
	5		10		15		20		25		30		35		40	3.94825e-05	45		50		55		60		65		70		75		80		85		90		95		100	2.30295e-05	105		110	1.20661e-05	115		120		125
	5		10		15		20		25		30		35		40	2.11461e-05	45		50		55		60		65		70		75		80		85		90		95		100	1.67494e-05	105		110	3.0333e-05	115		120		125
	5		10		15		20		25		30		35		40	2.30677e-05	45		50		55		60		65		70		75		80		85		90		95		100	1.74679e-05	105		110	2.20943e-05	115		120		125
	5		10		15		20		25		30		35		40	2.60896e-05	45		50		55		60		65		70		75		80		85		90		95		100	2.79079e-05	105		110	1.59819e-05	115		120		125
	5		10		15		20		25		30		35		40	4.00025e-05	45		50		55		60		65		70		75		80		85		90		95		100	1.83876e-05	105		110	2.04265e-05	115		120		125
	5		10		15		20		25		30		35		40	5.61639e-05	45		50		55		60		65		70		75		80		85		90		95		100	2.25763e-05	105		110	4.6339e-05	115		120		125
	5		10		15		20		25		30		35		40	2.62078e-05	45		50		55		60		65		70		75		80		85		90		95		100	2.1245e-05	105		110	7.08869e-05	115		120		125
	5		10		15		20		25		30		35		40	3.64279e-05	45		50		55		60		65		70		75		80		85		90		95		100	7.51169e-05	105		110	2.28512e-05	115		120		125
	5		10		15		20		25		30		35		40	2.13436e-05	45		50		55		60		65		70		75		80		85		90		95		100	2.47007e-05	105		110	2.34242e-05	115		120		125
	5		10		15		20		25		30		35		40	3.0961e-05	45		50		55		60		65		70		75		80		85		90		95		100	2.1426e-05	105		110	3.2979e-05	115		120		125
	5		10		15		20		25		30		35		40	3.6686e-05	45		50		55		60		65		70		75		80		85		90		95		100	2.16698e-05	105		110	2.82459e-05	115		120		125
	5		10		15		20		25		30		35		40	3.64295e-05	45		50		55		60		65		70		75		80		85		90		95		100	4.1515e-05	105		110	1.50293e-05	115		120		125
	5		10		15		20		25		30		35		40	3.90338e-05	45		50		55		60		65		70		75		80		85		90		95		100	2.28596e-05	105		110	2.16102e-05	115		120		125
	5		10		15		20		25		30		35		40	3.4624e-05	45		50		55		60		65		70		75		80		85		90		95		100	2.54037e-05	105		110	1.22151e-05	115		120		125
	5		10		15		20		25		30		35		40	2.6064e-05	45		50		55		60		65		70		75		80		85		90		95		100	2.45e-05	105		110	1.50409e-05	115		120		125
	5		10		15		20		25		30		35		40	2.53461e-05	45		50		55		60		65		70		75		80		85		90		95		100	3.13936e-05	105		110	3.62567e-05	115		120		125
	5		10		15		20		25		30		35		40	1.99342e-05	45		50		55		60		65		70		75		80		85		90		95		100	1.73958e-05	105		110	4.95045e-05	115		120		125
	5		10		15		20		25		30		35		40	2.49221e-05	45		50		55		60		65		70		75		80		85		90		95		100	1.83395e-05	105		110	1.92144e-05	115		120		125
	5		10		15		20		25		30		35		40	1.80934e-05	45		50		55		60		65		70		75		80		85		90		95		100	2.18203e-05	105		110	1.23343e-05	115		120		125
	5		10		15		20		25		30		35		40	5.55649e-05	45		50		55		60		65		70		75		80		85		90		95		100	2.26615e-05	105		110	5.07128e-05	115		120		125
	5		10		15		20		25		30		35		40	4.22448e-05	45		50		55		60		65		70		75		80		85		90		95		100	5.38171e-05	105		110	1.22553e-05	115		120		125
	5		10		15		20		25		30		35		40	2.94316e-05	45		50		55		60		65		70		75		80		85		90		95		100	4.12941e-05	105		110	1.45422e-05	115		120		125
	5		10		15		20		25		30		35		40	2.80252e-05	45		50		55		60		65		70		75		80		85		90		95		100	3.52656e-05	105		110	2.54539e-05	115		120		125
	5		10		15		20		25		30		35		40	4.6112e-05	45		50		55		60		65		70		75		80		85		90		95		100	2.70696e-05	105		110	8.18055e-05	115		120		125
	5		10		15		20		25		30		35		40	3.7908e-05	45		50		55		60		65		70		75		80		85		90		95		100	1.71733e-05	105		110	2.8894e-05	115		120		125
	5		10		15		20		25		30		35		40	2.67069e-05	45		50		55		60		65		70		75		80		85		90		95		100	2.20326e-05	105		110	3.35256e-05	115		120		125
	5		10		15		20		25		30		35		40	1.86331e-05	45		50		55		60		65		70		75		80		85		90		95		100	2.31468e-05	105		110	4.4427e-05	115		120		125
	5		10		15		20		25		30		35		40	2.10693e-05	45		50		55		60		65		70		75		80		85		90		95		100	1.82623e-05	105		110	3.6252e-05	115		120		125
	5		10		15		20		25		30		35		40	2.44186e-05	45		50		55		60		65		70		75		80		85		90		95		100	3.11688e-05	105		110	1.74694e-05	115		120		125
	5		10		15		20		25		30		35		40	1.91394e-05	45		50		55		60		65		70		75		80		85		90		95		100	3.8476e-05	105		110	1.6307e-05	115		120		125
	5		10		15		20		25		30		35		40	3.02241e-05	45		50		55		60		65		70		75		80		85		90		95		100	0.00045772	105		110	1.3274e-05	115		120		125
	5		10		15		20		25		30		35		40	2.75979e-05	45		50		55		60		65		70		75		80		85		90		95		100	2.13403e-05	105		110	1.25796e-05	115		120		125
	5		10		15		20		25		30		35		40	3.28047e-05	45		50		55		60		65		70		75		80		85		90		95		100	2.02629e-05	105		110	4.16007e-05	115		120		125
	5		10		15		20		25		30		35		40	2.69872e-05	45		50		55		60		65		70		75		80		85		90		95		100	2.03942e-05	105		110	1.3132e-05	115		120		125
	5		10		15		20		25		30		35		40	6.22149e-05	45		50		55		60		65		70		75		80		85		90		95		100	2.95462e-05	105		110	2.01267e-05	115		120		125
	5		10		15		20		25		30		35		40	2.18586e-05	45		50		55		60		65		70		75		80		85		90		95		100	2.48527e-05	105		110	2.04487e-05	115		120		125
	5		10		15		20		25		30		35		40	2.20622e-05	45		50		55		60		65		70		75		80		85		90		95		100	3.18198e-05	105		110	1.92348e-05	115		120		125
	5		10		15		20		25		30		35		40	3.7205e-05	45		50		55		60		65		70		75		80		85		90		95		100	1.8574e-05	105		110	3.48931e-05	115		120		125
	5		10		15		20		25		30		35		40	1.80897e-05	45		50		55		60		65		70		75		80		85		90		95		100	3.03754e-05	105		110	3.27157e-05	115		120		125
	5		10		15		20		25		30		35		40	3.76772e-05	45		50		55		60		65		70		75		80		85		90		95		100	2.44273e-05	105		110	2.45696e-05	115		120		125
	5		10		15		20		25		30		35		40	4.3165e-05	45		50		55		60		65		70		75		80		85		90		95		100	2.13803e-05	105		110	2.76585e-05	115		120		125
	5		10		15		20		25		30		35		40	2.7223e-05	45		50		55		60		65		70		75		80		85		90		95		100	2.83656e-05	105		110	1.52365e-05	115		120		125
	5		10		15		20		25		30		35		40	2.45348e-05	45		50		55		60		65		70		75		80		85		90		95		100	2.78508e-05	105		110	2.767e-05	115		120		125
	5		10		15		20		25		30		35		40	2.84749e-05	45		50		55		60		65		70		75		80		85		90		95		100	3.5776e-05	105		110	2.12804e-05	115		120		125
	5		10		15		20		25		30		35		40	2.48752e-05	45		50		55		60		65		70		75		80		85		90		95		100	1.82757e-05	105		110	2.78218e-05	115		120		125
	5		10		15		20		25		30		35		40	6.3234e-05	45		50		55		60		65		70		75		80		85		90		95		100	2.86624e-05	105		110	2.33037e-05	115		120		125
	5		10		15		20		25		30		35		40	4.6329e-05	45		50		55		60		65		70		75		80		85		90		95		100	1.96538e-05	105		110	2.38409e-05	115		120		125
	5		10		15		20		25		30		35		40	2.59545e-05	45		50		55		60		65		70		75		80		85		90		95		100	2.52483e-05	105		110	3.02402e-05	115		120		125
	5		10		15		20		25		30		35		40	6.06289e-05	45		50		55		60		65		70		75		80		85		90		95		100	1.7473e-05	105		110	0.000232713	115		120		125
	5		10		15		20		25		30		35		40	2.37077e-05	45		50		55		60		65		70		75		80		85		90		95		100	1.92554e-05	105		110	1.68202e-05	115		120		125
	5		10		15		20		25		30		35		40	2.26206e-05	45		50		55		60		65		70		75		80		85		90		95		100	1.79794e-05	105		110	1.45915e-05	115		120		125
	5		10		15		20		25		30		35		40	7.90051e-05	45		50		55		60		65		70		75		80		85		90		95		100	2.84964e-05	105		110	2.08199e-05	115		120		125
	5		10		15		20		25		30		35		40	3.56222e-05	45		50		55		60		65		70		75		80		85		90		95		100	1.66692e-05	105		110	2.36116e-05	115		120		125
	5		10		15		20		25		30		35		40	2.28693e-05	45		50		55		60		65		70		75		80		85		90		95		100	1.9642e-05	105		110	2.68432e-05	115		120		125
	5		10		15		20		25		30		35		40	2.42375e-05	45		50		55		60		65		70		75		80		85		90		95		100	2.85303e-05	105		110	2.55494e-05	115		120		125
	5		10		15		20		25		30		35		40	3.5335e-05	45		50		55		60		65		70		75		80		85		90		95		100	2.16043e-05	105		110	4.07146e-05	115		120		125
	5		10		15		20		25		30		35		40	4.34142e-05	45		50		55		60		65		70		75		80		85		90		95		100	2.30255e-05	105		110	2.23985e-05	115		120		125
	5		10		15		20		25		30		35		40	2.0928e-05	45		50		55		60		65		70		75		80		85		90		95		100	1.87505e-05	105		110	2.14623e-05	115		120		125
	5		10		15		20		25		30		35		40	6.45325e-05	45		50		55		60		65		70		75		80		85		90		95		100	6.79263e-05	105		110	2.98196e-05	115		120		125
	5		10		15		20		25		30		35		40	3.46977e-05	45		50		55		60		65		70		75		80		85		90		95		100	1.81588e-05	105		110	1.22388e-05	115		120		125
	5		10		15		20		25		30		35		40	7.11735e-05	45		50		55		60		65		70		75		80		85		90		95		100	2.86737e-05	105		110	1.9557e-05	115		120		125
	5		10		15		20		25		30		35		40	2.78289e-05	45		50		55		60		65		70		75		80		85		90		95		100	2.96694e-05	105		110	1.91114e-05	115		120		125
	5		10		15		20		25		30		35		40	2.107e-05	45		50		55		60		65		70		75		80		85		90		95		100	2.66027e-05	105		110	1.48029e-05	115		120		125
	5		10		15		20		25		30		35		40	3.25374e-05	45		50		55		60		65		70		75		80		85		90		95		100	1.76381e-05	105		110	1.59815e-05	115		120		125
	5		10		15		20		25		30		35		40	3.31679e-05	45		50		55		60		65		70		75		80		85		90		95		100	1.88972e-05	105		110	1.23901e-05	115		120		125
	5		10		15		20		25		30		35		40	2.47818e-05	45		50		55		60		65		70		75		80		85		90		95		100	3.46343e-05	105		110	2.74705e-05	115		120		125
	5		10		15		20		25		30		35		40	2.86122e-05	45		50		55		60		65		70		75		80		85		90		95		100	1.68141e-05	105		110	2.3638e-05	115		120		125
	5		10		15		20		25		30		35		40	1.91828e-05	45		50		55		60		65		70		75		80		85		90		95		100	2.46937e-05	105		110	1.75657e-05	115		120		125
	5		10		15		20		25		30		35		40	2.49041e-05	45		50		55		60		65		70		75		80		85		90		95		100	2.40027e-05	105		110	1.91147e-05	115		120		125
	5		10		15		20		25		30		35		40	2.63754e-05	45		50		55		60		65		70		75		80		85		90		95		100	2.56142e-05	105		110	1.73683e-05	115		120		125
	5		10		15		20		25		30		35		40	3.59401e-05	45		50		55		60		65		70		75		80		85		90		95		100	2.57153e-05	105		110	2.7683e-05	115		120		125
	5		10		15		20		25		30		35		40	1.90704e-05	45		50		55		60		65		70		75		80		85		90		95		100	2.58818e-05	105		110	1.52571e-05	115		120		125
	5		10		15		20		25		30		35		40	2.73461e-05	45		50		55		60		65		70		75		80		85		90		95		100	4.11415e-05	105		110	2.2125e-05	115		120		125
	5		10		15		20		25		30		35		40	6.48731e-05	45		50		55		60		65		70		75		80		85		90		95		100	2.6878e-05	105		110	2.07365e-05	115		120		125
	5		10		15		20		25		30		35		40	4.08844e-05	45		50		55		60		65		70		75		80		85		90		95		100	1.70686e-05	105		110	2.31966e-05	115		120		125
	5		10		15		20		25		30		35		40	3.80887e-05	45		50		55		60		65		70		75		80		85		90		95		100	3.18312e-05	105		110	2.54418e-05	115		120		125
	5		10		15		20		25		30		35		40	2.36586e-05	45		50		55		60		65		70		75		80		85		90		95		100	2.57725e-05	105		110	1.30059e-05	115		120		125
	5		10		15		20		25		30		35		40	5.2813e-05	45		50		55		60		65		70		75		80		85		90		95		100	2.0607e-05	105		110	3.34344e-05	115		120		125
	5		10		15		20		25		30		35		40	2.02098e-05	45		50		55		60		65		70		75		80		85		90		95		100	2.43304e-05	105		110	5.3266e-05	115		120		125
	5		10		15		20		25		30		35		40	2.21494e-05	45		50		55		60		65		70		75		80		85		90		95		100	3.32226e-05	105		110	6.15081e-05	115		120		125
	5		10		15		20		25		30		35		40	1.96318e-05	45		50		55		60		65		70		75		80		85		90		95		100	3.67938e-05	105		110	2.70458e-05	115		120		125
	5		10		15		20		25		30		35		40	1.94265e-05	45		50		55		60		65		70		75		80		85		90		95		100	3.19178e-05	105		110	4.64189e-05	115		120		125
	5		10		15		20		25		30		35		40	2.2855e-05	45		50		55		60		65		70		75		80		85		90		95		100	2.02632e-05	105		110	6.53468e-05	115		120		125
	5		10		15		20		25		30		35		40	2.28876e-05	45		50		55		60		65		70		75		80		85		90		95		100	3.91306e-05	105		110	2.00604e-05	115		120		125
	5		10		15		20		25		30		35		40	2.06825e-05	45		50		55		60		65		70		75		80		85		90		95		100	2.67049e-05	105		110	1.79299e-05	115		120		125
	5		10		15		20		25		30		35		40	2.43917e-05	45		50		55		60		65		70		75		80		85		90		95		100	2.07317e-05	105		110	1.21601e-05	115		120		125
	5		10		15		20		25		30		35		40	2.57755e-05	45		50		55		60		65		70		75		80		85		90		95		100	2.81203e-05	105		110	1.81638e-05	115		120		125
	5		10		15		20		25		30		35		40	3.62691e-05	45		50		55		60		65		70		75		80		85		90		95		100	2.80592e-05	105		110	1.89298e-05	115		120		125
	5		10		15		20		25		30		35		40	2.9744e-05	45		50		55		60		65		70		75		80		85		90		95		100	2.10893e-05	105		110	5.20501e-05	115		120		125
	5		10		15		20		25		30		35		40	2.53596e-05	45		50		55		60		65		70		75		80		85		90		95		100	1.81067e-05	105		110	2.78391e-05	115		120		125
	5		10		15		20		25		30		35		40	3.04897e-05	45		50		55		60		65		70		75		80		85		90		95		100	1.95506e-05	105		110	3.04893e-05	115		120		125
	5		10		15		20		25		30		35		40	3.20937e-05	45		50		55		60		65		70		75		80		85		90		95		100	2.64001e-05	105		110	5.29691e-05	115		120		125
	5		10		15		20		25		30		35		40	3.46438e-05	45		50		55		60		65		70		75		80		85		90		95		100	1.68822e-05	105		110	1.21288e-05	115		120		125
	5		10		15		20		25		30		35		40	4.79637e-05	45		50		55		60		65		70		75		80		85		90		95		100	1.71496e-05	105		110	2.37542e-05	115		120		125
	5		10		15		20		25		30		35		40	3.93094e-05	45		50		55		60		65		70		75		80		85		90		95		100	2.2167e-05	105		110	7.1105e-05	115		120		125
	5		10		15		20		25		30		35		40	4.2226e-05	45		50		55		60		65		70		75		80		85		90		95		100	2.80185e-05	105		110	7.83967e-05	115		120		125
	5		10		15		20		25		30		35		40	3.06956e-05	45		50		55		60		65		70		75		80		85		90		95		100	2.37083e-05	105		110	3.35025e-05	115		120		125
	5		10		15		20		25		30		35		40	4.48717e-05	45		50		55		60		65		70		75		80		85		90		95		100	2.63284e-05	105		110	0.000206303	115		120		125
	5		10		15		20		25		30		35		40	5.22451e-05	45		50		55		60		65		70		75		80		85		90		95		100	1.66631e-05	105		110	2.8813e-05	115		120		125
	5		10		15		20		25		30		35		40	2.11492e-05	45		50		55		60		65		70		75		80		85		90		95		100	2.23908e-05	105		110	2.03189e-05	115		120		125
	5		10		15		20		25		30		35		40	3.07262e-05	45		50		55		60		65		70		75		80		85		90		95		100	3.32216e-05	105		110	3.43503e-05	115		120		125
	5		10		15		20		25		30		35		40	2.30309e-05	45		50		55		60		65		70		75		80		85		90		95		100	2.85625e-05	105		110	4.49278e-05	115		120		125
	5		10		15		20		25		30		35		40	2.48994e-05	45		50		55		60		65		70		75		80		85		90		95		100	2.81517e-05	105		110	4.06028e-05	115		120		125
	5		10		15		20		25		30		35		40	1.88795e-05	45		50		55		60		65		70		75		80		85		90		95		100	2.06952e-05	105		110	1.34635e-05	115		120		125
	5		10		15		20		25		30		35		40	3.1785e-05	45		50		55		60		65		70		75		80		85		90		95		100	1.99419e-05	105		110	1.63251e-05	115		120		125
	5		10		15		20		25		30		35		40	3.40356e-05	45		50		55		60		65		70		75		80		85		90		95		100	4.6329e-05	105		110	8.15403e-05	115		120		125
	5		10		15		20		25		30		35		40	2.71364e-05	45		50		55		60		65		70		75		80		85		90		95		100	2.2315e-05	105		110	1.84263e-05	115		120		125
	5		10		15		20		25		30		35		40	1.82066e-05	45		50		55		60		65		70		75		80		85		90		95		100	2.92034e-05	105		110	9.2416e-05	115		120		125
	5		10		15		20		25		30		35		40	2.03708e-05	45		50		55		60		65		70		75		80		85		90		95		100	2.41038e-05	105		110	5.28809e-05	115		120		125
	5		10		15		20		25		30		35		40	4.28883e-05	45		50		55		60		65		70		75		80		85		90		95		100	3.25062e-05	105		110	1.20918e-05	115		120		125
	5		10		15		20		25		30		35		40	8.70087e-05	45		50		55		60		65		70		75		80		85		90		95		100	2.60382e-05	105		110	2.46652e-05	115		120		125
	5		10		15		20		25		30		35		40	2.99737e-05	45		50		55		60		65		70		75		80		85		90		95		100	2.96372e-05	105		110	1.25886e-05	115		120		125
	5		10		15		20		25		30		35		40	2.21242e-05	45		50		55		60		65		70		75		80		85		90		95		100	1.96086e-05	105		110	2.62585e-05	115		120		125
	5		10		15		20		25		30		35		40	3.34405e-05	45		50		55		60		65		70		75		80		85		90		95		100	1.9406e-05	105		110	3.36982e-05	115		120		125
	5		10		15		20		25		30		35		40	2.14293e-05	45		50		55		60		65		70		75		80		85		90		95		100	1.69609e-05	105		110	1.24216e-05	115		120		125
	5		10		15		20		25		30		35		40	2.93533e-05	45		50		55		60		65		70		75		80		85		90		95		100	1.91542e-05	105		110	2.87202e-05	115		120		125
	5		10		15		20		25		30		35		40	2.01299e-05	45		50		55		60		65		70		75		80		85		90		95		100	3.0683e-05	105		110	1.65421e-05	115		120		125
	5		10		15		20		25		30		35		40	2.47916e-05	45		50		55		60		65		70		75		80		85		90		95		100	2.13581e-05	105		110	2.38658e-05	115		120		125
	5		10		15		20		25		30		35		40	2.59365e-05	45		50		55		60		65		70		75		80		85		90		95		100	4.185e-05	105		110	1.43783e-05	115		120		125
	5		10		15		20		25		30		35		40	3.3713e-05	45		50		55		60		65		70		75		80		85		90		95		100	1.85999e-05	105		110	4.09415e-05	115		120		125
	5		10		15		20		25		30		35		40	1.86284e-05	45		50		55		60		65		70		75		80		85		90		95		100	2.44027e-05	105		110	1.55454e-05	115		120		125
	5		10		15		20		25		30		35		40	5.10879e-05	45		50		55		60		65		70		75		80		85		90		95		100	3.50571e-05	105		110	2.97607e-05	115		120		125
	5		10		15		20		25		30		35		40	6.01941e-05	45		50		55		60		65		70		75		80		85		90		95		100	3.89282e-05	105		110	2.78343e-05	115		120		125
	5		10		15		20		25		30		35		40	0.000109739	45		50		55		60		65		70		75		80		85		90		95		100	2.31086e-05	105		110	2.29259e-05	115		120		125
	5		10		15		20		25		30		35		40	2.16431e-05	45		50		55		60		65		70		75		80		85		90		95		100	3.2946e-05	105		110	1.44637e-05	115		120		125
	5		10		15		20		25		30		35		40	2.56862e-05	45		50		55		60		65		70		75		80		85		90		95		100	2.69267e-05	105		110	2.08622e-05	115		120		125
	5		10		15		20		25		30		35		40	7.67545e-05	45		50		55		60		65		70		75		80		85		90		95		100	1.85046e-05	105		110	2.39112e-05	115		120		125
	5		10		15		20		25		30		35		40	3.22668e-05	45		50		55		60		65		70		75		80		85		90		95		100	2.95641e-05	105		110	1.94914e-05	115		120		125
	5		10		15		20		25		30		35		40	3.15085e-05	45		50		55		60		65		70		75		80		85		90		95		100	1.69275e-05	105		110	1.75041e-05	115		120		125
	5		10		15		20		25		30		35		40	3.32491e-05	45		50		55		60		65		70		75		80		85		90		95		100	3.45198e-05	105		110	3.20399e-05	115		120		125
	5		10		15		20		25		30		35		40	4.1977e-05	45		50		55		60		65		70		75		80		85		90		95		100	1.68295e-05	105		110	1.66765e-05	115		120		125
	5		10		15		20		25		30		35		40	2.40334e-05	45		50		55		60		65		70		75		80		85		90		95		100	6.19104e-05	105		110	2.45523e-05	115		120		125
	5		10		15		20		25		30		35		40	4.27433e-05	45		50		55		60		65		70		75		80		85		90		95		100	1.85914e-05	105		110	1.65341e-05	115		120		125
	5		10		15		20		25		30		35		40	0.000212843	45		50		55		60		65		70		75		80		85		90		95		100	2.21963e-05	105		110	3.45365e-05	115		120		125
	5		10		15		20		25		30		35		40	2.15705e-05	45		50		55		60		65		70		75		80		85		90		95		100	3.61468e-05	105		110	7.71855e-05	115		120		125
	5		10		15		20		25		30		35		40	2.28197e-05	45		50		55		60		65		70		75		80		85		90		95		100	2.09505e-05	105		110	2.1062e-05	115		120		125
	5		10		15		20		25		30		35		40	2.04143e-05	45		50		55		60		65		70		75		80		85		90		95		100	1.87973e-05	105		110	1.55861e-05	115		120		125
	5		10		15		20		25		30		35		40	5.78693e-05	45		50		55		60		65		70		75		80		85		90		95		100	1.83134e-05	105		110	2.2434e-05	115		120		125
	5		10		15		20		25		30		35		40	8.7809e-05	45		50		55		60		65		70		75		80		85		90		95		100	2.19206e-05	105		110	1.62367e-05	115		120		125
	5		10		15		20		25		30		35		40	3.41416e-05	45		50		55		60		65		70		75		80		85		90		95		100	3.64939e-05	105		110	3.20442e-05	115		120		125
	5		10		15		20		25		30		35		40	5.59263e-05	45		50		55		60		65		70		75		80		85		90		95		100	1.88333e-05	105		110	1.95962e-05	115		120		125
	5		10		15		20		25		30		35		40	1.9568e-05	45		50		55		60		65		70		75		80		85		90		95		100	2.28212e-05	105		110	1.26471e-05	115		120		125
	5		10		15		20		25		30		35		40	3.37932e-05	45		50		55		60		65		70		75		80		85		90		95		100	3.10349e-05	105		110	2.51592e-05	115		120		125
	5		10		15		20		25		30		35		40	2.79716e-05	45		50		55		60		65		70		75		80		85		90		95		100	2.17539e-05	105		110	3.86184e-05	115		120		125
	5		10		15		20		25		30		35		40	7.23362e-05	45		50		55		60		65		70		75		80		85		90		95		100	1.70245e-05	105		110	2.65247e-05	115		120		125
	5		10		15		20		25		30		35		40	3.27996e-05	45		50		55		60		65		70		75		80		85		90		95		100	2.97828e-05	105		110	3.73933e-05	115		120		125
	5		10		15		20		25		30		35		40	1.91911e-05	45		50		55		60		65		70		75		80		85		90		95		100	4.00195e-05	105		110	6.92538e-05	115		120		125
	5		10		15		20		25		30		35		40	1.89752e-05	45		50		55		60		65		70		75		80		85		90		95		100	2.39535e-05	105		110	2.40746e-05	115		120		125
	5		10		15		20		25		30		35		40	4.3818e-05	45		50		55		60		65		70		75		80		85		90		95		100	2.69004e-05	105		110	2.83362e-05	115		120		125
	5		10		15		20		25		30		35		40	2.31847e-05	45		50		55		60		65		70		75		80		85		90		95		100	1.96921e-05	105		110	3.46289e-05	115		120		125
	5		10		15		20		25		30		35		40	4.50767e-05	45		50		55		60		65		70		75		80		85		90		95		100	1.81923e-05	105		110	1.59888e-05	115		120		125
	5		10		15		20		25		30		35		40	4.31573e-05	45		50		55		60		65		70		75		80		85		90		95		100	3.296e-05	105		110	1.29634e-05	115		120		125
	5		10		15		20		25		30		35		40	4.66894e-05	45		50		55		60		65		70		75		80		85		90		95		100	2.08774e-05	105		110	6.15722e-05	115		120		125
	5		10		15		20		25		30		35		40	2.06065e-05	45		50		55		60		65		70		75		80		85		90		95		100	2.08247e-05	105		110	3.80704e-05	115		120		125
	5		10		15		20		25		30		35		40	3.24574e-05	45		50		55		60		65		70		75		80		85		90		95		100	1.66132e-05	105		110	4.4189e-05	115		120		125
	5		10		15		20		25		30		35		40	6.1764e-05	45		50		55		60		65		70		75		80		85		90		95		100	2.68121e-05	105		110	2.7344e-05	115		120		125
	5		10		15		20		25		30		35		40	0.000114212	45		50		55		60		65		70		75		80		85		90		95		100	1.97048e-05	105		110	5.30512e-05	115		120		125
	5		10		15		20		25		30		35		40	2.26503e-05	45		50		55		60		65		70		75		80		85		90		95		100	1.98744e-05	105		110	7.81313e-05	115		120		125
	5		10		15		20		25		30		35		40	4.13757e-05	45		50		55		60		65		70		75		80		85		90		95		100	1.82875e-05	105		110	2.08348e-05	115		120		125
	5		10		15		20		25		30		35		40	2.60408e-05	45		50		55		60		65		70		75		80		85		90		95		100	2.9321e-05	105		110	2.0095e-05	115		120		125
	5		10		15		20		25		30		35		40	3.14325e-05	45		50		55		60		65		70		75		80		85		90		95		100	2.31841e-05	105		110	3.97813e-05	115		120		125
	5		10		15		20		25		30		35		40	2.27408e-05	45		50		55		60		65		70		75		80		85		90		95		100	2.00959e-05	105		110	2.98598e-05	115		120		125
	5		10		15		20		25		30		35		40	2.13009e-05	45		50		55		60		65		70		75		80		85		90		95		100	1.9789e-05	105		110	1.76714e-05	115		120		125
	5		10		15		20		25		30		35		40	7.09693e-05	45		50		55		60		65		70		75		80		85		90		95		100	2.19173e-05	105		110	1.87118e-05	115		120		125
	5		10		15		20		25		30		35		40	2.38771e-05	45		50		55		60		65		70		75		80		85		90		95		100	2.4468e-05	105		110	1.25109e-05	115		120		125
	5		10		15		20		25		30		35		40	2.19606e-05	45		50		55		60		65		70		75		80		85		90		95		100	1.93333e-05	105		110	2.42042e-05	115		120		125
	5		10		15		20		25		30		35		40	2.32852e-05	45		50		55		60		65		70		75		80		85		90		95		100	2.79238e-05	105		110	1.73128e-05	115		120		125
	5		10		15		20		25		30		35		40	1.95013e-05	45		50		55		60		65		70		75		80		85		90		95		100	1.68308e-05	105		110	3.83443e-05	115		120		125
	5		10		15		20		25		30		35		40	3.67479e-05	45		50		55		60		65		70		75		80		85		90		95		100	1.71942e-05	105		110	3.74894e-05	115		120		125
	5		10		15		20		25		30		35		40	2.59001e-05	45		50		55		60		65		70		75		80		85		90		95		100	4.86556e-05	105		110	1.97949e-05	115		120		125
	5		10		15		20		25		30		35		40	3.22326e-05	45		50		55		60		65		70		75		80		85		90		95		100	4.02038e-05	105		110	2.95497e-05	115		120		125
	5		10		15		20		25		30		35		40	4.09194e-05	45		50		55		60		65		70		75		80		85		90		95		100	2.6113e-05	105		110	2.73082e-05	115		120		125
	5		10		15		20		25		30		35		40	2.08971e-05	45		50		55		60		65		70		75		80		85		90		95		100	2.4897e-05	105		110	3.49745e-05	115		120		125
	5		10		15		20		25		30		35		40	5.87231e-05	45		50		55		60		65		70		75		80		85		90		95		100	2.29754e-05	105		110	2.19237e-05	115		120		125
	5		10		15		20		25		30		35		40	1.95405e-05	45		50		55		60		65		70		75		80		85		90		95		100	2.22361e-05	105		110	8.44123e-05	115		120		125
	5		10		15		20		25		30		35		40	2.00745e-05	45		50		55		60		65		70		75		80		85		90		95		100	2.11596e-05	105		110	1.34462e-05	115		120		125
	5		10		15		20		25		30		35		40	2.98442e-05	45		50		55		60		65		70		75		80		85		90		95		100	2.95201e-05	105		110	1.56163e-05	115		120		125
	5		10		15		20		25		30		35		40	2.26146e-05	45		50		55		60		65		70		75		80		85		90		95		100	2.52949e-05	105		110	1.35264e-05	115		120		125
	5		10		15		20		25		30		35		40	2.03591e-05	45		50		55		60		65		70		75		80		85		90		95		100	1.83225e-05	105		110	2.20176e-05	115		120		125
	5		10		15		20		25		30		35		40	3.17263e-05	45		50		55		60		65		70		75		80		85		90		95		100	1.66163e-05	105		110	2.24673e-05	115		120		125
	5		10		15		20		25		30		35		40	3.42063e-05	45		50		55		60		65		70		75		80		85		90		95		100	2.06354e-05	105		110	2.35007e-05	115		120		125
	5		10		15		20		25		30		35		40	2.6203e-05	45		50		55		60		65		70		75		80		85		90		95		100	2.55413e-05	105		110	3.18411e-05	115		120		125
	5		10		15		20		25		30		35		40	3.10484e-05	45		50		55		60		65		70		75		80		85		90		95		100	2.1787e-05	105		110	2.86357e-05	115		120		125
	5		10		15		20		25		30		35		40	2.07844e-05	45		50		55		60		65		70		75		80		85		90		95		100	1.69005e-05	105		110	4.82177e-05	115		120		125
	5		10		15		20		25		30		35		40	2.05312e-05	45		50		55		60		65		70		75		80		85		90		95		100	2.90031e-05	105		110	4.43978e-05	115		120		125
	5		10		15		20		25		30		35		40	2.59178e-05	45		50		55		60		65		70		75		80		85		90		95		100	2.27794e-05	105		110	3.20921e-05	115		120		125
	5		10		15		20		25		30		35		40	2.60206e-05	45		50		55		60		65		70		75		80		85		90		95		100	2.02917e-05	105		110	6.8589e-05	115		120		125
	5		10		15		20		25		30		35		40	2.45945e-05	45		50		55		60		65		70		75		80		85		90		95		100	1.88367e-05	105		110	1.34412e-05	115		120		125
	5		10		15		20		25		30		35		40	2.52637e-05	45		50		55		60		65		70		75		80		85		90		95		100	1.88205e-05	105		110	1.73763e-05	115		120		125
	5		10		15		20		25		30		35		40	5.01428e-05	45		50		55		60		65		70		75		80		85		90		95		100	1.68785e-05	105		110	2.46987e-05	115		120		125
	5		10		15		20		25		30		35		40	2.48129e-05	45		50		55		60		65		70		75		80		85		90		95		100	2.25558e-05	105		110	2.94377e-05	115		120		125
	5		10		15		20		25		30		35		40	3.42763e-05	45		50		55		60		65		70		75		80		85		90		95		100	1.94895e-05	105		110	2.90834e-05	115		120		125
	5		10		15		20		25		30		35		40	3.11933e-05	45		50		55		60		65		70		75		80		85		90		95		100	1.78671e-05	105		110	1.31301e-05	115		120		125
	5		10		15		20		25		30		35		40	2.6955e-05	45		50		55		60		65		70		75		80		85		90		95		100	2.83602e-05	105		110	1.64456e-05	115		120		125
	5		10		15		20		25		30		35		40	3.66926e-05	45		50		55		60		65		70		75		80		85		90		95		100	1.77478e-05	105		110	3.76274e-05	115		120		125
	5		10		15		20		25		30		35		40	2.44853e-05	45		50		55		60		65		70		75		80		85		90		95		100	1.9872e-05	105		110	1.31134e-05	115		120		125
	5		10		15		20		25		30		35		40	2.10147e-05	45		50		55		60		65		70		75		80		85		90		95		100	4.34652e-05	105		110	1.22114e-05	115		120		125
	5		10		15		20		25		30		35		40	6.39526e-05	45		50		55		60		65		70		75		80		85		90		95		100	3.71228e-05	105		110	1.23574e-05	115		120		125
	5		10		15		20		25		30		35		40	3.42309e-05	45		50		55		60		65		70		75		80		85		90		95		100	2.45665e-05	105		110	1.49897e-05	115		120		125
	5		10		15		20		25		30		35		40	4.88173e-05	45		50		55		60		65		70		75		80		85		90		95		100	2.09078e-05	105		110	2.46109e-05	115		120		125
	5		10		15		20		25		30		35		40	5.22652e-05	45		50		55		60		65		70		75		80		85		90		95		100	2.22764e-05	105		110	1.93069e-05	115		120		125
	5		10		15		20		25		30		35		40	3.05285e-05	45		50		55		60		65		70		75		80		85		90		95		100	2.80275e-05	105		110	7.5766e-05	115		120		125
	5		10		15		20		25		30		35		40	2.01414e-05	45		50		55		60		65		70		75		80		85		90		95		100	2.48936e-05	105		110	2.52427e-05	115		120		125
	5		10		15		20		25		30		35		40	3.30241e-05	45		50		55		60		65		70		75		80		85		90		95		100	3.7024e-05	105		110	2.76429e-05	115		120		125
	5		10		15		20		25		30		35		40	2.74065e-05	45		50		55		60		65		70		75		80		85		90		95		100	2.43581e-05	105		110	2.11971e-05	115		120		125
	5		10		15		20		25		30		35		40	1.92614e-05	45		50		55		60		65		70		75		80		85		90		95		100	2.02039e-05	105		110	1.95645e-05	115		120		125
	5		10		15		20		25		30		35		40	2.86961e-05	45		50		55		60		65		70		75		80		85		90		95		100	1.91375e-05	105		110	2.20508e-05	115		120		125
	5		10		15		20		25		30		35		40	2.65375e-05	45		50		55		60		65		70		75		80		85		90		95		100	2.3767e-05	105		110	1.82004e-05	115		120		125
	5		10		15		20		25		30		35		40	2.59336e-05	45		50		55		60		65		70		75		80		85		90		95		100	1.86972e-05	105		110	1.27028e-05	115		120		125
	5		10		15		20		25		30		35		40	2.51877e-05	45		50		55		60		65		70		75		80		85		90		95		100	2.00704e-05	105		110	2.79454e-05	115		120		125
	5		10		15		20		25		30		35		40	9.63288e-05	45		50		55		60		65		70		75		80		85		90		95		100	1.72081e-05	105		110	1.75995e-05	115		120		125
	5		10		15		20		25		30		35		40	2.83049e-05	45		50		55		60		65		70		75		80		85		90		95		100	2.68496e-05	105		110	0.000124335	115		120		125
	5		10		15		20		25		30		35		40	4.57889e-05	45		50		55		60		65		70		75		80		85		90		95		100	3.34687e-05	105		110	3.985e-05	115		120		125
	5		10		15		20		25		30		35		40	6.1229e-05	45		50		55		60		65		70		75		80		85		90		95		100	2.80459e-05	105		110	1.86175e-05	115		120		125
	5		10		15		20		25		30		35		40	3.302e-05	45		50		55		60		65		70		75		80		85		90		95		100	1.71019e-05	105		110	2.10672e-05	115		120		125
	5		10		15		20		25		30		35		40	4.00161e-05	45		50		55		60		65		70		75		80		85		90		95		100	3.95778e-05	105		110	2.40263e-05	115		120		125
	5		10		15		20		25		30		35		40	3.77791e-05	45		50		55		60		65		70		75		80		85		90		95		100	2.96998e-05	105		110	1.2739e-05	115		120		125
	5		10		15		20		25		30		35		40	3.54435e-05	45		50		55		60		65		70		75		80		85		90		95		100	8.83563e-05	105		110	1.41151e-05	115		120		125
	5		10		15		20		25		30		35		40	2.66489e-05	45		50		55		60		65		70		75		80		85		90		95		100	3.94304e-05	105		110	4.52571e-05	115		120		125
	5		10		15		20		25		30		35		40	0.000110937	45		50		55		60		65		70		75		80		85		90		95		100	2.15513e-05	105		110	3.32732e-05	115		120		125
	5		10		15		20		25		30		35		40	3.25485e-05	45		50		55		60		65		70		75		80		85		90		95		100	2.77727e-05	105		110	7.22611e-05	115		120		125
	5		10		15		20		25		30		35		40	2.89043e-05	45		50		55		60		65		70		75		80		85		90		95		100	1.80526e-05	105		110	1.93077e-05	115		120		125
	5		10		15		20		25		30		35		40	8.56284e-05	45		50		55		60		65		70		75		80		85		90		95		100	0.000108163	105		110	1.86678e-05	115		120		125
	5		10		15		20		25		30		35		40	3.38915e-05	45		50		55		60		65		70		75		80		85		90		95		100	7.22482e-05	105		110	7.98743e-05	115		120		125
	5		10		15		20		25		30		35		40	2.54789e-05	45		50		55		60		65		70		75		80		85		90		95		100	5.60273e-05	105		110	3.73575e-05	115		120		125
	5		10		15		20		25		30		35		40	2.41778e-05	45		50		55		60		65		70		75		80		85		90		95		100	2.74815e-05	105		110	3.16012e-05	115		120		125
	5		10		15		20		25		30		35		40	2.20398e-05	45		50		55		60		65		70		75		80		85		90		95		100	2.90024e-05	105		110	1.22841e-05	115		120		125
	5		10		15		20		25		30		35		40	2.21434e-05	45		50		55		60		65		70		75		80		85		90		95		100	3.11549e-05	105		110	2.47529e-05	115		120		125
	5		10		15		20		25		30		35		40	3.08078e-05	45		50		55		60		65		70		75		80		85		90		95		100	2.03257e-05	105		110	1.3678e-05	115		120		125
	5		10		15		20		25		30		35		40	2.10927e-05	45		50		55		60		65		70		75		80		85		90		95		100	2.97322e-05	105		110	0.000221757	115		120		125
	5		10		15		20		25		30		35		40	3.33191e-05	45		50		55		60		65		70		75		80		85		90		95		100	1.70409e-05	105		110	1.64664e-05	115		120		125
	5		10		15		20		25		30		35		40	2.5177e-05	45		50		55		60		65		70		75		80		85		90		95		100	2.78997e-05	105		110	1.70548e-05	115		120		125
	5		10		15		20		25		30		35		40	4.61361e-05	45		50		55		60		65		70		75		80		85		90		95		100	4.1328e-05	105		110	2.0954e-05	115		120		125
	5		10		15		20		25		30		35		40	2.46671e-05	45		50		55		60		65		70		75		80		85		90		95		100	3.84772e-05	105		110	2.11653e-05	115		120		125
	5		10		15		20		25		30		35		40	5.65774e-05	45		50		55		60		65		70		75		80		85		90		95		100	3.18179e-05	105		110	1.48854e-05	115		120		125
	5		10		15		20		25		30		35		40	8.99472e-05	45		50		55		60		65		70		75		80		85		90		95		100	3.19197e-05	105		110	5.52397e-05	115		120		125
[truncated: 2,548 more rows]
[truncated: 35 more columns]
